# Supplementary material
Source: PubMed Central journal article supplement (PMC5621004)

## SUPPORTING INFORMATION

# **<sup>18</sup>F-Deoxyfluorination of Phenols via Ru $\pi$ -Complexes**

M. Hassan Beyzavi,<sup>1,2||</sup> Debashis Mandal,<sup>1||</sup> Martin G. Strebl,<sup>1,2||</sup> Constanze N. Neumann,<sup>1</sup>  
Erica M. D'Amato,<sup>1</sup> Junting Chen,<sup>4</sup> Jacob M. Hooker<sup>2,3</sup>, Tobias Ritter\*<sup>1,3,4</sup>

<sup>1</sup> Department of Chemistry and Chemical Biology, Harvard University, 12 Oxford Street, Cambridge, Massachusetts 02138, United States

<sup>2</sup> Athinoula A. Martinos Center for Biomedical Imaging, Massachusetts General Hospital and Harvard Medical School, Charlestown, MA 02129.

<sup>3</sup> Division of Nuclear Medicine and Molecular Imaging, Department of Radiology, Massachusetts General Hospital, Boston, MA 02144.

<sup>4</sup> Max-Planck-Institut für Kohlenforschung, Kaiser-Wilhelm-Platz 1, D-45470 Mülheim an der Ruhr

\*E-mail: [ritter@mpi-muelheim.mpg.de](mailto:ritter@mpi-muelheim.mpg.de)

## TABLE OF CONTENTS

|                                                                               |    |
|-------------------------------------------------------------------------------|----|
| MATERIALS AND METHODS.....                                                    | 4  |
| EXPERIMENTAL DATA .....                                                       | 5  |
| Experimental Procedures and Compound Characterization .....                   | 5  |
| [CpRu(cod)Cl] ( <b>1</b> ) .....                                              | 5  |
| Alkenyltriflate <b>S2</b> .....                                               | 7  |
| Phenol <b>3</b> .....                                                         | 9  |
| [[ $\eta^6$ -3,4,5-Trimethylphenol)RuCp]Cl ( <b>5</b> ) .....                 | 10 |
| Methylpiperazin <b>S5</b> .....                                               | 11 |
| [[ $\eta^6$ -5-Fluoro-1,2,3-trimethylbenzene)RuCp]Cl ( <b>6</b> ).....        | 11 |
| Methoxyaniline <b>S6</b> .....                                                | 12 |
| 3-Fluoro-carbazole [ $^{19}\text{F}$ ] <b>7f</b> .....                        | 14 |
| 3- Fluoro-7-nitro-phenothiazin [ $^{19}\text{F}$ ] <b>7g</b> .....            | 15 |
| Hydroxypropylazetidid [ $^{19}\text{F}$ ] <b>7h</b> .....                     | 16 |
| N-(4-Fluorophenyl)benzamide ([ $^{19}\text{F}$ ] <b>7j</b> ) .....            | 17 |
| Purin [ $^{19}\text{F}$ ] <b>7l</b> .....                                     | 17 |
| Fluoro-L-tyrosinate [ $^{19}\text{F}$ ] <b>7n</b> .....                       | 18 |
| Ethyl 4-fluoro-1H-indole-1-carboxylate ([ $^{19}\text{F}$ ] <b>7o</b> ) ..... | 19 |
| Fluoro-deoxytocopherol [ $^{19}\text{F}$ ] <b>7p</b> .....                    | 20 |
| Acetanilide <b>S7</b> .....                                                   | 21 |
| Methyl acetyl-L-tyrosinate ( <b>8</b> ).....                                  | 21 |
| Phenothiazine <b>S8</b> .....                                                 | 22 |
| Fluoro-acetyl-L-tyrosinate [ $^{19}\text{F}$ ] <b>9</b> .....                 | 23 |
| Acetyl-phenothiazin <b>S9</b> .....                                           | 23 |
| Hydroxy-phenothiazin <b>S10</b> .....                                         | 24 |
| N-(4-Hydroxyphenyl)benzamide ( <b>S11</b> ) .....                             | 25 |
| Purin <b>S13</b> .....                                                        | 26 |

---

|                                                                                  |    |
|----------------------------------------------------------------------------------|----|
| 4-Fluoroaniline <b>S16</b> .....                                                 | 27 |
| 2,4-Dinitrophenylthio-acetamide <b>S17</b> .....                                 | 27 |
| 3-Fluoro-7-nitro-10H-phenothiazine ( <b>S18</b> ) .....                          | 28 |
| tert-Butyldiphenylsilyloxy-phenylazetidid <b>S20</b> .....                       | 28 |
| PMB-ether <b>S21</b> .....                                                       | 29 |
| 4-Hydroxyphenylazetidid <b>S22</b> .....                                         | 30 |
| Fluorophenylazetidid <b>S23</b> .....                                            | 31 |
| Radiochemistry general methods.....                                              | 32 |
| Optimization studies for deoxy[ <sup>18</sup> F]fluorination of phenols.....     | 33 |
| General procedure for [ <sup>18</sup> F]deoxyfluorination of phenols .....       | 39 |
| [ <sup>18</sup> F]-β-CFT ( <b>4</b> ).....                                       | 40 |
| [ <sup>18</sup> F]1-(Fluoro)-4-methoxybenzene ( <b>7a</b> ) .....                | 42 |
| [ <sup>18</sup> F]Benzylpiperazin <b>7b</b> .....                                | 43 |
| [ <sup>18</sup> F]Piperazin <b>7c</b> .....                                      | 45 |
| [ <sup>18</sup> F]Estrone <b>7d</b> .....                                        | 46 |
| [ <sup>18</sup> F](4-(Fluoro)phenyl)methanamine ( <b>7e</b> ) .....              | 48 |
| [ <sup>18</sup> F]Ethyl 3-(fluoro)-9H-carbazole-9-carboxylate ( <b>7f</b> )..... | 49 |
| [ <sup>18</sup> F]Phenothiazin <b>7g</b> .....                                   | 51 |
| [ <sup>18</sup> F]Fluorodeoxyezetimibe ( <b>7h</b> ).....                        | 52 |
| [ <sup>18</sup> F](4-(3-(Fluoro)phenyl)morpholine) ( <b>7i</b> ).....            | 54 |
| [ <sup>18</sup> F]4-Fluorobenzanilide ( <b>7j</b> ) .....                        | 55 |
| [ <sup>18</sup> F]4-(Fluoro)-2-phenylquinoline ( <b>7k</b> ).....                | 57 |
| [ <sup>18</sup> F]Purin <b>7l</b> .....                                          | 58 |
| [ <sup>18</sup> F]5-Bromo-2-(fluoro)pyrimidine ( <b>7m</b> ).....                | 60 |
| [ <sup>18</sup> F]L-tyrosinate <b>7n</b> .....                                   | 61 |
| [ <sup>18</sup> F]Ethyl 4-(fluoro)-1H-indole-1-carboxylate ( <b>7o</b> ).....    | 63 |
| [ <sup>18</sup> F]Chromane <b>7p</b> .....                                       | 64 |

---

|                                                                        |     |
|------------------------------------------------------------------------|-----|
| Automated radiosynthesis .....                                         | 66  |
| DFT Calculations Supporting the Proposed Mechanism .....               | 74  |
| Methods for DFT calculations .....                                     | 74  |
| Tetrahedral adduct RuCp 4-methoxyphenol .....                          | 74  |
| Uronium fluoride RuCp 4-methoxyphenol .....                            | 78  |
| TS1 RuCp 4-methoxyphenol .....                                         | 82  |
| Meisenheimer intermediate RuCp 4-methoxyphenol .....                   | 86  |
| TS2 RuCp 4-methoxyphenol .....                                         | 90  |
| Uronium bifluoride RuCp 4-methoxyphenol .....                          | 94  |
| Uronium fluoride 4-methoxyphenol .....                                 | 98  |
| Uronium bifluoride 4-methoxyphenol .....                               | 102 |
| Product complex RuCp 4-fluoroanisole PhenoFluor-urea .....             | 105 |
| Intrinsic reaction coordinates .....                                   | 109 |
| Activation barriers for ruthenium-mediated deoxyfluorination .....     | 110 |
| Tetrahedral adduct stabilization through ruthenium incorporation ..... | 111 |
| X-Ray Crystallography .....                                            | 114 |
| REFERENCES .....                                                       | 134 |
| SPECTROSCOPIC DATA .....                                               | 136 |
| NMR Data .....                                                         | 136 |

## MATERIALS AND METHODS

All air- and/or moisture-sensitive reactions were performed under an inert atmosphere of nitrogen or argon with standard Schlenk and glovebox techniques.<sup>1</sup>

### Solvents

Tetrahydrofuran was distilled from deep purple sodium benzophenone ketyl. Dry DMF and dry DMSO were purchased from Acros Organics. Other anhydrous solvents (acetonitrile, diethyl ether, dichloromethane, pentane, and toluene) were obtained by filtration through drying columns<sup>2</sup> on an mBraun system.

### Chromatography

Thin layer chromatography (TLC) was performed by EMD TLC plates pre-coated with 250  $\mu\text{m}$  thickness silica gel 60 F<sub>254</sub> plates and visualized by fluorescence quenching under UV light and KMnO<sub>4</sub> stain.

Preparative TLC was performed using Analtech Uniplates pre-coated with 1000  $\mu\text{m}$  thickness silica gel GF.

Flash chromatography was performed using silica gel (230-400 mesh) purchased from Silicycle Inc.

### Spectroscopy and Instruments

NMR spectra were recorded on either a Varian Unity/Inova 600 spectrometer operating at 600 MHz for <sup>1</sup>H acquisitions, a Bruker 500 spectrometer or a Varian Unity/Inova 500 spectrometer, both operating at 500 MHz, 471 MHz and 126 MHz for <sup>1</sup>H, <sup>19</sup>F and <sup>13</sup>C acquisitions, respectively, or a Varian Mercury 400 spectrometer operating at 375 MHz for <sup>19</sup>F acquisitions. Chemical shifts are reported in ppm with the solvent resonance as the internal standard (<sup>1</sup>H: CDCl<sub>3</sub>,  $\delta$  7.26; CD<sub>2</sub>Cl<sub>2</sub>,  $\delta$  5.32; CD<sub>3</sub>OD,  $\delta$  3.31; CD<sub>3</sub>CN,  $\delta$  1.94), (<sup>13</sup>C: CDCl<sub>3</sub>,  $\delta$  77.16; CD<sub>2</sub>Cl<sub>2</sub>,  $\delta$  53.84; CD<sub>3</sub>OD,  $\delta$  49.00; CD<sub>3</sub>CN,  $\delta$  1.32). Data is reported as follows: s = singlet, d = doublet, t = triplet, q = quartet, m = multiplet, br = broad; coupling constants in Hz; integration.

### Starting materials

All substrates and reagents were used as received from commercial suppliers unless otherwise stated.

## EXPERIMENTAL DATA

## Experimental Procedures and Compound Characterization

**[CpRu(cod)Cl] (1)**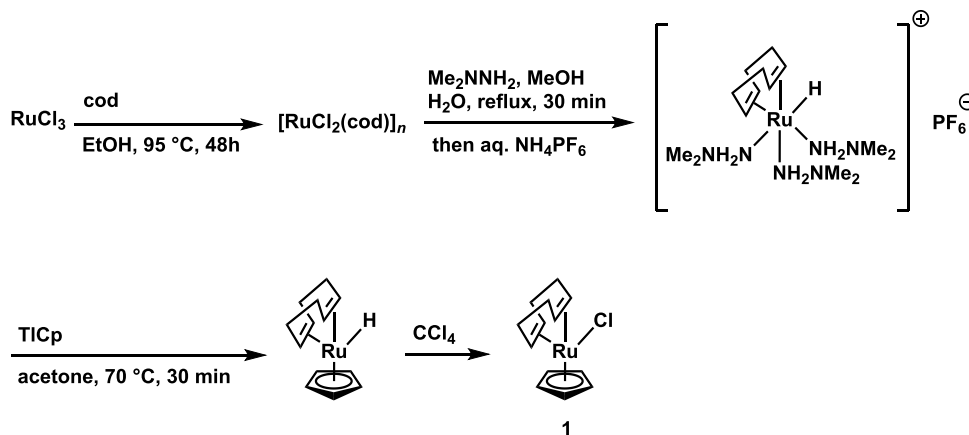**[RuCl<sub>2</sub>(cod)]<sub>n</sub>**

A two-neck round bottom flask was flame-dried and purged with  $\text{N}_2$ . Ruthenium trichloride hydrate ( $\text{RuCl}_3 \cdot x \text{H}_2\text{O}$ , 7.4 g, 0.03 mol, 1 eq.) was added to the flask. The flask was evacuated and kept under vacuum for 1 h and then was purged with  $\text{N}_2$ . To the flask were added 1,5-cyclooctadiene (20 mL, 18 g, 0.16 mol, 5 eq.) and ethanol (0.14 L,  $c = 0.2 \text{ M}$ ) to give a dark brown solution. The reaction mixture was stirred and heated at reflux for 48 h and subsequently cooled to  $23\text{ }^\circ\text{C}$ . The resulting brown precipitate was filtered off through a sintered glass funnel under air, and washed thoroughly with ethanol (50 mL). The brown solid was dried under vacuum for 48 h to afford  $[\text{RuCl}_2(\text{cod})]_n$  (8.2 g). The material was used in the subsequent step without further purification.

Note: Commercial  $\text{RuCl}_3 \cdot x \text{H}_2\text{O}$  has variable water content, the total ruthenium content is 40–43%.

**[(cod)RuH(NH<sub>2</sub>NMe<sub>2</sub>)<sub>3</sub>]PF<sub>6</sub>**

To an oven dried 250 mL two-neck round bottom flask equipped with a magnetic stir bar was added  $[\text{RuCl}_2(\text{cod})]_n$  (5.5 g) under  $\text{N}_2$ . To the flask were added degassed methanol (55 mL), degassed water (13.8 mL) and freshly distilled degassed *N,N*-dimethyl hydrazine (55 mL, 43 g, 0.72 mol,  $4 \times 10 \text{ eq.}$ ). The mixture was heated at  $95\text{ }^\circ\text{C}$  and stirred at the same temperature for 45 min. The resulting mixture was subsequently cooled to  $23\text{ }^\circ\text{C}$  over 60 min with stirring.

Under  $\text{N}_2$ , to the above reaction mixture was added a degassed solution of  $\text{NH}_4\text{PF}_6$  (5.5 g, 34 mmol, 2 eq.) in  $\text{H}_2\text{O}$  (55 mL). The slurry was kept at  $-20\text{ }^\circ\text{C}$  for 12 h under  $\text{N}_2$ .

The resulting colorless precipitate was filtered off with a sintered glass funnel under air to furnish a first crop of product. Then the filtrate was concentrated under reduced pressure to half of the volume and was then

kept at  $-20\text{ }^{\circ}\text{C}$  for 60 min. The resulting colorless precipitate was filtered off with a sintered glass funnel to afford a second crop of product, which was combined with the previous fraction. The combined colorless precipitate was washed thoroughly with ice-cold water (200 mL) and dried under vacuum for 48 h to afford [(cod)RuH(NH<sub>2</sub>NMe<sub>2</sub>)<sub>3</sub>]PF<sub>6</sub> (4.9 g). The material was used in subsequent steps without further purification.

### [CpRu(cod)Cl] (1)

**Caution:** This step involves the use of toxic CpTI reagent. Proper care is essential to safely carry out this reaction, and the appropriate disposal of the thallium-contaminated flask, celite, gloves, needles and other materials is of the utmost importance for the safety of the chemist, staff, and other personnel.

Inside a nitrogen-filled glovebox, a 250 mL two necked round bottom flask equipped with a magnetic stir-bar and a rubber septum was charged with [(cod)RuH(Me<sub>2</sub>NNH<sub>2</sub>)<sub>3</sub>]PF<sub>6</sub> (5.00 g) and thallium cyclopentadienide (2.78 g, 10.3 mmol). The flask was sealed with a second rubber septum and was brought outside the glovebox. Degassed acetone (88 mL) was added to the flask under N<sub>2</sub>. The mixture was heated at 65 °C and stirred at the same temperature for 30 min. The resulting mixture was subsequently cooled to 23 °C over 20 min. The mixture was transferred with a cannula into a Schlenck flask, sealed, and brought inside a glovebox (Note: a rubber septum alone can not withstand the pressure difference inside the antechamber and presents a significant spill hazard). The mixture was filtered through a pad of celite under vacuum. The resulting filtrate was concentrated *in vacuo* to afford a brown solid. Pentane (30 mL) was added to the brown solid and the mixture was shaken vigorously for 10 min. The resulting mixture was drawn into a 40 mL syringe and filtered through a 0.2 μm PTFE syringe filter into a separate 50 mL flask containing CCl<sub>4</sub> (1.93 mL). A yellow precipitate was immediately observed. The above sequence of pentane (30 mL) addition to the brown solid was repeated. The supernatant was filtered again and added to the CCl<sub>4</sub> containing flask, where yellow precipitate formed immediately, and the suspension was stirred inside a glove box for an additional 30 min. Then the suspension was removed from the glove box, and the yellow solid was filtered off with a sintered glass funnel under air. The resulting solid was washed with pentane (30 mL) and dried under vacuum to afford [CpRu(cod)Cl] (1.21 g, 3.27 mmol, 16 ± 1 % yield from RuCl<sub>3</sub>·x H<sub>2</sub>O) as a dark yellow solid.

### NMR Spectroscopy:

<sup>1</sup>H NMR (500 MHz, CDCl<sub>3</sub>, 23 °C, δ): 5.32–5.29 (m, 2H), 4.95 (s, 5H), 4.41–4.38 (m, 2H), 2.62–2.59 (m, 2H), 2.10–2.03 (m, 4H), 2.00–1.93 (m, 2H).<sup>3</sup>

<sup>13</sup>C NMR (125 MHz, CDCl<sub>3</sub>, 23 °C, δ): 128.8, 87.1, 85.9, 78.7, 32.6, 28.1, 28.0.

HRMS (m/z) calc'd for C<sub>13</sub>H<sub>17</sub>Ru [M-Cl]<sup>+</sup>, 275.0374; found, 275.0367.

Alkenyltriflate **S2**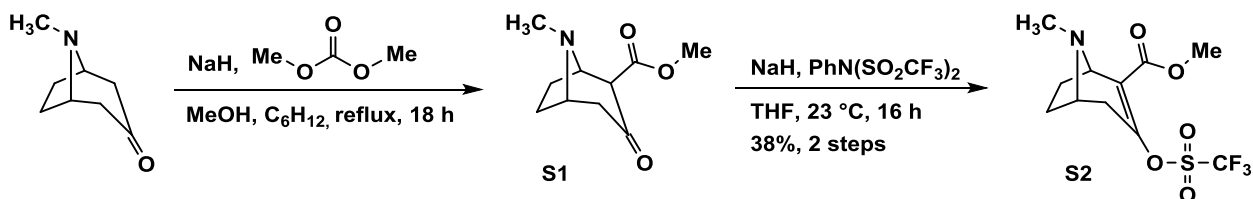

Sodium hydride (60% dispersion in mineral oil, 5.2 g, 0.13 mol, 3.0 eq.) was washed with anhydrous cyclohexane (2 × 30 mL) and dried *in vacuo* (0.2 millibar) for 12 h. To the dried sodium hydride were added anhydrous cyclohexane (24 mL) and dimethyl carbonate (20 g, 18 mL, 0.22 mol, 5.0 eq.) at 23 °C. Then, the mixture was heated at reflux. A solution of tropinone (6.0 g, 43 mmol, 1.0 eq.) in cyclohexane (41 mL, 1.0 M) was added dropwise over 20 min with a syringe pump while the solution was heated at reflux. Then MeOH (0.15 mL) was added with a syringe. The mixture was heated at reflux for 2 h until gas evolution ceased and subsequently was cooled to 23 °C. Water (60 mL) was added to the mixture and the layers were separated. The organic layer was washed with water (2 × 30 mL). The combined aqueous layers were saturated with solid ammonium chloride (40 g) and extracted with CH<sub>2</sub>Cl<sub>2</sub> (2 × 60 mL). The organic layer was dried over Na<sub>2</sub>SO<sub>4</sub> and concentrated under reduced pressure to afford 7.6 g of a brown material (**S1**) that was used without purification in the next step.

To a stirred solution of **S1** (7.6 g, 38 mmol, 1 eq.) in THF (0.20 L, 0.2 M) at 0 °C was added NaH (60% dispersion in mineral oil, 4.6 g, 0.11 mol, 3 eq.). The mixture was warmed from 0 °C to 23 °C over 10 min and stirred for 20 min at 23 °C. Then, the mixture was cooled to 0 °C and PhN(SO<sub>2</sub>CF<sub>3</sub>)<sub>2</sub> (68 g, 0.19 mmol, 5.0 eq.) was added portionwise over 15 min. Then, the reaction mixture was allowed to warm to 23 °C over 10 min. The reaction mixture was stirred at 23 °C for 16 h. The resulting solution was diluted with EtOAc (200 mL) and washed with brine (75 mL). The organic layer was dried over Na<sub>2</sub>SO<sub>4</sub> and concentrated under reduced pressure. The residue was purified by chromatography on silica gel eluting with hexanes in EtOAc 2:3 (v/v) to afford 5.40 g (16.4 mmol) of **S2** as a yellow oil (38% yield) over two-steps.

$R_f = 0.32$  (EtOAc in hexanes = 60%)

**NMR Spectroscopy:**

<sup>1</sup>H NMR (500 MHz, CDCl<sub>3</sub>, 23 °C, δ): 3.93 (d,  $J = 5.5$  Hz, 1H), 3.81 (s, 3H), 3.43–3.41 (m, 1H), 2.84 (dd,  $J = 18.5, 4.6$  Hz, 1H), 2.39 (s, 3H), 2.23–2.12 (m, 2H), 2.01–1.95 (m, 2H), 1.61–1.57 (m, 1H).

<sup>13</sup>C NMR (125 MHz, CDCl<sub>3</sub>, 23 °C, δ): 164.0, 149.2, 125.4, 118.4 (q,  $J = 318.8$  Hz), 60.3, 57.6, 52.3, 35.1, 34.9, 33.3, 30.2.

HRMS ( $m/z$ ) calc'd for C<sub>11</sub>H<sub>15</sub>F<sub>3</sub>NO<sub>5</sub>S [M+H]<sup>+</sup>, 330.0623; found, 330.0663.



The  $^1\text{H}$  and  $^{13}\text{C}$  NMR spectroscopic data correspond to the data reported in the literature.<sup>4</sup>

### Styrene **S3**

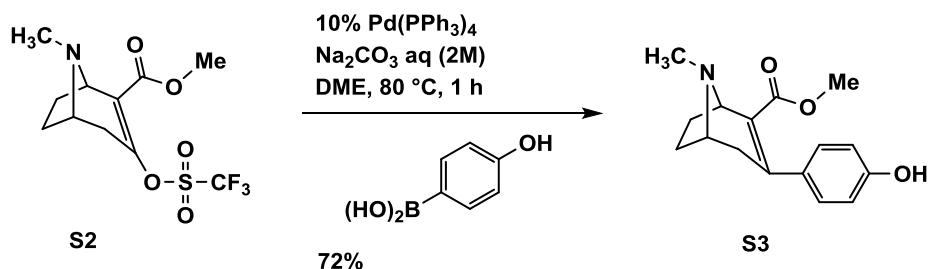

To a stirred solution of **S2** (6.3 g, 19 mmol, 1.0 eq.) in DME (0.14 mL,  $c = 0.14$  M) at 23 °C was added (4-hydroxyphenyl)boronic acid (3.2 g, 23 mmol, 1.2 eq.) and then aqueous  $\text{Na}_2\text{CO}_3$  solution (2.0 M, 17 mL, 34 mmol, 1.8 eq.). The mixture was stirred for 10 min at 23 °C and then  $\text{Pd}(\text{PPh}_3)_4$  (2.2 g, 1.9 mmol, 10. mol%) was added. The resulting mixture was heated at 80 °C and stirred for 1 h. Then, the solution was cooled to 23 °C and partitioned between EtOAc (100 mL) and  $\text{H}_2\text{O}$  (50 mL). The aqueous layer was extracted with EtOAc (2 × 100 mL). The combined organic layers were washed with brine (30 mL), dried over  $\text{Na}_2\text{SO}_4$  and concentrated under reduced pressure. The resulting brown liquid was purified by chromatography on silica gel eluting with MeOH in  $\text{CH}_2\text{Cl}_2$  5:95 (v/v) to afford 3.8 g (14 mmol) of **S3** as a light brown solid (72% yield).

$R_f = 0.24$  (MeOH in  $\text{CH}_2\text{Cl}_2 = 5\%$ ).

### NMR Spectroscopy:

$^1\text{H}$  NMR (500 MHz,  $\text{CD}_2\text{Cl}_2$ , 23 °C,  $\delta$ ): 7.11 (dd,  $J = 8.6, 5.3$  Hz, 2H), 6.99–7.02 (m, 2H), 3.77 (d,  $J = 5.5$  Hz, 1H), 3.46 (s, 3H), 3.46–3.43 (m, 1H), 3.30–3.32 (m, 1H), 2.70–2.75 (m, 1H), 2.39 (s, 3H), 2.21–2.10 (m, 2H), 2.09–2.03 (br s, 1H), 2.01–1.92 (m, 1H), 1.65–1.60 (m, 1H).

$^{13}\text{C}$  NMR (125 MHz,  $\text{CD}_2\text{Cl}_2$ , 23 °C,  $\delta$ ): 168.8, 157.0, 143.4, 132.7, 129.7, 128.7, 115.5, 61.3, 58.5, 51.8, 38.1, 36.3, 34.2, 30.1.

HRMS ( $m/z$ ) calc'd for  $\text{C}_{16}\text{H}_{20}\text{NO}_3$   $[\text{M}+\text{H}]^+$ , 274.1443; found, 274.1449.

**Phenol 3**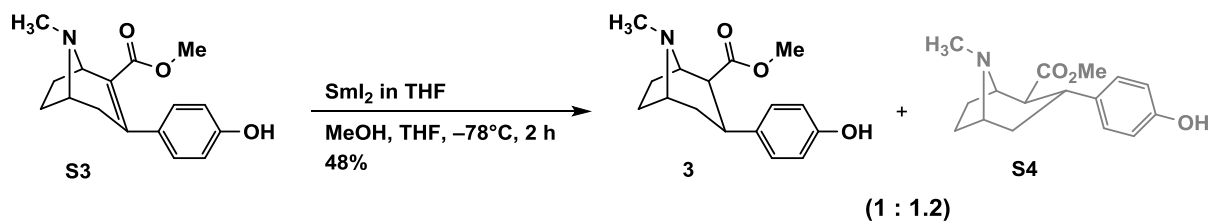

To a stirred solution of **S3** (1.00 g, 3.65 mmol, 1.00 eq.) in THF (12 mL) and MeOH (3.0 mL) at  $-78^\circ\text{C}$ ,  $\text{Sml}_2$  in THF ( $c = 0.1\text{ M}$ , 0.3 L, 0.03 mol, 8 eq.) was added drop-wise with a syringe pump over 60 min. The solution was stirred for 4 h at  $-78^\circ\text{C}$  and then water (120 mL) was added at  $-78^\circ\text{C}$ . The mixture was warmed to  $23^\circ\text{C}$  over 1 h and then saturated aqueous  $\text{NaHCO}_3$  solution (60 mL) was added. The resulting suspension was filtered through a celite pad to remove the precipitate and the celite pad was washed with EtOAc ( $2 \times 40\text{ mL}$ ). The layers of the filtrate were separated and the aqueous layer was extracted with EtOAc ( $2 \times 70\text{ mL}$ ). The combined organic layers were washed with brine (30 mL), dried over  $\text{Na}_2\text{SO}_4$  and was concentrated under reduced pressure to afford a dark brown liquid.  $^1\text{H NMR}$  analysis showed a 1:1.2 ratio of the desired compound **3** and the undesired compound **S4**. The product was purified by chromatography on silica gel eluting with MeOH in EtOAc 15:85 (v/v) to afford 0.48 g (1.7 mmol) of a mixture of **3** and **S4** as a yellow solid (48% yield).

**Compound 3**

$R_f = 0.25$  (MeOH in EtOAc = 15%)

**NMR Spectroscopy:**

$^1\text{H NMR}$  (500 MHz,  $\text{CD}_3\text{OD}$ ,  $23^\circ\text{C}$ ,  $\delta$ ): 7.05 (d,  $J = 8.2\text{ Hz}$ , 2H), 6.65 (d,  $J = 8.6\text{ Hz}$ , 2H), 3.61–3.59 (m, 1H), 3.46–3.43 (m, 1H), 3.43 (s, 3H), 3.13–3.07 (m, 1H), 2.93–2.92 (m, 1H), 2.56–2.51 (m, 1H), 2.31 (s, 3H), 2.28–2.25 (m, 1H), 2.21–2.14 (m, 1H), 1.92–1.86 (m, 1H), 1.80–1.75 (m, 1H), 1.72–1.67 (m, 1H).

$^{13}\text{C NMR}$  (125 MHz,  $\text{CD}_3\text{OD}$ ,  $23^\circ\text{C}$ ,  $\delta$ ): 174.3, 156.7, 134.1, 129.4, 115.8, 66.3, 63.9, 53.5, 51.6, 41.7, 34.9, 33.9, 26.5, 25.4.

**HRMS** ( $m/z$ ) calc'd for  $\text{C}_{16}\text{H}_{22}\text{NO}_3$   $[\text{M}+\text{H}]^+$ , 276.1600; found, 276.1631.

**Compound S4**

$R_f = 0.52$  (MeOH in EtOAc = 20%)

**NMR Spectroscopy:**

**$^1\text{H}$  NMR** (500 MHz,  $\text{CD}_3\text{OD}$ , 23 °C,  $\delta$ ): 7.01 (d,  $J$  = 8.5 Hz, 2H), 6.65 (d,  $J$  = 8.6 Hz, 2H), 3.52 (s, 3H), 3.34 (d,  $J$  = 6.65 Hz, 1H), 3.24–3.22 (m, 1H), 3.19–3.14 (m, 1H), 2.54–2.52 (m, 1H), 2.36–2.31 (m, 1H), 2.28 (s, 3H), 2.26–2.21 (m, 1H), 2.25–2.09 (m, 1H), 1.67–1.61 (m, 1H), 1.58–1.52 (m, 1H), 1.47–1.42 (m, 1H).

**$^{13}\text{C}$  NMR** (125 MHz,  $\text{CD}_3\text{OD}$ , 23 °C,  $\delta$ ): 175.4, 155.5, 134.1, 128.1, 114.7, 63.1, 59.6, 55.8, 50.8, 39.6, 38.3, 34.9, 27.9, 27.7.

**HRMS (m/z)** calc'd for  $\text{C}_{16}\text{H}_{22}\text{NO}_3$   $[\text{M}+\text{H}]^+$ , 276.1600; found, 276.1662.

### **$[(\eta^6\text{-}3,4,5\text{-Trimethylphenol})\text{RuCp}]\text{Cl}$ (**5**)**

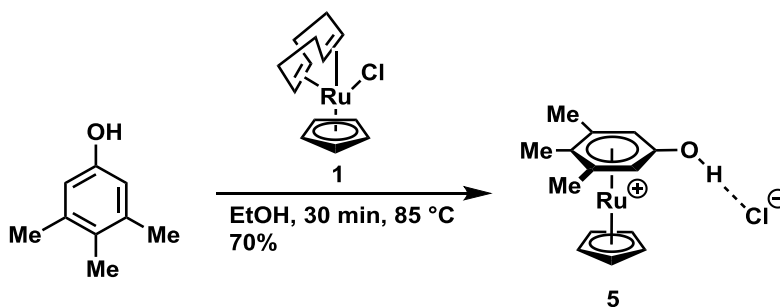

3,4,5-Trimethylphenol (16 mg, 0.12 mmol, 1.0 eq.) and  $[\text{CpRu}(\text{cod})\text{Cl}]$  (**1**) (36 mg, 0.12 mmol, 1.0 eq.) were added to EtOH (50  $\mu\text{L}$ ,  $c$  = 4.8 M) in a 0.5 dram (1.8 mL) borosilicate glass vial. The vial was capped and the reaction mixture was stirred at an oil bath temperature of 85 °C (heating block temperature) for 30 min, then cooled to 23 °C. EtOH was evaporated under reduced pressure. Then the light red residue was washed with diethyl ether ( $2 \times 200 \mu\text{L}$ ) followed by cold acetonitrile (0 °C,  $2 \times 100 \mu\text{L}$ ). The remaining solid was dried under vacuum (0.2 millibar) for 2 h, which afforded 29 mg (83  $\mu\text{mol}$ ) of **5** as a colorless solid (70%).

**Crystal growth of 5:** Complex **5** (20 mg, 59  $\mu\text{mol}$ ) was dissolved in methylene chloride (200  $\mu\text{L}$ ) and then diethyl ether (ca. 200  $\mu\text{L}$ ) was slowly added until the solution became cloudy. Then, the mixture was filtered through a glass microfibre filter and then the eluent was slowly cooled to  $-15$  °C and kept for 12 h at  $-15$  °C. Single crystals of **5** were formed at the bottom and on the wall of the vial. Crystals of **5** were harvested from the wall of the vial with a crystallography needle for single crystal analysis.

### **NMR Spectroscopy:**

**$^1\text{H}$  NMR** (500 MHz,  $\text{CDCl}_3$ , 23 °C,  $\delta$ ): 6.45 (s, 2H), 5.06 (s, 5H), 2.34 (s, 6H), 2.24 (s, 3H).

**$^{13}\text{C}$  NMR** (126 MHz,  $\text{CDCl}_3$ , 23 °C,  $\delta$ ): 132.5, 99.0, 96.0, 80.0, 77.7, 20.3, 15.3.

**HRMS (m/z)** calc'd for  $\text{C}_{14}\text{H}_{17}\text{ORu}$   $[\text{M}-\text{Cl}]^+$ , 303.0317; found, 303.0319.

**Elemental Analysis** calc'd for C<sub>14</sub>H<sub>17</sub>ClORu: C, 49.78; H, 5.07; found: C, 49.65; H, 5.01.

### Methylpiperazin **S5**

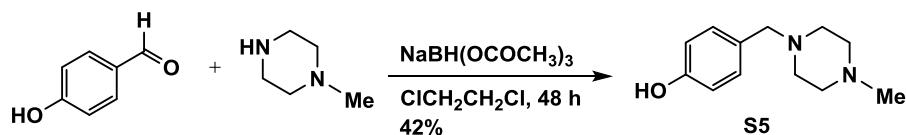

To a stirred solution of 4-hydroxybenzaldehyde (100 mg, 810  $\mu$ mol, 1.00 eq.) in 1,2-dichloroethane (4.0 mL,  $c = 0.20$  M) at 0  $^{\circ}$ C was added 1-methylpiperazine (81.1 mg, 90.0  $\mu$ L, 810  $\mu$ mol, 1.00 eq.) and NaBH(OCOCH<sub>3</sub>)<sub>3</sub> (264 mg, 1.24 mmol, 1.50 eq.). The mixture was warmed to 23  $^{\circ}$ C and stirred at 23  $^{\circ}$ C for 48 h. The resulting solution was concentrated under reduced pressure and then the residue was taken up in ethyl acetate (20 mL). The solution was washed with water (10 mL) and then with brine (5 mL). The organic layer was dried over Na<sub>2</sub>SO<sub>4</sub> and concentrated under reduced pressure, which was purified by chromatography on silica gel eluting with MeOH/EtOAc/Et<sub>3</sub>N 9:1:0.5 to afford 71 mg (0.34 mmol) of **S5** as a colorless solid (42% yield).

$R_f = 0.31$  (MeOH in EtOAc = 10%, with 5% NEt<sub>3</sub>)

### NMR Spectroscopy:

<sup>1</sup>H NMR (500 MHz, CD<sub>3</sub>OD, 23  $^{\circ}$ C,  $\delta$ ): 7.15–7.13 (m, 2H), 6.76–6.73 (m, 2H), 3.45 (s, 2H), 2.49 (br s, 8H), 2.29 (s, 3H).

<sup>13</sup>C NMR (125 MHz, CD<sub>3</sub>OD, 23  $^{\circ}$ C,  $\delta$ ): 157.9, 132.0, 128.7, 116.0, 63.3, 55.6, 53.3, 45.9.

**HRMS (m/z)** calc'd for C<sub>12</sub>H<sub>19</sub>N<sub>2</sub>O [M+H]<sup>+</sup>, 207.1497; found, 207.1545.

### [( $\eta^6$ -5-Fluoro-1,2,3-trimethylbenzene)RuCp]Cl (**6**)

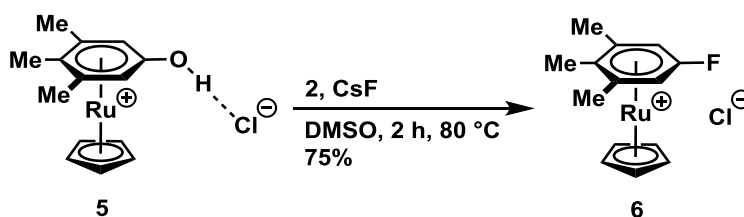

In an N<sub>2</sub>-filled glovebox, an oven-dried vial was charged with Chloroimidazolium chloride **2** (32 mg, 69  $\mu$ mol, 1.1 eq.), previously dried (200  $^{\circ}$ C, 24 h) CsF (19 mg, 0.13 mmol, 2.0 eq.) and complex **5** (20. mg, 60  $\mu$ mol, 1.0 eq.). Dry DMSO (0.2 mL) was added to the vial and the vial was sealed, then removed from the glovebox. Then the reaction mixture was stirred at 80  $^{\circ}$ C for 2 h and subsequently cooled to 23  $^{\circ}$ C. Then, the reaction

mixture was filtered through a glass frit. The residue on the glass frit was washed with DMSO (0.3 mL). The filtrate was concentrated *in vacuo* (0.2 millibar) at 40 °C over 6 h and then the residue was washed with diethyl ether (2 x 0.5 mL). The residue was then redissolved in MeCN (0.1 mL) and then diethyl ether (0.5 mL) was slowly added, which resulted in the formation of a suspension. The supernatant was decanted and then the colorless solid was washed with diethyl ether (0.5 mL) and dried *in vacuo* (0.2 millibar) for 2 h, which afforded 16 mg (45  $\mu$ mol) of **6** as a colorless solid (75% yield).

**Crystal growth of 6:** Complex **6** (10 mg, 29  $\mu$ mol) was dissolved in methylene chloride (200  $\mu$ L) and then diethyl ether (ca. 100  $\mu$ L) was slowly added until the solution became cloudy. Then, the mixture was filtered through a glass microfibre filter and the filtrate was slowly cooled to -15 °C and kept over night at -15 °C. Single crystals of **6** formed at the bottom of the vial. Crystals of **6** were harvested with a crystallography needle for single crystal analysis.

#### NMR Spectroscopy:

<sup>1</sup>H NMR (500 MHz, CD<sub>2</sub>Cl<sub>2</sub>, 23 °C,  $\delta$ ): 6.6 (d,  $J$  = 3.5 Hz, 2H), 5.4 (s, 5H), 2.53 (s, 6H), 2.37 (s, 3H).

<sup>13</sup>C NMR (126 MHz, CD<sub>2</sub>Cl<sub>2</sub>, 23 °C,  $\delta$ ): 135.2 (d, <sup>1</sup> $J_{CF}$  = 276.3 Hz), 101.3 (d, <sup>4</sup> $J_{CF}$  = 3.4 Hz), 100.7 (d, <sup>3</sup> $J_{CF}$  = 6.3 Hz), 82.69, 78.62 (d, <sup>2</sup> $J_{CF}$  = 20.3 Hz), 20.2, 15.7.

HRMS ( $m/z$ ) calc'd for C<sub>14</sub>H<sub>16</sub>FRu [M-Cl]<sup>+</sup>, 305.0274; found, 305.0274.

Elemental Analysis calc'd for C<sub>14</sub>H<sub>16</sub>ClFRu: C, 49.49; H, 4.75; found: C, 49.65; H, 4.62.

#### Methoxyaniline S6

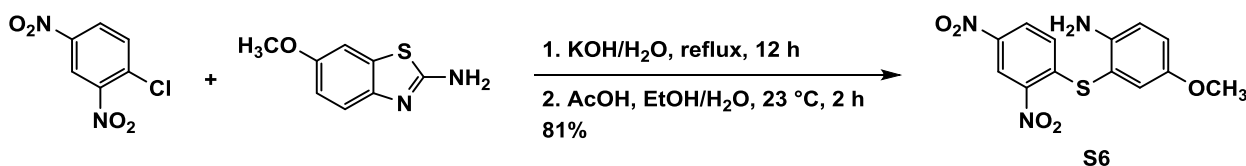

To an aqueous solution of potassium hydroxide (100 mL, 50% w/w) was added 6-methoxybenzo[*d*]-thiazol-2-amine (5.00 g, 27.7 mmol, 1.10 eq.) at 23 °C. The reaction mixture was heated at reflux and stirred for 12 h. Then, the solution was cooled to 23 °C. The solution was added drop-wise over 30 min with syringe to a stirred solution of 1-chloro-2,4-dinitrobenzene (5.10 g, 25.2 mmol, 1.00 eq.) in ethanol (200 mL)/acetic acid (500 mL) at 0 °C. The mixture was warmed to 23 °C and stirred for 2 h. The resulting precipitate was filtered off with a Büchner funnel with a fritted disc and washed with water (100 mL) followed by ethanol (100 mL). The product was dried under vacuum to afford 6.55 g (20.4 mmol) of **S6** as a yellow solid (81% yield).

R<sub>f</sub> = 0.85 (EtOAc in hexanes = 50%)

**NMR Spectroscopy:**

**<sup>1</sup>H NMR** (500 MHz, CDCl<sub>3</sub>, 23 °C, δ): 9.12 (d, *J* = 2.4 Hz, 1H), 8.18 (dd, *J* = 9.0, 3.0 Hz, 1H), 7.05 (d, *J* = 8.9 Hz, 1H), 7.01 (dd, *J* = 8.8, 3.0 Hz, 1H), 6.97 (d, *J* = 2.8 Hz, 1H), 6.85 (d, *J* = 8.8 Hz, 1H), 4.02 (br s, 2H), 3.76 (s, 3H).

**<sup>13</sup>C NMR** (125 MHz, CDCl<sub>3</sub>, 23 °C, δ): 153.1, 146.0, 144.8, 144.6, 143.5, 128.8, 127.3, 121.9, 120.8, 120.6, 117.7, 111.1, 56.0.

**HRMS (m/z)** calc'd for C<sub>13</sub>H<sub>12</sub>N<sub>3</sub>O<sub>5</sub>S [M+H]<sup>+</sup>, 322.0498; found, 322.0482.

The <sup>1</sup>H NMR spectroscopic data correspond to the data reported in the literature.<sup>5</sup>

**1-(4-Fluorobenzyl)-4-methylpiperazine ([<sup>19</sup>F]7b)**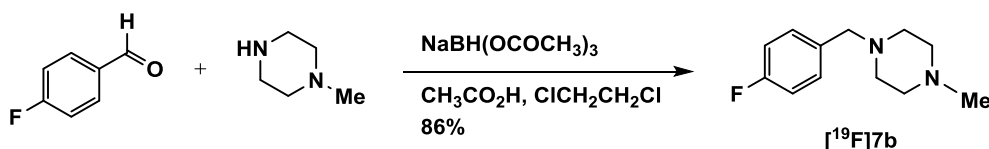

To a stirred solution of 4-fluorobenzaldehyde (86 μL, 0.10 g, 0.80 mmol, 1.1 eq.) in 1,2-dichloroethane (1.2 mL, *c* = 0.67 M) at 23 °C was added 1-methylpiperazine (0.81 mL, 0.73 g, 0.73 mmol, 1.0 eq.) in one portion. To the solution was added acetic acid (0.46 mL, 0.49 g, 0.80 mmol, 1.0 eq.), and the solution was stirred for 2 h at 23 °C. To the resulting mixture was added NaBH(OCOCH<sub>3</sub>)<sub>3</sub> (0.26 mg, 1.2 mmol, 1.5 eq.) at 23 °C and the reaction mixture was stirred for 24 h. The reaction was quenched by dropwise addition of saturated aqueous NaHCO<sub>3</sub> solution (15 mL). The layers were separated and the aqueous layer was washed with ethyl acetate (3 × 10 mL). The combined organic layers were washed with brine (10 mL) and dried over Na<sub>2</sub>SO<sub>4</sub>, concentrated to dryness and the product purified by preparative thin-layer chromatography eluting with MeOH/CH<sub>2</sub>Cl<sub>2</sub>/NH<sub>4</sub>OH = 9:1:0.1 (v/v) to afford 130 mg (624 μmol) of [<sup>19</sup>F]7b as a colorless solid (86% yield).

*R<sub>f</sub>* = 0.61 (MeOH in CH<sub>2</sub>Cl<sub>2</sub> = 10% with 1% NH<sub>4</sub>OH added)

**NMR Spectroscopy:**

**<sup>1</sup>H NMR** (500 MHz, CDCl<sub>3</sub>, 23 °C, δ): 7.32 (dd, *J* = 8.4, 5.6 Hz, 2H), 7.04–7.08 (m, 2H), 3.48 (s, 2H), 2.46 (br s, 8H), 2.25 (s, 3H).

**<sup>13</sup>C NMR** (125 MHz, CDCl<sub>3</sub>, 23 °C, δ): 163.5 (d, *J* = 291 Hz), 134.5, 132.3, 115.9 (d, *J* = 25 Hz), 62.8, 55.7, 53.4, 46.0.

**<sup>19</sup>F NMR** (376 MHz, CDCl<sub>3</sub>, 23 °C, δ): –116.0.

HRMS (m/z) calc'd for C<sub>12</sub>H<sub>18</sub>FN<sub>2</sub> [M+H]<sup>+</sup>, 209.1454; found, 209.1498.

### 3-Fluoro-carbazole [<sup>19</sup>F]7f

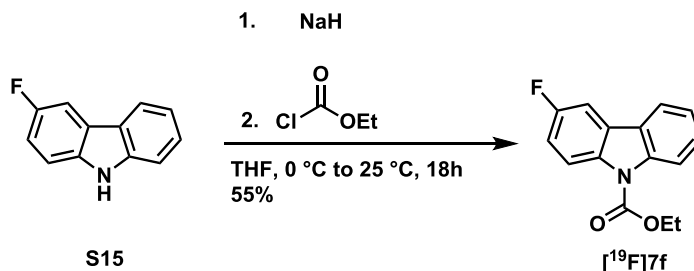

To a stirred solution of 3-fluoro-9H-carbazole (**S15**) (50 mg, 0.27 mmol, 1.0 eq.) in dry THF (0.70 mL, c = 0.39 M) at 0 °C was added sodium hydride (60% dispersion in mineral oil, 32 mg, 0.80 mmol, 3.0 eq.), and the reaction mixture was stirred for 30 min at 0 °C. Then, ethyl chloroformate (0.13 mL, 0.15 g, 1.4 mmol, 5.2 eq.) was added. The reaction mixture was then allowed to warm to 23 °C and stirred for 18 h at 23 °C. Then, methanol (1 mL) was added, and the reaction mixture was filtered through a pad of celite. The filter cake was washed with methanol (1 mL). The filtrate was concentrated *in vacuo*, and the product was purified by preparative TLC (hexanes/ethyl acetate 85:15 (v/v)) to afford 39 mg (0.15 mmol) of [<sup>19</sup>F]7f as a colorless solid compound (55% yield).

R<sub>f</sub> = 0.66 (EtOAc in hexanes = 15%)

#### NMR Spectroscopy:

<sup>1</sup>H NMR (500 MHz, CDCl<sub>3</sub>, 23 °C, δ): 8.30–8.25 (m, 2H), 7.91 (ddd, *J* = 7.8, 1.3, 1.0 Hz, 1H), 7.61 (dd, *J* = 8.2, 2.6 Hz, 1H), 7.50 (ddd, *J* = 8.5, 7.3, 1.3 Hz, 1H), 7.36 (td, *J* = 7.5, 1.0 Hz, 1H), 7.18 (td, *J* = 9.0, 2.7 Hz, 1H), 4.60 (q, *J* = 7.1 Hz, 2H), 1.56 (t, *J* = 7.1 Hz, 3H).

<sup>13</sup>C NMR (126 MHz, CDCl<sub>3</sub>, 23 °C, δ): 159.5 (d, *J* = 241.0 Hz), 152.2, 139.0, 134.5, 127.8, 127.1 (d, *J* = 9.5 Hz), 125.3 (d, *J* = 3.6 Hz), 123.3, 120.0, 117.4 (d, *J* = 8.7 Hz), 116.5, 114.4 (d, *J* = 24.3 Hz), 105.7 (d, *J* = 24.0 Hz), 63.2, 14.5.

<sup>19</sup>F NMR (471 MHz, CDCl<sub>3</sub>, 23 °C, δ): -119.8.

HRMS (m/z) calc'd for C<sub>15</sub>H<sub>13</sub>FNO<sub>2</sub> [M+H]<sup>+</sup>, 258.0930; found, 258.0925.

**3- Fluoro-7-nitro-phenothiazin [<sup>19</sup>F]7g**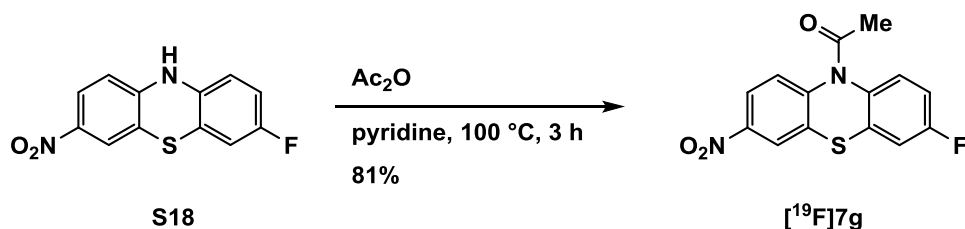

To a stirred solution of **S18** (0.15 g, 0.57 mmol, 1.0 eq.) in pyridine (0.68 mL, *c* = 0.83 M) was added acetic anhydride (3.4 mL, 3.6 g, 36 mmol, 63 eq.) at 0 °C. The reaction mixture was heated to 100 °C and stirred at the same temperature for 2 h. The resulting mixture was then poured into 20 mL of ice-cold water. The aqueous and organic layers were separated, the aqueous layer was extracted with ethyl acetate (3 × 10 mL) and the combined organic layers were washed with water (10 mL) and then with brine (10 mL). The organic layer was dried over Na<sub>2</sub>SO<sub>4</sub> and concentrated under reduced pressure. The product was purified with chromatography on silica gel eluting with ethyl acetate in hexane 1:4 (v/v) to afford 0.14 g (0.46 mmol) of [<sup>19</sup>F]**7g** as a brown solid (81%).

*R<sub>f</sub>* = 0.52 (EtOAc in hexanes = 30%)

**NMR Spectroscopy:**

<sup>1</sup>H NMR (500 MHz, CDCl<sub>3</sub>, 23 °C, δ): 8.28 (d, *J* = 2.5 Hz, 1H), 8.18 (dd, *J* = 8.7, 2.5 Hz, 1H), 7.67 (d, *J* = 8.8 Hz, 1H), 7.41 (dd, *J* = 8.7, 5.5 Hz, 1H), 7.24 (dd, *J* = 8.9, 2.5 Hz, 1H), 7.05 (td, *J* = 8.3, 2.6 Hz, 1H), 2.27 (s, 3H).

<sup>13</sup>C NMR (125 MHz, CDCl<sub>3</sub>, 23 °C, δ): 168.7, 163.2, 161.2, 145.1 (d, *J* = 247.3 Hz), 139.5 (d, *J* = 10.3 Hz), 135.0, 129.2 (d, *J* = 9.3 Hz), 128.0, 127.1 (d, *J* = 3.2 Hz), 123.2, 122.4, 115.2 (d, *J* = 22.5 Hz), 115.0 (d, *J* = 24.8 Hz), 23.2.

<sup>19</sup>F NMR (376 MHz, CDCl<sub>3</sub>, 23 °C, δ): -112.6.

**HRMS (m/z)** calc'd for C<sub>14</sub>H<sub>9</sub>FN<sub>2</sub>O<sub>3</sub>SNa [M+Na]<sup>+</sup>, 327.0216; found, 327.0216.



Hydroxypropylazetidin [<sup>19</sup>F]7h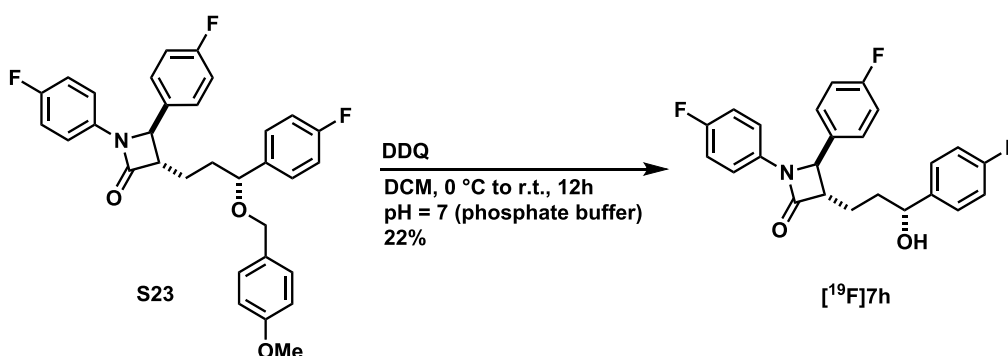

An oven-dried 5 mL glass vial was charged with a magnetic stir bar and dichloromethane (1.0 mL) and was cooled to 0 °C. PMB ether **S23** (60 mg, 0.11 mmol, 1.0 eq.) and phosphate buffer solution (0.1 mL, (c = 0.01 M NaH<sub>2</sub>PO<sub>4</sub> and c = 6.2 mM Na<sub>2</sub>HPO<sub>4</sub>) (pH = 7.1 at 0 °C, pH = 7.0 at 25 °C)) were added to the vial. Then, 2,3-dichloro-5,6-dicyano-1,4-benzoquinone (DDQ) (51 mg, 0.23 mmol, 2.1 eq.) was added portionwise to the stirred solution over 10 min. The reaction mixture was then stirred for 12 h at 23 °C. The product was extracted with dichloromethane (10 mL), the organic phase was washed with water (2 × 2 mL) and then was dried with anhydrous Mg<sub>2</sub>SO<sub>4</sub>, filtered and concentrated under reduced pressure. The resulting residue was purified by preparative TLC (hexanes:ethyl acetate 85:15 (v/v)) to give 11 mg (27 μmol) of [<sup>19</sup>F]7h as a colorless oil (22% yield).

R<sub>f</sub> = 0.25 (EtOAc in hexanes = 15%)

**NMR Spectroscopy:**

**<sup>1</sup>H NMR** (600 MHz, CDCl<sub>3</sub>, 23 °C, δ): 7.29 (ddd, *J* = 8.8, 5.3, 3.1 Hz, 4H), 7.21 (dd, *J* = 9.0, 4.6 Hz, 2H), 7.05–7.09 (m, 2H), 7.00–7.04 (m, 2H), 6.91–6.95 (m, 2H), 4.72 (dd, *J* = 7.3, 5.1 Hz, 1H), 4.61 (d, *J* = 2.3 Hz, 1H), 3.07 (d, *J* = 7.5, 2.4 Hz, 1H), 1.99–2.04 (m, 2H), 1.93–1.98 (m, 2H).

**<sup>13</sup>C NMR** (126 MHz, CDCl<sub>3</sub>, 23 °C, δ): 167.3, 162.7 (d, *J* = 247.8 Hz), 162.2 (d, *J* = 245.7 Hz), 159.1 (d, *J* = 243.7 Hz), 140.0 (d, *J* = 2.9 Hz), 133.7 (d, *J* = 2.8 Hz), 133.3 (d, *J* = 3.1 Hz), 127.6 (d, *J* = 8.2 Hz), 127.4 (d, *J* = 8.1 Hz), 118.3 (d, *J* = 7.7 Hz), 116.3 (d, *J* = 21.6 Hz), 115.9 (d, *J* = 22.6 Hz), 115.4 (d, *J* = 21.5 Hz), 73.1, 60.8, 60.5, 36.6, 25.1.

**<sup>19</sup>F NMR** (376 MHz, CDCl<sub>3</sub>, 23 °C, δ): –112.8, –114.8, –117.8.

**HRMS (m/z)** calc'd for C<sub>24</sub>H<sub>21</sub>F<sub>3</sub>NO<sub>2</sub> [M+H]<sup>+</sup>, 412.1524; found, 412.1519.

***N*-(4-Fluorophenyl)benzamide** ( $[^{19}\text{F}]\mathbf{7j}$ )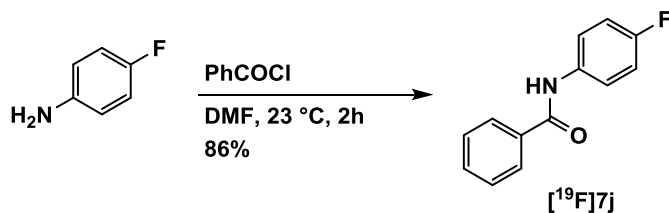

To a stirred solution of 4-fluoroaniline (85.3  $\mu\text{L}$ , 100 mg, 890  $\mu\text{mol}$ , 1.00 eq.) in DMF (0.45 mL,  $c = 1.9$  M) at 0  $^\circ\text{C}$  was added benzoyl chloride (100  $\mu\text{L}$ , 125 mg, 890  $\mu\text{mol}$ , 1.00 eq.) drop-wise with a syringe over 10 min. The solution was warmed to 23  $^\circ\text{C}$  over 30 min and was stirred for 2 h. Then aqueous NaOH solution (1.5 mL,  $c = 1.0$  M) was added to the solution to adjust the pH to 7. The resulting solution was added to ice-cold water (10 mL) dropwise with a syringe over 10 min. The resulting precipitate was filtered off with a Büchner funnel and dried *in vacuo* to afford 0.17 g (0.79 mmol) of  $[^{19}\text{F}]\mathbf{7j}$  as an off-white solid (86% yield).

$R_f = 0.65$  (EtOAc in hexanes = 30%)

**NMR Spectroscopy:**

$^1\text{H}$  NMR (500 MHz,  $\text{CD}_3\text{OD}$ , 23  $^\circ\text{C}$ ,  $\delta$ ): 7.90 (d,  $J = 7.1$  Hz, 1H), 7.67 (dd,  $J = 9.2, 4.9$  Hz, 2H), 7.56 (t,  $J = 7.5$  Hz, 2H), 7.49 (t,  $J = 7.5$  Hz, 2H), 7.07 (t,  $J = 8.9$  Hz, 2H).

$^{13}\text{C}$  NMR (125 MHz,  $\text{CD}_3\text{OD}$ , 23  $^\circ\text{C}$ ,  $\delta$ ): 168.8, 161.0 (d,  $J = 241$  Hz), 136.1, 136.0 (d,  $J = 2.7$  Hz), 132.9, 129.6, 128.6, 124.2 (d,  $J = 7.9$  Hz), 116.2 (d,  $J = 22.5$  Hz).

$^{19}\text{F}$  NMR (376 MHz,  $\text{CD}_3\text{OD}$ , 23  $^\circ\text{C}$ ,  $\delta$ ): -123.2.

HRMS ( $m/z$ ) calc'd for  $\text{C}_{13}\text{H}_{10}\text{FNONa}$   $[\text{M}+\text{Na}]^+$ , 238.0644; found, 238.0665.

**Purin**  $[^{19}\text{F}]\mathbf{7l}$ 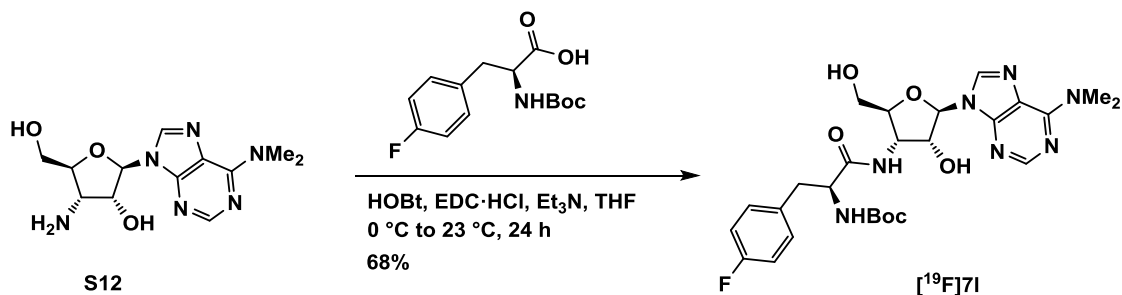

To a stirred solution of Boc-*L*-3-fluorophenylalanine (17 mg, 60  $\mu\text{mol}$ , 1.0 eq.) in THF (0.70 mL,  $c = 0.086$  M) at 0  $^\circ\text{C}$  was added a solution of puromycin aminonucleoside (**S12**) (20 mg, 68  $\mu\text{mol}$ , 1.1 eq.) in THF (0.7 mL,

c = 0.1 M) in one-portion. Subsequently, 1-hydroxybenzotriazole (HOBT, 9.2 mg, 68  $\mu$ mol, 1.1 eq.), 1-ethyl-3-(3-dimethylaminopropyl)carbodiimide hydrochloride (EDC·HCl, 23 mg, 0.12 mmol, 2.0 eq.), and triethyl amine (Et<sub>3</sub>N, 40 ml, 29 mg, 0.29 mmol, 4.8 eq.) were added to the solution at 0 °C. The mixture was then stirred for 12 h at 23 °C. The resulting solution was diluted with ethyl acetate (10 mL) and filtered through a celite pad. The filtrate was washed with aqueous HCl solution (2 mL, c = 1.0 M), H<sub>2</sub>O (1 mL) and then with brine (1 mL). The organic layer was dried over Na<sub>2</sub>SO<sub>4</sub> and concentrated under reduced pressure, which was purified by chromatography on silica gel eluting with MeOH/CH<sub>2</sub>Cl<sub>2</sub> 5:95 (v/v) to afford 23 mg (41  $\mu$ mol) of [<sup>19</sup>F]**7I** as a colorless solid (68% yield).

R<sub>f</sub> = 0.49 (MeOH in CH<sub>2</sub>Cl<sub>2</sub> = 5%)

### NMR Spectroscopy:

**<sup>1</sup>H NMR** (500 MHz, CD<sub>2</sub>Cl<sub>2</sub>: CD<sub>3</sub>OD 1:1, calibrated to CD<sub>2</sub>Cl<sub>2</sub> peak, 23 °C,  $\delta$ ): 8.21 (s, 1H), 8.16 (s, 1H), 7.17 (dd, *J* = 5.4 Hz, *J* = 8.6 Hz, 2H), 6.97 (t, *J* = 8.7 Hz, 2H), 5.82 (d, *J* = 2.2 Hz, 1H), 4.47 (d, *J* = 4.5 Hz, 2H), 4.27–4.25 (m, 1H), 4.02–4.01 (m, 1H), 3.96 (br s, 1H), 3.85 (d, *J* = 12.5 Hz, 1H), 3.57 (d, *J* = 11.9 Hz, 1H), 3.45 (br s, 6H), 3.02–2.98 (m, 1H), 2.86–2.82 (m, 1H), 1.32 (s, 9H).

**<sup>13</sup>C NMR** (125 MHz, CD<sub>2</sub>Cl<sub>2</sub>: CD<sub>3</sub>OD 1:1, calibrated to CD<sub>2</sub>Cl<sub>2</sub>, 23 °C,  $\delta$ ): 178.8, 168.7, 160.7, 157.4, 154.8, 143.5, 138.7, 136.6 (d, *J* = 7.7 Hz), 126.3, 120.8, 120.6, 96.6, 89.6, 85.6, 79.6, 66.8, 61.9, 56.3, 43.8, 43.1, 33.4.

**<sup>19</sup>F NMR** (471 MHz, CD<sub>2</sub>Cl<sub>2</sub>: CD<sub>3</sub>OD 1:1, 23 °C,  $\delta$ ): -115.5.

**HRMS (m/z)** calc'd for C<sub>26</sub>H<sub>36</sub>FN<sub>7</sub>O<sub>6</sub> [M+H]<sup>+</sup>, 560.2633; found, 560.2666.

### Fluoro-*L*-tyrosinate [<sup>19</sup>F]**7n**

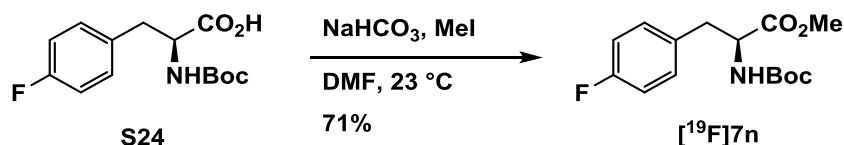

To a stirred solution of **S24** (0.10 g, 0.35 mmol, 1.0 eq.) in DMF (1.4 mL, c = 0.25 M) at 23 °C was added sodium bicarbonate (60 mg, 0.71 mmol, 2.0 eq.). The mixture was stirred for 10 min at 23 °C and subsequently cooled to 0 °C. To the ice-cold solution was added methyl iodide (0.11 mL, 0.25 g, 1.8 mmol, 5.0 eq.) dropwise with a syringe over 10 min. The reaction mixture was stirred for 12 h allowing the temperature to rise to 23 °C. The mixture was poured into water (5 mL) and extracted with ethyl acetate (3  $\times$  10 mL). The organic layer was washed with brine (10 mL) and dried over Na<sub>2</sub>SO<sub>4</sub>. The organic layer was concentrated and the product was purified by preparative thin-layer chromatography plate eluting with ethyl

acetate in hexanes 1:4 (v/v) to give 0.075 g (0.25 mmol) of [ $^{19}\text{F}$ ]7n as a colorless solid compound (71% yield).

$R_f$  = 0.67 (EtOAc in hexanes = 20%)

#### NMR Spectroscopy:

$^1\text{H}$  NMR (500 MHz,  $\text{CDCl}_3$ , 23 °C,  $\delta$ ): 7.08–7.06 (m, 2H), 6.96 (t,  $J$  = 8.5 Hz, 2H), 5.02–5.01 (m, 1H), 4.57–4.53 (m, 1H), 3.69 (s, 3H), 3.10–2.96 (m, 2H), 1.39 (s, 9H).

$^{13}\text{C}$  NMR (125 MHz,  $\text{CDCl}_3$ , 23 °C,  $\delta$ ): 172.2, 162.0 (d,  $^1J_{\text{CF}}$  = 243 Hz), 154.9, 131.7, 130.8 (d,  $^3J_{\text{CF}}$  = 7.9 Hz), 115.4 (d,  $J$  = 21.2 Hz), 79.9, 54.4, 52.2, 37.6, 28.2.

$^{19}\text{F}$  NMR (376 MHz,  $\text{CDCl}_3$ , 23 °C,  $\delta$ ): -115.9.

HRMS (m/z) calc'd for  $\text{C}_{15}\text{H}_{20}\text{FNO}_4\text{Na}$  [ $\text{M}+\text{Na}$ ] $^+$ , 320.1274; found, 320.1269.

#### Ethyl 4-fluoro-1*H*-indole-1-carboxylate ([ $^{19}\text{F}$ ]7o)

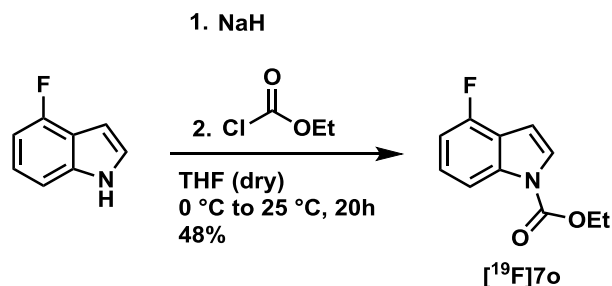

To a stirred solution of 4-fluoro-1*H*-indole (55 mg, 0.41 mmol, 1.0 eq.) in dry THF (0.80 mL,  $c$  = 0.51 M) at 0 °C was added sodium hydride (60% dispersion in mineral oil, 20. mg, 0.50 mmol, 1.2 eq.). The reaction mixture was stirred at 0 °C for 30 min. Then, ethyl chloroformate (0.10 mL, 0.11 g, 1.0 mmol, 3.9 eq.) was added to the reaction mixture at 0 °C. The reaction mixture was stirred for 20 h at 23 °C. Then, methanol (1 mL) was added to the reaction mixture, and the reaction mixture was filtered through a pad of celite and the celite was washed with methanol (1 mL). The filtrate was concentrated under reduced pressure, and the product was purified by preparative TLC (hexanes/ethyl acetate 90:10 (v/v)) to give 41 mg (0.20 mmol) of [ $^{19}\text{F}$ ]7o as a pale yellow oil (48% yield).

$R_f$  = 0.76 (EtOAc in hexanes = 10%)

#### NMR Spectroscopy:

$^1\text{H}$  NMR (600 MHz,  $\text{C}_6\text{D}_6$ , 23 °C,  $\delta$ ): 8.18 (br s, 1H), 7.25 (br s, 1H), 7.00–6.97 (m, 1H), 6.80 (dd,  $J$  = 9.7, 8.0 Hz, 1H), 6.51 (d,  $J$  = 3.7 Hz, 1H), 3.90 (q,  $J$  = 7.1 Hz, 2H), 0.85 (t,  $J$  = 7.1 Hz, 3H).

**$^{13}\text{C}$  NMR** (126 MHz,  $\text{C}_6\text{D}_6$ , 23 °C,  $\delta$ ): 156.0 (d,  $^1J_{\text{CF}} = 247.2$  Hz), 150.2, 125.4, 125.2 (d,  $^3J_{\text{CF}} = 7.4$  Hz), 111.4 (d,  $^4J_{\text{CF}} = 3.8$  Hz), 110.0, 108.2, 108.0, 103.0, 62.7, 13.6.

**$^{19}\text{F}$  NMR** (471 MHz,  $\text{C}_6\text{D}_6$ , 23 °C,  $\delta$ ): -121.9.

**HRMS (m/z)** calc'd for  $\text{C}_{11}\text{H}_{10}\text{FNO}_2\text{Na}$   $[\text{M}+\text{Na}]^+$ , 230.0593; found, 230.0597.

### Fluoro-deoxytocopherol [ $^{19}\text{F}$ ]7p

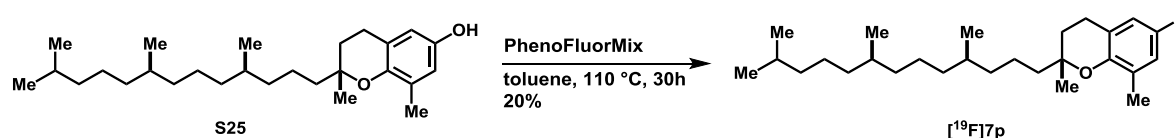

In an  $\text{N}_2$ -filled glovebox, an oven-dried glass vial was charged with **2** (100. mg, 218  $\mu\text{mol}$ , 1.46 eq.), previously dried (200 °C, 24 hrs) CsF (231 mg, 1.52 mmol, 10.2 eq.) and (+)- $\delta$ -tocopherol (**S25**) (60.0 mg, 149  $\mu\text{mol}$ , 1.00 eq.). Dry toluene (0.5 mL) was added and the vial was sealed, then removed from the glovebox. The reaction mixture in the vial was sonicated for 5 min and subsequently heated and stirred at 110 °C for 30 h and then cooled to 23 °C. Then, methanol (1 mL) was added to the reaction mixture, and the reaction mixture was filtered through celite, and the celite was washed with methanol (1 mL). The filtrate was concentrated under reduced pressure, and the product was purified by preparative TLC (hexanes/ethyl acetate 90:10 (v/v)) to give 12 mg (30  $\mu\text{mol}$ ) of [ $^{19}\text{F}$ ]7p as a pale brown oil (20% yield).

$R_f = 0.65$  (EtOAc in hexanes = 10%)

### NMR Spectroscopy:

**$^1\text{H}$  NMR** (600 MHz,  $\text{CDCl}_3$ , 23 °C,  $\delta$ ): 6.66 (dd,  $J = 9.0, 3.1$  Hz, 1H), 6.58 (dd,  $J = 8.9, 2.8$  Hz, 1H), 3.48 (s, 3H), 2.73–2.70 (m, 2H), 2.14 (s, 3H), 1.82–1.70 (m, 2H), 1.60–1.47 (m, 3H), 1.45–1.33 (m, 4H), 1.32–1.25 (m, 5H), 1.25 (s, 3H), 1.18–1.10 (m, 3H), 1.10–1.02 (m, 3H), 0.87–0.83 (m, 12H).

**$^{13}\text{C}$  NMR** (126 MHz,  $\text{CDCl}_3$ , 23 °C,  $\delta$ ): 155.7 (d,  $^1J_{\text{CF}} = 236.3$  Hz), 147.9, 127.7 (d,  $^3J_{\text{CF}} = 7.8$  Hz), 121.3 (d,  $^3J_{\text{CF}} = 7.3$  Hz), 114.9 (d,  $^2J_{\text{CF}} = 22.6$  Hz), 112.2 (d,  $^2J_{\text{CF}} = 22.0$  Hz), 75.9, 39.9, 39.4, 37.5, 37.4, 37.3, 32.8, 32.7, 31.1, 29.7, 28.0, 24.8, 24.5, 24.1, 22.7, 22.6, 22.6, 20.9, 19.8, 19.7, 16.1.

**$^{19}\text{F}$  NMR** (471 MHz,  $\text{CDCl}_3$ , 23 °C,  $\delta$ ): -126.1.

**HRMS (m/z)** calc'd for  $\text{C}_{27}\text{H}_{45}\text{FO}$   $[\text{M}]^+$ , 404.3449; found, 404.3450.

Acetanilide **S7**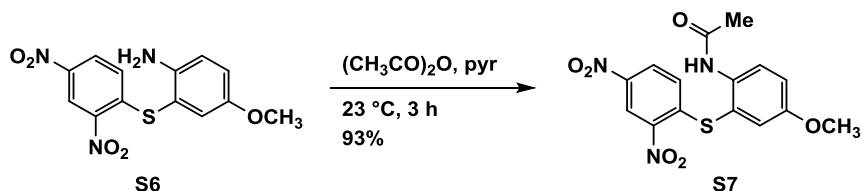

To a stirred solution of **S6** (2.00 g, 6.20 mmol, 1.00 eq.) in pyridine (7.5 mL,  $c = 0.83\text{ M}$ ) was added acetic anhydride (0.58 mL, 0.63 g, 6.2 mmol, 1.0 eq.) at 0 °C. The reaction mixture was warmed to 23 °C and stirred for 3 h at 23 °C. Then 20 mL of ice-cold water were added. The resulting precipitate was filtered off with a Büchner funnel with a fritted disc and washed with 10 mL of water to obtain 2.21 g (6.08 mmol) of **S7** as a yellow solid (93% yield).

$R_f = 0.45$  (EtOAc in hexanes = 50%)

## NMR Spectroscopy:

$^1\text{H NMR}$  (500 MHz,  $\text{CDCl}_3$ , 23 °C,  $\delta$ ): 9.14 (d,  $J = 2.5\text{ Hz}$ , 1H), 8.34 (d,  $J = 9.2\text{ Hz}$ , 1H), 8.19 (dd,  $J = 9.0, 2.5\text{ Hz}$ , 1H), 7.64 (br s, 1H), 7.16 (dd,  $J = 9.0, 3.0\text{ Hz}$ , 1H), 7.09 (d,  $J = 3.0\text{ Hz}$ , 1H), 6.94 (d,  $J = 9.0\text{ Hz}$ , 1H), 3.81 (s, 3H), 2.05 (s, 3H).

$^{13}\text{C NMR}$  (125 MHz,  $\text{CDCl}_3$ , 23 °C,  $\delta$ ): 168.5, 157.1, 146.2, 145.1, 145.0, 144.5, 134.1, 128.8, 127.2, 124.8, 121.8, 121.3, 118.9, 118.7, 55.9.

HRMS ( $m/z$ ) calc'd for  $\text{C}_{15}\text{H}_{14}\text{N}_3\text{O}_6\text{S}$  [ $\text{M}+\text{H}$ ] $^+$ , 364.0603; found, 364.0596.

The  $^1\text{H NMR}$  spectroscopic data correspond to the data reported in the literature.<sup>5</sup>

Methyl acetyl-*L*-tyrosinate (**8**)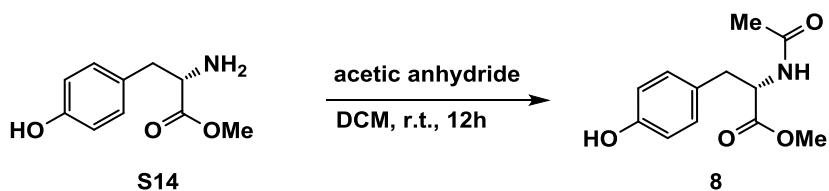

To a solution of *L*-tyrosine methyl ester (**S14**) (100 mg, 513  $\mu\text{mol}$ , 1.00 eq.) in dichloromethane (3 mL,  $c = 0.2\text{ M}$ ) at 23 °C was added acetic anhydride (50.9  $\mu\text{L}$ , 54.9 mg, 538  $\mu\text{mol}$ , 1.05 eq.). The reaction mixture was stirred at 23 °C for 12 h. Then, the solvent was removed *in vacuo*. The product was purified by chromatography on silica gel with hexanes / EtOAc 20:80 (v/v) as eluents to afford 102 mg (430  $\mu\text{mol}$ ) of methyl acetyl-*L*-tyrosinate (**8**) as a colorless solid (84% yield).

$R_f = 0.14$  (EtOAc in hexanes = 75%)

### NMR Spectroscopy:

$^1\text{H NMR}$  (600 MHz,  $\text{CDCl}_3$ , 23 °C,  $\delta$ ) 6.93 (d,  $J = 8.4$  Hz, 2H), 6.73 (d,  $J = 8.4$  Hz, 2H), 6.09 (d,  $J = 8.2$  Hz, 1H), 4.86 (dt,  $J = 7.9, 6.0$  Hz, 1H), 3.74 (s, 3H), 3.08 (dd,  $J = 14.1, 5.6$  Hz, 1H), 2.97 (dd,  $J = 14.1, 6.3$  Hz, 1H), 1.98 (s, 3H).

$^{13}\text{C NMR}$  (126 MHz,  $\text{CDCl}_3$ , 23 °C,  $\delta$ ) 172.2, 170.21, 155.4, 130.1, 126.9, 115.5, 53.3, 52.3, 37.1, 22.9.

HRMS ( $m/z$ ) calc'd for  $\text{C}_{12}\text{H}_{16}\text{NO}_4$   $[\text{M}+\text{H}]^+$ , calc'd 238.1079, found: 238.1080.

### Phenothiazine S8

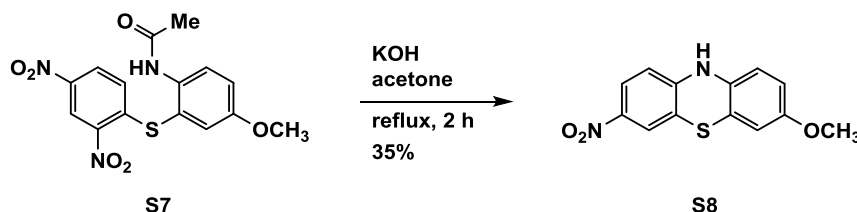

To a stirred solution of **S7** (2.00 g, 5.48 mmol, 1.00 eq.) in acetone (0.13 L,  $c = 43$  mM) was added potassium hydroxide (1.8 g, 33 mmol, 6.0 eq.) portion-wise over 15 min at reflux. The reaction mixture was heated at reflux for 2 h and subsequently cooled to 23 °C. The solution was poured into 20 mL of ice-cold water. The resulting precipitate was filtered off with a Büchner funnel with a fritted disc and washed with 15 mL of water. The solid was dried under vacuum to obtain 0.53 g (1.9 mmol) of **S8** as a violet solid (35% yield).

$R_f = 0.37$  (EtOAc in hexanes = 30%)

### NMR Spectroscopy:

$^1\text{H NMR}$  (500 MHz,  $\text{DMSO}-d_6$ , 23 °C,  $\delta$ ): 9.38 (s, 1H), 7.81 (dd,  $J = 8.9, 2.5$  Hz, 1H), 7.70 (d,  $J = 3.0$  Hz, 1H), 6.64–6.60 (m, 3H), 6.57 (d,  $J = 1.9$  Hz, 1H), 3.67 (s, 3H).

$^{13}\text{C NMR}$  (125 MHz,  $\text{DMSO}-d_6$ , 23 °C,  $\delta$ ): 155.8, 147.9, 140.4, 131.8, 124.7, 121.6, 116.4, 116.2, 115.8, 113.4, 112.9, 111.6, 55.4.

HRMS ( $m/z$ ) calc'd for  $\text{C}_{13}\text{H}_{10}\text{N}_2\text{O}_3\text{SNa}$   $[\text{M}+\text{Na}]^+$ , 297.0310; found, 297.0276.

The  $^1\text{H NMR}$  spectroscopic data correspond to the data reported in the literature.<sup>5</sup>

Fluoro-acetyl-*L*-tyrosinate [<sup>19</sup>F]9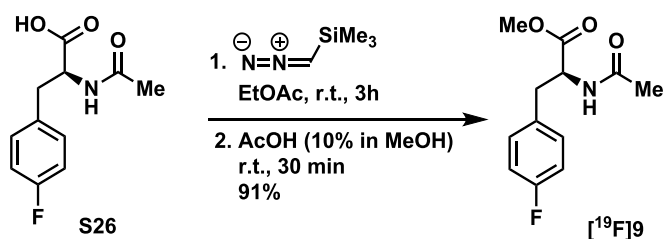

To a solution of *N*-acetyl-4-fluoro-*L*-phenylalanine (**S26**) (50. mg, 0.22 mmol, 1.0 eq.) in ethyl acetate (2 mL, *c* = 0.1 M) was added 0.12 mL trimethylsilyldiazomethane (2.0 M in diethyl ether, 0.24 mmol, 1.1 eq.) and stirred at 23 °C for 3h. Then, 0.5 mL 10% acetic acid in methanol was added and the reaction mixture was stirred for another 30 min and then concentrated in vacuo. *N*-Acetyl-4-fluoro-*L*-phenylalanine methyl ester ([<sup>19</sup>F]**9**) (48 mg, 0.20 mmol) was obtained as a colorless oil (91% yield).

$R_f$  = 0.22 (EtOAc in hexanes = 75%)

## NMR Spectroscopy:

<sup>1</sup>H NMR (600 MHz, CDCl<sub>3</sub>, 23 °C, δ) 7.04 (dd, *J* = 8.6, 5.4 Hz, 2H), 6.94 (t, *J* = 8.7 Hz, 2H), 6.19 (d, *J* = 7.9 Hz, 1H), 4.81 (dt, *J* = 7.8, 5.9 Hz, 1H), 3.68 (s, 3H), 3.09 (dd, *J* = 14.0, 6.0 Hz, 1H), 3.01 (dd, *J* = 14.0, 5.9 Hz, 1H), 1.95 (s, 3H).

<sup>13</sup>C NMR (126 MHz, CDCl<sub>3</sub>, 23 °C, δ) 172.0, 169.8, 162.0 (d, <sup>1</sup>*J*<sub>CF</sub> = 245.5 Hz), 131.7, 130.7, 115.4 (d, <sup>2</sup>*J*<sub>CF</sub> = 21.6 Hz), 53.2, 52.3, 37.0, 23.0.

<sup>19</sup>F NMR (471 MHz, CDCl<sub>3</sub>, 23 °C, δ) -115.7.

HRMS (*m/z*) calc'd for C<sub>12</sub>H<sub>15</sub>FNO<sub>3</sub> [M+H]<sup>+</sup>, calc'd: 240.1036, found: 240.1030.

## Acetyl-phenothiazin S9

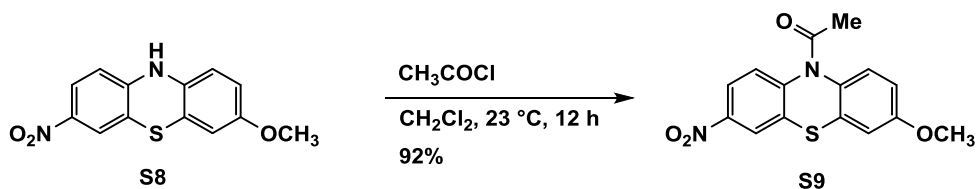

To a stirred solution of **S8** (1.20 g, 4.37 mmol, 1.00 eq.) in CH<sub>2</sub>Cl<sub>2</sub> (24 mL, *c* = 0.18 M) at 0 °C was added acetyl chloride (1.00 mL, 1.10 g, 14.0 mmol, 3.20 eq.) drop-wise over 10 min by a syringe. The solution was warmed to 23 °C and stirred for 12 h. Then the solution was concentrated to dryness under reduced pressure. The resulting residue was dissolved in ethyl acetate (75 mL). The solution was washed with water (15 mL)



and then with brine (20 mL). The ethyl acetate layer was dried over  $\text{Na}_2\text{SO}_4$  and concentrated under reduced pressure to afford a solid, which was purified by chromatography on silica gel eluting with hexanes / EtOAc 3:2 (v/v) to afford 1.27 g (4.01 mmol) of **S9** as an orange solid (92% yield).

$R_f = 0.62$  (EtOAc in hexanes = 40%)

#### NMR Spectroscopy:

$^1\text{H NMR}$  (500 MHz,  $\text{CDCl}_3$ , 23 °C,  $\delta$ ): 8.28 (d,  $J = 2.5$  Hz, 1H), 8.18 (dd,  $J = 8.8, 2.5$  Hz, 1H), 7.72 (d,  $J = 8.8$  Hz, 1H), 7.31 (d,  $J = 8.8$  Hz, 1H), 6.97 (d,  $J = 2.8$  Hz, 1H), 6.89 (dd,  $J = 8.8, 3.0$  Hz, 1H), 3.83 (s, 3H), 2.22 (s, 3H).

$^{13}\text{C NMR}$  (125 MHz,  $\text{CDCl}_3$ , 23 °C,  $\delta$ ): 169.4, 158.7, 145.7, 144.9, 134.5, 133.3, 130.9, 128.1, 127.6, 123.0, 122.2, 114.1, 112.9, 55.9, 23.1.

**HRMS (m/z)** calc'd for  $\text{C}_{15}\text{H}_{13}\text{N}_2\text{O}_4\text{S}$   $[\text{M}+\text{H}]^+$ , 317.0596; found, 317.0593.

The  $^1\text{H NMR}$  spectroscopic data correspond to the data reported in the literature.<sup>5</sup>

#### Hydroxy-phenothiazin **S10**

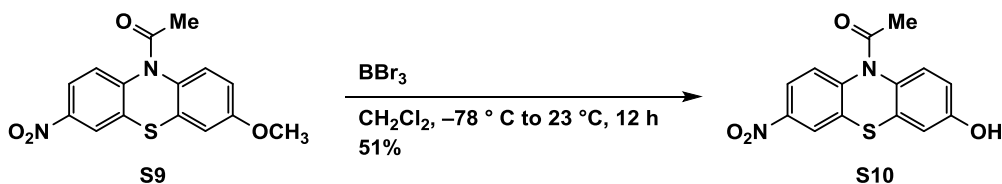

To a stirred solution of **S9** (1.05 g, 3.31 mmol, 1.00 eq.) in  $\text{CH}_2\text{Cl}_2$  (0.13 L,  $c = 22$  mM) at  $-78$  °C was added  $\text{BBr}_3$  in  $\text{CH}_2\text{Cl}_2$ ,  $c = 1.0$  M (13 mL, 13 mmol, 4.0 eq.) drop-wise over 30 min by a syringe pump. The reaction mixture was stirred for 12 h, allowing the reaction temperature to rise to 23 °C.  $\text{CH}_2\text{Cl}_2$  was removed under reduced pressure and the resulting residue was dissolved in ethyl acetate (100 mL) and then water (25 mL). The organic layer was washed with brine (25 mL), dried over  $\text{Na}_2\text{SO}_4$  and concentrated under reduced pressure. The residue was purified by chromatography on silica gel eluting with hexanes in EtOAc 1:1 (v/v) to afford 0.51 g (1.7 mmol) of **S10** as a yellow solid (51% yield).

$R_f = 0.42$  (EtOAc in hexanes = 50%)

#### NMR Spectroscopy:

$^1\text{H NMR}$  (500 MHz,  $\text{DMSO}-d_6$ , 23 °C,  $\delta$ ): 9.96 (s, 1H), 8.32 (d,  $J = 2.6$  Hz, 1H), 8.14 (dd,  $J = 8.8, 2.6$  Hz, 1H), 7.74 (d,  $J = 8.8$  Hz, 1H), 7.39 (d,  $J = 8.6$  Hz, 1H), 6.86 (d,  $J = 2.6$  Hz, 1H), 6.74 (dd,  $J = 8.7, 2.6$  Hz, 1H), 2.08 (s, 3H).

**<sup>13</sup>C NMR** (125 MHz, DMSO-*d*<sub>6</sub>, 23 °C, δ): 168.6, 156.3, 145.2, 144.6, 133.8, 131.9, 128.9, 128.2, 128.1, 122.8, 122.2, 114.9, 113.9, 22.6.

**HRMS (m/z)** calc'd for C<sub>14</sub>H<sub>11</sub>N<sub>2</sub>O<sub>4</sub>S [M+H]<sup>+</sup>, 303.0440; found, 303.0420.

The <sup>1</sup>H NMR spectroscopic data correspond to the data reported in the literature.<sup>5</sup>

### ***N*-(4-Hydroxyphenyl)benzamide (S11)**

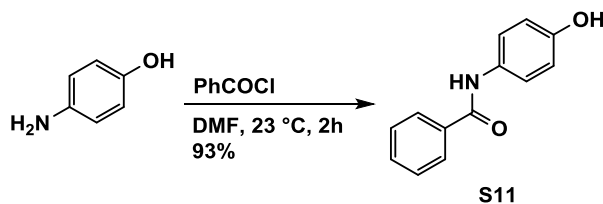

To a stirred solution of 4-aminophenol (500 mg, 4.58 mmol, 1.00 eq.) in DMF (3.0 mL, *c* = 1.5 M) at 0 °C was added benzoyl chloride (530 μL, 643 mg, 4.58 mmol, 1.00 eq.) drop-wise by a syringe over 5 min. The mixture was warmed to 23 °C and stirred for 2 h. Then aqueous 1 M NaOH solution (5 mL) was added to the above solution to adjust the pH to 7. The resulting solution was added drop-wise to ice-cold water (10 mL) with a syringe over 10 min. The resulting precipitate was filtered off with a Büchner funnel and dried under vacuum to afford 908 mg (4.26 mmol) of **S11** as an off-white solid (93% yield).

*R<sub>f</sub>* = 0.47 (EtOAc in hexanes = 50%)

### **NMR Spectroscopy:**

**<sup>1</sup>H NMR** (500 MHz, CD<sub>3</sub>OD, 23 °C, δ): 7.92–7.89 (m, 2H), 7.58–7.54 (m, 1H), 7.52–7.47 (m, 2H), 7.45 (d, *J* = 8.9 Hz, 2H), 6.78 (d, *J* = 8.9 Hz, 2H).

**<sup>13</sup>C NMR** (125 MHz, CD<sub>3</sub>OD, 23 °C, δ): 168.7, 155.8, 136.4, 132.7, 131.6, 129.6, 128.5, 124.2, 112.3.

**HRMS (m/z)** calc'd for C<sub>13</sub>H<sub>11</sub>NO<sub>2</sub>Na [M+Na]<sup>+</sup>, 236.0687; found, 236.0724.

## Purin S13

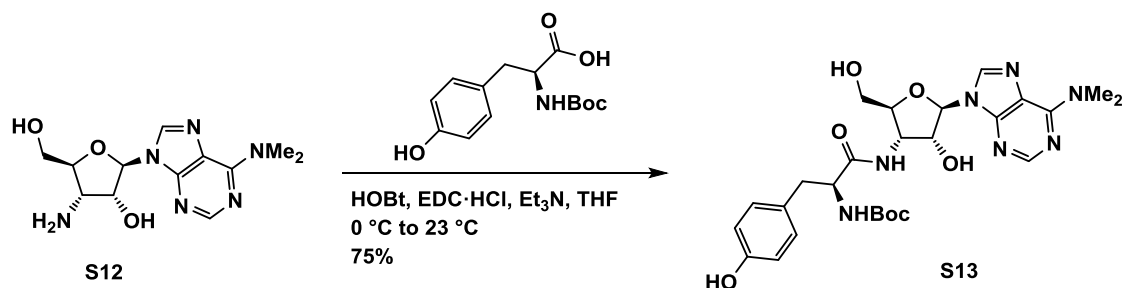

To a stirred solution of Boc-Tyr-OH (19 mg, 68  $\mu\text{mol}$ , 1.0 eq.) in THF (1.0 mL,  $c = 0.068\text{ M}$ ) at 0  $^{\circ}\text{C}$  was added a solution of puromycin aminonucleoside **S12** (20 mg, 68  $\mu\text{mol}$ , 1.0 eq.) in THF (0.35 mL,  $c = 0.20\text{ M}$ ) in one portion. Subsequently, 1-hydroxybenzotriazole (HOBt, 9.2 mg, 68  $\mu\text{mol}$ , 1.0 eq.), 1-ethyl-3-(3-dimethylaminopropyl)carbodiimide hydrochloride (EDC·HCl, 23 mg, 0.12 mmol, 1.7 eq.), and triethyl amine (33  $\mu\text{L}$ , 24 mg, 0.24 mmol, 3.5 eq.) were added to the above solution at 0  $^{\circ}\text{C}$ . The reaction mixture was allowed to warm to 23  $^{\circ}\text{C}$  and stirred for 12 h. The resulting solution was diluted with ethyl acetate (10 mL) and filtered through a celite pad. The filtrate was washed with 1 M aqueous HCl solution (2 mL),  $\text{H}_2\text{O}$  (1 mL) and then brine (1 mL). The organic layer was dried over  $\text{Na}_2\text{SO}_4$  and concentrated under reduced pressure. The product was purified by chromatography on silica gel eluting with MeOH /  $\text{CH}_2\text{Cl}_2$  5:95 (v/v) to afford 28 mg (51  $\mu\text{mol}$ ) of **S13** as a colorless solid (75% yield).

$R_f = 0.32$  (MeOH in  $\text{CH}_2\text{Cl}_2 = 5\%$ )

## NMR Spectroscopy:

$^1\text{H NMR}$  (500 MHz,  $\text{CD}_2\text{Cl}_2:\text{CD}_3\text{OD}$  1:1, calibrated to  $\text{CD}_2\text{Cl}_2$  peak, 23  $^{\circ}\text{C}$ ,  $\delta$ ): 8.18 (s, 1H), 8.14 (s, 1H), 7.01 (d,  $J = 8.6\text{ Hz}$ , 2H), 6.69 (d,  $J = 8.5\text{ Hz}$ , 2H), 5.76 (d,  $J = 3.1\text{ Hz}$ , 1H), 4.50 (br s, 2H), 4.45–4.42 (m, 1H), 4.21–4.18 (m, 1H), 3.94–3.92 (m, 1H), 3.81 (d,  $J = 12.2\text{ Hz}$ , 1H), 3.56 (d,  $J = 12.8\text{ Hz}$ , 1H), 3.42 (br s, 6H), 3.24–3.27 (m, 1H), 2.89–2.77 (m, 3H), 1.34 (s, 9H).

$^{13}\text{C NMR}$  (125 MHz,  $\text{CD}_2\text{Cl}_2:\text{CD}_3\text{OD}$  1:1, calibrated to  $\text{CD}_2\text{Cl}_2$  peak 23  $^{\circ}\text{C}$ ,  $\delta$ ): 156.8, 155.7, 154.7, 152.4, 149.7, 138.6, 130.9, 128.4, 121.4, 116.1, 112.9, 110.9, 91.7, 84.7, 80.7, 74.4, 61.9, 57.2, 51.3, 38.2, 38.06, 28.5.

**HRMS** ( $m/z$ ) calc'd for  $\text{C}_{26}\text{H}_{36}\text{N}_7\text{O}_7$   $[\text{M}+\text{H}]^+$ , 558.2676; found, 558.2635.

## 4-Fluoroaniline S16

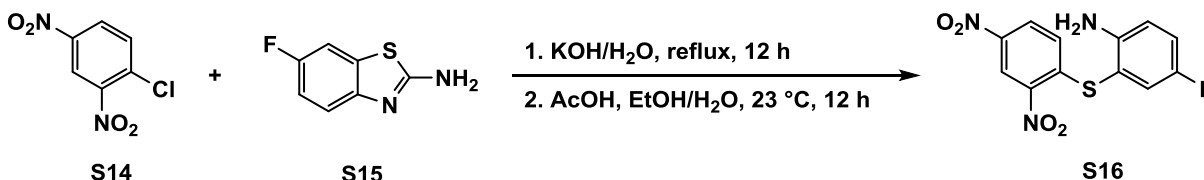

To an aqueous solution of potassium hydroxide (20 mL, 50% w/w) was added 6-fluorobenzo[d]thiazol-2-amine (0.94 g, 5.6 mmol, 1.1 eq.) at 23 °C. The reaction mixture was heated at reflux and stirred for 12 h. Then the resulting solution was cooled to 23 °C. The solution was then added drop-wise over 10 min with a syringe to a stirred solution of 1-chloro-2,4-dinitrobenzene (1.0 g, 5.0 mmol, 1.0 eq.) in ethanol (40 mL)/acetic acid (100 mL) at 0 °C. The mixture was warmed to 23 °C and stirred for 2 h. The resulting precipitate was filtered off with a Büchner funnel with a fritted disc and washed with water (15 mL) and ethanol (10 mL) to afford **S16**, which was used in the next step without purification.

## 2,4-Dinitrophenylthio-acetamide S17

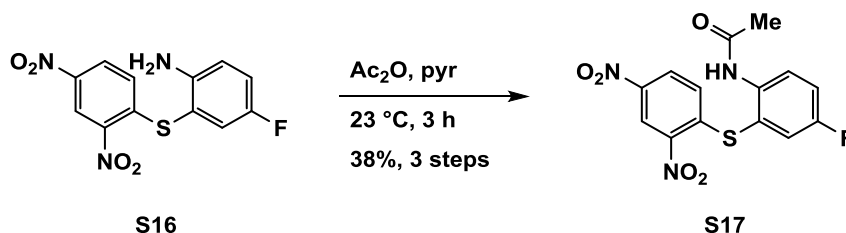

To a stirred solution of **S16** (1.40 g, 4.52 mmol, 1.00 eq.) in pyridine (5.5 mL,  $c = 0.83$  M) was added acetic anhydride (430  $\mu$ L, 460 mg, 4.52 mmol, 1.00 eq.) at 0 °C. The solution was warmed to 23 °C and stirred for 3 h. Then, the reaction mixture was poured into 20 mL of ice-cold water. The resulting precipitate was filtered off with a Büchner funnel with fritted glass and was washed with 10 mL of water. The solid was dried under vacuum to afford 0.76 g (2.1 mmol) of **S17** as a pale yellow solid (38% yield over three steps).

$R_f = 0.51$  (EtOAc in hexanes = 20%)

## NMR Spectroscopy:

$^1\text{H NMR}$  (500 MHz,  $\text{CDCl}_3$ , 23 °C,  $\delta$ ): 9.12 (d,  $J = 2.5$  Hz, 1H), 8.44 (dd,  $J = 2.7, 2.2$  Hz, 1H), 8.21 (dd,  $J = 9.0, 2.5$  Hz, 1H), 8.05 (s, 1H), 7.55 (dd,  $J = 6.8, 6.2$  Hz, 1H), 6.97 (td,  $J = 8.1, 2.8$  Hz, 1H), 6.87 (d,  $J = 8.9$  Hz, 1H), 2.12 (s, 3H).

$^{13}\text{C NMR}$  (125 MHz,  $\text{CDCl}_3$ , 23 °C,  $\delta$ ): 168.7, 165.5 (d,  $J = 251.1$  Hz), 144.7, 145.3, 144.8 (d,  $J = 1.7$  Hz), 142.9 (d,  $J = 12.7$  Hz), 138.8 (d,  $J = 9.9$  Hz), 128.3, 127.8, 121.9, 112.9 (d,  $J = 22.4$  Hz), 110.9 (d,  $J =$

3.2 Hz), 109.5 (d,  $J = 28.0$  Hz), 25.1.

$^{19}\text{F}$  NMR (376 MHz,  $\text{CDCl}_3$ , 23 °C,  $\delta$ ): -102.5.

HRMS ( $m/z$ ) calc'd for  $\text{C}_{14}\text{H}_{10}\text{FN}_3\text{O}_5\text{SNa}$  [ $\text{M}+\text{Na}$ ] $^+$ , 374.0223; found, 374.0235.

### 3-Fluoro-7-nitro-10*H*-phenothiazine (**S18**)

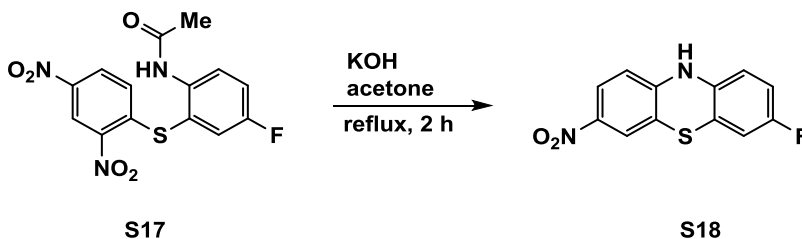

To a stirred solution of **S17** (0.50 g, 1.4 mmol, 1.0 eq.) in acetone (33 mL,  $c = 0.043$  M) was added potassium hydroxide (0.48 g, 8.5 mmol, 6.0 eq.) portionwise over 15 min at reflux. The reaction mixture was stirred for another 2 h and subsequently cooled to 23 °C. The solution was poured into ice-cold water (10 mL). The resulting precipitate was filtered off with a Büchner funnel with a fritted glass and washed with 5 mL of water and dried under vacuum to afford 0.15 g of **S18** as a violet solid, which was used for the next step without further purification.

### *tert*-Butyldiphenylsilyloxy-phenylazetididin **S20**

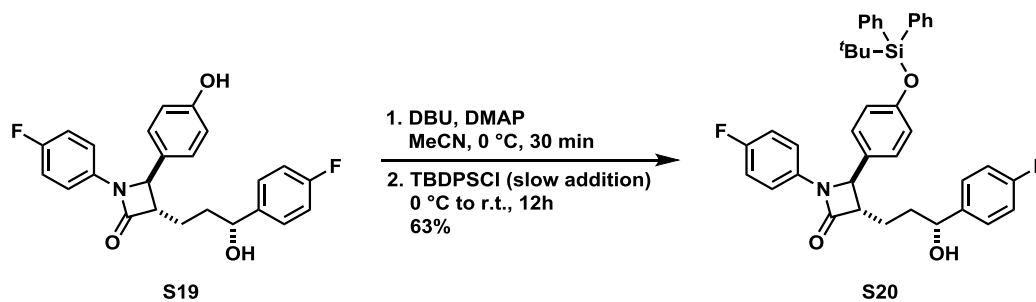

An oven-dried 5 mL glass vial was charged with magnetic stirring bar, dry acetonitrile (MeCN) (2.0 mL) and was cooled to 0 °C. Under  $\text{N}_2$  atmosphere, ezetimibe (**S19**) (0.16 g, 0.39 mmol, 1.0 eq.), 4-(dimethylamino)-pyridine (DMAP) (16 mg, 0.13 mmol, 0.34 eq.) and 1,8-diazabicyclo[5.4.0]undec-7-ene (DBU) (0.15 g, 0.15 mL, 0.98 mmol, 2.5 eq.) were added to the vial. Then, *tert*-butyl(chloro)diphenylsilane (TBDPSCI) (0.27 g, 0.26 mL, 0.98 mmol, 2.5 eq.) was added dropwise to the stirring solution with syringe over 5 min. Then the ice bath was removed and the reaction mixture was stirred for 12 h at 23 °C. Then, the reaction mixture was concentrated under reduced pressure and the residue was purified by preparative TLC (hexanes/ethyl acetate 85:15 (v/v)) to give 160 mg (257  $\mu\text{mol}$ ) of **S20** as a pale yellow oil (63% yield).

R<sub>f</sub> = 0.45 (EtOAc in hexanes = 15%)

### NMR Spectroscopy:

**<sup>1</sup>H NMR** (600 MHz, CDCl<sub>3</sub>, 23 °C, δ): 7.68–7.70 (m, 4H), 7.40–7.44 (m, 2H), 7.35 (td, *J* = 7.1, 1.1 Hz, 4H), 7.24–7.27 (m, 2H), 7.17 (dd, *J* = 9.1, 4.5 Hz, 2H), 7.04 (d, *J* = 8.6 Hz, 2H), 6.98 (t, *J* = 8.7 Hz, 2H), 6.89 (dd, *J* = 9.1, 8.3 Hz, 2H), 6.75 (d, *J* = 8.6 Hz, 2H), 4.66 (dd, *J* = 7.2, 5.2 Hz, 1H), 4.48 (d, *J* = 2.4 Hz, 1H), 3.03 (dt, *J* = 7.5, 2.5 Hz, 1H), 1.82–1.99 (m, 4H), 1.10 (s, 9H).

**<sup>13</sup>C NMR** (126 MHz, CDCl<sub>3</sub>, 23 °C, δ): 171.2, 167.7, 162.1 (d, *J* = 245.3 Hz), 158.9 (d, *J* = 243.2 Hz), 155.9, 140.1, 135.52, 135.50, 133.9, 132.61, 132.62, 130.0, 129.7, 127.8, 127.7, 127.4 (d, *J* = 7.9 Hz), 126.9, 120.5, 118.4 (d, *J* = 7.7 Hz), 115.7 (d, <sup>2</sup>*J*<sub>CF</sub> = 22.5 Hz), 115.3 (d, *J* = 21.4 Hz), 72.9, 61.1, 60.1, 36.6, 26.5, 25.0, 19.4.

**<sup>19</sup>F NMR** (471 MHz, CDCl<sub>3</sub>, 23 °C, δ): –115.0, –118.2.

**HRMS (m/z)** calc'd for C<sub>40</sub>H<sub>40</sub>F<sub>2</sub>NO<sub>3</sub>Si [M+H]<sup>+</sup>, 648.2746; found, 648.2798.

### PMB-ether S21

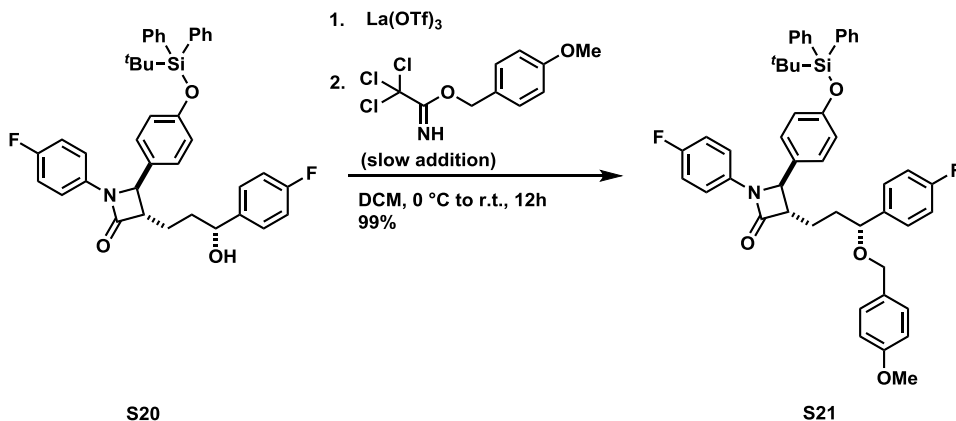

An oven-dried glass dram vial was charged with magnetic stir bar, dry dichloromethane (2.0 mL) and was cooled to 0 °C. Under N<sub>2</sub> atmosphere, **S20** (120 mg, 185 μmol, 1.00 eq.) and lanthanum(III) trifluoromethanesulfonate (La(OTf)<sub>3</sub>) (20.0 mg, 34.1 μmol, 18.4 mol%) were added to the vial. Then, 4-methoxybenzyl-2,2,2-trichloroacetimidate (136 mg, 100 μL, 481 μmol, 2.60 eq.) was slowly added to the stirred solution over 5 min. Then, the vial, which contained the reaction mixture was taken out of the ice bath and allowed to warm to 23 °C. The reaction mixture was stirred overnight for 12 h at 23 °C. Then, the reaction mixture was concentrated under reduced pressure, and the product was purified by preparative TLC (hexanes/ethyl acetate 95:5 (v/v)) to give 0.14 g (0.18 mmol) of **S21** as a pale yellow oil (99% yield).

R<sub>f</sub> = 0.60 (EtOAc in hexanes = 5%)

### NMR Spectroscopy:

**<sup>1</sup>H NMR** (600 MHz, CDCl<sub>3</sub>, 23 °C, δ): 7.67–7.70 (m, 4H), 7.42 (td, *J* = 7.2, 2.2 Hz, 2H), 7.35 (td, *J* = 7.3, 1.3 Hz, 4H), 7.21 (dd, *J* = 8.5, 5.5 Hz, 2H), 7.15 (dd, *J* = 8.8, 3.5 Hz, 4H), 7.02 (d, *J* = 8.6 Hz, 2H), 6.99 (d, *J* = 8.6 Hz, 2H), 6.87–6.91 (m, 2H), 6.83 (d, *J* = 8.7 Hz, 2H), 6.72 (d, *J* = 8.7 Hz, 2H), 4.44 (d, *J* = 2.4 Hz, 1H), 4.33 (d, *J* = 11.3 Hz, 1H), 4.20 (dd, *J* = 7.7, 4.8 Hz, 1H), 4.10 (d, *J* = 11.3 Hz, 1H), 3.78 (s, 3H), 2.91 (ddd, *J* = 8.9, 6.2, 2.4 Hz, 1H), 1.82–1.97 (m, 4H), 1.09 (s, 9H).

**<sup>13</sup>C NMR** (126 MHz, CDCl<sub>3</sub>, 23 °C, δ): 167.6, 162.4 (d, *J* = 245.4 Hz), 159.3, 158.9 (d, *J* = 243.0 Hz), 155.9, 137.9, 135.6 (d, *J* = 3.7 Hz), 134.1, 132.7, 130.2 (d, *J* = 9.7 Hz), 130.1, 130.0, 129.6, 129.4 (d, *J* = 21.5 Hz), 128.3 (d, *J* = 7.9 Hz), 127.9 (d, *J* = 2.5 Hz), 127.0, 120.5, 118.4 (d, *J* = 7.7 Hz), 115.7 (d, *J* = 22.7 Hz), 115.5 (d, *J* = 21.3 Hz), 114.4, 114.1, 113.9, 113.9, 79.5, 70.1, 61.0, 60.2, 55.3, 35.9, 26.6, 25.2, 19.5.

**<sup>19</sup>F NMR** (471 MHz, CDCl<sub>3</sub>, 23 °C, δ): –114.7, –118.3.

**HRMS (m/z)** calc'd for C<sub>48</sub>H<sub>48</sub>F<sub>2</sub>NO<sub>4</sub>Si [M+H]<sup>+</sup>, 768.3321; found, 768.3322.

### 4-Hydroxyphenylazetididin **S22**

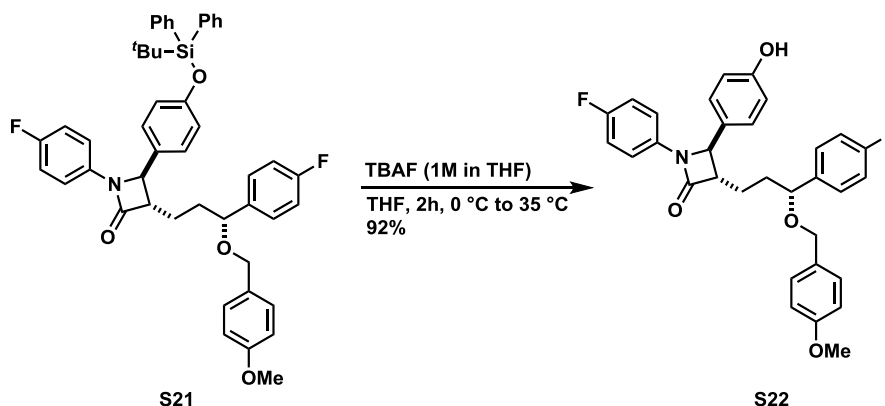

An oven-dried 5 mL glass vial was charged with magnetic stir bar, dry THF (2.0 mL) and was cooled to 0 °C. Under N<sub>2</sub> atmosphere, PMB ether **S21** (110 mg, 143 μmol, 1.00 eq.) was added to the vial. Then, tetrabutylammonium fluoride solution in THF (*c* = 1.0 M) (215 μL, 194 mg, 215 μmol, 1.50 eq.) was slowly added to the stirred solution over 10 min at 0 °C. Then the ice bath was removed and the reaction mixture was stirred for 2 h at 23 °C. The reaction mixture was concentrated under reduced pressure, and the product was purified by preparative TLC (hexanes/ethyl acetate 85:15 (v/v)) to give 70 mg (0.13 mmol) of **S22** as a pale yellow oil (92% yield).

$R_f = 0.45$  (EtOAc in hexanes = 15%)

### NMR Spectroscopy:

$^1\text{H NMR}$  (600 MHz,  $\text{CDCl}_3$ , 23 °C,  $\delta$ ): 7.19–7.24 (m, 4H), 7.16 (d,  $J = 8.6$  Hz, 2H), 7.11 (d,  $J = 8.6$  Hz, 2H), 7.04–7.00 (m, 2H), 6.89 (dd,  $J = 9.1, 8.3$  Hz, 2H), 6.84 (d,  $J = 8.6$  Hz, 2H), 6.80 (d,  $J = 5.6$  Hz, 2H), 4.53 (d,  $J = 2.3$  Hz, 1H), 4.34 (d,  $J = 11.3$  Hz, 1H), 4.24 (dd,  $J = 7.6, 4.9$  Hz, 1H), 4.12 (d,  $J = 11.3$  Hz, 1H), 3.78 (s, 3H), 2.95 (ddd,  $J = 8.8, 6.1, 2.3$  Hz, 1H), 1.86–1.98 (m, 4H).

$^{13}\text{C NMR}$  (126 MHz,  $\text{CDCl}_3$ , 23 °C,  $\delta$ ): 170.1, 164.6 (d,  $J = 245.7$  Hz), 161.5, 161.3 (d,  $J = 243.9$  Hz), 158.9, 140.0, 136.2, 132.4, 131.8, 131.2, 130.6 (d,  $J = 7.9$  Hz), 129.6, 120.7 (d,  $J = 7.3$  Hz), 118.4, 118.1 (d,  $J = 22.4$  Hz), 117.8 (d,  $J = 21.3$  Hz), 116.2, 82.0, 72.4, 69.7, 62.5, 57.6, 35.5, 25.7.

$^{19}\text{F NMR}$  (471 MHz,  $\text{CDCl}_3$ , 23 °C,  $\delta$ ): -114.7, -118.1.

HRMS ( $m/z$ ) calc'd for  $\text{C}_{32}\text{H}_{30}\text{F}_2\text{NO}_4$   $[\text{M}+\text{H}]^+$ , 530.2143; found, 530.2157.

### Fluorophenylazetidin S23

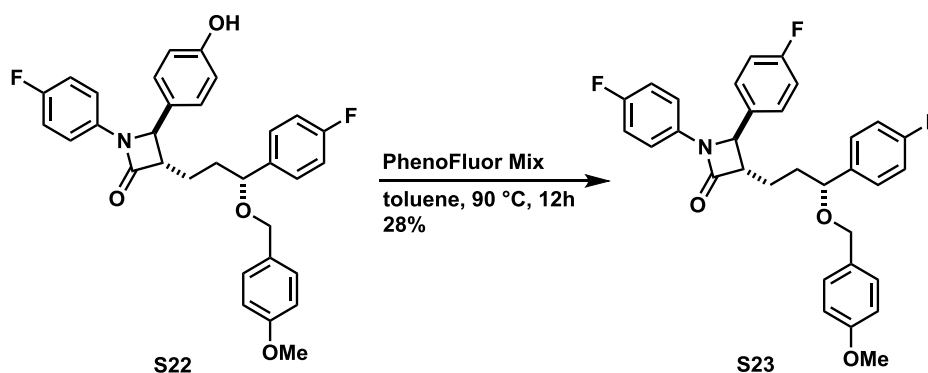

In an  $\text{N}_2$ -filled glovebox, an oven-dried vial was charged with **2** (74.0 mg, 161  $\mu\text{mol}$ , 1.31 eq.), previously dried (200 °C, 24 h) CsF (185 mg, 1.22 mmol, 9.92 eq.) and PMB ether **S22** (65.0 mg, 123  $\mu\text{mol}$ , 1.00 eq.). Dry toluene (0.5 mL) was added to the vial and the vial was sealed, sonicated for 5 min and then the reaction mixture was stirred at 90 °C for 12 h. Then the reaction mixture was allowed to cool to 23 °C. Then, methanol (1 mL) was added to the reaction mixture, and then the reaction mixture was filtered through celite and the celite was washed with methanol (1 mL). The filtrate was concentrated under reduced pressure, and the product was purified by preparative TLC (hexanes/ethyl acetate 90:10 (v/v)) to give 18 mg (34  $\mu\text{mol}$ ) of **S23** as a pale yellow oil (28% yield).

$R_f = 0.78$  (EtOAc in hexanes = 10%)

### NMR Spectroscopy:



**<sup>1</sup>H NMR** (600 MHz, CDCl<sub>3</sub>, 23 °C, δ): 7.23 (ddd, *J* = 7.7, 6.0, 2.3 Hz, 4H), 7.17 (dd, *J* = 9.1, 4.8 Hz, 2H), 7.15 (d, *J* = 8.6 Hz, 2H), 7.02 (td, *J* = 8.6, 1.7 Hz, 4H), 6.92–6.88 (m, 2H), 6.83 (d, *J* = 8.6 Hz, 2H), 4.57 (d, *J* = 2.3 Hz, 1H), 4.33 (d, *J* = 11.4 Hz, 1H), 4.23 (dd, *J* = 7.7, 4.8 Hz, 1H), 4.11 (d, *J* = 11.3 Hz, 1H), 3.77 (s, 3H), 2.95 (ddd, *J* = 10.4, 5.0, 1.9 Hz, 1H), 1.93–1.85 (m, 2H), 1.80–1.75 (m, 2H).

**<sup>13</sup>C NMR** (126 MHz, CDCl<sub>3</sub>, 23 °C, δ): 167.1, 162.7 (d, <sup>1</sup>*J*<sub>CF</sub> = 247.66 Hz), 162.3 (d, <sup>1</sup>*J*<sub>CF</sub> = 245.81 Hz), 159.0 (d, <sup>1</sup>*J*<sub>CF</sub> = 243.45 Hz), 159.3, 147.4, 137.7 (d, <sup>4</sup>*J*<sub>CF</sub> = 3.2 Hz), 133.8 (d, <sup>4</sup>*J*<sub>CF</sub> = 2.7 Hz), 133.4 (d, <sup>4</sup>*J*<sub>CF</sub> = 3.3 Hz), 130.1, 129.5, 128.2 (d, <sup>3</sup>*J*<sub>CF</sub> = 8.0 Hz), 127.5 (d, <sup>3</sup>*J*<sub>CF</sub> = 8.2 Hz), 118.3 (d, <sup>3</sup>*J*<sub>CF</sub> = 7.7 Hz), 116.3 (d, <sup>2</sup>*J*<sub>CF</sub> = 21.7 Hz), 115.9 (d, <sup>2</sup>*J*<sub>CF</sub> = 22.8 Hz), 115.5 (d, <sup>2</sup>*J*<sub>CF</sub> = 21.5 Hz), 113.8, 79.6, 70.1, 60.6, 55.3, 35.9, 25.3.

**<sup>19</sup>F NMR** (471 MHz, CDCl<sub>3</sub>, 23 °C, δ): –113.0, –114.7, –118.0.

**HRMS (m/z)** calc'd for C<sub>32</sub>H<sub>29</sub>F<sub>3</sub>NO<sub>3</sub> [M+H]<sup>+</sup>, 532.2100; found, 532.2107.

### Radiochemistry general methods

No-carrier-added <sup>18</sup>F-fluoride was produced from water 97% enriched in <sup>18</sup>O (Sigma-Aldrich®) by the nuclear reaction <sup>18</sup>O(p,n)<sup>18</sup>F with a Siemens Eclipse HP cyclotron and a silver-bodied target at MGH Athinoula A. Martinos Center for Biomedical Imaging. The produced <sup>18</sup>F-fluoride in water was transferred from the cyclotron target by helium push. Liquid chromatographic analysis (LC) was performed with Agilent 1100 series HPLCs connected to a Carol and Ramsey Associates Model 105-S radioactivity detector. An Agilent Eclipse XDB-C18, 5 μm, 4.6 × 150 mm HPLC column was used for analytical analysis and an Agilent Eclipse XDB-C18, 5 μm, 9.4 × 250 mm HPLC column was used for preparative HPLC. Analytical and preparative HPLC used the following mobile phases: 0.1% CF<sub>3</sub>CO<sub>2</sub>H in water (A), 0.1% CF<sub>3</sub>CO<sub>2</sub>H in acetonitrile (B). Unless otherwise mentioned, the HPLC was programmed: 20% (B) for 1 min then a gradient 20–95% (B) over 13 min followed by 3 min of 95% (B). In the analysis of the <sup>18</sup>F-labeled compounds, isotopically unmodified reference substances were used for identification. Radioactivity was measured in a Capintec, Inc. CRC-25PET ion chamber.

Solvents and reagents for radiochemical experiments: Acetonitrile (ACS reagent, >99.0%), ethanol (absolute, >99.8%), DMSO (ACS reagent >99.9%) were purchased from SigmaAldrich® and used as received. Water was obtained from a Millipore Milli-Q Integral Water Purification System. Potassium bicarbonate (≥99%) was purchased from SigmaAldrich® and used as received.

All <sup>18</sup>F-labeled molecules were characterized by comparing the radioactivity HPLC trace of the reaction mixture to the HPLC UV trace of an authentic reference sample, which was either synthesized as a new or known compound or purchased from a commercial source. The synthetic procedures of all the new reference standards are described in this work. Note: radioactivity chromatographs are offset by 0.15 min on account of

the delay introduced by the spatial separation between the diode array detector and the radioactivity detector. Unless otherwise stated, the radiochemical yields (RCYs, percentage of  $^{18}\text{F}$  transformed into desired product, corrected for decay) are estimated from an aliquot of the reaction mixtures by radio-HPLC and radio-TLC.

Elution Efficiency (EE) was calculated as following:

$$\text{EE} = \frac{\text{total activity of the reaction mixture after elution of } ^{18}\text{F}\text{-fluoride into a vial}}{\text{activity of cartridge after loading of } ^{18}\text{F} \text{ from cyclotron onto the cartridge}}$$

### Optimization studies for deoxy[ $^{18}\text{F}$ ]fluorination of phenols

Estrone was chosen as a model phenol because of commercial availability and the high boiling point of the corresponding fluorinated product.

**Optimization of [CpRu(cod)Cl] (1) stoichiometry:** We found that 3 equivalents of **1** is an optimal compromise between radiochemical yield and elution efficiency, which increased with higher amounts, and practicality with respect to solubility of the complex. (Scheme S1)

Estrone (2.3 mg, 8.7  $\mu\text{mol}$ , 1.0 eq.) and [CpRu(cod)Cl] (**1**) (a: 2.7 mg, 8.7  $\mu\text{mol}$ , 1 eq.; b: 5.3 mg, 17  $\mu\text{mol}$ , 2.0 eq. and c: 8.0 mg, 26  $\mu\text{mol}$ , 3.0 eq.) were added to EtOH (50  $\mu\text{L}$ , c = a: 0.27 M, b: 0.53 M and c: 0.80 M) in a 0.5 dram (1.8 mL) borosilicate glass vial. The vial was capped, and the reaction mixture was stirred at 85  $^{\circ}\text{C}$  (heating block temperature) for 30 min. Then, the mixture was allowed to stand for 3 min at 23  $^{\circ}\text{C}$ . To the vial, imidazolium chloride **2** (14 mg, 26  $\mu\text{mol}$ , 3.0 eq.) and 150  $\mu\text{L}$  of MeCN were added, and the resulting solution was drawn into a 1.0 mL polypropylene syringe for elution of fluoride.

$^{18}\text{F}$ -Fluoride solution from the cyclotron was loaded with a syringe onto a QMA anion exchange cartridge (Chromafix 30-PS- $\text{HCO}_3$ ), and the trapped radioactivity was measured (a: 10.2 mCi, 377 MBq; b: 9.25 mCi, 342 MBq; c: 16.2 mCi, 599 MBq). The cartridge was washed with MeCN (1.0 mL, inverted and fitted with a female x female Luer adapter. With the solution of estrone-ruthenium complex and **2**, the  $^{18}\text{F}$ -fluoride was eluted into a 1 dram (3.7 mL) borosilicate vial. The cartridge was washed with DMSO (150  $\mu\text{L}$ ), followed by DMSO:MeCN (50  $\mu\text{L}$ , 1:1 (v/v)) and the radioactivity of the eluted solution was measured (a: 6.3 mCi, 0.23 GBq; b: 6.0 mCi, 0.22 GBq; c: 10.6 mCi, 392 MBq). The reaction vial, which contained 400  $\mu\text{L}$  of the reaction mixture was sealed with teflon-lined caps and heated at 125  $^{\circ}\text{C}$  for 30 min. Then the mixture was allowed to stand for 3 min at 23  $^{\circ}\text{C}$ . The reaction mixtures were analyzed by radio-HPLC and radio-TLC. The product **7d** was characterized by comparing the radio-HPLC traces of the reaction mixture with the HPLC UV trace of the authentic reference sample.

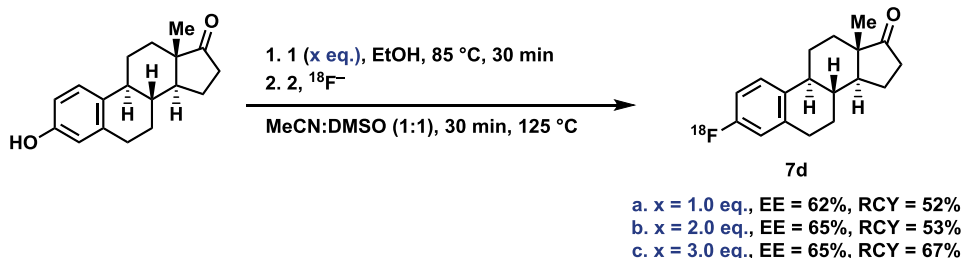

**Scheme S1.** The effect of [CpRu(cod)Cl] (**1**) stoichiometry on the [ $^{18}\text{F}$ ]deoxyfluorination of estrone. EE = elution efficiency, RCY estimated by TLC.

**Optimization of complexation time:** The radiochemical yield as a function of complexation time of [CpRu(cod)Cl] (**1**) with estrone as a phenol was shown to reach a plateau around 30 min. (Figure S1) The complexation time of estrone and **1** from 5 min to 30 min did not affect the elution efficiency, and elution efficiency remained relatively unchanged. (EE = ca. 65%)

Estrone (2.3 mg, 8.7  $\mu\text{mol}$ , 1.0 eq.) and [CpRu(cod)Cl] (**1**) (8.0 mg, 26  $\mu\text{mol}$ , 3.0 eq.) were added to an EtOH (50  $\mu\text{L}$ , c = 0.80 M) in a 0.5 dram (1.8 mL) borosilicate glass vial. The vial was capped, and the reaction mixture was stirred at 85 °C (heating block temperature) for 5, 10, 15, 20 and 30 min, respectively. The vial was allowed to stand for 3 min at 23 °C. To the vial, imidazolium chloride **2** (14 mg, 26  $\mu\text{mol}$ , 3.0 eq.) and 150  $\mu\text{L}$  of MeCN were added, and the resulting mixture was drawn into a 1.0 mL polypropylene syringe for elution of fluoride.

$^{18}\text{F}$ -Fluoride solution from the cyclotron was loaded with a syringe onto a QMA anion exchange cartridge (Chromafix 30-PS- $\text{HCO}_3^-$ ), and the trapped activity was measured (a: 6.4 mCi, 0.24 GBq; b: 8.4 mCi, 0.31 GBq; c: 7.9 mCi, 0.29 GBq; d: 6.4 mCi, 0.24 GBq; e: 16.2 mCi, 599 MBq). The cartridge was washed with MeCN (1.0 mL). The cartridge was inverted and fitted with a female x female Luer adapter. With the solution of estrone-ruthenium complex and **2**, the  $^{18}\text{F}$ -fluoride was eluted into a dram (3.7 mL) borosilicate vial. The cartridge was washed with DMSO (150  $\mu\text{L}$ ), followed by DMSO:MeCN (50  $\mu\text{L}$ , 1:1 (v/v)) and the radioactivity of the eluted solution was measured (a: 4.1 mCi, 0.15 GBq; b: 5.5 mCi, 0.20 GBq; c: 4.9 mCi, 0.18 GBq; d: 3.9 mCi, 0.14 GBq; e: 10.6 mCi, 392 MBq). The reaction vial, which contained 400  $\mu\text{L}$  of the reaction mixture, was sealed with a teflon-lined cap and heated at 125 °C for 30 min. The vials were allowed to stand for 3 min at 23 °C. The reaction mixture was analyzed by radio-HPLC and radio-TLC. The product **7d** was characterized by comparing the radio-HPLC traces of the reaction mixtures with the HPLC UV trace of the authentic reference sample.

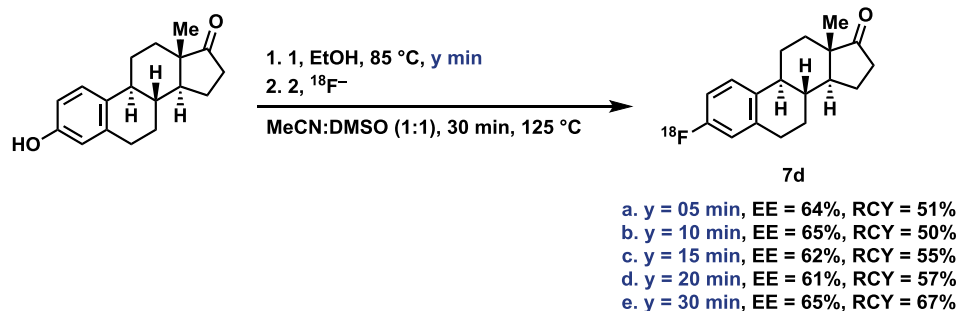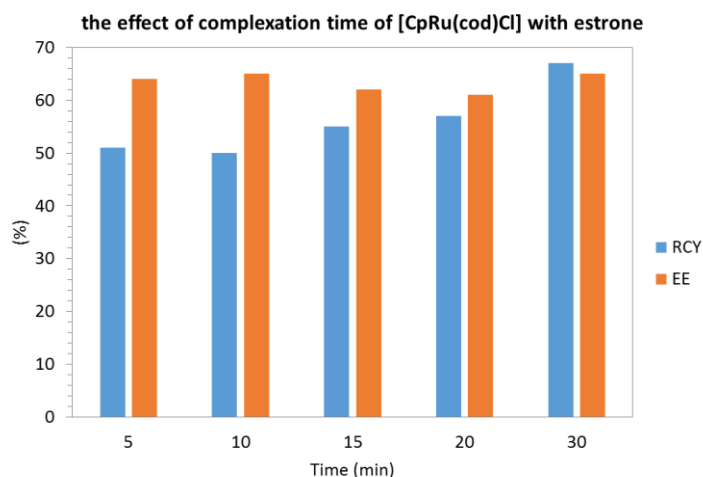

**Figure S1.** The effect of time on the complexation of [CpRu(cod)Cl] (1) complex with estrone on the [ $^{18}\text{F}$ ]deoxyfluorination, RCY estimated by TLC.

**Optimization of concentration:** The influence of concentration was studied by increasing the mass of estrone, [CpRu(cod)Cl] (1) and imidazolium chloride 2 by a factor of 1.5 and keeping the amount of solvent constant. No significant changes were observed within the chosen range (Scheme S2).

Estrone (a: 2.3 mg, 8.7  $\mu\text{mol}$ , 1.0 eq. or b: 3.5 mg, 13  $\mu\text{mol}$ , 1.0 eq.) and [CpRu(cod)Cl] (1) (a: 8.0 mg, 2.6  $\mu\text{mol}$ , 3.0 eq. or b: 12 mg, 39  $\mu\text{mol}$ , 3.0 eq.) were added to EtOH (50  $\mu\text{L}$ , a: c = 0.80 M and b: c = 1.2 M) in a 0.5 dram (1.8 mL) borosilicate glass vials. The vial was capped with a Teflon lined cap and the reaction mixture stirred at 85 °C (heating block temperature) for 30 min. The vial was allowed to stand for 3 min at 23 °C, then imidazolium chloride 2 (a: 14 mg, 26  $\mu\text{mol}$ , 3.0 eq. and b: 18 mg, 39  $\mu\text{mol}$ , 3.0 eq.) and 150  $\mu\text{L}$  of MeCN were added, and the resulting solution was drawn into a 1.0 mL polypropylene syringe for elution of fluoride.

$^{18}\text{F}$ -Fluoride solution from the cyclotron (approximately 7 mCi, 0.3 GBq) was loaded onto a QMA anion exchange cartridge (Chromafix 30-PS- $\text{HCO}_3$ ), and the trapped radioactivity was measured (a: 16.2 mCi, 599 MBq; b: 4.5 mCi, 0.17 GBq). The cartridge was washed with MeCN (1.0 mL), inverted and fitted with two

female x female Luer adapters. With the solution of estrone-ruthenium complex and **2**, the  $^{18}\text{F}$ -fluoride was eluted into a dram (3.7 mL) borosilicate vial. The cartridge was washed with DMSO (150  $\mu\text{L}$ ), followed by DMSO:MeCN (50  $\mu\text{L}$ , 1:1 (v/v)) and the radioactivity of the eluted solution was measured (a: 10.6 mCi, 392 MBq; b: 3.1 mCi, 0.12 GBq). The reaction vial, which contained 400  $\mu\text{L}$  of the reaction mixture, was sealed with a teflon-lined cap and heated at 125  $^{\circ}\text{C}$  for 30 min, and then allowed to stand for 3 min at 23  $^{\circ}\text{C}$ . The reaction mixture was analyzed by radio-HPLC and radio-TLC. The product **7d** was characterized by comparing the radio-HPLC trace of the reaction mixture with the HPLC UV trace of the authentic reference sample.

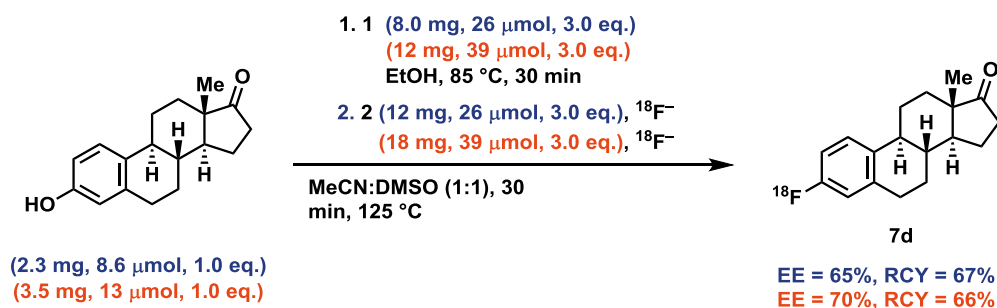

**Scheme S2.** The effect of increasing mass by a factor of 1.5 at constant volume on the [ $^{18}\text{F}$ ]deoxyfluorination of estrone as a phenol. RCY estimated by TLC.

**Effect of additives:** The additives were separately added prior to  $^{18}\text{F}$ -fluoride elution from the cartridge. We found that  $\text{Bu}_4\text{NHSO}_4$ ,  $\text{Bu}_4\text{NOTf}$ ,  $\text{Bu}_4\text{NNO}_3$  and  $\text{NEt}_4\text{HCO}_3$  increase the elution efficiency. However, the gain was offset by a decrease in radiochemical yield. (Scheme S3)

Estrone (2.3 mg, 8.7  $\mu\text{mol}$ , 1.0 eq.) and  $[\text{CpRu}(\text{cod})\text{Cl}]$  (**1**) (8.0 mg, 26  $\mu\text{mol}$ , 3.0 eq.) were added to EtOH (50  $\mu\text{L}$ ,  $c = 0.80\text{ M}$ ) in a 0.5 dram (1.8 mL) borosilicate glass vial. The vial was capped, and the reaction mixture was stirred at 85  $^{\circ}\text{C}$  (heating block temperature) for 30 min and then allowed to stand for 3 min at 23  $^{\circ}\text{C}$ . To the vial, imidazolium chloride **2** (14 mg, 26  $\mu\text{mol}$ , 3.0 eq.), additives (a: no additive; b:  $\text{Bu}_4\text{NHSO}_4$  (14 mg, 42  $\mu\text{mol}$ , 5.0 eq.); c:  $\text{Bu}_4\text{NOTf}$  (16 mg, 42  $\mu\text{mol}$ , 5.0 eq.); d:  $\text{Bu}_4\text{NNO}_3$  (13 mg, 42  $\mu\text{mol}$ , 5.0 eq.) and e:  $\text{Et}_4\text{NHCO}_3$  (10 mg, 42  $\mu\text{mol}$ , 5.0 eq.)) and 150  $\mu\text{L}$  of MeCN were added, and the resulting solution was drawn into a 1.0 mL polypropylene syringe for elution of fluoride.

$^{18}\text{F}$ -fluoride solution from the cyclotron was loaded onto a QMA anion exchange cartridge (Chromafix 30-PS- $\text{HCO}_3$ ), and the trapped radioactivity was measured (a: 5.1 mCi, 0.19 GBq; b: 7.4 mCi, 0.27 GBq; c: 7.3 mCi, 0.27 GBq; d: 5.8 mCi, 0.22 GBq; e: 7.8 mCi, 0.29 GBq). The cartridge was washed with MeCN (1.0 mL). The cartridge was inverted and fitted with a female x female Luer adapter. With the syringes containing the solution of estrone-ruthenium complex, additives and **2**, the  $^{18}\text{F}$ -fluoride was eluted into a 1 dram (3.7 mL) borosilicate vials. The cartridge was washed with DMSO (150  $\mu\text{L}$ ), followed by DMSO:MeCN (50  $\mu\text{L}$ , 1:1

(v/v)) and the radioactivity of the eluted solution was measured (a: 3.5 mCi, 0.13 GBq; b: 5.0 mCi, 0.19 GBq; c: 5.9 mCi, 0.22 GBq; d: 4.6 mCi, 0.17 GBq; e: 7.0 mCi, 0.26 GBq). The reaction vial, which contained 400  $\mu\text{L}$  of the reaction mixture, was sealed with a teflon-lined cap and heated at 125  $^{\circ}\text{C}$  for 30 min, then allowed to stand for 3 min at 23  $^{\circ}\text{C}$ . The reaction mixture was analyzed by radio-HPLC and radio-TLC. The product **7d** was characterized by comparing the radio-HPLC trace of the reaction mixture with the HPLC UV trace of the authentic reference sample.

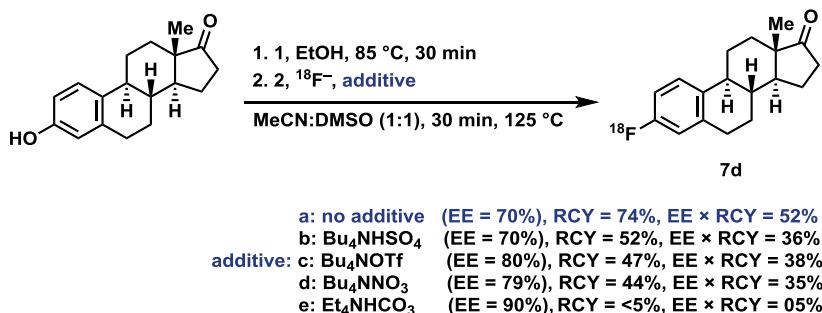

**Scheme S3.** The effect of additive salts on the efficiency of [ $^{18}\text{F}$ ]deoxyfluorination of estrone as a phenol. RCY estimated by TLC.

**Optimization of ethanol content:** Ruthenium-phenol complex formation with  $[\text{CpRu}(\text{cod})\text{Cl}]$  (**1**) was carried out in EtOH. We found the presence of EtOH also significantly increases the elution efficiency of  $^{18}\text{F}$ -fluoride. Therefore, we decided to investigate the effect of EtOH content in the reaction mixture on the radiochemical yield.

The overall TLC yields for EtOH = 0–30% are in the same range (EE × RCY = 20–30%) and above EtOH% = 30%, EtOH dramatically lowers the overall yield. (Figure S2)

For all reactions except 0% EtOH, the elution was performed with only EtOH (but different volumes depending on EtOH percentage), and the remaining solvent (DMSO:MeCN 1:1) added after the elution; For the first entry in the chart (0% EtOH), after the complexation step, EtOH was evaporated and exchanged with MeCN:DMSO (1:1).

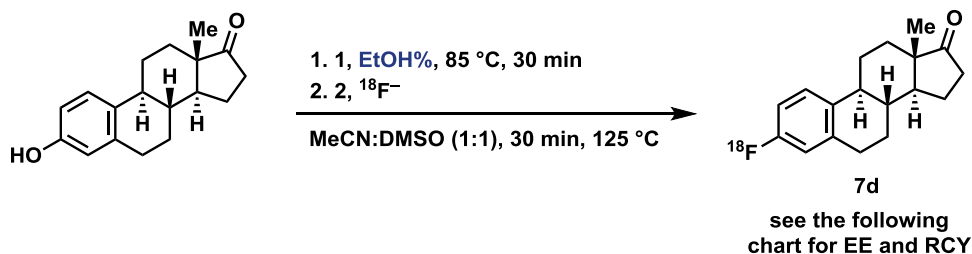

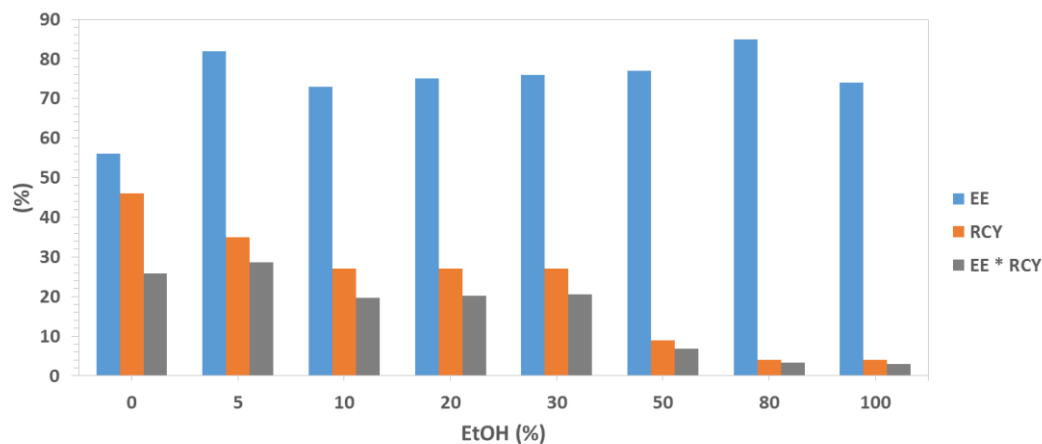

**Figure S2.** Effect of EtOH on the EE, RCY and the estimated overall yield (EE × RCY) on the [<sup>18</sup>F]deoxyfluorination of estrone as a phenol.

For comparability, the volume of the reaction mixtures mentioned in Figure S2 were kept all constant (2 ml) to optimize the ethanol content. However, a reduction of volume from 2 mL to 400  $\mu$ L, the overall yield from ca. 25% was increased to ca. 45% for the reaction without ethanol. (Figure S3) As extremely low amounts (<50  $\mu$ L) of ethanol make the elution practically challenging, we reduced our overall volume to 400  $\mu$ L with 12.5% EtOH.

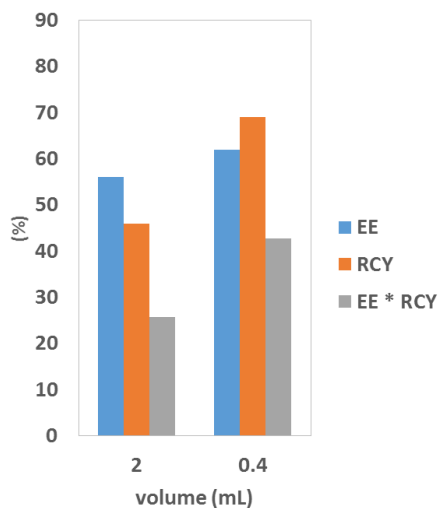

**Figure S3.** The effect of reaction volume on the reactions occurring in MeCN:DMSO (1:1) (0% EtOH) on the [<sup>18</sup>F]deoxyfluorination of estrone as a phenol. The left is for the reaction in a total volume of 2 mL and the right is the reaction for a total volume of 400  $\mu$ L.

### General procedure for [ $^{18}\text{F}$ ]deoxyfluorination of phenols

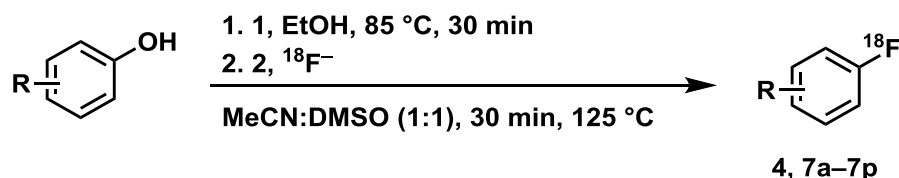

A phenol (8.7  $\mu\text{mol}$ , 1.0 eq.) and [CpRu(cod)Cl] (**1**) (8.0 mg, 26  $\mu\text{mol}$ , 3.0 eq.) were added to EtOH (50  $\mu\text{L}$ ,  $c = 0.80 \text{ M}$ ) in a 0.5 dram (1.8 mL) borosilicate glass vial. The vial was capped, and the reaction mixture was stirred at 85  $^\circ\text{C}$  for 30 min. The vial was removed from the heating block and allowed to stand for 3 min at 23  $^\circ\text{C}$ . To the vial, imidazolium chloride **2** (12 mg, 26  $\mu\text{mol}$ , 3.0 eq.) and 150  $\mu\text{L}$  of MeCN were added, and the resulting solution was drawn into a 1.0 mL polypropylene syringe.

Target water from the cyclotron containing  $^{18}\text{F}$ -fluoride (typically 50  $\mu\text{L}$ ) was loaded with a syringe onto a QMA anion exchange cartridge (Chromafix 30-PS- $\text{HCO}_3$ ) and the radioactivity of the trapped  $^{18}\text{F}$ -fluoride was measured (Table S1). The cartridge was washed with MeCN (1.0 mL). The cartridge was inverted and fitted with a female x female Luer adapter. With the syringe, which contained the corresponding solution of phenol-ruthenium complex and **2**, the  $^{18}\text{F}$ -fluoride was eluted into a 1 dram (3.7 mL) borosilicate vial. The cartridge was washed with DMSO (150  $\mu\text{L}$ ), followed by DMSO:MeCN (50  $\mu\text{L}$ , 1:1 (v/v)) and the radioactivity of the eluted solution was measured (Table S1). The reaction vial, which contained 400  $\mu\text{L}$  of the reaction mixture was sealed with a teflon-lined cap and was heated at 125  $^\circ\text{C}$  for 30 min. The vial, which contained the reaction mixture was removed from the heat and was allowed to stand for 3 min at 23  $^\circ\text{C}$ . The reaction mixture was analyzed by radio-HPLC and radio-TLC. The products were characterized by comparing the radio-HPLC trace of the reaction mixtures with the HPLC UV traces of the authentic reference samples, respectively.

All  $^{18}\text{F}$ -labeled molecules were characterized by comparing the retention time of the product ( $\gamma$ -trace) to the retention time of an authentic reference sample. Note: radioactivity chromatographs are offset by 0.15 min on account of the delay introduced by the spatial separation between the diode array detector and the radioactivity detector.

**Table S1.** The amounts of initial radioactivity trapped, the amount eluted, and the RCYs of [ $^{18}\text{F}$ ]deoxyfluorination of phenols, estimated by TLC.

| Entry | Product  | Initial radioactivity (mCi, GBq) | Eluted radioactivity (mCi, GBq) | Elution efficiency (%) | RCY (%) |
|-------|----------|----------------------------------|---------------------------------|------------------------|---------|
| 1     | <b>4</b> | 8.0, 0.30                        | 5.1, 0.19                       | 64                     | 67      |



|    |           |            |           |    |    |
|----|-----------|------------|-----------|----|----|
| 2  | <b>7a</b> | 7.5, 0.28  | 4.9, 0.18 | 66 | 89 |
| 3  | <b>7b</b> | 5.9, 0.22  | 4.4, 0.16 | 75 | 85 |
| 4  | <b>7c</b> | 5.2, 0.19  | 3.3, 0.12 | 63 | 99 |
| 5  | <b>7d</b> | 6.2, 0.23  | 4.6, 0.17 | 73 | 88 |
| 6  | <b>7e</b> | 4.2, 0.16  | 3.0, 0.11 | 71 | 30 |
| 7  | <b>7f</b> | 4.3, 0.16  | 2.7, 0.10 | 64 | 82 |
| 8  | <b>7g</b> | 6.9, 0.26  | 4.0, 0.15 | 58 | 10 |
| 9  | <b>7h</b> | 5.9, 0.22  | 3.9, 0.14 | 66 | 98 |
| 10 | <b>7i</b> | 5.6, 0.21  | 3.1, 0.12 | 55 | 99 |
| 11 | <b>7j</b> | 7.2, 0.27  | 4.8, 0.18 | 67 | 99 |
| 12 | <b>7k</b> | 6.0, 0.22  | 4.6, 0.17 | 77 | 85 |
| 13 | <b>7l</b> | 6.5, 0.24  | 3.5, 0.13 | 54 | 80 |
| 14 | <b>7m</b> | 5.1, 0.20  | 3.5, 0.13 | 67 | 43 |
| 15 | <b>7n</b> | 7.3, 0.27  | 4.6, 0.17 | 62 | 99 |
| 16 | <b>7o</b> | 10.7, 0.40 | 6.8, 0.25 | 64 | 88 |
| 17 | <b>7p</b> | 6.0, 0.22  | 3.0, 0.11 | 49 | 62 |

### **[<sup>18</sup>F]-β-CFT (4)**

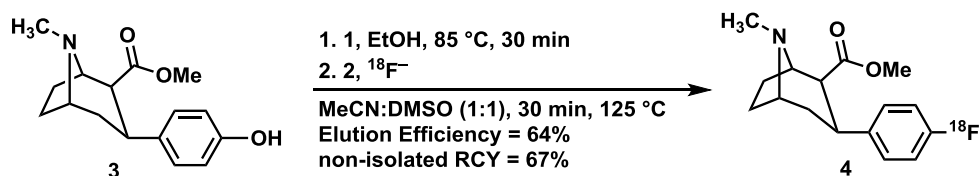

Phenol **3** (3.9 mg, 8.7 μmol, 1.0 eq.) and [CpRu(cod)Cl] (**1**) (8.0 mg, 26 μmol, 3.0 eq.) were added to EtOH (50 μL, c = 0.80 M) in a 0.5 dram (1.8 mL) borosilicate glass vial. The vial was capped, and the reaction

mixture was stirred at 85 °C (heating block temperature) for 30 min. The vial was removed from the heating block and allowed to stand for 3 min at 23 °C. To the vial, imidazolium chloride **2** (14 mg, 26 μmol, 3.0 eq.) and 150 μL of MeCN were added, and the resulting solution was drawn into a 1.0 mL polypropylene syringe.

Target water from the cyclotron containing  $^{18}\text{F}$ -fluoride was loaded with a syringe onto a QMA anion exchange cartridge (Chromafix 30-PS- $\text{HCO}_3$ ) and the radioactivity of the trapped  $^{18}\text{F}$ -fluoride was measured (8.0 mCi, 0.30 GBq). The cartridge was washed with MeCN (1.0 mL). The cartridge was inverted and fitted with a female x female Luer adapter. With the syringe, which contained the corresponding solution of **3**-ruthenium complex and **2**, the  $^{18}\text{F}$ -fluoride was eluted into a 1 dram (3.7 mL) borosilicate vial. The cartridge was washed with DMSO (150 μL), followed by DMSO:MeCN (50 μL, 1:1 (v/v)) and the radioactivity of the eluted solution was measured (5.1 mCi, 0.19 GBq). The reaction vial, which contained 400 μL of the reaction mixture was sealed with a teflon-lined cap and was heated at 125 °C for 30 min. The vial, which contained the reaction mixture was removed from the heat and was allowed to stand for 3 min at 23 °C. The reaction mixture was analyzed by radio-HPLC and radio-TLC. The product [ $^{18}\text{F}$ ]- $\beta$ -CFT (**4**) was characterized by comparing the radio-HPLC trace of the reaction mixture with the HPLC UV traces of the authentic reference sample. The authentic reference ( $\beta$ -CFT) (5 mg) was purchased from Sigma-Aldrich as  $\beta$ -CFT naphthalenedisulfonate monohydrate and then the naphthalenedisulfonate was removed from the sample using 5 coupled Sep-Pak Plus C18 Environmental Cartridges (WAT036800) from Waters connected in series. The sample was loaded onto the C18 cartridges, and a HPLC pump was used for elution with the following mobile phases: 0.1% formic acid in water (A), 0.1% formic acid in acetonitrile (B). Program: starting from 5% (B) to 95% (B) as a gradient over 12 min with flow rate 4.0 mL/min.

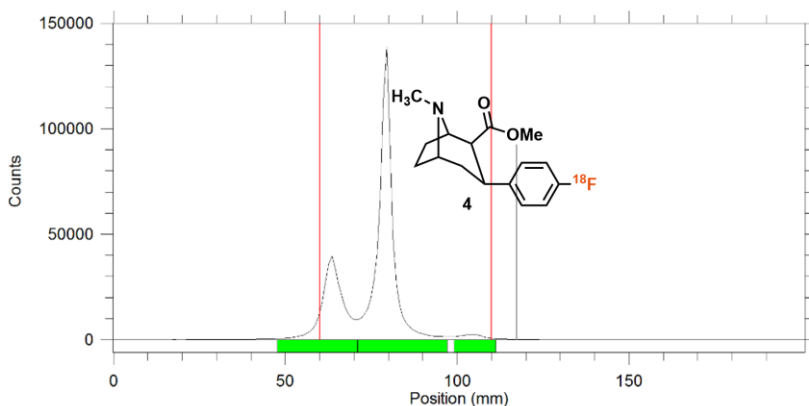

**Figure S4.** Radio-TLC trace of the [ $^{18}\text{F}$ ]deoxyfluorination reaction of **3** yielding **4**.

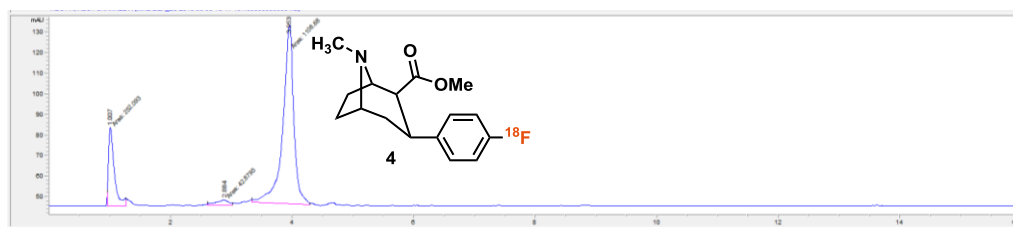

**Figure S5.** Radio-HPLC trace of the [ $^{18}\text{F}$ ]deoxyfluorination reaction of **3** yielding **4**.

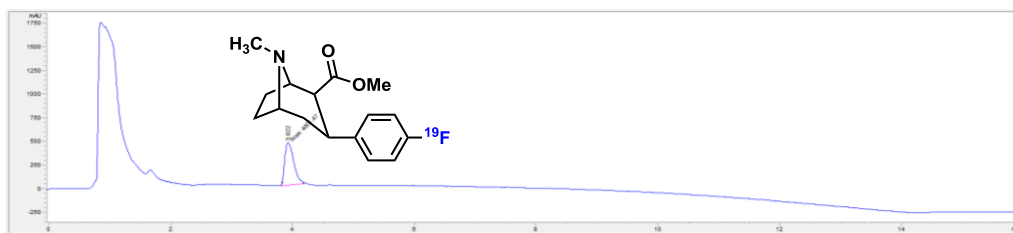

**Figure S6.** UV-HPLC trace of  $\beta$ -CFT as the reference.

### [ $^{18}\text{F}$ ]1-(Fluoro)-4-methoxybenzene (**7a**)

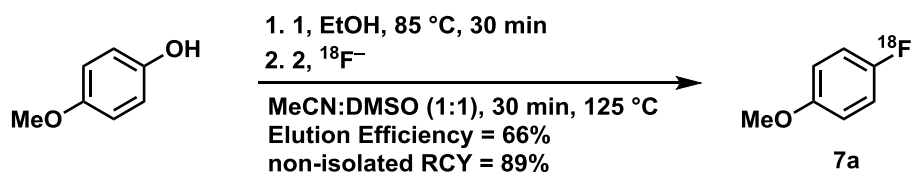

4-Methoxyphenol (1.1 mg, 8.7  $\mu\text{mol}$ , 1.0 eq.) and [CpRu(cod)Cl] (**1**) (8.0 mg, 26  $\mu\text{mol}$ , 3.0 eq.) were added to EtOH (50  $\mu\text{L}$ ,  $c = 0.80\text{ M}$ ) in a 0.5 dram (1.8 mL) borosilicate glass vial. The vial was capped, and the reaction mixture was stirred at 85 °C (heating block temperature) for 30 min. The vial was removed from the heating block and allowed to stand for 3 min at 23 °C. To the vial, imidazolium chloride (**2**) (14 mg, 26  $\mu\text{mol}$ , 3.0 eq.) and 150  $\mu\text{L}$  of MeCN were added, and the resulting solution was drawn into a 1.0 mL polypropylene syringe.

Target water from the cyclotron containing  $^{18}\text{F}$ -fluoride was loaded with a syringe onto a QMA anion exchange cartridge (Chromafix 30-PS- $\text{HCO}_3$ ) and the radioactivity of the trapped  $^{18}\text{F}$ -fluoride was measured (7.5 mCi, 0.28 GBq). The cartridge was washed with MeCN (1.0 mL). The cartridge was inverted and fitted with a female x female Luer adapter. With the syringe, which contained the corresponding solution of 4-methoxyphenol-ruthenium complex and **2**, the  $^{18}\text{F}$ -fluoride was eluted into a 1 dram (3.7 mL) borosilicate vial. The cartridge was washed with DMSO (150  $\mu\text{L}$ ), followed by DMSO:MeCN (50  $\mu\text{L}$ , 1:1 (v/v)) and the radioactivity of the eluted solution was measured (4.9 mCi, 0.18 GBq). The reaction vial, which contained 400  $\mu\text{L}$  of the reaction mixture was sealed with a teflon-lined cap and was heated at 125 °C for 30 min. The vial, which contained the reaction mixture was removed from the heat and was allowed to stand for 3 min at 23 °C. The reaction mixture was analyzed by radio-HPLC and radio-TLC. The product **7a** was characterized by

comparing the radio-HPLC trace of the reaction mixture with the HPLC UV traces of the authentic reference sample.

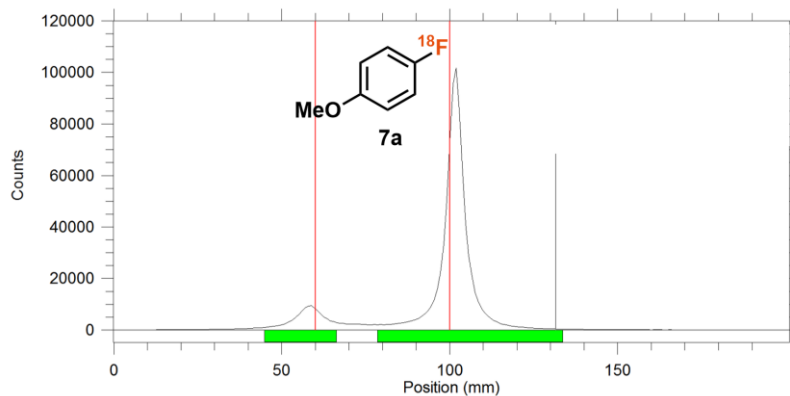

**Figure S7.** Radio-TLC trace of the [ $^{18}\text{F}$ ]deoxyfluorination reaction of 4-methoxyphenol yielding **7a**.

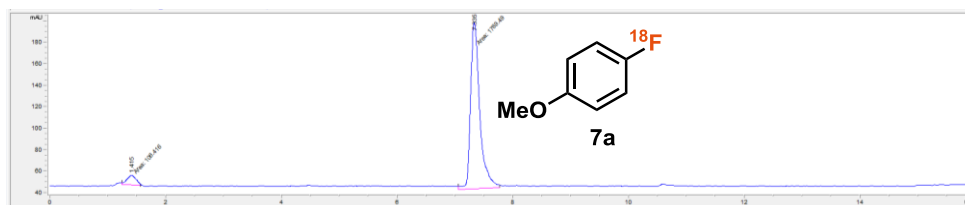

**Figure S8.** Radio-HPLC trace of the [ $^{18}\text{F}$ ]deoxyfluorination reaction of 4-methoxyphenol yielding **7a**.

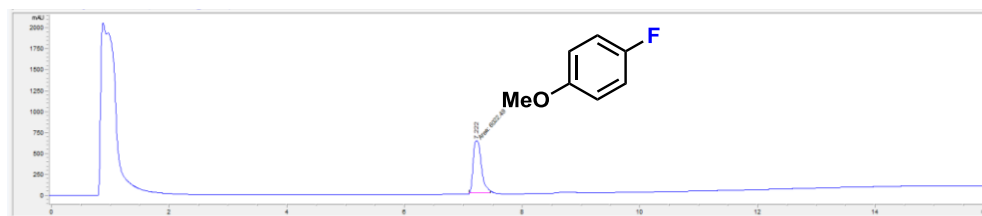

**Figure S9.** UV-HPLC trace of 1-fluoro-4-methoxybenzene as the reference.

### [ $^{18}\text{F}$ ]Benzylpiperazin **7b**

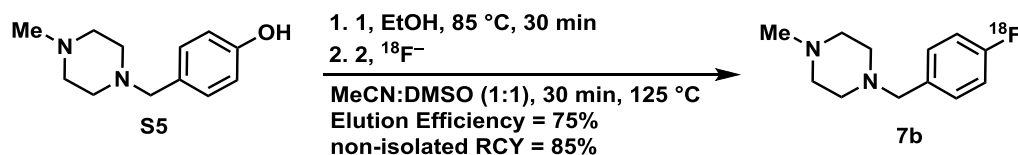

Phenol **S5** (1.7 mg, 8.7  $\mu\text{mol}$ , 1.0 eq.) and [CpRu(cod)Cl] (**1**) (8.0 mg, 26  $\mu\text{mol}$ , 3.0 eq.) were added to EtOH (50  $\mu\text{L}$ ,  $c = 0.80 \text{ M}$ ) in a 0.5 dram (1.8 mL) borosilicate glass vial. The vial was capped, and the reaction

mixture was stirred at 85 °C (heating block temperature) for 30 min. The vial was removed from the heating block and allowed to stand for 3 min at 23 °C. To the vial, imidazolium chloride **2** (14 mg, 26 μmol, 3.0 eq.) and 150 μL of MeCN were added, and the resulting solution was drawn into a 1.0 mL polypropylene syringe.

Target water from the cyclotron containing  $^{18}\text{F}$ -fluoride was loaded with a syringe onto a QMA anion exchange cartridge (Chromafix 30-PS- $\text{HCO}_3$ ) and the radioactivity of the trapped  $^{18}\text{F}$ -fluoride was measured (5.9 mCi, 0.22 GBq). The cartridge was washed with MeCN (1.0 mL). The cartridge was inverted and fitted with a female x female Luer adapter. With the syringe, which contained the corresponding solution of **S5**-ruthenium complex and **2**, the  $^{18}\text{F}$ -fluoride was eluted into a 1 dram (3.7 mL) borosilicate vial. The cartridge was washed with DMSO (150 μL), followed by DMSO:MeCN (50 μL, 1:1 (v/v)) and the radioactivity of the eluted solution was measured (4.4 mCi, 0.16 GBq). The reaction vial, which contained 400 μL of the reaction mixture was sealed with a teflon-lined cap and was heated at 125 °C for 30 min. The vial, which contained the reaction mixture was removed from the heat and was allowed to stand for 3 min at 23 °C. The reaction mixture was analyzed by radio-HPLC and radio-TLC. The product **7b** was characterized by comparing the radio-HPLC trace of the reaction mixture with the HPLC UV traces of the authentic reference sample.

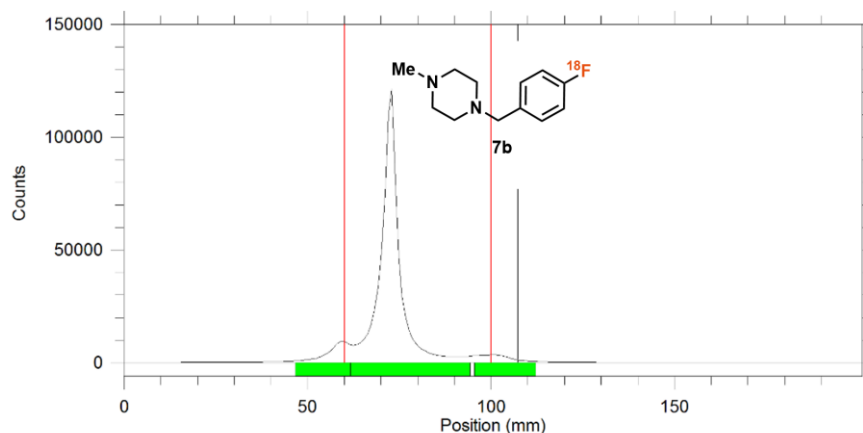

**Figure S10.** Radio-TLC trace of the [ $^{18}\text{F}$ ]deoxyfluorination reaction of **S5** yielding **7b**.

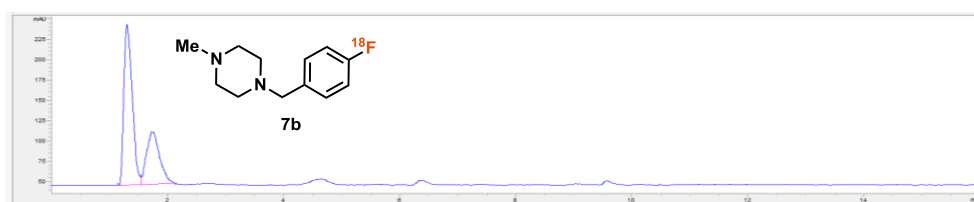

**Figure S11.** Radio-HPLC trace of the [ $^{18}\text{F}$ ]deoxyfluorination reaction of **S5** yielding **7b**.

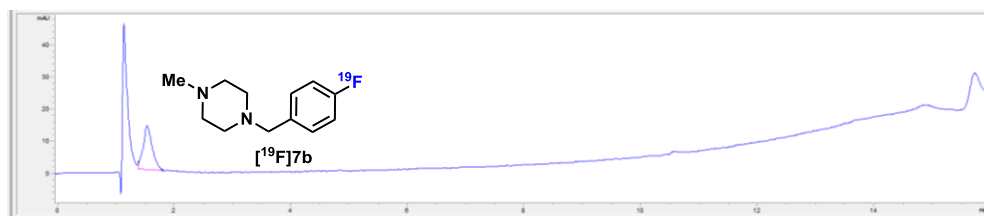

**Figure S12.** UV-HPLC trace of [ $^{19}\text{F}$ ]7b as the reference.

### [ $^{18}\text{F}$ ]Piperazin 7c

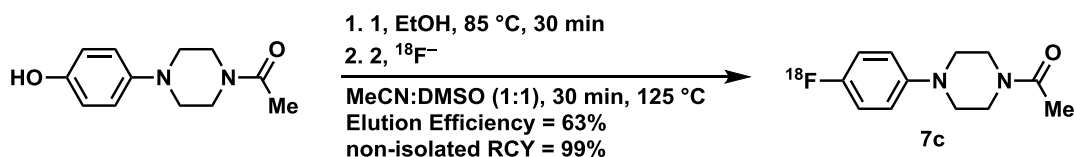

1-(4-(4-Hydroxyphenyl)piperazin-1-yl)ethan-1-one (1.9 mg, 8.7  $\mu\text{mol}$ , 1.0 eq.) and [CpRu(cod)Cl] (**1**) (8.0 mg, 26  $\mu\text{mol}$ , 3.0 eq.) were added to EtOH (50  $\mu\text{L}$ ,  $c = 0.80\text{ M}$ ) in a 0.5 dram (1.8 mL) borosilicate glass vial. The vial was capped, and the reaction mixture was stirred at 85 °C (heating block temperature) for 30 min. The vial was removed from the heating block and allowed to stand for 3 min at 23 °C. To the vial, imidazolium chloride **2** (14 mg, 26  $\mu\text{mol}$ , 3.0 eq.) and 150  $\mu\text{L}$  of MeCN were added, and the resulting solution was drawn into a 1.0 mL polypropylene syringe.

Target water from the cyclotron containing  $^{18}\text{F}$ -fluoride was loaded with a syringe onto a QMA anion exchange cartridge (Chromafix 30-PS- $\text{HCO}_3$ ) and the radioactivity of the trapped  $^{18}\text{F}$ -fluoride was measured (5.2 mCi, 0.19 GBq). The cartridge was washed with MeCN (1.0 mL). The cartridge was inverted and fitted with a female x female Luer adapter. With the syringe, which contained the corresponding solution of 1-(4-(4-hydroxyphenyl)piperazin-1-yl)ethan-1-one-ruthenium complex and **2**, the  $^{18}\text{F}$ -fluoride was eluted into a 1 dram (3.7 mL) borosilicate vial. The cartridge was washed with DMSO (150  $\mu\text{L}$ ), followed by DMSO:MeCN (50  $\mu\text{L}$ , 1:1 (v/v)) and the radioactivity of the eluted solution was measured (3.3 mCi, 0.12 GBq). The reaction vial, which contained 400  $\mu\text{L}$  of the reaction mixture was sealed with a teflon-lined cap and was heated at 125 °C for 30 min. The vial, which contained the reaction mixture was removed from the heat and was allowed to stand for 3 min at 23 °C. The reaction mixture was analyzed by radio-HPLC and radio-TLC. The product **7c** was characterized by comparing the radio-HPLC trace of the reaction mixture with the HPLC UV traces of the authentic reference sample.

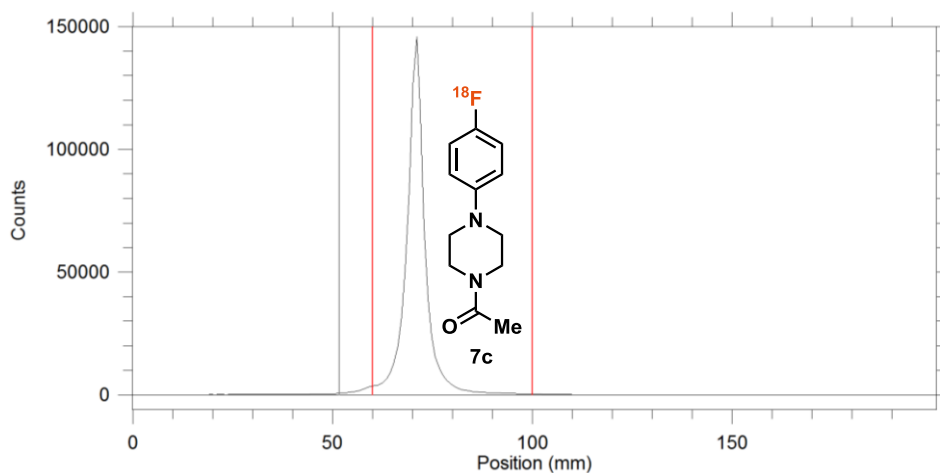

**Figure S13.** Radio-TLC trace of the [<sup>18</sup>F]deoxyfluorination reaction of 1-(4-(4-hydroxyphenyl)piperazin-1-yl)ethan-1-one yielding **7c**.

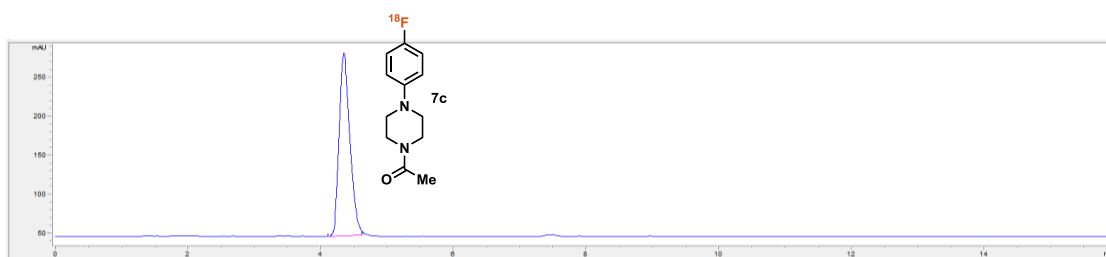

**Figure S14.** Radio-HPLC trace of the [<sup>18</sup>F]deoxyfluorination reaction of 1-(4-(4-hydroxyphenyl)piperazin-1-yl)ethan-1-one yielding **7c**.

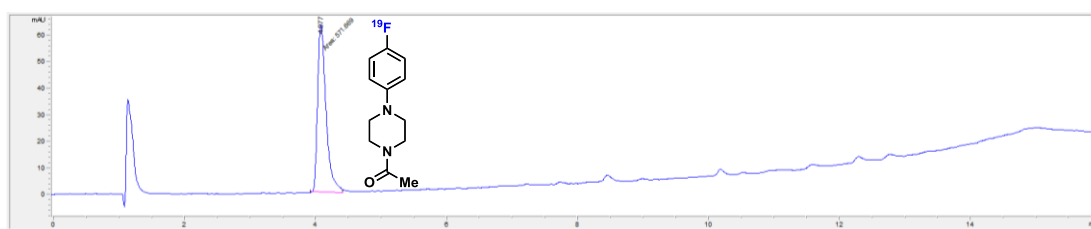

**Figure S15.** UV-HPLC trace of 1-(4-(4-fluorophenyl)piperazin-1-yl)ethan-1-one as the reference.

### [<sup>18</sup>F]Estrone **7d**

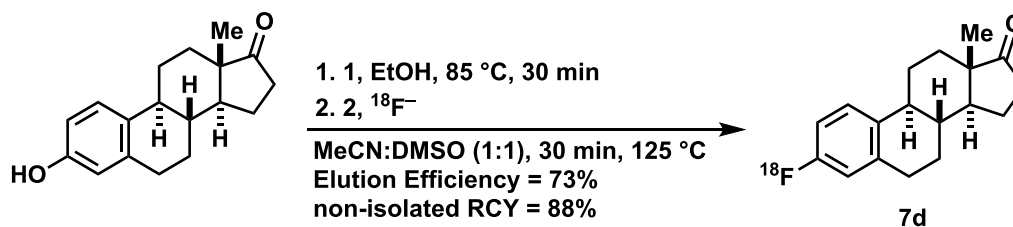

Estrone (2.3 mg, 8.7  $\mu\text{mol}$ , 1.0 eq.) and [CpRu(cod)Cl] (**1**) (8.0 mg, 26  $\mu\text{mol}$ , 3.0 eq.) were added to EtOH (50  $\mu\text{L}$ ,  $c = 0.80\text{ M}$ ) in a 0.5 dram (1.8 mL) borosilicate glass vial. The vial was capped, and the reaction mixture was stirred at 85  $^{\circ}\text{C}$  (heating block temperature) for 30 min. The vial was removed from the heating block and allowed to stand for 3 min at 23  $^{\circ}\text{C}$ . To the vial, imidazolium chloride **2** (14 mg, 26  $\mu\text{mol}$ , 3.0 eq.) and 150  $\mu\text{L}$  of MeCN were added, and the resulting solution was drawn into a 1.0 mL polypropylene syringe.

Target water from the cyclotron containing  $^{18}\text{F}$ -fluoride was loaded with a syringe onto a QMA anion exchange cartridge (Chromafix 30-PS- $\text{HCO}_3$ ) and the radioactivity of the trapped  $^{18}\text{F}$ -fluoride was measured (6.2 mCi, 0.23 GBq). The cartridge was washed with MeCN (1.0 mL). The cartridge was inverted and fitted with a female  $\times$  female Luer adapter. With the syringe, which contained the corresponding solution of estrone-ruthenium complex and **2**, the  $^{18}\text{F}$ -fluoride was eluted into a 1 dram (3.7 mL) borosilicate vial. The cartridge was washed with DMSO (150  $\mu\text{L}$ ), followed by DMSO:MeCN (50  $\mu\text{L}$ , 1:1 (v/v)) and the radioactivity of the eluted solution was measured (4.6 mCi, 0.17 GBq). The reaction vial, which contained 400  $\mu\text{L}$  of the reaction mixture was sealed with a teflon-lined cap and was heated at 125  $^{\circ}\text{C}$  for 30 min. The vial, which contained the reaction mixture was removed from the heat and was allowed to stand for 3 min at 23  $^{\circ}\text{C}$ . The reaction mixture was analyzed by radio-HPLC and radio-TLC. The product **7d** was characterized by comparing the radio-HPLC trace of the reaction mixture with the HPLC UV traces of the authentic reference sample.

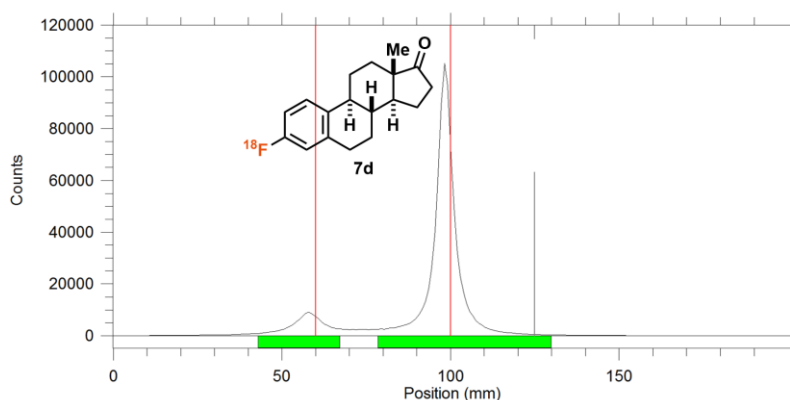

**Figure S16.** Radio-TLC trace of the [ $^{18}\text{F}$ ]deoxyfluorination reaction of estrone yielding **7d**.

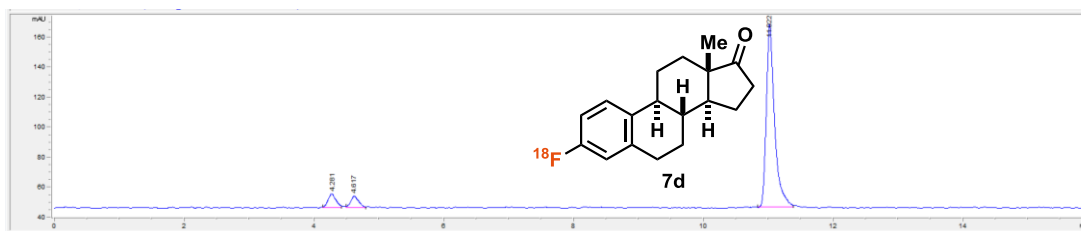

**Figure S17.** Radio-HPLC trace of the [ $^{18}\text{F}$ ]deoxyfluorination reaction of estrone yielding **7d**.



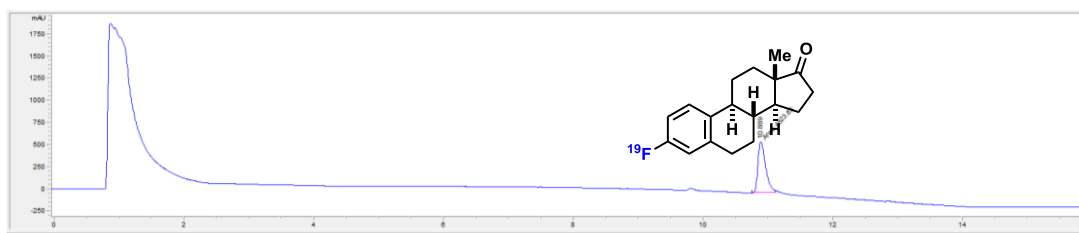

**Figure S18.** UV-HPLC trace of deoxyfluorinated estrone as the reference.

### [<sup>18</sup>F]4-(Fluoro)phenylmethanamine (**7e**)

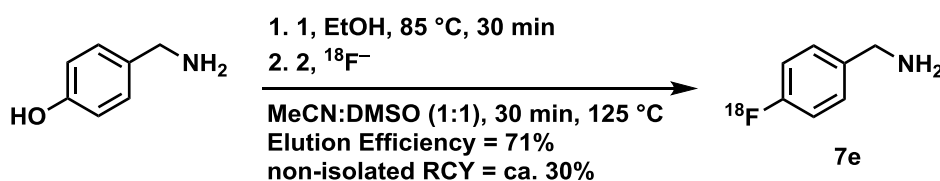

4-(Aminomethyl)phenol (1.1 mg, 8.7 μmol, 1.0 eq.) and [CpRu(cod)Cl] (**1**) (8.0 mg, 26 μmol, 3.0 eq.) were added to EtOH (50 μL, c = 0.80 M) in a 0.5 dram (1.8 mL) borosilicate glass vial. The vial was capped, and the reaction mixture was stirred at 85 °C (heating block temperature) for 30 min. The vial was removed from the heating block and allowed to stand for 3 min at 23 °C. To the vial, imidazolium chloride **2** (14 mg, 26 μmol, 3.0 eq.) and 150 μL of MeCN were added, and the resulting solution was drawn into a 1.0 mL polypropylene syringe.

Target water from the cyclotron containing <sup>18</sup>F-fluoride was loaded with a syringe onto a QMA anion exchange cartridge (Chromafix 30-PS-HCO<sub>3</sub>) and the radioactivity of the trapped <sup>18</sup>F-fluoride was measured (4.2 mCi, 0.16 GBq). The cartridge was washed with MeCN (1.0 mL). The cartridge was inverted and fitted with a female x female Luer adapter. With the syringe, which contained the corresponding solution of 4-(aminomethyl)phenol-ruthenium complex and **2**, the <sup>18</sup>F-fluoride was eluted into a 1 dram (3.7 mL) borosilicate vial. The cartridge was washed with DMSO (150 μL), followed by DMSO:MeCN (50 μL, 1:1 (v/v)) and the radioactivity of the eluted solution was measured (3.0 mCi, 0.11 GBq). The reaction vial, which contained 400 μL of the reaction mixture was sealed with a teflon-lined cap and was heated at 125 °C for 30 min. The vial, which contained the reaction mixture was removed from the heat and was allowed to stand for 3 min at 23 °C. The reaction mixture was analyzed by radio-HPLC and radio-TLC. The product **7e** was characterized by comparing the radio-HPLC trace of the reaction mixture with the HPLC UV traces of the authentic reference sample.

Note: Lewis basic compounds, such as amines, can form unproductive ruthenium coordination compounds. These are typically visible by HPLC as broad peaks within the first minutes after the solvent front. We attribute the relatively low yield of **7e** to the formation of such compounds and consequently suggest

protection of primary amines, despite fundamental compatibility with the reaction

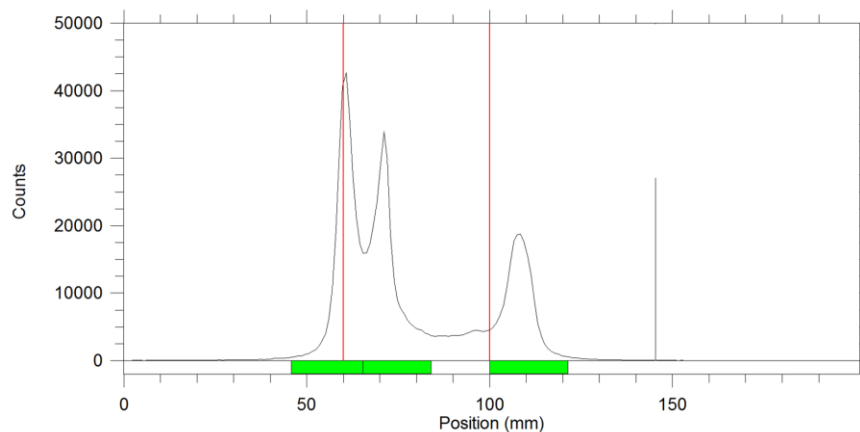

**Figure S19.** Radio-TLC trace of the [ $^{18}\text{F}$ ]deoxyfluorination reaction of 4-(aminomethyl)phenol yielding **7e**.

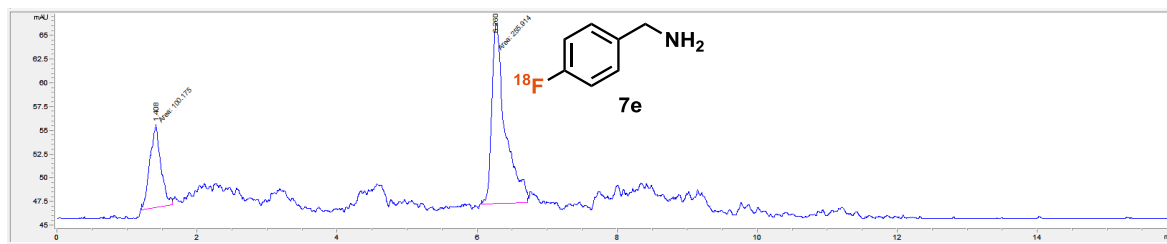

**Figure S20.** Radio-HPLC trace of the [ $^{18}\text{F}$ ]deoxyfluorination reaction of 4-(aminomethyl)phenol yielding **7e**.

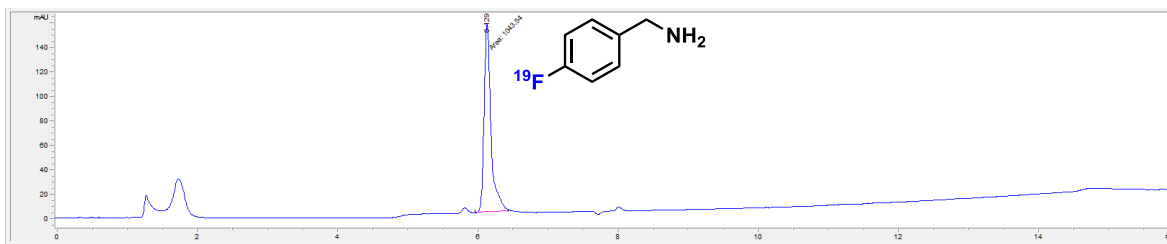

**Figure S21.** UV-HPLC trace of (4-fluorophenyl)methanamine as the reference.

**[ $^{18}\text{F}$ ]Ethyl 3-(fluoro)-9*H*-carbazole-9-carboxylate (**7f**)**

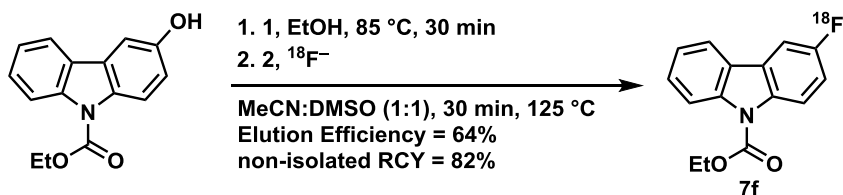

Ethyl 3-hydroxy-9*H*-carbazole-9-carboxylate (2.2 mg, 8.7  $\mu\text{mol}$ , 1.0 eq.) and [CpRu(cod)Cl] (**1**) (8.0 mg, 26  $\mu\text{mol}$ , 3.0 eq.) were added to EtOH (50  $\mu\text{L}$ ,  $c = 0.80\text{ M}$ ) in a 0.5 dram (1.8 mL) borosilicate glass vial. The vial was capped, and the reaction mixture was stirred at 85  $^{\circ}\text{C}$  (heating block temperature) for 30 min. The vial was removed from the heating block and allowed to stand for 3 min at 23  $^{\circ}\text{C}$ . To the vial, imidazolium chloride **2** (14 mg, 26  $\mu\text{mol}$ , 3.0 eq.) and 150  $\mu\text{L}$  of MeCN were added, and the resulting solution was drawn into a 1.0 mL polypropylene syringe.

Target water from the cyclotron containing  $^{18}\text{F}$ -fluoride was loaded with a syringe onto a QMA anion exchange cartridge (Chromafix 30-PS- $\text{HCO}_3$ ) and the radioactivity of the trapped  $^{18}\text{F}$ -fluoride was measured (4.3 mCi, 0.16 GBq). The cartridge was washed with MeCN (1.0 mL). The cartridge was inverted and fitted with a female x female Luer adapter. With the syringe, which contained the corresponding solution of ethyl 3-hydroxy-9*H*-carbazole-9-carboxylate-ruthenium complex and **2**, the  $^{18}\text{F}$ -fluoride was eluted into a 1 dram (3.7 mL) borosilicate vial. The cartridge was washed with DMSO (150  $\mu\text{L}$ ), followed by DMSO:MeCN (50  $\mu\text{L}$ , 1:1 (v/v)) and the radioactivity of the eluted solution was measured (2.7 mCi, 0.10 GBq). The reaction vial, which contained 400  $\mu\text{L}$  of the reaction mixture was sealed with a teflon-lined cap and was heated at 125  $^{\circ}\text{C}$  for 30 min. The vial, which contained the reaction mixture was removed from the heat and was allowed to stand for 3 min at 23  $^{\circ}\text{C}$ . The reaction mixture was analyzed by radio-HPLC and radio-TLC. The product **7f** was characterized by comparing the radio-HPLC trace of the reaction mixture with the HPLC UV traces of the authentic reference sample.

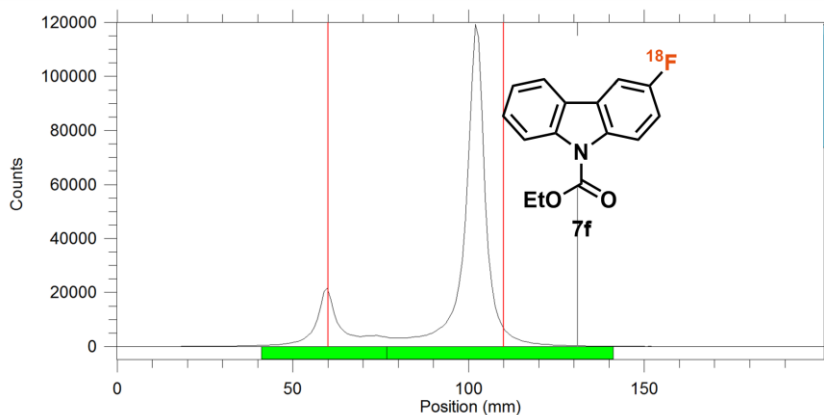

**Figure S22.** Radio-TLC trace of the [ $^{18}\text{F}$ ]deoxyfluorination reaction of ethyl 3-hydroxy-9*H*-carbazole-9-carboxylate yielding **7f**.

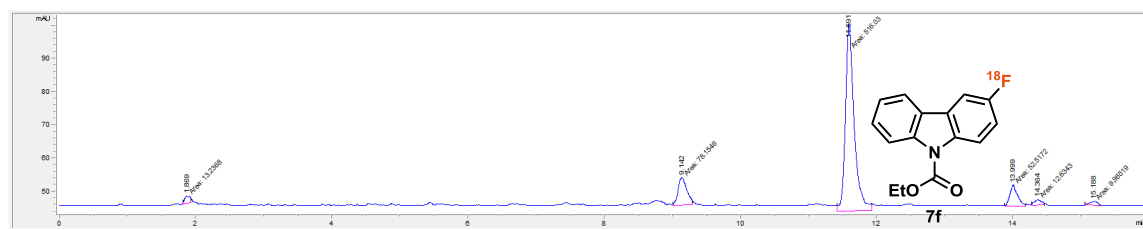

**Figure S23.** Radio-HPLC trace of the [ $^{18}\text{F}$ ]deoxyfluorination reaction of ethyl 3-hydroxy-9*H*-carbazole-9-carboxylate yielding **7f**.

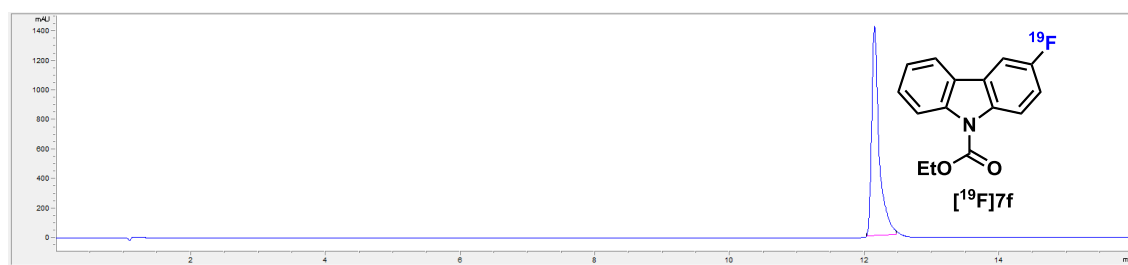

**Figure S24.** UV-HPLC trace of [ $^{19}\text{F}$ ]**7f** as the reference.

### [ $^{18}\text{F}$ ]Phenothiazin **7g**

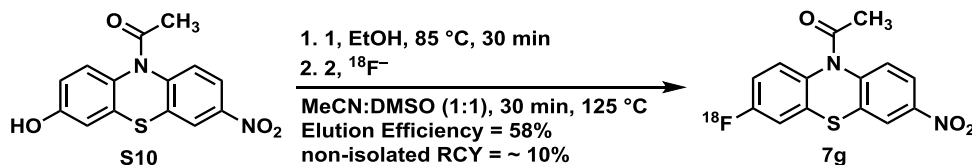

Phenol **S10** (2.6 mg, 8.7  $\mu\text{mol}$ , 1.0 eq.) and [CpRu(cod)Cl] (**1**) (8.0 mg, 26  $\mu\text{mol}$ , 3.0 eq.) were added to EtOH (50  $\mu\text{L}$ ,  $c = 0.80 \text{ M}$ ) in a 0.5 dram (1.8 mL) borosilicate glass vial. The vial was capped, and the reaction mixture was stirred at 85  $^\circ\text{C}$  (heating block temperature) for 30 min. The vial was removed from the heating block and allowed to stand for 3 min at 23  $^\circ\text{C}$ . To the vial, imidazolium chloride **2** (14 mg, 26  $\mu\text{mol}$ , 3.0 eq.) and 150  $\mu\text{L}$  of MeCN were added, and the resulting solution was drawn into a 1.0 mL polypropylene syringe.

Target water from the cyclotron containing  $^{18}\text{F}$ -fluoride was loaded with a syringe onto a QMA anion exchange cartridge (Chromafix 30-PS- $\text{HCO}_3$ ) and the radioactivity of the trapped  $^{18}\text{F}$ -fluoride was measured (6.9 mCi, 0.26 GBq). The cartridge was washed with MeCN (1.0 mL). The cartridge was inverted and fitted with a female x female Luer adapter. With the syringe, which contained the corresponding solution of **S10**-ruthenium complex and **2**, the  $^{18}\text{F}$ -fluoride was eluted into a 1 dram (3.7 mL) borosilicate vial. The cartridge was washed with DMSO (150  $\mu\text{L}$ ), followed by DMSO:MeCN (50  $\mu\text{L}$ , 1:1 (v/v)) and the radioactivity of the eluted solution was measured (4.0 mCi, 0.15 GBq). The reaction vial, which contained 400  $\mu\text{L}$  of the reaction mixture was sealed with a teflon-lined cap and was heated at 125  $^\circ\text{C}$  for 30 min. The vial, which contained

the reaction mixture was removed from the heat and was allowed to stand for 3 min at 23 °C. The reaction mixture was analyzed by radio-HPLC and radio-TLC. The product **7g** was characterized by comparing the radio-HPLC trace of the reaction mixture with the HPLC UV traces of the authentic reference sample.

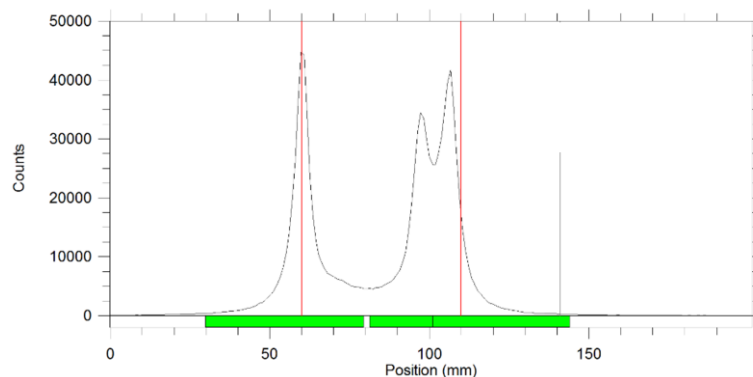

**Figure S25.** Radio-TLC trace of the [ $^{18}\text{F}$ ]deoxyfluorination reaction of **S10** yielding **7g**.

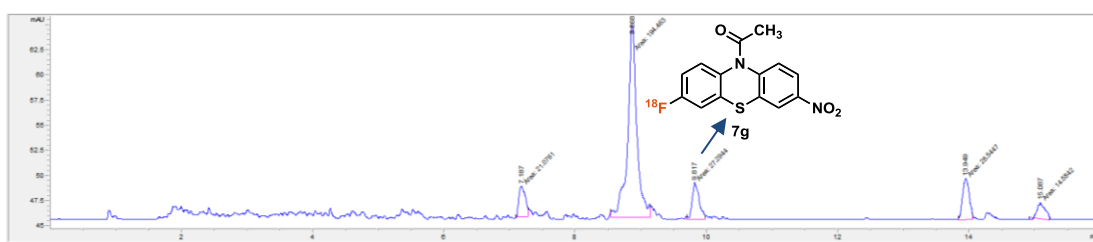

**Figure S26.** Radio-HPLC trace of the [ $^{18}\text{F}$ ]deoxyfluorination reaction of **S10** yielding **7g**.

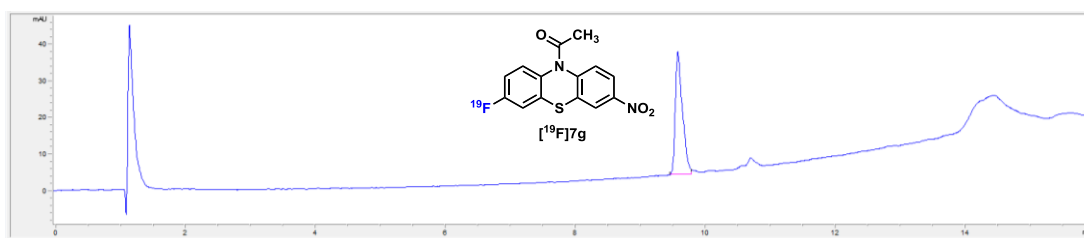

**Figure S27.** UV-HPLC trace of [ $^{19}\text{F}$ ]7g as the reference.

### [ $^{18}\text{F}$ ]Fluorodeoxyzetimibe (**7h**)

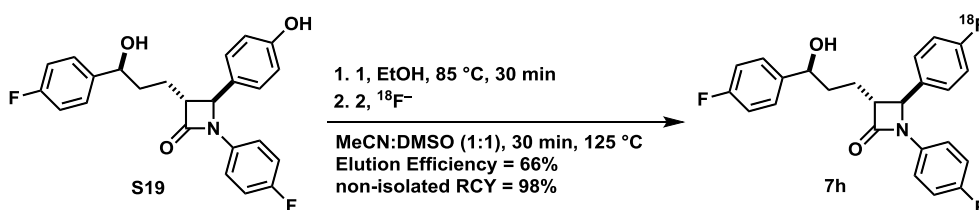

Ezetimibe (**S19**) (3.5 mg, 8.7  $\mu\text{mol}$ , 1.0 eq.) and  $[\text{CpRu}(\text{cod})\text{Cl}]$  (**1**) (8.0 mg, 26  $\mu\text{mol}$ , 3.0 eq.) were added to EtOH (50  $\mu\text{L}$ ,  $c = 0.80 \text{ M}$ ) in a 0.5 dram (1.8 mL) borosilicate glass vial. The vial was capped, and the reaction mixture was stirred at 85  $^{\circ}\text{C}$  (heating block temperature) for 30 min. The vial was removed from the heating block and allowed to stand for 3 min at 23  $^{\circ}\text{C}$ . To the vial, imidazolium chloride **2** (14 mg, 26  $\mu\text{mol}$ , 3.0 eq.) and 150  $\mu\text{L}$  of MeCN were added, and the resulting solution was drawn into a 1.0 mL polypropylene syringe.

Target water from the cyclotron containing  $^{18}\text{F}$ -fluoride was loaded with a syringe onto a QMA anion exchange cartridge (Chromafix 30-PS- $\text{HCO}_3$ ) and the radioactivity of the trapped  $^{18}\text{F}$ -fluoride was measured (5.9 mCi, 0.22 GBq). The cartridge was washed with MeCN (1.0 mL). The cartridge was inverted and fitted with a female x female Luer adapter. With the syringe, which contained the corresponding solution of **S19**-ruthenium complex and **2**, the  $^{18}\text{F}$ -fluoride was eluted into a 1 dram (3.7 mL) borosilicate vial. The cartridge was washed with DMSO (150  $\mu\text{L}$ ), followed by DMSO:MeCN (50  $\mu\text{L}$ , 1:1 (v/v)) and the radioactivity of the eluted solution was measured (3.9 mCi, 0.14 GBq). The reaction vial, which contained 400  $\mu\text{L}$  of the reaction mixture was sealed with a teflon-lined cap and was heated at 125  $^{\circ}\text{C}$  for 30 min. The vial, which contained the reaction mixture was removed from the heat and was allowed to stand for 3 min at 23  $^{\circ}\text{C}$ . The reaction mixture was analyzed by radio-HPLC and radio-TLC. The product **7h** was characterized by comparing the radio-HPLC trace of the reaction mixture with the HPLC UV traces of the authentic reference sample.

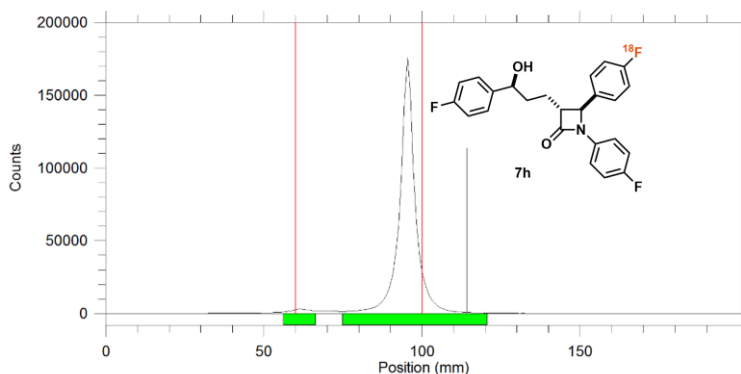

**Figure S28.** Radio-TLC trace of the  $^{18}\text{F}$ deoxyfluorination reaction of **S19** yielding **7h**.

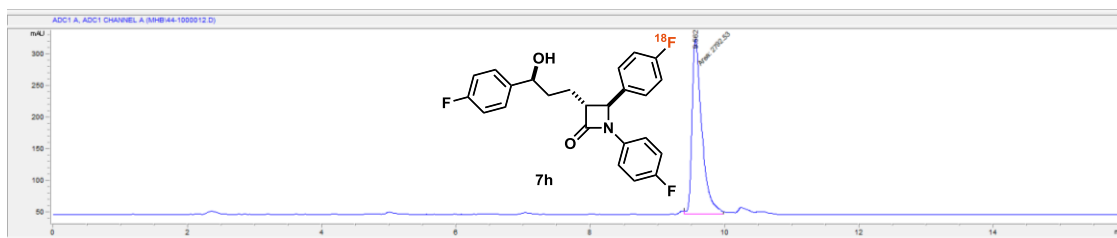

**Figure S29.** Radio-HPLC trace of the  $^{18}\text{F}$ deoxyfluorination reaction of **S19** yielding **7h**.

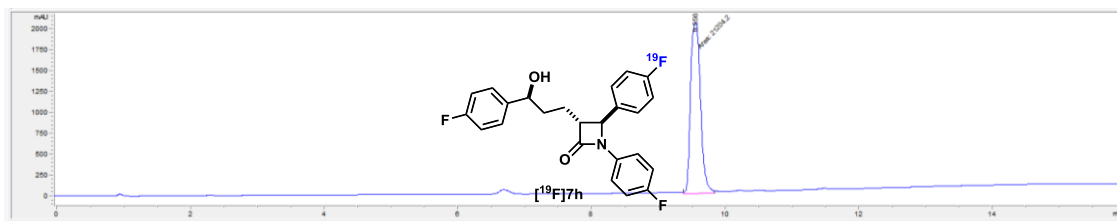

**Figure S30.** UV-HPLC trace of [ $^{19}\text{F}$ ]7h as the reference.

**[ $^{18}\text{F}$ ](4-(3-(Fluoro)phenyl)morpholine) (7i)**

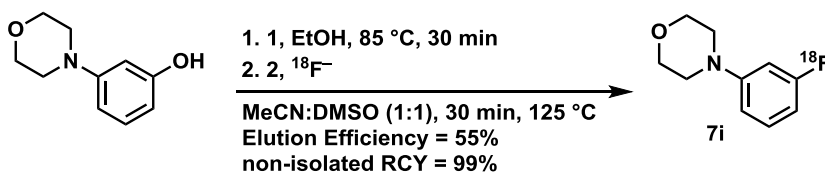

3-Morpholinophenol (1.5 mg, 8.7  $\mu\text{mol}$ , 1.0 eq.) and [CpRu(cod)Cl] (**1**) (8.0 mg, 26  $\mu\text{mol}$ , 3.0 eq.) were added to EtOH (50  $\mu\text{L}$ ,  $c = 0.80 \text{ M}$ ) in a 0.5 dram (1.8 mL) borosilicate glass vial. The vial was capped, and the reaction mixture was stirred at 85 °C (heating block temperature) for 30 min. The vial was removed from the heating block and allowed to stand for 3 min at 23 °C. To the vial, imidazolium chloride **2** (14 mg, 26  $\mu\text{mol}$ , 3.0 eq.) and 150  $\mu\text{L}$  of MeCN were added, and the resulting solution was drawn into a 1.0 mL polypropylene syringe.

Target water from the cyclotron containing  $^{18}\text{F}$ -fluoride was loaded with a syringe onto a QMA anion exchange cartridge (Chromafix 30-PS- $\text{HCO}_3$ ) and the radioactivity of the trapped  $^{18}\text{F}$ -fluoride was measured (5.6 mCi, 0.21 GBq). The cartridge was washed with MeCN (1.0 mL). The cartridge was inverted and fitted with a female x female Luer adapter. With the syringe, which contained the corresponding solution of 3-morpholinophenol-ruthenium complex and **2**, the  $^{18}\text{F}$ -fluoride was eluted into a 1 dram (3.7 mL) borosilicate vial. The cartridge was washed with DMSO (150  $\mu\text{L}$ ), followed by DMSO:MeCN (50  $\mu\text{L}$ , 1:1 (v/v)) and the radioactivity of the eluted solution was measured (3.1 mCi, 0.12 GBq). The reaction vial, which contained 400  $\mu\text{L}$  of the reaction mixture was sealed with a teflon-lined cap and was heated at 125 °C for 30 min. The vial, which contained the reaction mixture was removed from the heat and was allowed to stand for 3 min at 23 °C. The reaction mixture was analyzed by radio-HPLC and radio-TLC. The product **7i** was characterized by comparing the radio-HPLC trace of the reaction mixture with the HPLC UV traces of the authentic reference sample.

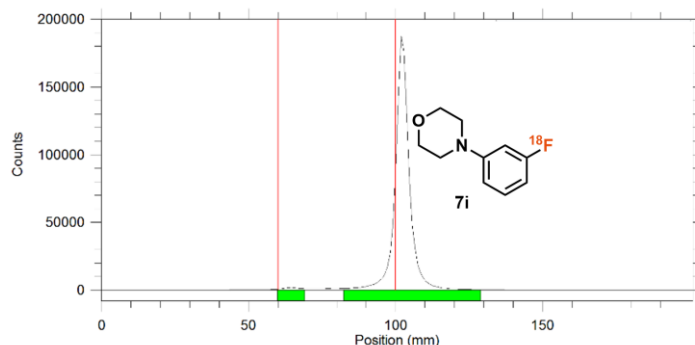

**Figure S31.** Radio-TLC trace of the [ $^{18}\text{F}$ ]deoxyfluorination reaction of 3-morpholinophenol yielding **7i**.

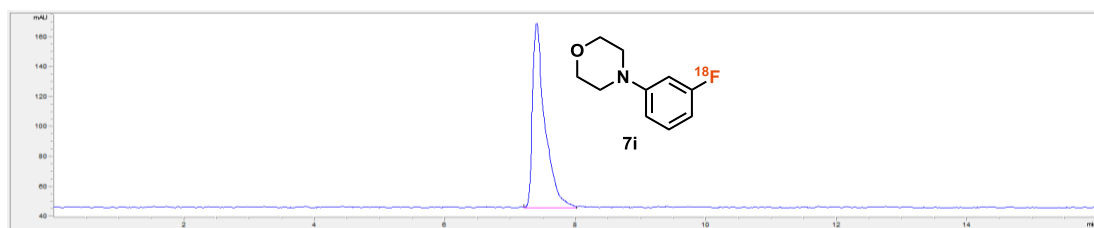

**Figure S32.** Radio-HPLC trace of the [ $^{18}\text{F}$ ]deoxyfluorination reaction of 3-morpholinophenol yielding **7i**.

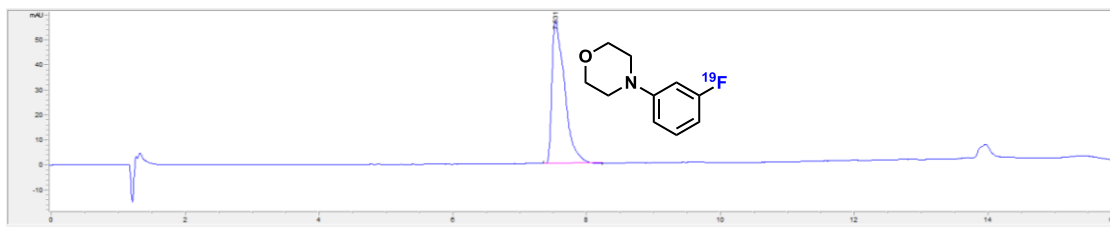

**Figure S33.** UV-HPLC trace of 4-(3-fluorophenyl)morpholine as the reference.

### [ $^{18}\text{F}$ ]4-Fluorobenzamide (**7j**)

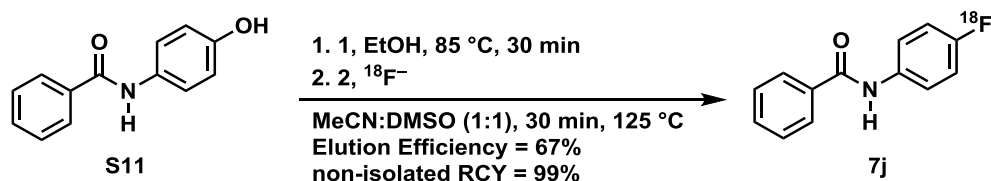

*N*-(4-Hydroxyphenyl)benzamide (**S11**) (1.8 mg, 8.7  $\mu\text{mol}$ , 1.0 eq.) and [CpRu(cod)Cl] (**1**) (8.0 mg, 26  $\mu\text{mol}$ , 3.0 eq.) were added to EtOH (50  $\mu\text{L}$ ,  $c = 0.80 \text{ M}$ ) in a 0.5 dram (1.8 mL) borosilicate glass vial. The vial was capped, and the reaction mixture was stirred at 85 °C (heating block temperature) for 30 min. The vial was removed from the heating block and allowed to stand for 3 min at 23 °C. To the vial, imidazolium chloride **2**



(14 mg, 26  $\mu\text{mol}$ , 3.0 eq.) and 150  $\mu\text{L}$  of MeCN were added, and the resulting solution was drawn into a 1.0 mL polypropylene syringe.

Target water from the cyclotron containing  $^{18}\text{F}$ -fluoride was loaded with a syringe onto a QMA anion exchange cartridge (Chromafix 30-PS- $\text{HCO}_3$ ) and the radioactivity of the trapped  $^{18}\text{F}$ -fluoride was measured (7.2 mCi, 0.27 GBq). The cartridge was washed with MeCN (1.0 mL). The cartridge was inverted and fitted with a female  $\times$  female Luer adapter. With the syringe, which contained the corresponding solution of **S11**-ruthenium complex and **2**, the  $^{18}\text{F}$ -fluoride was eluted into a 1 dram (3.7 mL) borosilicate vial. The cartridge was washed with DMSO (150  $\mu\text{L}$ ), followed by DMSO:MeCN (50  $\mu\text{L}$ , 1:1 (v/v)) and the radioactivity of the eluted solution was measured (4.8 mCi, 0.18 GBq). The reaction vial, which contained 400  $\mu\text{L}$  of the reaction mixture was sealed with a teflon-lined cap and was heated at 125  $^\circ\text{C}$  for 30 min. The vial, which contained the reaction mixture was removed from the heat and was allowed to stand for 3 min at 23  $^\circ\text{C}$ . The reaction mixture was analyzed by radio-HPLC and radio-TLC. The product **7j** was characterized by comparing the radio-HPLC trace of the reaction mixture with the HPLC UV traces of the authentic reference sample.

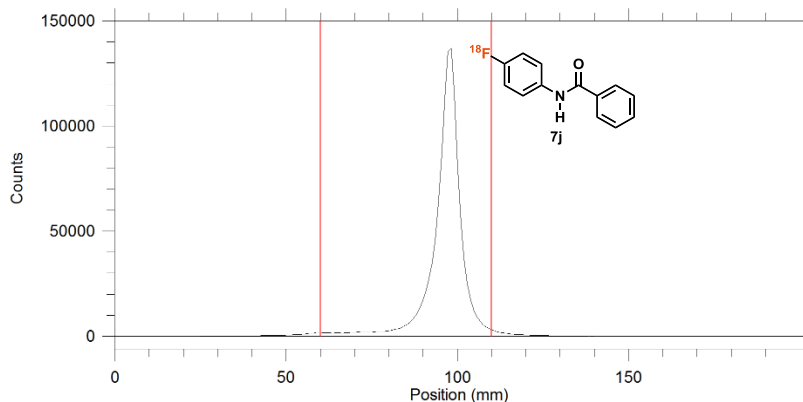

**Figure S34.** Radio-TLC trace of the [ $^{18}\text{F}$ ]deoxyfluorination reaction of **S11** yielding **7j**.

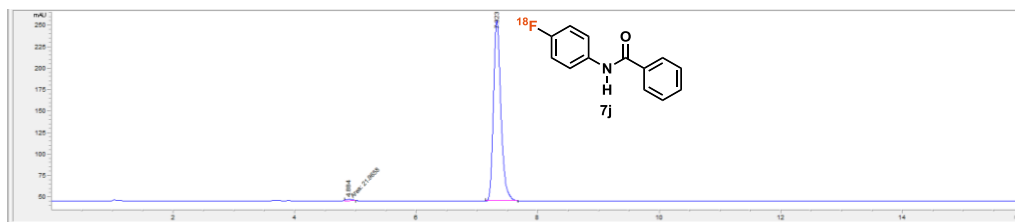

**Figure S35.** Radio-HPLC trace of the [ $^{18}\text{F}$ ]deoxyfluorination reaction of **S11** yielding **7j**.

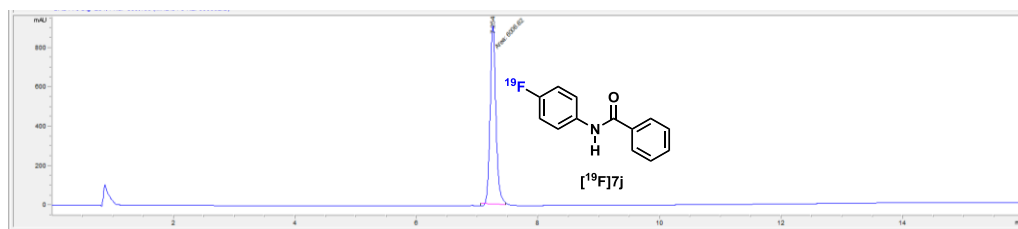

**Figure S36.** UV-HPLC trace of [ $^{19}\text{F}$ ]7j as the reference.

### [ $^{18}\text{F}$ ]4-(Fluoro)-2-phenylquinoline (7k)

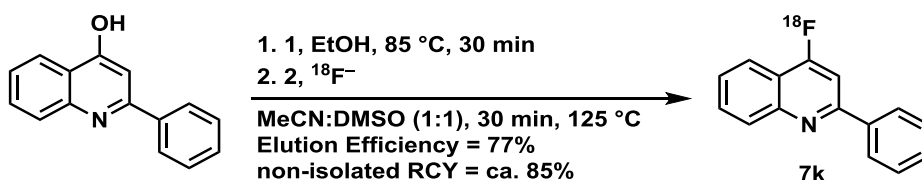

2-Phenylquinolin-4-ol (1.9 mg, 8.7  $\mu\text{mol}$ , 1.0 eq.) and [CpRu(cod)Cl] (**1**) (8.0 mg, 26  $\mu\text{mol}$ , 3.0 eq.) were added to EtOH (50  $\mu\text{L}$ ,  $c = 0.80\text{ M}$ ) in a 0.5 dram (1.8 mL) borosilicate glass vial. The vial was capped, and the reaction mixture was stirred at 85 °C (heating block temperature) for 30 min. The vial was removed from the heating block and allowed to stand for 3 min at 23 °C. To the vial, imidazolium chloride **2** (14 mg, 26  $\mu\text{mol}$ , 3.0 eq.) and 150  $\mu\text{L}$  of MeCN were added, and the resulting solution was drawn into a 1.0 mL polypropylene syringe.

Target water from the cyclotron containing  $^{18}\text{F}$ -fluoride was loaded with a syringe onto a QMA anion exchange cartridge (Chromafix 30-PS- $\text{HCO}_3$ ) and the radioactivity of the trapped  $^{18}\text{F}$ -fluoride was measured (6.0 mCi, 0.22 GBq). The cartridge was washed with MeCN (1.0 mL). The cartridge was inverted and fitted with a female x female Luer adapter. With the syringe, which contained the corresponding solution of 2-phenylquinolin-4-ol-ruthenium complex and **2**, the  $^{18}\text{F}$ -fluoride was eluted into a 1 dram (3.7 mL) borosilicate vial. The cartridge was washed with DMSO (150  $\mu\text{L}$ ), followed by DMSO:MeCN (50  $\mu\text{L}$ , 1:1 (v/v)) and the radioactivity of the eluted solution was measured (4.6 mCi, 0.170 Bq). The reaction vial, which contained 400  $\mu\text{L}$  of the reaction mixture was sealed with a teflon-lined cap and was heated at 125 °C for 30 min. The vial, which contained the reaction mixture was removed from the heat and was allowed to stand for 3 min at 23 °C. The reaction mixture was analyzed by radio-HPLC and radio-TLC. The product **7k** was characterized by comparing the radio-HPLC trace of the reaction mixture with the HPLC UV traces of the authentic reference sample.

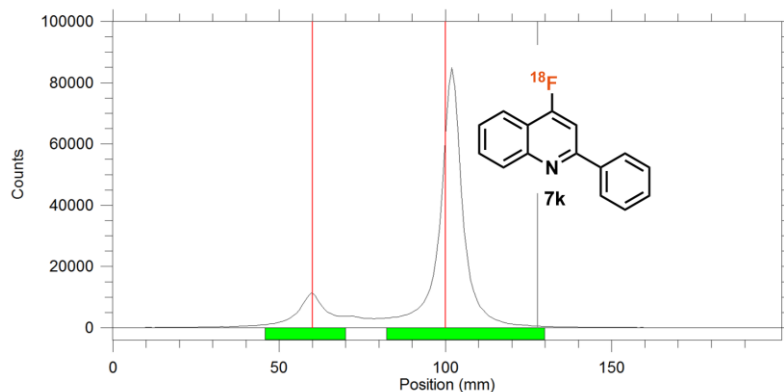

**Figure S37.** Radio-TLC trace of the [ $^{18}\text{F}$ ]deoxyfluorination reaction of 2-phenylquinolin-4-ol yielding **7k**.

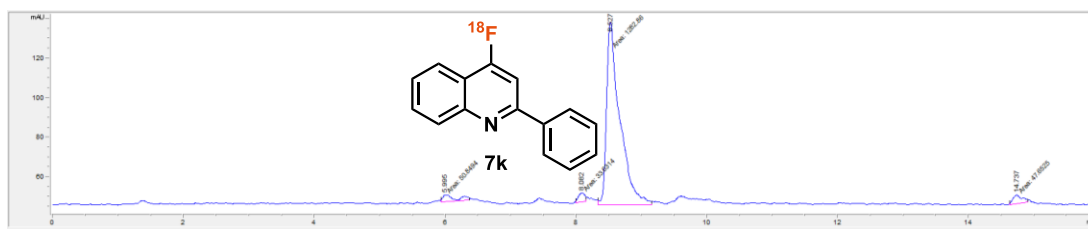

**Figure S38.** Radio-HPLC trace of the [ $^{18}\text{F}$ ]deoxyfluorination reaction of 2-phenylquinolin-4-ol yielding **7k**.

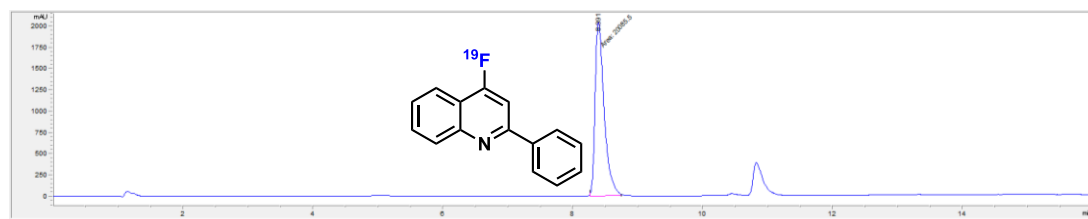

**Figure S39.** UV-HPLC trace of 4-fluoro-2-phenylquinoline as the reference.

### [ $^{18}\text{F}$ ]Purin **7l**

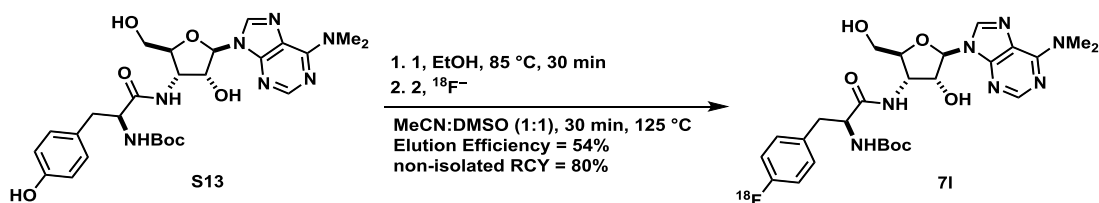

Purin **S13** (3.9 mg, 8.7  $\mu\text{mol}$ , 1.0 eq.) and [CpRu(cod)Cl] (**1**) (8.0 mg, 26  $\mu\text{mol}$ , 3.0 eq.) were added to EtOH (50  $\mu\text{L}$ ,  $c = 0.80\text{ M}$ ) in a 0.5 dram (1.8 mL) borosilicate glass vial. The vial was capped, and the reaction mixture was stirred at 85 °C (heating block temperature) for 30 min. The vial was removed from the heating

block and allowed to stand for 3 min at 23 °C. To the vial, imidazolium chloride **2** (14 mg, 26 μmol, 3.0 eq.) and 150 μL of MeCN were added, and the resulting solution was drawn into a 1.0 mL polypropylene syringe.

Target water from the cyclotron containing  $^{18}\text{F}$ -fluoride was loaded with a syringe onto a QMA anion exchange cartridge (Chromafix 30-PS- $\text{HCO}_3$ ) and the radioactivity of the trapped  $^{18}\text{F}$ -fluoride was measured (6.5 mCi, 0.24 GBq). The cartridge was washed with MeCN (1.0 mL). The cartridge was inverted and fitted with a female x female Luer adapter. With the syringe, which contained the corresponding solution of **S13**-ruthenium complex and **2**, the  $^{18}\text{F}$ -fluoride was eluted into a 1 dram (3.7 mL) borosilicate vial. The cartridge was washed with DMSO (150 μL), followed by DMSO:MeCN (50 μL, 1:1 (v/v)) and the radioactivity of the eluted solution was measured (3.5 mCi, 0.13 GBq). The reaction vial, which contained 400 μL of the reaction mixture was sealed with a teflon-lined cap and was heated at 125 °C for 30 min. The vial, which contained the reaction mixture was removed from the heat and was allowed to stand for 3 min at 23 °C. The reaction mixture was analyzed by radio-HPLC and radio-TLC. The product **71** was characterized by comparing the radio-HPLC trace of the reaction mixture with the HPLC UV traces of the authentic reference sample.

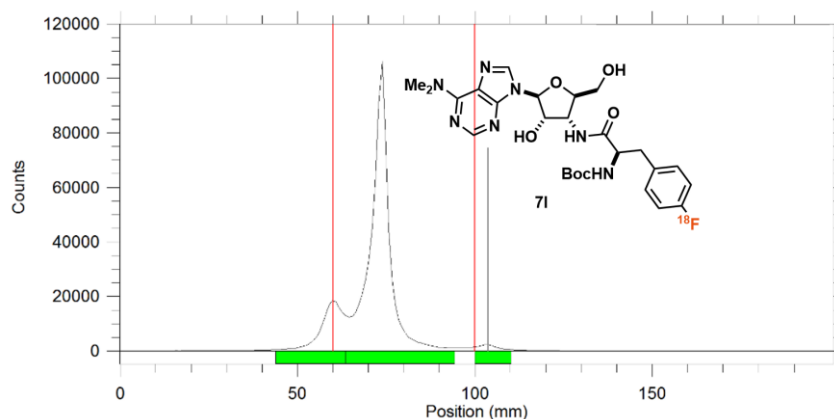

**Figure S40.** Radio-TLC trace of the [ $^{18}\text{F}$ ]deoxyfluorination reaction of **S13** yielding **71**.

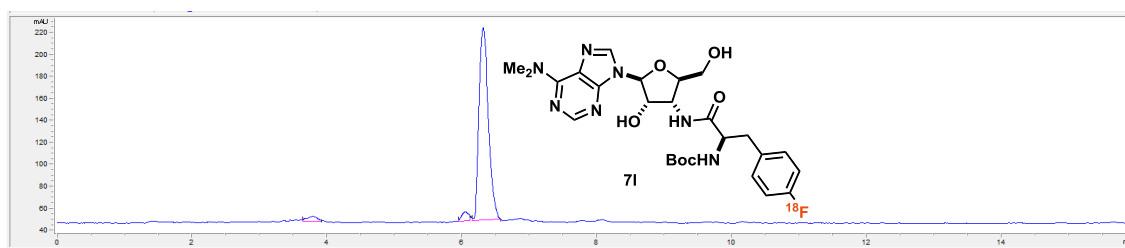

**Figure S41.** Radio-HPLC trace of the [ $^{18}\text{F}$ ]deoxyfluorination reaction of **S13** yielding **71**.

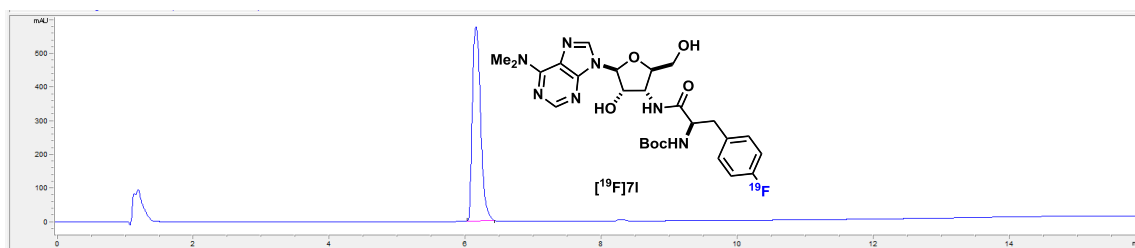

**Figure S42.** UV-HPLC trace of [ $^{19}\text{F}$ ]7I as the reference.

### [ $^{18}\text{F}$ ]5-Bromo-2-(fluoro)pyrimidine (7m)

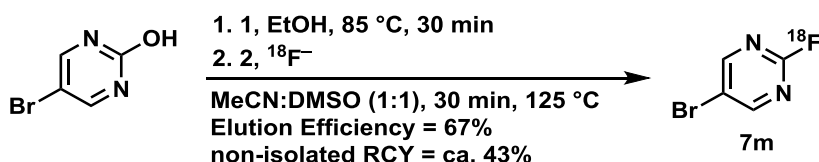

5-Bromopyrimidin-2-ol (1.5 mg, 8.7  $\mu\text{mol}$ , 1.0 eq.) and [CpRu(cod)Cl] (**1**) (8.0 mg, 26  $\mu\text{mol}$ , 3.0 eq.) were added to EtOH (50  $\mu\text{L}$ ,  $c = 0.80\text{ M}$ ) in a 0.5 dram (1.8 mL) borosilicate glass vial. The vial was capped, and the reaction mixture was stirred at 85 °C (heating block temperature) for 30 min. The vial was removed from the heating block and allowed to stand for 3 min at 23 °C. To the vial, imidazolium chloride **2** (14 mg, 26  $\mu\text{mol}$ , 3.0 eq.) and 150  $\mu\text{L}$  of MeCN were added, and the resulting solution was drawn into a 1.0 mL polypropylene syringe.

Target water from the cyclotron containing  $^{18}\text{F}$ -fluoride was loaded with a syringe onto a QMA anion exchange cartridge (Chromafix 30-PS- $\text{HCO}_3$ ) and the radioactivity of the trapped  $^{18}\text{F}$ -fluoride was measured (5.1 mCi, 0.19 GBq). The cartridge was washed with MeCN (1.0 mL). The cartridge was inverted and fitted with a female x female Luer adapter. With the syringe, which contained the corresponding solution of 5-bromopyrimidin-2-ol-ruthenium complex and **2**, the  $^{18}\text{F}$ -fluoride was eluted into a 1 dram (3.7 mL) borosilicate vial. The cartridge was washed with DMSO (150  $\mu\text{L}$ ), followed by DMSO:MeCN (50  $\mu\text{L}$ , 1:1 (v/v)) and the radioactivity of the eluted solution was measured (3.5 mCi, 0.13 GBq). The reaction vial, which contained 400  $\mu\text{L}$  of the reaction mixture was sealed with a teflon-lined cap and was heated at 125 °C for 30 min. The vial, which contained the reaction mixture was removed from the heat and was allowed to stand for 3 min at 23 °C. The reaction mixture was analyzed by radio-HPLC and radio-TLC. The product **7m** was characterized by comparing the radio-HPLC trace of the reaction mixture with the HPLC UV traces of the authentic reference sample.

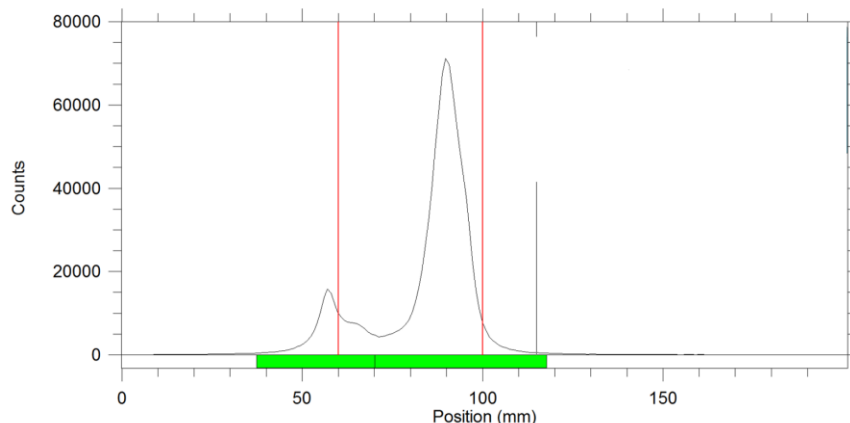

**Figure S43.** Radio-TLC trace of the [ $^{18}\text{F}$ ]deoxyfluorination reaction of 5-bromopyrimidin-2-ol yielding **7m**.

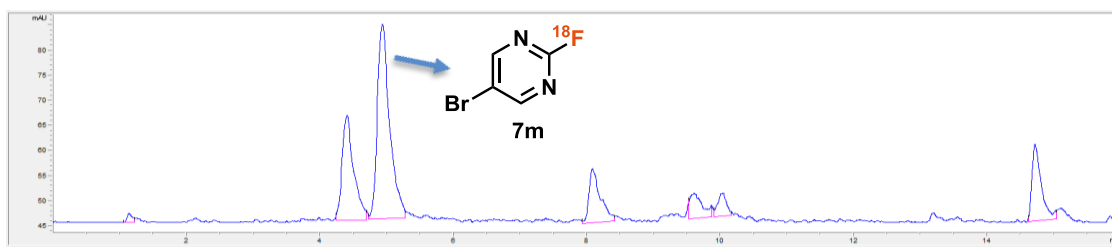

**Figure S44.** Radio-HPLC trace of the [ $^{18}\text{F}$ ]deoxyfluorination reaction of 5-bromopyrimidin-2-ol yielding **7m**.

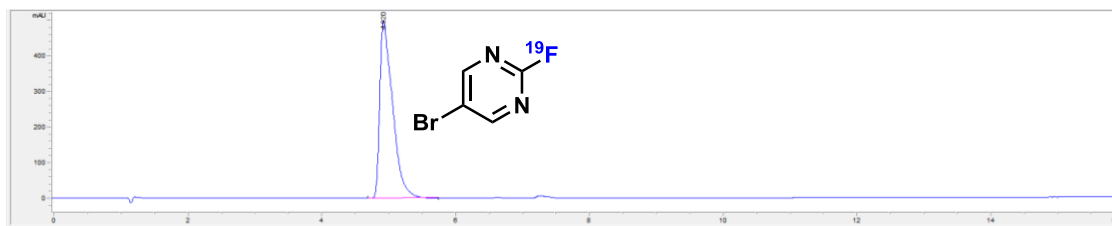

**Figure S45.** UV-HPLC trace of 5-bromo-2-fluoropyrimidine as the reference.

### [ $^{18}\text{F}$ ]L-tyrosinate **7n**

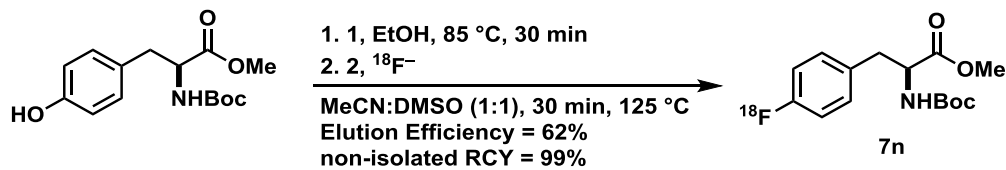

Methyl (*tert*-butoxycarbonyl)-L-tyrosinate (2.5 mg, 8.7  $\mu\text{mol}$ , 1.0 eq.) and [CpRu(cod)Cl] (**1**) (8.0 mg, 26  $\mu\text{mol}$ , 3.0 eq.) were added to EtOH (50  $\mu\text{L}$ ,  $c = 0.80\text{ M}$ ) in a 0.5 dram (1.8 mL) borosilicate glass vial. The vial was capped, and the reaction mixture was stirred at 85 °C (heating block temperature) for 30 min. The vial was

removed from the heating block and allowed to stand for 3 min at 23 °C. To the vial, imidazolium chloride **2** (14 mg, 26  $\mu$ mol, 3.0 eq.) and 150  $\mu$ L of MeCN were added, and the resulting solution was drawn into a 1.0 mL polypropylene syringe.

Target water from the cyclotron containing  $^{18}\text{F}$ -fluoride was loaded with a syringe onto a QMA anion exchange cartridge (Chromafix 30-PS- $\text{HCO}_3$ ) and the radioactivity of the trapped  $^{18}\text{F}$ -fluoride was measured (7.3 mCi, 0.27 GBq). The cartridge was washed with MeCN (1.0 mL). The cartridge was inverted and fitted with a female x female Luer adapter. With the syringe, which contained the corresponding solution of methyl (*tert*-butoxycarbonyl)-*L*-tyrosinate-ruthenium complex and **2**, the  $^{18}\text{F}$ -fluoride was eluted into a 1 dram (3.7 mL) borosilicate vial. The cartridge was washed with DMSO (150  $\mu$ L), followed by DMSO:MeCN (50  $\mu$ L, 1:1 (v/v)) and the radioactivity of the eluted solution was measured (4.6 mCi, 0.17 GBq). The reaction vial, which contained 400  $\mu$ L of the reaction mixture was sealed with a teflon-lined cap and was heated at 125 °C for 30 min. The vial, which contained the reaction mixture was removed from the heat and was allowed to stand for 3 min at 23 °C. The reaction mixture was analyzed by radio-HPLC and radio-TLC. The product **7n** was characterized by comparing the radio-HPLC trace of the reaction mixture with the HPLC UV traces of the authentic reference sample.

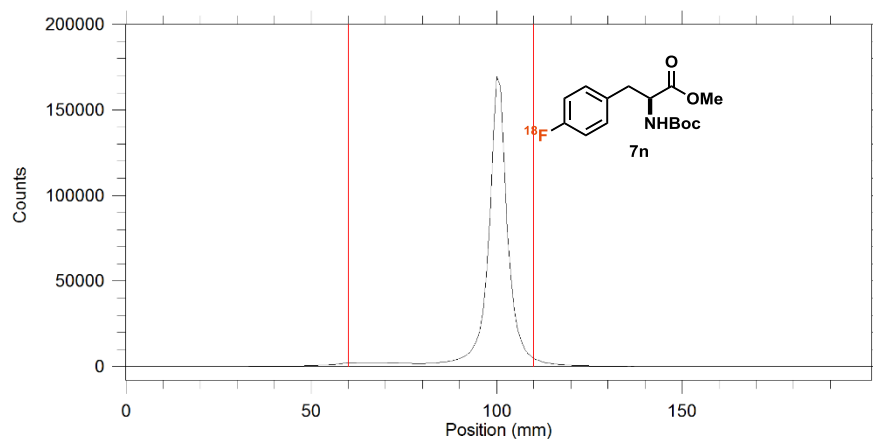

**Figure S46.** Radio-TLC trace of the [ $^{18}\text{F}$ ]deoxyfluorination reaction of methyl (*tert*-butoxycarbonyl)-*L*-tyrosinate yielding **7n**.

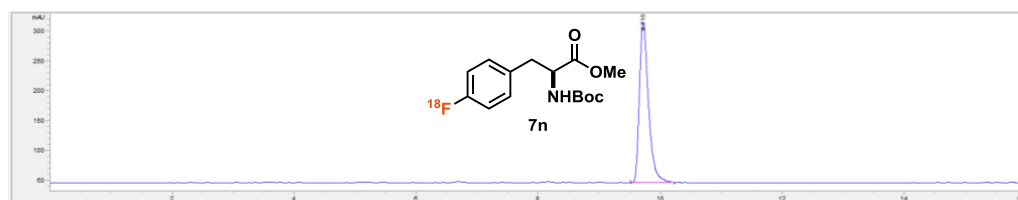

**Figure S47.** Radio-HPLC trace of the [ $^{18}\text{F}$ ]deoxyfluorination reaction of methyl (*tert*-butoxycarbonyl)-*L*-tyrosinate yielding **7n**.

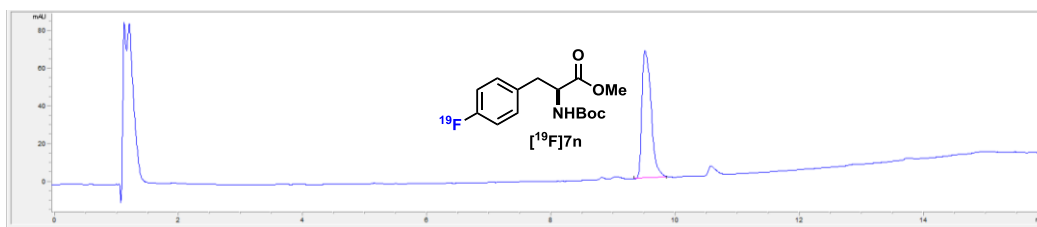

**Figure S48.** UV-HPLC trace of [ $^{19}\text{F}$ ]7n as the reference.

### [ $^{18}\text{F}$ ]Ethyl 4-(fluoro)-1*H*-indole-1-carboxylate (**7o**)

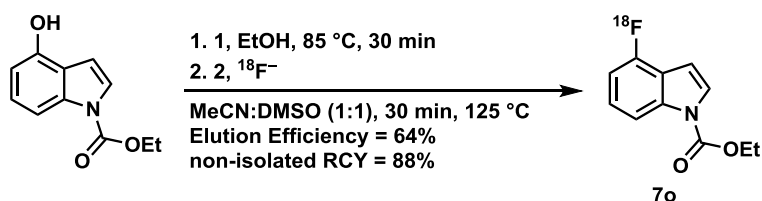

Ethyl 4-hydroxy-1*H*-indole-1-carboxylate (1.7 mg, 8.7  $\mu\text{mol}$ , 1.0 eq.) and [CpRu(cod)Cl] (**1**) (8.0 mg, 26  $\mu\text{mol}$ , 3.0 eq.) were added to EtOH (50  $\mu\text{L}$ ,  $c = 0.80\text{ M}$ ) in a 0.5 dram (1.8 mL) borosilicate glass vial. The vial was capped, and the reaction mixture was stirred at 85 °C (heating block temperature) for 30 min. The vial was removed from the heating block and allowed to stand for 3 min at 23 °C. To the vial, imidazolium chloride **2** (14 mg, 26  $\mu\text{mol}$ , 3.0 eq.) and 150  $\mu\text{L}$  of MeCN were added, and the resulting solution was drawn into a 1.0 mL polypropylene syringe.

Target water from the cyclotron containing  $^{18}\text{F}$ -fluoride was loaded with a syringe onto a QMA anion exchange cartridge (Chromafix 30-PS-HCO<sub>3</sub>) and the radioactivity of the trapped  $^{18}\text{F}$ -fluoride was measured (10.7 mCi, 0.40 GBq). The cartridge was washed with MeCN (1.0 mL). The cartridge was inverted and fitted with a female  $\times$  female Luer adapter. With the syringe, which contained the corresponding solution of ethyl 4-hydroxy-1*H*-indole-1-carboxylate-ruthenium complex and **2**, the  $^{18}\text{F}$ -fluoride was eluted into a 1 dram (3.7 mL) borosilicate vial. The cartridge was washed with DMSO (150  $\mu\text{L}$ ), followed by DMSO:MeCN (50  $\mu\text{L}$ , 1:1 (v/v)) and the radioactivity of the eluted solution was measured (6.8 mCi, 0.25 GBq). The reaction vial, which contained 400  $\mu\text{L}$  of the reaction mixture was sealed with a teflon-lined cap and was heated at 125 °C for 30 min. The vial, which contained the reaction mixture was removed from the heat and was allowed to stand for 3 min at 23 °C. The reaction mixture was analyzed by radio-HPLC and radio-TLC. The product **7o** was characterized by comparing the radio-HPLC trace of the reaction mixture with the HPLC UV traces of the authentic reference sample.



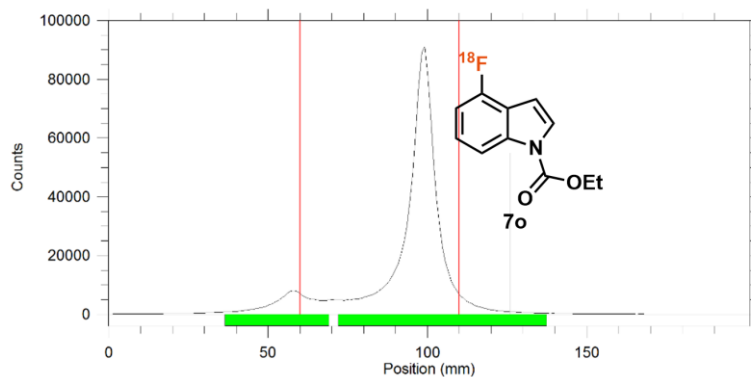

**Figure S49.** Radio-TLC trace of the [ $^{18}\text{F}$ ]deoxyfluorination reaction of ethyl 4-hydroxy-1*H*-indole-1-carboxylate yielding **7o**.

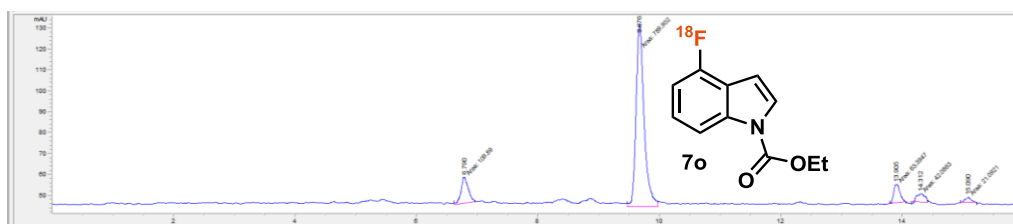

**Figure S50.** Radio-HPLC trace of the [ $^{18}\text{F}$ ]deoxyfluorination reaction of ethyl 4-hydroxy-1*H*-indole-1-carboxylate yielding **7o**.

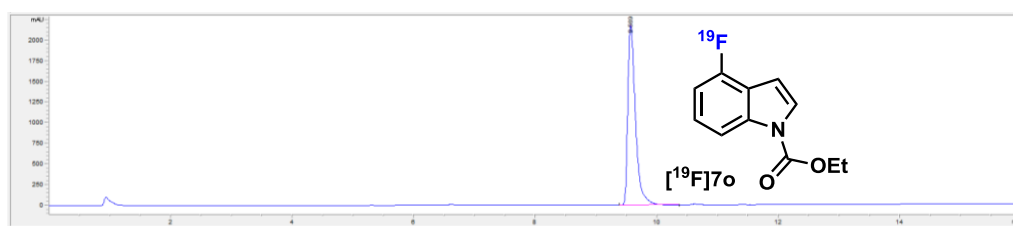

**Figure S51.** UV-HPLC trace of [ $^{19}\text{F}$ ]**7o** as the reference.

### [ $^{18}\text{F}$ ]Chromane **7p**

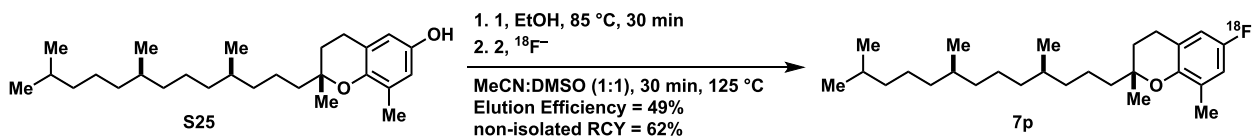

(+)- $\delta$ -Tocopherol (**S25**) (3.4 mg, 8.7  $\mu\text{mol}$ , 1.0 eq.) and [CpRu(cod)Cl] (**1**) (8.0 mg, 26  $\mu\text{mol}$ , 3.0 eq.) were added to EtOH (50  $\mu\text{L}$ ,  $c = 0.80\text{ M}$ ) in a 0.5 dram (1.8 mL) borosilicate glass vial. The vial was capped, and the reaction mixture was stirred at 85 °C (heating block temperature) for 30 min. The vial was removed from

the heating block and allowed to stand for 3 min at 23 °C. To the vial, imidazolium chloride **2** (14 mg, 26 μmol, 3.0 eq.) and 150 μL of MeCN were added, and the resulting solution was drawn into a 1.0 mL polypropylene syringe.

Target water from the cyclotron containing  $^{18}\text{F}$ -fluoride was loaded with a syringe onto a QMA anion exchange cartridge (Chromafix 30-PS- $\text{HCO}_3$ ) and the radioactivity of the trapped  $^{18}\text{F}$ -fluoride was measured (6.0 mCi, 0.22 GBq). The cartridge was washed with MeCN (1.0 mL). The cartridge was inverted and fitted with a female x female Luer adapter. With the syringe, which contained the corresponding solution of **S25**-ruthenium complex and **2**, the  $^{18}\text{F}$ -fluoride was eluted into a 1 dram (3.7 mL) borosilicate vial. The cartridge was washed with DMSO (150 μL), followed by DMSO:MeCN (50 μL, 1:1 (v/v)) and the radioactivity of the eluted solution was measured (3.0 mCi, 0.11 GBq). The reaction vial, which contained 400 μL of the reaction mixture was sealed with a teflon-lined cap and was heated at 125 °C for 30 min. The vial, which contained the reaction mixture was removed from the heat and was allowed to stand for 3 min at 23 °C. The reaction mixture was analyzed by radio-HPLC and radio-TLC. The product **7p** was characterized by comparing the radio-HPLC trace of the reaction mixture with the HPLC UV traces of the authentic reference sample.

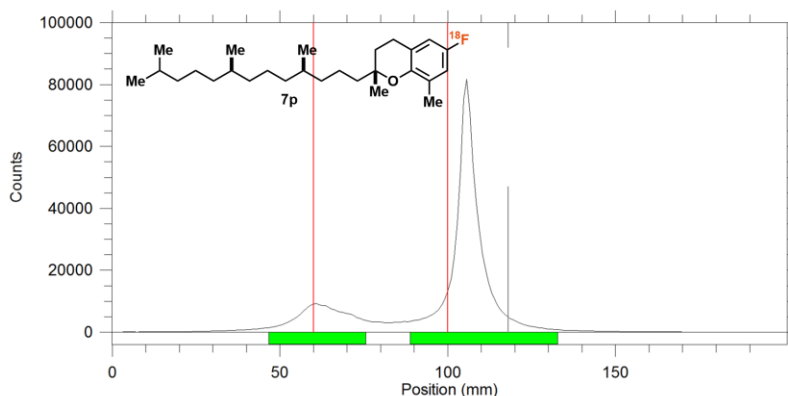

**Figure S52.** Radio-TLC trace of the [ $^{18}\text{F}$ ]deoxyfluorination reaction of **S25** yielding **7p**.

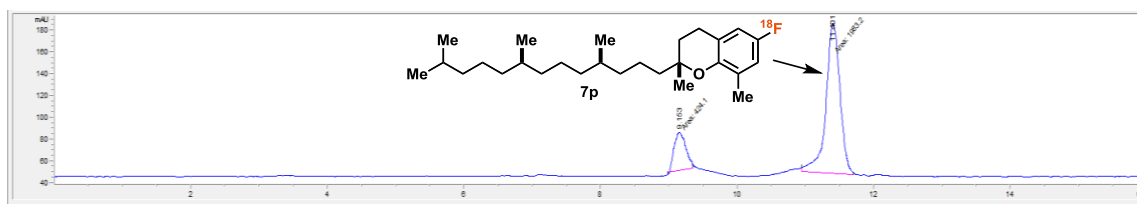

**Figure S53.** Radio-HPLC trace of the [ $^{18}\text{F}$ ]deoxyfluorination reaction of **S25** yielding **7p**. (Pentafluorophenyl (PFP) HPLC column was used).

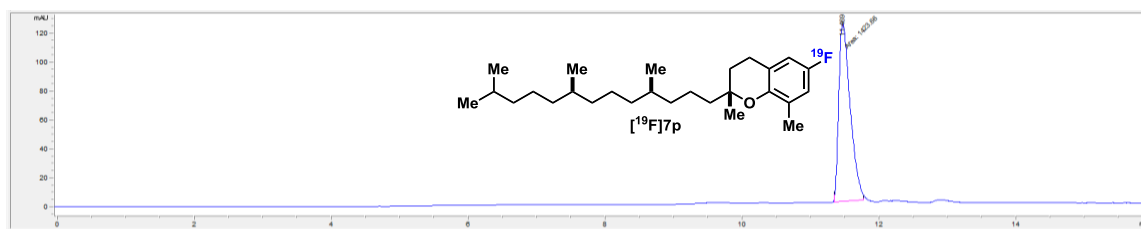

**Figure S54.** UV-HPLC trace of [ $^{19}\text{F}$ ]7p as the reference. (Pentafluorophenyl (PFP) HPLC column was used).

### Automated radiosynthesis

For reactions performed on the Elixys, an adapter was needed to accommodate Wheaton 3 mL v-vials. A cylinder of solid aluminum (diameter 0.60 in, height 0.52 inches) was manufactured for that purpose.

### Automated radiosynthesis of 9

**Influence of vial size and type:** In ethanol (200  $\mu\text{L}$ ), methyl acetyl-*L*-tyrosinate (**8**) (5.0 mg, 21  $\mu\text{mol}$ , 1.0 eq), [CpRu(cod)Cl] complex **1** (10 mg, 27  $\mu\text{mol}$ , 1.3 eq) and *N,N*-bis(2,6-diisopropylphenyl)-2-chloroimidazolium chloride (**2**) (15 mg, 33  $\mu\text{mol}$ , 1.6 eq) were mixed in a dram vial and heated at 85  $^{\circ}\text{C}$  (heating block temperature) for 30 min to constitute the *eluent*.  $^{18}\text{F}$ -Fluoride was loaded onto QMA anion exchange cartridge (Chromafix 30-PS- $\text{HCO}_3$ ), and the cartridge was washed with 1 mL of ethanol to remove water from  $^{18}\text{F}$ -fluoride. The cartridge was inverted and fitted with a female x female Luer adapter.  $^{18}\text{F}$ -Fluoride was eluted with the *eluent* into a dram vial (3 mL Wheaton v-vial, 8 mL Wheaton v-vial). Then, acetonitrile (300  $\mu\text{L}$ ) followed by DMSO (300  $\mu\text{L}$ ) were passed through the cartridge and collected into the same vial. The reaction vial was sealed with a teflon-lined cap and heated at 130  $^{\circ}\text{C}$  for 30 min. The reaction was subsequently cooled to 23  $^{\circ}\text{C}$  and the radiochemical yield was estimated by radio-TLC. The results are summarized in Figure S55.

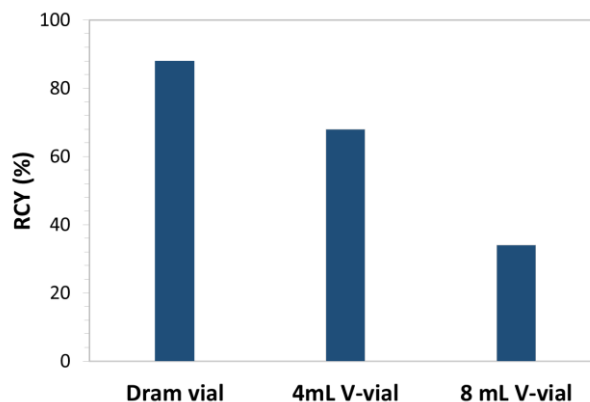

**Figure S55.** Influence of vial size and type on [ $^{18}\text{F}$ ]deoxyfluorination of **8** yielding **9**.

**Influence of pressure:** The *precursor solution* was prepared by heating methyl acetyl-*L*-tyrosinate (**8**) (5.0 mg, 21  $\mu$ mol, 1.0 eq), [CpRu(COD)Cl] (**1**) (10 mg, 27  $\mu$ mol, 1.3 eq), *N,N*-bis(2,6-diisopropylphenyl)-2-chloroimidazolium chloride (**2**) (15 mg, 33  $\mu$ mol, 1.6 eq) in ethanol (250  $\mu$ L, 200 proof) at 85 °C (heating block temperature) for 30 min and diluting with DMSO (0.4 mL) and acetonitrile (0.4 mL).

In a Siemens Explora FDG4, fluoride was captured on a QMA previously conditioned (with 1 mg K<sub>2</sub>CO<sub>3</sub> in 1 mL water and subsequently washed with 10 mL water), eluted with Kryptofix solution (2 mL water, 8 mL acetonitrile, 10 mg K<sub>2</sub>CO<sub>3</sub>, 50 mg K<sub>2.2.2</sub>) and dried azeotropically with acetonitrile (1 mL) three times. The *precursor solution* was added and heated at a defined pressure (30 kPa or 205 kPa) for 30 min. A sample was taken to estimate the radiochemical yield by HPLC. At 30 kPa 4.1% RCY and at 205 kPa 21% RCY were observed.

**Radiosynthesis:** Methyl acetyl-*L*-tyrosinate (**8**) (5.0 mg, 21  $\mu$ mol, 1.0 eq), [CpRu(COD)Cl] (**1**) (7.0 mg, 27  $\mu$ mol, 1.3 eq), 30 mg *N,N*-bis(2,6-diisopropylphenyl)-2-chloroimidazolium chloride (**2**) (65  $\mu$ mol, 3.1 eq) were heated in 250  $\mu$ L ethanol (200 proof) at 85 °C (heating block temperature) for 30 min to constitute the *eluent*.

On an automated synthesis platform (Elixys, Sofie Biosciences), aqueous <sup>18</sup>F-fluoride was trapped on a QMA cartridge and ethanol (1 mL 200 proof) was passed through the cartridge to remove residual water. 461 mCi (17.1 GBq) of <sup>18</sup>F-fluoride were measured at t = 0. The *eluent* was used to elute fluoride off the QMA into a 3 mL Wheaton V-vial. 0.8 mL 1:1 DMSO/MeCN were used to flush the piping and collected in the V-vial as well. Remaining on Cartridge: 66.4 mCi (2.46 GBq) (t = 22 min), in reactor (after reaction): 236 mCi (8.84 GBq) (t = 45 min). Elution efficiency: 69.0%.

Elution losses not accounted for in the EE can occur during transfer from QMA to reactor and during the reaction, where HF can be absorbed into the sealant of Elixys cassettes.

The mixture was stirred at elevated temperature (set-point at 150 °C) for 30 min and subsequently cooled to 23 °C. A sample was used to estimate the radiochemical yield by analytical HPLC (69% estimated radiochemical yield, Figure S56, analytical HPLC on an Eclipse XDB-C18 column (10 × 4.6 mm, 5  $\mu$ m), by a gradient from 5% MeCN/H<sub>2</sub>O/0.1% TFA to 95% MeCN/H<sub>2</sub>O/0.1% TFA within 10 min at a flow rate of 2 mL/min. The solution was diluted to 2 mL with water and loaded onto a semipreparative HPLC and purified with a Gemini NX-C18 (250 × 10 mm, 5  $\mu$ m) column with a gradient from 5% MeCN/Water/0.1% TFA to 60% MeCN/Water/0.1% TFA within 45 min, at a flow rate of 3 mL/min (Figure S57). 111 mCi (4.11 GBq) were isolated (t = 80 min).

Isolated activity yield: 24.1 % (t = 80 min), 40.0 % isolated radiochemical yield.

The isolated fraction was diluted with 200 mL water and loaded onto a C-18 SepPak. The cartridge was washed with 5 mL of water and the product eluted with 1 mL of ethanol. 78 % of the loaded activity were

recovered after elution. When instead an OASIS WAX cartridge was used, the same reformulation procedure allowed 62% recovery of initial activity.

In the dose reformulated via a C-18 solid phase extraction, the ruthenium content by ICP was determined to be 101 ppb, which is almost tenfold below the US pharmacopoeia specified limit of 1 ppm for safe injections into human subjects. When the dose was reformulated with an OASIS WAX cartridge instead, that level dropped to 33 ppb. If for different molecules those levels cannot be reached by HPLC and reformulation, commercial chelator cartridges are available for removal of ruthenium impurities by filtration.

The reformulated dose was passed through a sterile filter unit (Millex GP, 0.22  $\mu\text{m}$ ), which led to a loss of 5 % activity. The total activity yield including reformulation with a C-18 SPE and filtration is 18 %.

The radiochemical identity was confirmed by analytical HPLC on an Eclipse XDB-C18 column (10  $\times$  4.6 mm, 5  $\mu\text{M}$ ), by a gradient from 5% MeCN/H<sub>2</sub>O/0.1% TFA to 95% MeCN/H<sub>2</sub>O/0.1%TFA within 10 min at a flow rate of 2 mL/min. (Figure S58)

Specific activity was determined to be 2.5 mCi/nmol (92 MBq/nmol) (7.84 nmol/mL molar concentration in sample by calibration curve, 19.6 mCi/mL (726 MBq/mL) activity concentration at end of synthesis) (Figure S59) via a calibration curve (Figure S60) acquired with an authentic standard for *N*-acetyl-4-fluoro-*L*-phenylalanine methyl ester, with the same analytical HPLC method as for the confirmation of radiochemical identity and a 30  $\mu\text{L}$  injection per sample. We determined the total impurity concentration in the formulated dose to be 3.6  $\mu\text{g/mL}$ . Further optimization is needed for human injection grade purity, but unoptimized impurity levels are within an order of magnitude of acceptable levels.

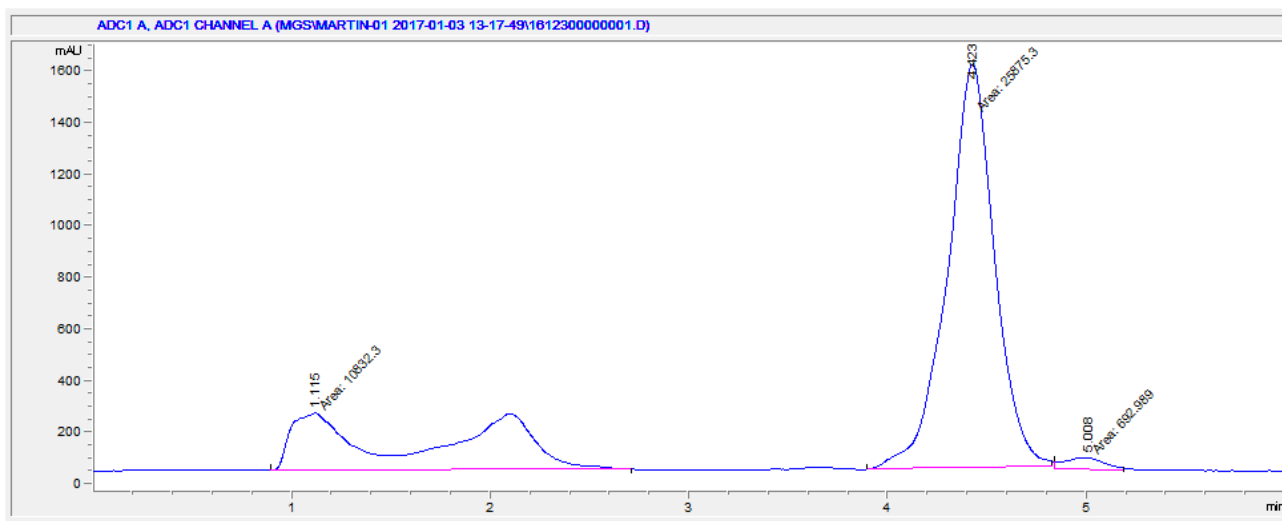

**Figure S56.** Estimate of radiochemical yield; reaction mixture  $\gamma$ -trace, RCY = 69%.

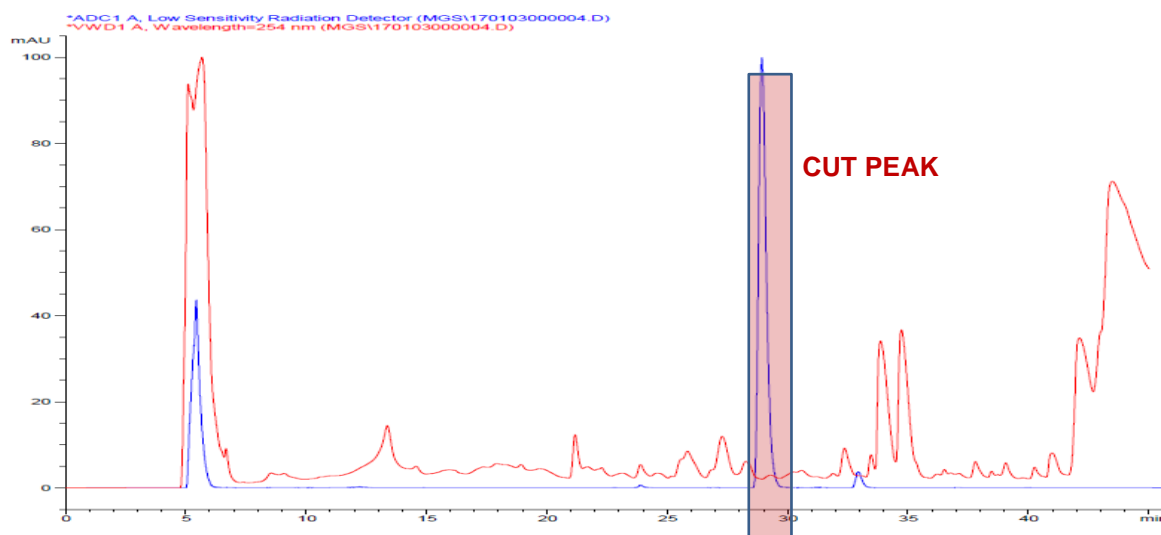

**Figure S57.** Semipreparative HPLC purification, overlay of  $\gamma$ -trace (blue) and UV(254nm) trace (red).

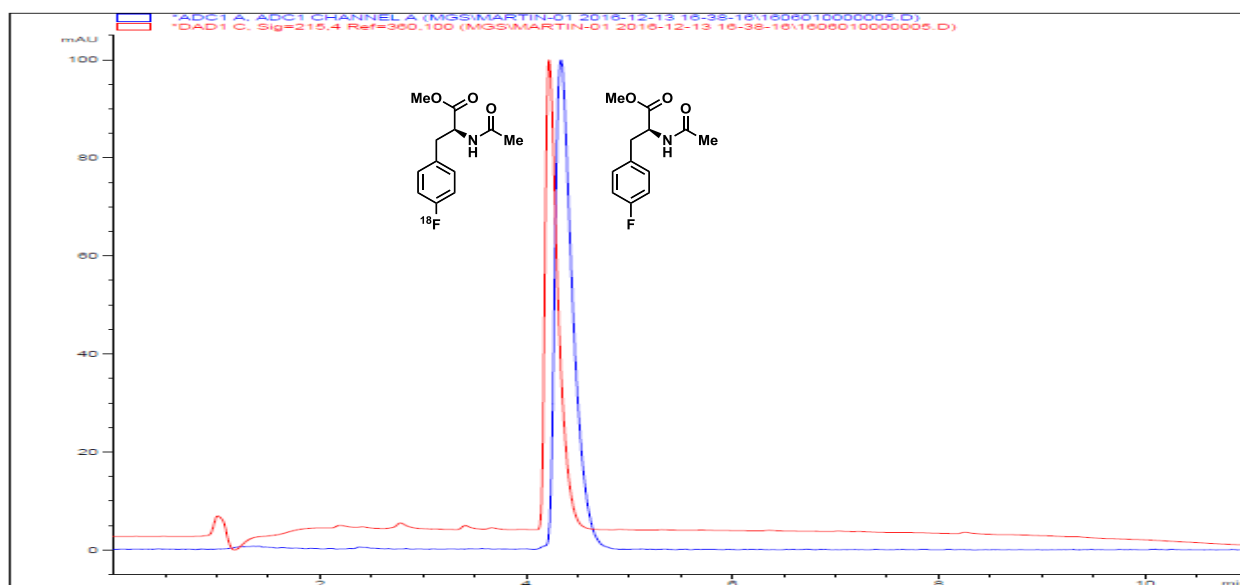

**Figure S58.** Confirmation of radiochemical identity; overlay of  $\gamma$ -trace (blue) and UV (254nm) trace (red).

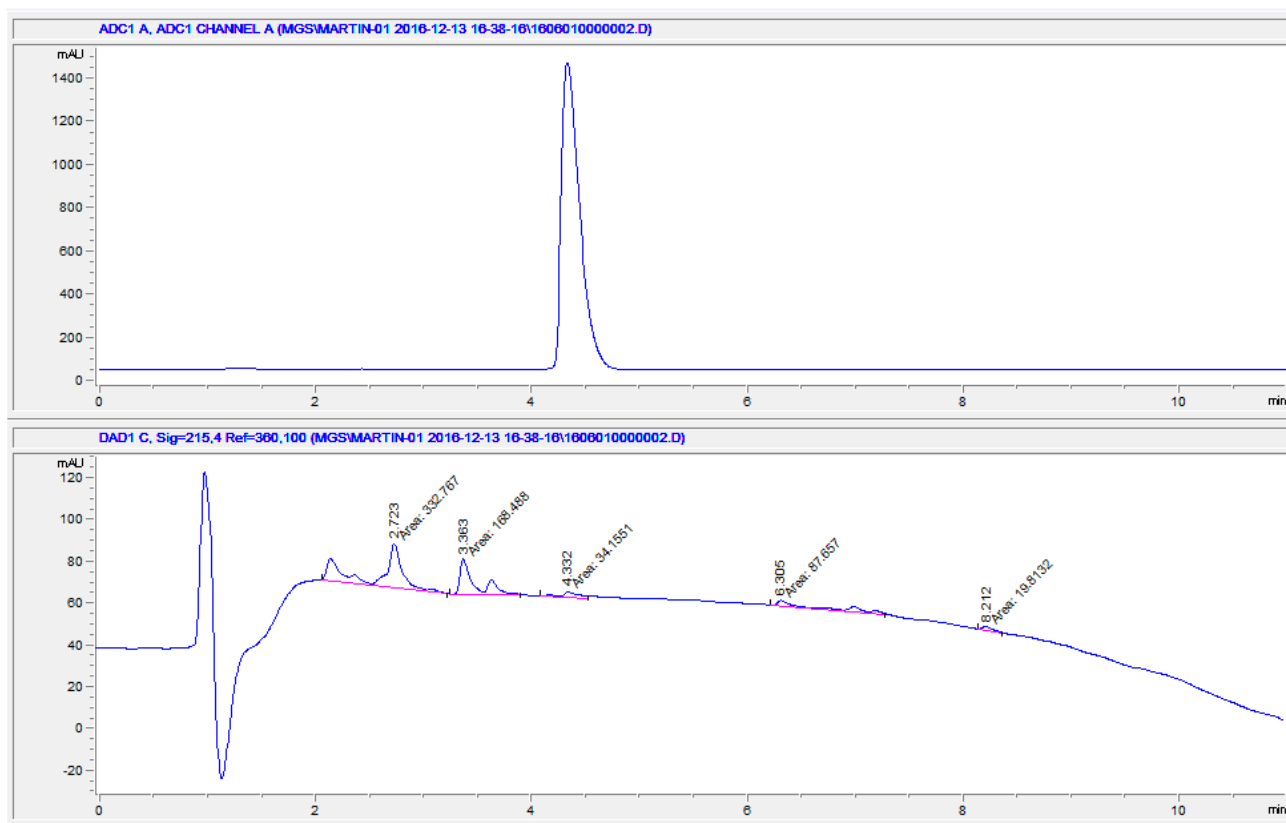

**Figure S59.** Determination of Specific Activity;  $\gamma$ -trace (top) and UV(215nm) trace (bottom) of 10x concentrated purified fraction; AUC = 36.05.

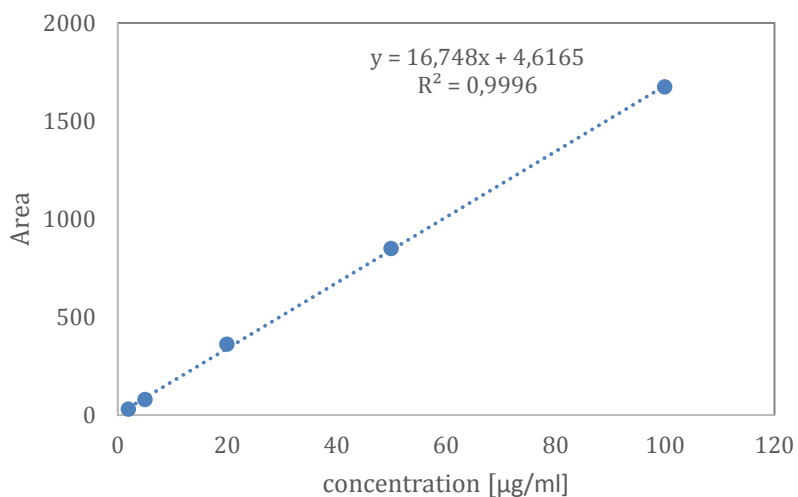

**Figure S60.** Calibration curve acquired with authentic standard at 215 nm (averaged triplicate) for determination of specific activity.

**Determination of enantiopurity:** A racemic standard was analyzed on a Chiralcel AD column (250  $\times$  4.6 mm,

10  $\mu\text{m}$ ) with 10% isopropanol in hexanes at a flow rate of 1 ml/min and monitored at 254 nm. (*R*)- and (*L*)-*N*-acetyl-4-fluoro-phenylalanine methyl ester separated well under these conditions. Coinjection with a sample of the reaction mixture showed the retention of stereochemical information through the labeling procedure. (Figure S61)

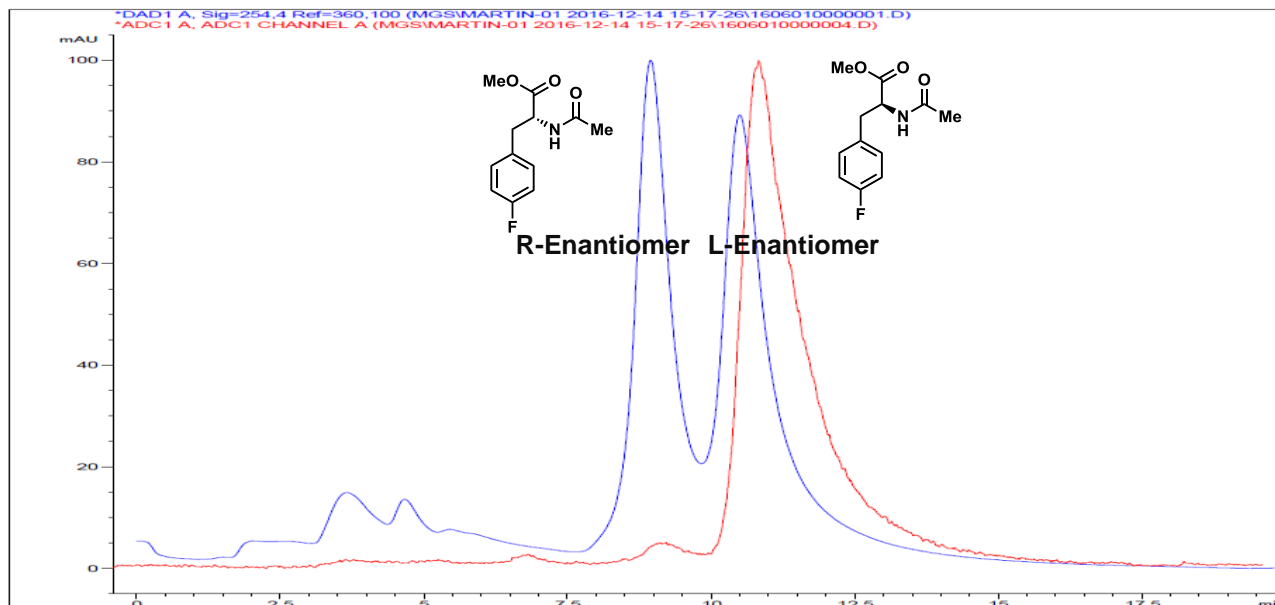

**Figure S61.** Coinjection of racemic *N*-acetyl-4-fluoro-phenylalanine methyl ester with reaction mixture, enantiomeric excess (e.e.) of labeling product determined >97%; UV(254nm) trace in blue,  $\gamma$ -trace in red.

#### Automated radiosynthesis of [ $^{18}\text{F}$ ]- $\beta$ -CFT (**4**)

**Radiosynthesis:** **3** (5.0 mg, 18  $\mu\text{M}$ , 1.0 eq), [CpRu(COD)Cl] (**1**) (10 mg, 27  $\mu\text{mol}$ , 1.5 eq) and **2** (30 mg, 65  $\mu\text{mol}$ , 3.6 eq) were heated in 250  $\mu\text{L}$  ethanol (200 proof) at 85  $^{\circ}\text{C}$  (heating block temperature) for 30 min to constitute the eluent.

On an automated synthesis platform (Elixys, Sofie Biosciences), aqueous  $^{18}\text{F}$ -fluoride was trapped on a QMA cartridge and 1 mL 200 proof ethanol was passed through the cartridge to remove residual water. 409 mCi (15.1 GBq) were measured at  $t = 0$ . The eluent was used to elute fluoride off the QMA into a 3 mL Wheaton V-vial (adapter as specified). In order to flush the pipe, 0.8 mL 1:1 DMSO/MeCN were used and collected in the V-vial as well.

Remaining on Cartridge: 28.9 mCi (1.07 GBq) ( $t = 42$  min), in reactor (after reaction): 200 mCi (7.4 GBq) ( $t = 46$  min)

Elution efficiency: 65.5%



The mixture was stirred at elevated temperature (set-point at 160 °C) for 30 min and subsequently cooled to 23 °C. A sample was used to estimate the radiochemical yield by analytical HPLC (73% RCY, determined by analytical HPLC on an Eclipse XDB-C18 column (10x4.6 mm, 5 $\mu$ M) by a gradient from 5% MeCN/H<sub>2</sub>O/0.1% TFA to 95% MeCN/H<sub>2</sub>O/0.1%TFA within 10 min at a flow of 2 mL/min, Figure S62). An analytical sample was obtained by diluting the reaction mixture with water to 2 mL and subsequent purification via semipreparative HPLC on a Gemini NX-C18 column (250 × 10 mm, 5  $\mu$ m) with a gradient from 5% MeCN/Water/0.1% TFA to 60% MeCN/Water/0.1% TFA within 45 min at 3 mL/min. The pure sample was used to confirm the radiochemical identity of the product (Figures S63 and S64) and for determination of the specific activity with the same analytical HPLC conditions used for the estimation of radiochemical yield. The product has very low UV absorption and the amount of  $\beta$ -CFT in the purified sample was below the detection limit. At the measured radioactivity concentration, the specific activity was determined to be greater than 1.5 mCi/nmol (56 GBq/ $\mu$ mol). The majority of the product was not retained on the column and an isolated yield could not be determined. Based on the content of product in the solvent front as determined by HPLC, we estimate that under appropriate purification conditions an isolated activity yield of ca. 30 % can be achieved. Based on our experience, we recommend to investigate SPE protocols and subsequent HILIC or normal phase chromatography.

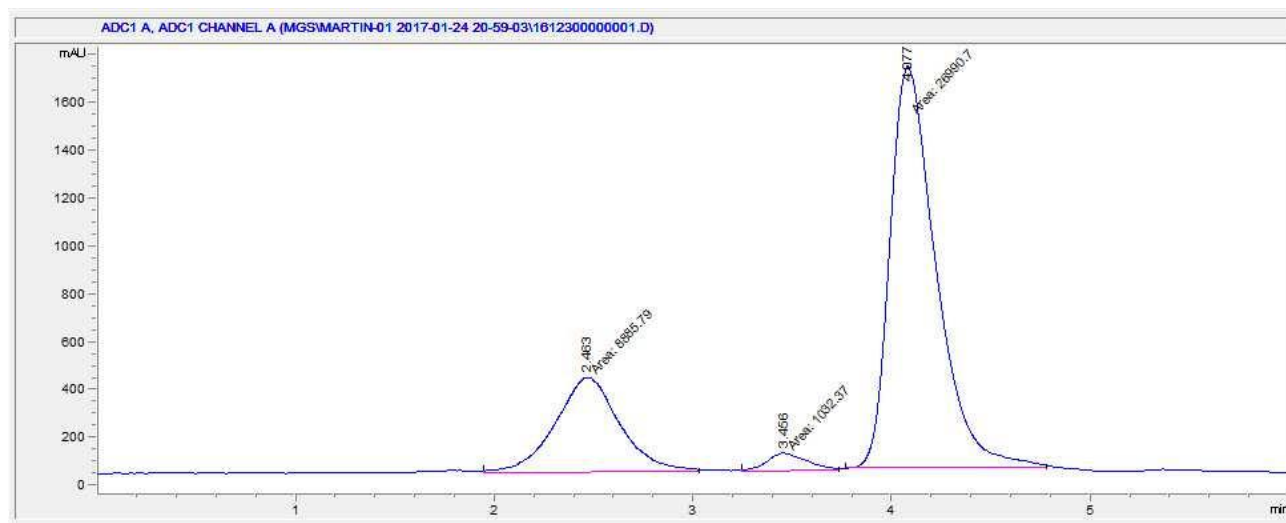

**Figure S62.** Analytical HPLC of reaction mixture to estimate radiochemical yield,  $\gamma$ -trace.

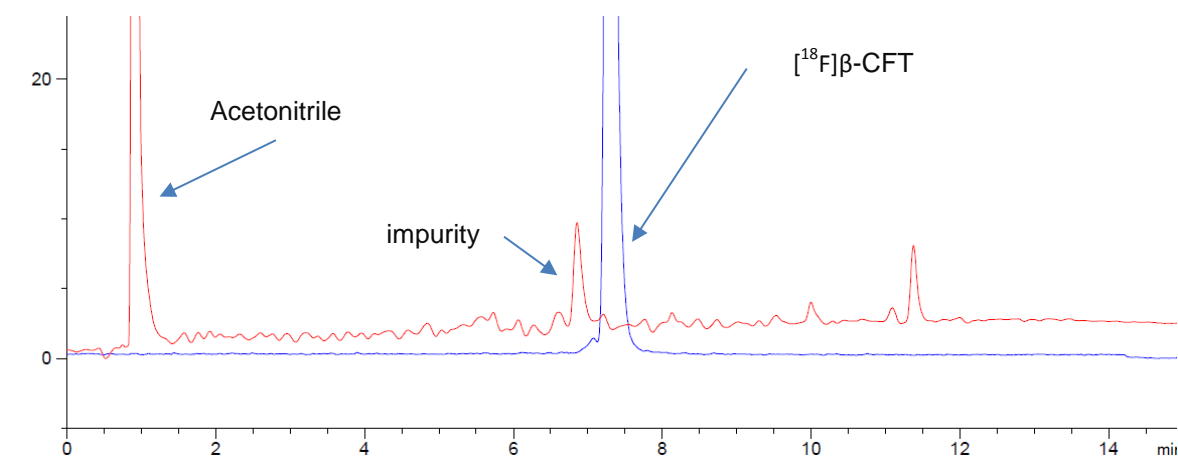

**Figure S63.** HPLC trace of purified analytical sample, UV(210nm)-trace in red,  $\gamma$ -trace in blue.

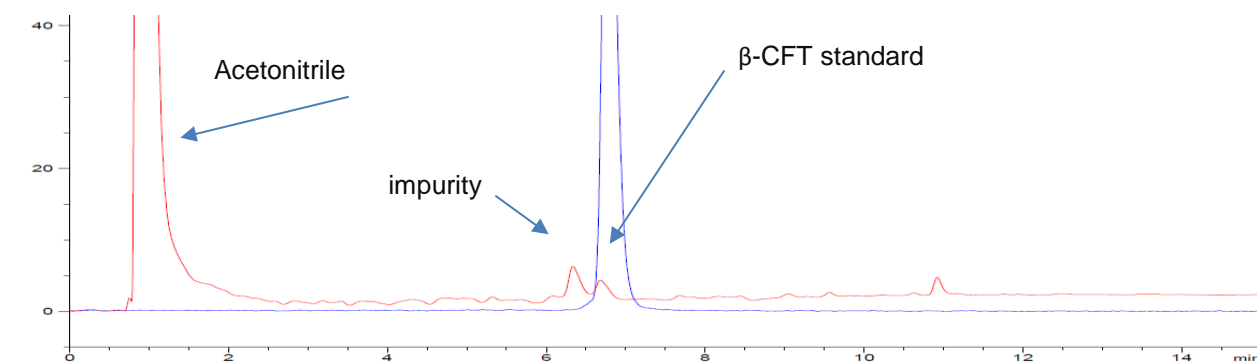

**Figure S64.** HPLC trace of analytical sample of β-CFT with added authentic standard of β-CFT, UV(210nm)-trace in red,  $\gamma$ -trace in blue.



---

|   |          |          |          |
|---|----------|----------|----------|
| C | 0.62018  | 5.15528  | 0.36202  |
| C | 1.38357  | 4.65849  | -0.69044 |
| C | 1.94600  | 3.37542  | -0.63870 |
| C | 2.58147  | -2.89923 | -1.02878 |
| C | 2.29298  | -4.25321 | -1.24892 |
| C | 1.65356  | -5.02232 | -0.28098 |
| C | 1.30147  | -4.45297 | 0.94096  |
| C | 1.55827  | -3.10267 | 1.21148  |
| C | 2.57090  | -2.04726 | -3.42209 |
| C | 4.75557  | -2.70587 | -2.30443 |
| C | 1.22056  | -2.53030 | 2.58518  |
| C | 2.19134  | -3.07282 | 3.65439  |
| C | -0.23999 | -2.79489 | 2.99289  |
| C | 2.83143  | 2.90207  | -1.78749 |
| C | 2.05734  | 2.83214  | -3.11722 |
| C | 4.08499  | 3.79036  | -1.91997 |
| C | 0.77060  | 2.29790  | 2.89773  |
| C | 1.65284  | 2.88641  | 4.01849  |
| C | -0.69937 | 2.21759  | 3.34758  |
| H | 4.36987  | -1.09142 | 1.44853  |
| H | 4.10317  | 1.65853  | 1.61385  |
| H | -0.15182 | 4.79197  | 2.33120  |
| H | 0.19910  | 6.15545  | 0.30326  |
| H | 1.55909  | 5.28181  | -1.56262 |
| H | 2.58714  | -4.71388 | -2.18762 |
| H | 1.44538  | -6.07191 | -0.47091 |

---

|   |          |          |          |
|---|----------|----------|----------|
| H | 0.83185  | -5.07055 | 1.70116  |
| H | 1.59785  | -1.56661 | -3.28070 |
| H | 2.40416  | -3.04361 | -3.84809 |
| H | 3.13456  | -1.46240 | -4.15814 |
| H | 5.32300  | -2.72761 | -1.36743 |
| H | 4.71372  | -3.72957 | -2.69428 |
| H | 5.31405  | -2.09776 | -3.02550 |
| H | 1.35194  | -1.44668 | 2.53723  |
| H | 3.23212  | -2.84214 | 3.40276  |
| H | 2.10447  | -4.16123 | 3.75344  |
| H | 1.97187  | -2.62709 | 4.63166  |
| H | -0.93386 | -2.39860 | 2.24354  |
| H | -0.44555 | -3.86434 | 3.11616  |
| H | -0.45595 | -2.30898 | 3.95175  |
| H | 3.17078  | 1.89038  | -1.55749 |
| H | 2.70951  | 2.46041  | -3.91597 |
| H | 1.68676  | 3.81739  | -3.42379 |
| H | 1.20318  | 2.15289  | -3.03308 |
| H | 4.73898  | 3.40512  | -2.71085 |
| H | 3.82549  | 4.82400  | -2.17661 |
| H | 4.65802  | 3.81151  | -0.98629 |
| H | 1.10906  | 1.27514  | 2.71470  |
| H | 1.55225  | 2.29360  | 4.93518  |
| H | 1.36485  | 3.91839  | 4.25096  |
| H | 2.71019  | 2.89088  | 3.73245  |
| H | -0.78387 | 1.58793  | 4.24110  |

---

|    |          |          |          |
|----|----------|----------|----------|
| H  | -1.10730 | 3.20205  | 3.60370  |
| H  | -1.32655 | 1.78245  | 2.56180  |
| C  | 1.61004  | 0.11589  | 0.07604  |
| F  | 1.43142  | 0.18296  | -1.35739 |
| O  | 0.22065  | -0.04342 | 0.52298  |
| C  | -0.77577 | -0.06520 | -0.41271 |
| C  | -1.21742 | -1.29852 | -0.96515 |
| C  | -1.45471 | 1.13068  | -0.76686 |
| C  | -2.25885 | -1.31987 | -1.92468 |
| H  | -0.75390 | -2.21991 | -0.63324 |
| C  | -2.49462 | 1.11184  | -1.73561 |
| H  | -1.17039 | 2.05958  | -0.28670 |
| C  | -2.84753 | -0.10576 | -2.38835 |
| H  | -2.60533 | -2.25646 | -2.34609 |
| H  | -2.99892 | 2.03698  | -1.98360 |
| O  | -3.76194 | -0.22442 | -3.35711 |
| C  | 3.34611  | -2.11726 | -2.09285 |
| H  | 3.46949  | -1.09325 | -1.73546 |
| C  | -4.50345 | 0.93407  | -3.76860 |
| H  | -5.16399 | 0.58647  | -4.56161 |
| H  | -3.83466 | 1.70792  | -4.15852 |
| H  | -5.09799 | 1.32602  | -2.93609 |
| Ru | -3.05592 | -0.31085 | -0.04379 |
| C  | -4.18896 | 0.61207  | 1.63514  |
| C  | -3.45750 | -0.51321 | 2.13286  |
| C  | -3.94100 | -1.6839  | 1.46516  |

|   |          |          |          |
|---|----------|----------|----------|
| C | -4.97440 | -1.2821  | 0.55912  |
| C | -5.12702 | 0.13489  | 0.66416  |
| H | -3.58952 | -2.69511 | 1.61914  |
| H | -5.53457 | -1.93529 | -0.09652 |
| H | -2.67163 | -0.48336 | 2.87490  |
| H | -4.06021 | 1.64119  | 1.94216  |
| H | -5.82472 | 0.74243  | 0.10344  |

E = -1969.07130881 a.u. (basis set: Ru: LANL2DZ, other atoms: 6-311++G(d,p))

No imaginary frequencies.

### Uronium fluoride RuCp 4-methoxyphenol

Spin Multiplicity = 1

Charge = 1

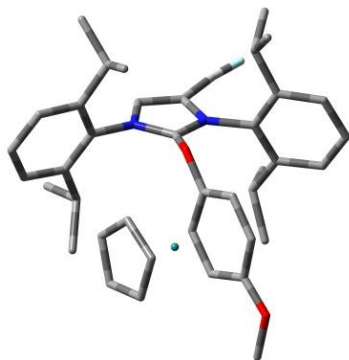

|   |          |          |          |
|---|----------|----------|----------|
| N | -1.14779 | 1.93042  | 0.68088  |
| C | -2.37504 | 2.14403  | 1.32395  |
| C | -3.20151 | 1.06006  | 1.16034  |
| N | -2.42213 | 0.17629  | 0.38609  |
| C | -2.84468 | -1.12154 | -0.10779 |
| C | -0.03193 | 2.84956  | 0.61753  |

---

|   |          |          |          |
|---|----------|----------|----------|
| C | -2.78064 | -2.23360 | 0.75609  |
| C | -3.12211 | -3.48075 | 0.21652  |
| C | -3.52819 | -3.60622 | -1.10969 |
| C | -3.64849 | -2.47693 | -1.91618 |
| C | -3.32560 | -1.20426 | -1.42932 |
| C | 0.15035  | 3.61315  | -0.55360 |
| C | 1.23196  | 4.50387  | -0.57594 |
| C | 2.07327  | 4.64642  | 0.52454  |
| C | 1.84840  | 3.89907  | 1.67944  |
| C | 0.79186  | 2.98187  | 1.75621  |
| C | -0.05136 | 3.07963  | -3.02885 |
| C | -1.50862 | 4.88048  | -1.97960 |
| C | 0.54714  | 2.21155  | 3.05189  |
| C | -0.06040 | 3.13302  | 4.13087  |
| C | 1.82282  | 1.53091  | 3.58501  |
| C | -3.63489 | 0.04183  | -2.25124 |
| C | -3.22826 | -0.06964 | -3.72943 |
| C | -5.13732 | 0.37218  | -2.09159 |
| C | -2.49562 | -2.09352 | 2.24797  |
| C | -3.83983 | -2.06390 | 3.01239  |
| C | -1.57075 | -3.18727 | 2.80945  |
| H | -2.53999 | 3.07770  | 1.83965  |
| H | -4.60568 | 0.63930  | 1.34346  |
| H | -3.09112 | -4.36197 | 0.84926  |
| H | -3.78728 | -4.58423 | -1.50601 |
| H | -4.02330 | -2.58248 | -2.92921 |



---

|   |          |          |          |
|---|----------|----------|----------|
| H | 1.40374  | 5.10797  | -1.46163 |
| H | 2.89690  | 5.35391  | 0.48929  |
| H | 2.49701  | 4.03860  | 2.53857  |
| H | 0.42636  | 2.10424  | -2.88251 |
| H | 0.72156  | 3.79766  | -3.32638 |
| H | -0.75822 | 2.99055  | -3.86117 |
| H | -2.06223 | 5.18821  | -1.08642 |
| H | -0.80199 | 5.67904  | -2.23188 |
| H | -2.22123 | 4.79023  | -2.80681 |
| H | -0.18921 | 1.42464  | 2.85195  |
| H | -0.99861 | 3.58320  | 3.79207  |
| H | 0.62966  | 3.94502  | 4.38669  |
| H | -0.26783 | 2.56370  | 5.04362  |
| H | 2.29672  | 0.90059  | 2.82281  |
| H | 2.56581  | 2.26384  | 3.91731  |
| H | 1.57862  | 0.90267  | 4.44881  |
| H | -3.07704 | 0.88338  | -1.82732 |
| H | -3.41913 | 0.88063  | -4.24061 |
| H | -3.80076 | -0.83986 | -4.25767 |
| H | -2.16254 | -0.30545 | -3.83991 |
| H | -5.36681 | 1.33587  | -2.56203 |
| H | -5.75103 | -0.39581 | -2.57815 |
| H | -5.41972 | 0.41120  | -1.03394 |
| H | -2.00665 | -1.12703 | 2.41644  |
| H | -4.51849 | -1.31826 | 2.58766  |
| H | -4.32965 | -3.04372 | 2.95221  |

---

|   |          |          |          |
|---|----------|----------|----------|
| H | -3.66868 | -1.83697 | 4.07177  |
| H | -1.3443  | -2.97785 | 3.86112  |
| H | -2.03916 | -4.17676 | 2.77319  |
| H | -0.62313 | -3.24679 | 2.26067  |
| C | -1.21647 | 0.71332  | 0.11998  |
| O | -0.31382 | 0.25584  | -0.78315 |
| C | 0.46246  | -0.85200 | -0.52305 |
| C | 0.84663  | -1.62746 | -1.64514 |
| C | 0.97625  | -1.15866 | 0.75939  |
| C | 1.67527  | -2.76103 | -1.46543 |
| H | 0.50447  | -1.33973 | -2.63225 |
| C | 1.79807  | -2.30711 | 0.93879  |
| H | 0.7431   | -0.52666 | 1.60759  |
| C | 2.08235  | -3.17049 | -0.15996 |
| H | 1.97572  | -3.36238 | -2.31539 |
| C | -0.78752 | 3.53602  | -1.75426 |
| H | -1.56292 | 2.79433  | -1.54124 |
| F | -5.56133 | 0.17424  | 1.30232  |
| H | 2.17850  | -2.52494 | 1.92834  |
| O | 2.77345  | -4.30921 | -0.08785 |
| C | 3.31324  | -4.73064 | 1.17622  |
| H | 3.79225  | -5.68817 | 0.97841  |
| H | 2.51592  | -4.86120 | 1.91432  |
| H | 4.05714  | -4.01153 | 1.53555  |
| C | 4.49649  | -0.50763 | -1.95557 |
| C | 3.70467  | 0.67905  | -1.83509 |

|    |         |          |          |
|----|---------|----------|----------|
| C  | 4.98931 | -0.84464 | -0.65566 |
| C  | 3.70637 | 1.07760  | -0.46209 |
| C  | 4.49699 | 0.13435  | 0.26867  |
| Ru | 2.77020 | -0.94339 | -0.62059 |
| H  | 4.68413 | -1.05707 | -2.86846 |
| H  | 3.18786 | 1.18239  | -2.64113 |
| H  | 3.19002 | 1.93305  | -0.04684 |
| H  | 4.69562 | 0.16126  | 1.33160  |
| H  | 5.62325 | -1.68749 | -0.41576 |

E = -1969.04088433 a.u. (basis set: Ru: LANL2DZ, other atoms: 6-311++G(d,p))

No imaginary frequencies.

### TS1 RuCp 4-methoxyphenol

Spin Multiplicity = 1

Charge = 1

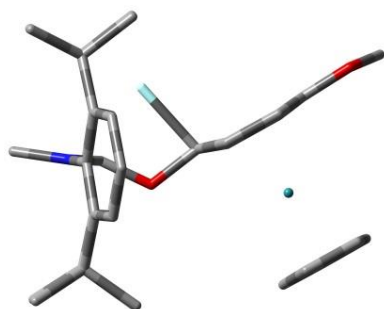

|   |         |          |         |
|---|---------|----------|---------|
| N | 2.49134 | -0.91731 | 0.09708 |
| C | 3.78278 | -0.38568 | 0.10458 |
| C | 3.66725 | 0.96012  | 0.18953 |
| N | 2.30489 | 1.26209  | 0.23483 |
| C | 1.73859 | 2.59019  | 0.32663 |
| C | 2.15893 | -2.32325 | 0.01333 |

---

|   |         |          |          |
|---|---------|----------|----------|
| C | 1.33876 | 3.05848  | 1.59564  |
| C | 0.78695 | 4.34432  | 1.66202  |
| C | 0.65743 | 5.13013  | 0.51928  |
| C | 1.08959 | 4.64969  | -0.71443 |
| C | 1.64478 | 3.36959  | -0.84612 |
| C | 2.19511 | -2.95299 | -1.24921 |
| C | 1.87578 | -4.31713 | -1.28751 |
| C | 1.54249 | -5.01707 | -0.13065 |
| C | 1.53618 | -4.37000 | 1.10268  |
| C | 1.85202 | -3.00929 | 1.20698  |
| C | 1.52301 | -2.33033 | -3.62240 |
| C | 3.96005 | -2.77165 | -3.04051 |
| C | 1.88499 | -2.34559 | 2.58035  |
| C | 3.00644 | -2.94041 | 3.45560  |
| C | 0.52105 | -2.43123 | 3.29077  |
| C | 2.16191 | 2.90449  | -2.20474 |
| C | 1.07153 | 2.95378  | -3.29004 |
| C | 3.40259 | 3.72282  | -2.61582 |
| C | 1.51660 | 2.24565  | 2.87463  |
| C | 2.53601 | 2.91653  | 3.81732  |
| C | 0.17561 | 1.99997  | 3.59079  |
| H | 4.64990 | -1.02414 | 0.05767  |
| H | 4.41233 | 1.73808  | 0.22976  |
| H | 0.46856 | 4.73958  | 2.62218  |
| H | 0.23173 | 6.12707  | 0.59333  |
| H | 1.00300 | 5.28181  | -1.59308 |

---

|   |          |          |          |
|---|----------|----------|----------|
| H | 1.89593  | -4.83888 | -2.23940 |
| H | 1.29958  | -6.07450 | -0.18832 |
| H | 1.29677  | -4.93255 | 2.00019  |
| H | 0.61743  | -1.81690 | -3.29087 |
| H | 1.28010  | -3.36737 | -3.88129 |
| H | 1.87405  | -1.83499 | -4.53501 |
| H | 4.74458  | -2.67846 | -2.28065 |
| H | 3.89490  | -3.82966 | -3.32055 |
| H | 4.27834  | -2.21076 | -3.92659 |
| H | 2.11225  | -1.28395 | 2.44414  |
| H | 3.98439  | -2.84010 | 2.97225  |
| H | 2.83758  | -4.00506 | 3.65250  |
| H | 3.04852  | -2.42392 | 4.42130  |
| H | -0.26754 | -1.98910 | 2.67297  |
| H | 0.24379  | -3.46876 | 3.50932  |
| H | 0.55598  | -1.89103 | 4.24396  |
| H | 2.44930  | 1.85604  | -2.11997 |
| H | 1.49541  | 2.64604  | -4.25289 |
| H | 0.65489  | 3.95954  | -3.41852 |
| H | 0.26896  | 2.25586  | -3.03977 |
| H | 3.80408  | 3.34860  | -3.56450 |
| H | 3.15941  | 4.78329  | -2.75046 |
| H | 4.19697  | 3.65807  | -1.86313 |
| H | 1.92367  | 1.26614  | 2.60541  |
| H | 2.68821  | 2.30111  | 4.71125  |
| H | 2.18885  | 3.90296  | 4.14450  |

---

|    |          |          |          |
|----|----------|----------|----------|
| H  | 3.50574  | 3.04937  | 3.32532  |
| H  | 0.32957  | 1.37256  | 4.47633  |
| H  | -0.28234 | 2.93764  | 3.92529  |
| H  | -0.53150 | 1.49186  | 2.92681  |
| C  | 1.60689  | 0.10883  | 0.09688  |
| F  | 0.84273  | 0.17316  | -1.77240 |
| O  | 0.32681  | -0.02981 | 0.51038  |
| C  | -0.66565 | -0.04037 | -0.48396 |
| C  | -1.25492 | -1.29033 | -0.82460 |
| C  | -1.47250 | 1.12232  | -0.61904 |
| C  | -2.39900 | -1.32440 | -1.66233 |
| H  | -0.75674 | -2.20800 | -0.53999 |
| C  | -2.61934 | 1.10209  | -1.46237 |
| H  | -1.13757 | 2.05329  | -0.17964 |
| C  | -3.03972 | -0.11719 | -2.06793 |
| H  | -2.79980 | -2.26739 | -2.01577 |
| H  | -3.16086 | 2.02309  | -1.63586 |
| O  | -4.06344 | -0.24673 | -2.92596 |
| C  | 2.60616  | -2.23576 | -2.53255 |
| H  | 2.71260  | -1.17320 | -2.31062 |
| C  | -4.85498 | 0.90455  | -3.24478 |
| H  | -5.59360 | 0.55746  | -3.96647 |
| H  | -4.24107 | 1.69018  | -3.69735 |
| H  | -5.36297 | 1.28587  | -2.35139 |
| Ru | -2.98254 | -0.31035 | 0.26878  |
| C  | -4.05797 | 0.64060  | 1.96491  |

|   |          |          |         |
|---|----------|----------|---------|
| C | -3.14533 | -0.33212 | 2.48800 |
| C | -3.53865 | -1.61573 | 1.99132 |
| C | -4.69719 | -1.43904 | 1.17122 |
| C | -5.01861 | -0.04675 | 1.15432 |
| H | -3.04367 | -2.55519 | 2.19682 |
| H | -2.31147 | -0.13406 | 3.14679 |
| H | -5.22747 | -2.22039 | 0.64332 |
| H | -5.84132 | 0.40775  | 0.61876 |
| H | -4.03657 | 1.70408  | 2.16140 |

E = -1969.06291917 a. u. (basis set: Ru: LANL2DZ, other atoms: 6-311++G(d,p))

Imaginary frequency: -283.6 cm<sup>-1</sup>

### Meisenheimer intermediate RuCp 4-methoxyphenol

Spin multiplicity = 1

Charge = 1

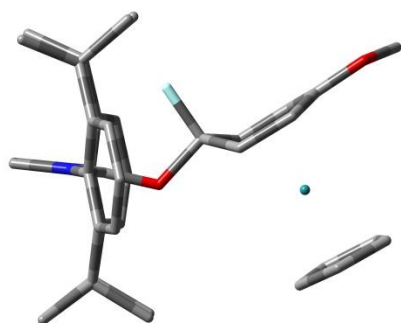

|   |         |          |         |
|---|---------|----------|---------|
| N | 2.63356 | -0.68183 | 0.08803 |
| C | 3.85805 | -0.02666 | 0.03313 |
| C | 3.60769 | 1.30767  | 0.05876 |
| N | 2.22873 | 1.47014  | 0.12945 |
| C | 1.52941 | 2.74163  | 0.18956 |
| C | 2.45419 | -2.12326 | 0.09178 |

---

|   |          |          |          |
|---|----------|----------|----------|
| C | 1.12206  | 3.21910  | 1.45127  |
| C | 0.45709  | 4.45139  | 1.47830  |
| C | 0.22961  | 5.17345  | 0.30966  |
| C | 0.66341  | 4.67917  | -0.91798 |
| C | 1.32319  | 3.44719  | -1.01409 |
| C | 2.54243  | -2.80968 | -1.13725 |
| C | 2.40192  | -4.20257 | -1.09314 |
| C | 2.18252  | -4.86985 | 0.10922  |
| C | 2.10718  | -4.15888 | 1.30417  |
| C | 2.24831  | -2.76568 | 1.32894  |
| C | 1.78351  | -2.49967 | -3.54935 |
| C | 4.24947  | -2.40479 | -2.95440 |
| C | 2.19903  | -2.02406 | 2.66158  |
| C | 3.39301  | -2.41176 | 3.55693  |
| C | 0.85851  | -2.24622 | 3.38751  |
| C | 1.81013  | 2.94957  | -2.37320 |
| C | 0.68402  | 2.91776  | -3.42377 |
| C | 3.00007  | 3.79757  | -2.86839 |
| C | 1.38483  | 2.47319  | 2.75575  |
| C | 2.28965  | 3.29481  | 3.69557  |
| C | 0.06977  | 2.07305  | 3.45273  |
| H | 4.78427  | -0.57592 | -0.01269 |
| H | 4.27137  | 2.15680  | 0.03873  |
| H | 0.12170  | 4.85386  | 2.42916  |
| H | -0.28208 | 6.13049  | 0.35670  |
| H | 0.48881  | 5.26004  | -1.81810 |



---

|   |          |          |          |
|---|----------|----------|----------|
| H | 2.46782  | -4.77159 | -2.01502 |
| H | 2.07665  | -5.95083 | 0.11579  |
| H | 1.94588  | -4.69351 | 2.23498  |
| H | 0.76611  | -2.27023 | -3.22150 |
| H | 1.83554  | -3.56331 | -3.80595 |
| H | 1.98071  | -1.93162 | -4.46536 |
| H | 4.99946  | -2.07766 | -2.22535 |
| H | 4.40015  | -3.47629 | -3.12785 |
| H | 4.44357  | -1.88102 | -3.89715 |
| H | 2.28322  | -0.94993 | 2.46644  |
| H | 4.34757  | -2.20508 | 3.06051  |
| H | 3.37189  | -3.47671 | 3.81319  |
| H | 3.36472  | -1.84195 | 4.49250  |
| H | 0.01620  | -1.94662 | 2.75528  |
| H | 0.71962  | -3.29675 | 3.66603  |
| H | 0.82770  | -1.65310 | 4.30858  |
| H | 2.16028  | 1.91970  | -2.25991 |
| H | 1.07295  | 2.52336  | -4.36901 |
| H | 0.28267  | 3.91698  | -3.62496 |
| H | -0.13692 | 2.27150  | -3.10101 |
| H | 3.37135  | 3.40820  | -3.82294 |
| H | 2.70426  | 4.84125  | -3.02369 |
| H | 3.83017  | 3.79063  | -2.15304 |
| H | 1.92343  | 1.54819  | 2.52454  |
| H | 2.51542  | 2.71904  | 4.60005  |
| H | 1.80520  | 4.22700  | 4.00632  |

---

|   |          |          |          |
|---|----------|----------|----------|
| H | 3.23698  | 3.55471  | 3.21070  |
| H | 0.28368  | 1.49617  | 4.35980  |
| H | -0.50980 | 2.95484  | 3.74986  |
| H | -0.55380 | 1.46089  | 2.79336  |
| C | 1.65522  | 0.24728  | 0.14928  |
| F | 0.32958  | -0.07550 | -1.90725 |
| O | 0.37742  | 0.00704  | 0.36649  |
| C | -0.54545 | -0.17459 | -0.77529 |
| C | -1.23629 | -1.47635 | -0.64388 |
| C | -1.60174 | 0.85970  | -0.73646 |
| C | -2.38634 | -1.72124 | -1.44740 |
| H | -0.69320 | -2.31271 | -0.21931 |
| C | -2.75764 | 0.68591  | -1.55959 |
| H | -1.34164 | 1.85530  | -0.39517 |
| C | -3.11712 | -0.62470 | -1.99249 |
| H | -2.74906 | -2.72779 | -1.62348 |
| H | -3.37762 | 1.54005  | -1.80267 |
| O | -4.15677 | -0.92872 | -2.80173 |
| C | 2.81340  | -2.11565 | -2.46995 |
| H | 2.72360  | -1.03630 | -2.32081 |
| C | -5.09975 | 0.09821  | -3.11078 |
| H | -5.85762 | -0.37556 | -3.73487 |
| H | -4.62942 | 0.91591  | -3.66888 |
| H | -5.56572 | 0.48743  | -2.19729 |
| R | -3.00534 | -0.50459 | 0.29743  |
| C | -3.75841 | 0.56904  | 2.12707  |

|   |          |          |         |
|---|----------|----------|---------|
| C | -2.99312 | -0.57091 | 2.52857 |
| C | -3.66848 | -1.73914 | 2.03749 |
| C | -4.85437 | -1.31662 | 1.35947 |
| C | -4.90597 | 0.10787  | 1.41025 |
| H | -3.35384 | -2.76387 | 2.18455 |
| H | -5.57818 | -1.96304 | 0.88089 |
| H | -5.67528 | 0.73242  | 0.97554 |
| H | -2.09202 | -0.55714 | 3.12466 |
| H | -3.51792 | 1.60253  | 2.33814 |

E = - 1969.07312641 a.u. (basis set: Ru: LANL2DZ, other atoms: 6-311++G(d,p))

No imaginary frequencies.

### TS2 RuCp 4-methoxyphenol

Spin Multiplicity = 1

Charge = 1

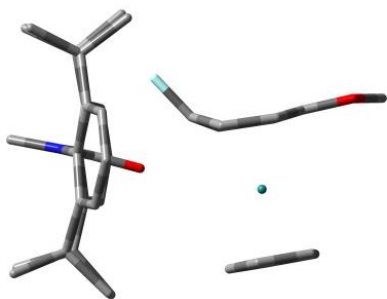

|   |         |          |          |
|---|---------|----------|----------|
| N | 2.56371 | -0.66885 | 0.00888  |
| C | 3.77808 | 0.01145  | -0.00381 |
| C | 3.50496 | 1.33528  | 0.09327  |
| N | 2.12177 | 1.47434  | 0.16817  |
| C | 1.42015 | 2.73589  | 0.2694   |
| C | 2.41654 | -2.10638 | -0.0618  |

---

|   |          |          |          |
|---|----------|----------|----------|
| C | 0.97248  | 3.15858  | 1.53963  |
| C | 0.32445  | 4.39748  | 1.61069  |
| C | 0.14170  | 5.18233  | 0.47391  |
| C | 0.60869  | 4.74578  | -0.76206 |
| C | 1.26012  | 3.51185  | -0.89785 |
| C | 2.46507  | -2.72836 | -1.32804 |
| C | 2.34248  | -4.12370 | -1.36013 |
| C | 2.18689  | -4.86249 | -0.19000 |
| C | 2.16404  | -4.22099 | 1.04566  |
| C | 2.28415  | -2.82891 | 1.14175  |
| C | 1.69642  | -2.31199 | -3.73026 |
| C | 4.15144  | -2.17861 | -3.11985 |
| C | 2.32459  | -2.16528 | 2.51509  |
| C | 3.65551  | -2.47719 | 3.23085  |
| C | 1.12219  | -2.55876 | 3.39207  |
| C | 1.80595  | 3.09008  | -2.26046 |
| C | 0.75602  | 3.19687  | -3.38237 |
| C | 3.06275  | 3.91164  | -2.61749 |
| C | 1.23683  | 2.35014  | 2.80711  |
| C | 2.53921  | 2.82622  | 3.48604  |
| C | 0.06457  | 2.38353  | 3.80273  |
| H | 4.71670  | -0.51390 | -0.07486 |
| H | 4.15784  | 2.19248  | 0.11659  |
| H | -0.03283 | 4.76034  | 2.56870  |
| H | -0.35888 | 6.14314  | 0.55520  |
| H | 0.47198  | 5.37409  | -1.63666 |

---

|   |          |          |          |
|---|----------|----------|----------|
| H | 2.38076  | -4.63935 | -2.31457 |
| H | 2.09676  | -5.94391 | -0.24069 |
| H | 2.06398  | -4.81122 | 1.95135  |
| H | 0.66674  | -2.13869 | -3.40374 |
| H | 1.78479  | -3.35693 | -4.04697 |
| H | 1.87891  | -1.68724 | -4.61174 |
| H | 4.88914  | -1.88979 | -2.36307 |
| H | 4.32494  | -3.23206 | -3.36802 |
| H | 4.33978  | -1.58469 | -4.02144 |
| H | 2.27944  | -1.08072 | 2.37528  |
| H | 4.51589  | -2.15098 | 2.63618  |
| H | 3.76398  | -3.55212 | 3.41495  |
| H | 3.69616  | -1.96433 | 4.19848  |
| H | 0.17733  | -2.32969 | 2.88902  |
| H | 1.12578  | -3.62692 | 3.63558  |
| H | 1.15036  | -2.00775 | 4.33904  |
| H | 2.10074  | 2.03873  | -2.20087 |
| H | 1.18259  | 2.83142  | -4.32314 |
| H | 0.43694  | 4.23149  | -3.54882 |
| H | -0.13004 | 2.59542  | -3.15900 |
| H | 3.47730  | 3.57521  | -3.57449 |
| H | 2.82314  | 4.97719  | -2.70966 |
| H | 3.84390  | 3.81260  | -1.85564 |
| H | 1.37813  | 1.30336  | 2.51971  |
| H | 2.74722  | 2.22535  | 4.37887  |
| H | 2.45582  | 3.87445  | 3.79537  |

---

|    |          |          |          |
|----|----------|----------|----------|
| H  | 3.39948  | 2.74236  | 2.81320  |
| H  | 0.25168  | 1.67905  | 4.62073  |
| H  | -0.06550 | 3.37301  | 4.25425  |
| H  | -0.87796 | 2.10541  | 3.31940  |
| C  | 1.54053  | 0.23379  | 0.12993  |
| F  | 0.23349  | 0.18483  | -2.08138 |
| O  | 0.29787  | -0.03397 | 0.26441  |
| C  | -0.82684 | -0.07641 | -1.24177 |
| C  | -1.39028 | -1.39928 | -1.22814 |
| C  | -1.79352 | 0.95793  | -0.99757 |
| C  | -2.73977 | -1.59913 | -1.64316 |
| H  | -0.73063 | -2.25306 | -1.12970 |
| C  | -3.14988 | 0.78422  | -1.41793 |
| H  | -1.44788 | 1.94827  | -0.72732 |
| C  | -3.61097 | -0.49180 | -1.84755 |
| H  | -3.11077 | -2.60127 | -1.82514 |
| H  | -3.80701 | 1.64445  | -1.41079 |
| O  | -4.83522 | -0.76262 | -2.34544 |
| C  | 2.70673  | -1.95702 | -2.62353 |
| H  | 2.58845  | -0.89045 | -2.41386 |
| C  | -5.80551 | 0.28714  | -2.37850 |
| H  | -6.70332 | -0.15690 | -2.80787 |
| H  | -5.46959 | 1.11602  | -3.01164 |
| H  | -6.02233 | 0.65088  | -1.36714 |
| Ru | -2.85936 | -0.57390 | 0.32493  |
| C  | -3.40615 | 0.32643  | 2.28716  |

|   |          |          |         |
|---|----------|----------|---------|
| C | -2.32563 | -0.59360 | 2.48822 |
| C | -2.79019 | -1.89674 | 2.12266 |
| C | -4.15417 | -1.78614 | 1.70915 |
| C | -4.53605 | -0.41255 | 1.81290 |
| H | -2.21043 | -2.80946 | 2.14825 |
| H | -4.78324 | -2.59717 | 1.36716 |
| H | -5.50867 | -0.00381 | 1.57341 |
| H | -1.33662 | -0.34847 | 2.84603 |
| H | -3.38134 | 1.39085  | 2.47872 |

E = -1969.06194725 a.u. (basis set: Ru: LANL2DZ, other atoms: 6-311++G(d,p))

Imaginary frequency: -295.5 cm<sup>-1</sup>

### Uronium bifluoride RuCp 4-methoxyphenol

Spin Multiplicity = 1

Charge = 1

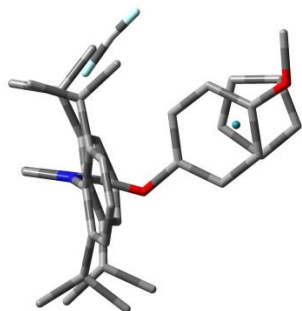

|   |          |          |         |
|---|----------|----------|---------|
| N | -1.15035 | 1.92424  | 0.80446 |
| C | -2.19809 | 2.06238  | 1.70663 |
| C | -2.97784 | 0.95668  | 1.60397 |
| N | -2.42322 | 0.13711  | 0.62919 |
| C | -3.05019 | -1.06896 | 0.09744 |
| C | -0.10233 | 2.90985  | 0.57166 |

---

|   |          |          |          |
|---|----------|----------|----------|
| C | -2.95479 | -2.27037 | 0.83208  |
| C | -3.59944 | -3.39143 | 0.29053  |
| C | -4.30710 | -3.31844 | -0.90492 |
| C | -4.40746 | -2.10784 | -1.58521 |
| C | -3.79345 | -0.94827 | -1.09713 |
| C | -0.09461 | 3.60378  | -0.65899 |
| C | 0.92781  | 4.54000  | -0.85840 |
| C | 1.87628  | 4.79622  | 0.12764  |
| C | 1.81045  | 4.12801  | 1.34650  |
| C | 0.82076  | 3.16940  | 1.60967  |
| C | -0.56495 | 3.07296  | -3.10507 |
| C | -2.02135 | 4.72650  | -1.83750 |
| C | 0.76341  | 2.52550  | 2.99202  |
| C | 0.34045  | 3.56816  | 4.04807  |
| C | 2.09420  | 1.85747  | 3.38384  |
| C | -4.01444 | 0.37278  | -1.82839 |
| C | -3.59299 | 0.30200  | -3.30777 |
| C | -5.48229 | 0.82796  | -1.68952 |
| C | -2.23845 | -2.38796 | 2.17084  |
| C | -3.25421 | -2.37300 | 3.33401  |
| C | -1.35516 | -3.65193 | 2.26100  |
| H | -2.28193 | 2.93198  | 2.33709  |
| H | -3.87807 | 0.67363  | 2.12383  |
| H | -3.54427 | -4.33493 | 0.82398  |
| H | -4.79610 | -4.20394 | -1.30110 |
| H | -4.98659 | -2.05610 | -2.50185 |



---

|   |          |          |          |
|---|----------|----------|----------|
| H | 0.96644  | 5.09279  | -1.79182 |
| H | 2.65513  | 5.53315  | -0.04696 |
| H | 2.53640  | 4.35803  | 2.1199   |
| H | 0.04033  | 2.16299  | -3.03677 |
| H | 0.06862  | 3.87355  | -3.50192 |
| H | -1.36611 | 2.89780  | -3.83126 |
| H | -2.48146 | 4.97452  | -0.87498 |
| H | -1.41976 | 5.58601  | -2.15266 |
| H | -2.82137 | 4.58868  | -2.57374 |
| H | 0.04100  | 1.70922  | 2.98652  |
| H | -0.62146 | 4.03490  | 3.80299  |
| H | 1.07908  | 4.37312  | 4.14253  |
| H | 0.24115  | 3.08734  | 5.02745  |
| H | 2.32935  | 1.04048  | 2.69604  |
| H | 2.93333  | 2.56266  | 3.40496  |
| H | 1.99905  | 1.41930  | 4.38253  |
| H | -3.40105 | 1.14495  | -1.35449 |
| H | -3.72028 | 1.28091  | -3.78332 |
| H | -4.20061 | -0.41674 | -3.86793 |
| H | -2.54305 | 0.00752  | -3.41009 |
| H | -5.62478 | 1.80262  | -2.16967 |
| H | -6.16574 | 0.11556  | -2.16440 |
| H | -5.77200 | 0.91979  | -0.63692 |
| H | -1.57523 | -1.53048 | 2.31250  |
| H | -3.84610 | -1.45065 | 3.35430  |
| H | -3.95253 | -3.21598 | 3.26537  |

---

|   |          |          |          |
|---|----------|----------|----------|
| H | -2.72282 | -2.44828 | 4.28909  |
| H | -0.59011 | -3.50057 | 3.02708  |
| H | -1.93746 | -4.54760 | 2.50851  |
| H | -0.83452 | -3.84461 | 1.31600  |
| C | -1.30519 | 0.74133  | 0.17941  |
| O | -0.58377 | 0.37255  | -0.88681 |
| C | 0.22483  | -0.76634 | -0.86339 |
| C | 0.60008  | -1.29790 | -2.12092 |
| C | 0.70439  | -1.31646 | 0.33921  |
| C | 1.40710  | -2.46427 | -2.15400 |
| H | 0.28104  | -0.81750 | -3.03802 |
| C | 1.50444  | -2.48843 | 0.29715  |
| H | 0.46065  | -0.85492 | 1.31031  |
| C | 1.79149  | -3.12249 | -0.94503 |
| H | 1.71144  | -2.89408 | -3.10096 |
| C | -1.16411 | 3.44752  | -1.73644 |
| H | -1.84031 | 2.63847  | -1.44963 |
| F | 1.32706  | -2.11856 | 3.24258  |
| H | 1.83990  | -2.86517 | 1.25643  |
| O | 2.47489  | -4.26251 | -1.08651 |
| C | 3.01577  | -4.89283 | 0.08786  |
| H | 3.52038  | -5.78779 | -0.27321 |
| H | 2.21763  | -5.16940 | 0.78306  |
| H | 3.73472  | -4.23090 | 0.58155  |
| C | 4.46067  | -0.45882 | -1.99995 |
| C | 3.67637  | 0.73809  | -1.99983 |

|    |          |          |          |
|----|----------|----------|----------|
| C  | 4.71884  | -0.81849 | -0.64024 |
| C  | 3.45131  | 1.12176  | -0.63932 |
| C  | 4.09356  | 0.15856  | 0.20236  |
| Ru | 2.52437  | -0.87414 | -0.97242 |
| H  | 4.78918  | -1.00450 | -2.87431 |
| H  | 3.31617  | 1.25985  | -2.87630 |
| H  | 2.88699  | 1.98118  | -0.30362 |
| H  | 4.10259  | 0.16409  | 1.28363  |
| H  | 5.28482  | -1.67788 | -0.30643 |
| F  | -0.08479 | -0.30450 | 2.80380  |
| H  | 0.69919  | -1.29927 | 3.14733  |

E = -2069.58422372 a.u. (basis set: Ru: LANL2DZ, other atoms: 6-311++G(d,p))

No imaginary frequencies.

### Uronium fluoride 4-methoxyphenol

Spin Multiplicity = 1

Charge = 0

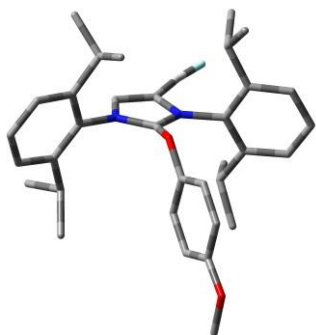

|   |          |          |         |
|---|----------|----------|---------|
| N | -1.43898 | -0.79207 | 0.72811 |
| C | -1.11657 | -1.64427 | 1.79502 |
| C | 0.22640  | -1.90675 | 1.80215 |

---

|   |          |          |          |
|---|----------|----------|----------|
| N | 0.71075  | -1.17809 | 0.69540  |
| C | 2.08534  | -1.16248 | 0.23215  |
| C | -2.76240 | -0.34089 | 0.35959  |
| C | 3.01356  | -0.31797 | 0.87050  |
| C | 4.30800  | -0.27026 | 0.33774  |
| C | 4.66405  | -1.04427 | -0.76255 |
| C | 3.74361  | -1.92375 | -1.32613 |
| C | 2.43758  | -2.01528 | -0.83183 |
| C | -3.44035 | -1.01434 | -0.67668 |
| C | -4.72731 | -0.56732 | -1.00005 |
| C | -5.32058 | 0.48482  | -0.30923 |
| C | -4.63601 | 1.11396  | 0.72664  |
| C | -3.34112 | 0.72039  | 1.08571  |
| C | -2.64527 | -1.88030 | -2.92323 |
| C | -3.69889 | -3.46982 | -1.23971 |
| C | -2.63342 | 1.41618  | 2.24519  |
| C | -3.27698 | 1.03285  | 3.59352  |
| C | -2.59808 | 2.94676  | 2.07296  |
| C | 1.49751  | -3.10947 | -1.32349 |
| C | 1.52356  | -3.32050 | -2.84532 |
| C | 1.82482  | -4.41216 | -0.55679 |
| C | 2.69086  | 0.41665  | 2.16684  |
| C | 3.21424  | -0.41974 | 3.35731  |
| C | 3.23351  | 1.85483  | 2.21765  |
| H | -1.90419 | -1.99270 | 2.44560  |
| H | 1.15404  | -2.75754 | 2.39935  |

---

|   |          |          |          |
|---|----------|----------|----------|
| H | 5.05100  | 0.37150  | 0.80072  |
| H | 5.67276  | -0.98536 | -1.16296 |
| H | 4.05008  | -2.56275 | -2.14825 |
| H | -5.27467 | -1.05813 | -1.79942 |
| H | -6.32260 | 0.81128  | -0.57381 |
| H | -5.11461 | 1.92519  | 1.26692  |
| H | -2.00328 | -1.00375 | -3.05501 |
| H | -3.60093 | -1.68007 | -3.42143 |
| H | -2.17520 | -2.72951 | -3.43247 |
| H | -3.81128 | -3.71849 | -0.17897 |
| H | -4.70146 | -3.35060 | -1.66627 |
| H | -3.22303 | -4.32112 | -1.73956 |
| H | -1.59678 | 1.06487  | 2.27344  |
| H | -3.25930 | -0.05039 | 3.75301  |
| H | -4.32154 | 1.36257  | 3.64044  |
| H | -2.73623 | 1.50580  | 4.42121  |
| H | -2.14556 | 3.23250  | 1.11783  |
| H | -3.60211 | 3.38331  | 2.11327  |
| H | -2.01181 | 3.40041  | 2.88051  |
| H | 0.47292  | -2.82901 | -1.05899 |
| H | 0.76924  | -4.06298 | -3.13046 |
| H | 2.49243  | -3.69692 | -3.19252 |
| H | 1.30765  | -2.39119 | -3.38483 |
| H | 1.07639  | -5.18387 | -0.77649 |
| H | 2.80540  | -4.79636 | -0.86525 |
| H | 1.85698  | -4.23529 | 0.52438  |

---

|   |          |          |          |
|---|----------|----------|----------|
| H | 1.60135  | 0.47124  | 2.26592  |
| H | 2.86514  | -1.45543 | 3.29341  |
| H | 4.31176  | -0.42942 | 3.35930  |
| H | 2.88076  | 0.01963  | 4.30601  |
| H | 2.89004  | 2.34791  | 3.13479  |
| H | 4.32910  | 1.87674  | 2.23328  |
| H | 2.89634  | 2.44815  | 1.36101  |
| C | -0.29485 | -0.52937 | 0.07258  |
| O | -0.24284 | 0.08058  | -1.11764 |
| C | 0.22592  | 1.40063  | -1.26209 |
| C | 0.51287  | 1.79185  | -2.56970 |
| C | 0.35912  | 2.28660  | -0.20470 |
| C | 0.93587  | 3.09046  | -2.81472 |
| H | 0.40327  | 1.07692  | -3.37850 |
| C | 0.78944  | 3.59673  | -0.45181 |
| H | 0.13757  | 1.97721  | 0.81095  |
| C | 1.07780  | 4.00527  | -1.75814 |
| H | 1.16606  | 3.41866  | -3.82309 |
| C | -2.84530 | -2.20043 | -1.42929 |
| H | -1.86012 | -2.41881 | -1.00667 |
| F | 2.03693  | -3.39716 | 2.65575  |
| H | 0.89057  | 4.27837  | 0.38414  |
| O | 1.49851  | 5.25399  | -2.10822 |
| C | 1.66595  | 6.22031  | -1.07808 |
| H | 2.00653  | 7.12998  | -1.57481 |
| H | 2.41992  | 5.90099  | -0.34750 |

H            0.71996        6.42193       -0.55947

E = - 1681.72247367 a.u. (basis set: 6-311++G(d,p))

No imaginary frequencies.

### Uronium bifluoride 4-methoxyphenol

Spin Multiplicity = 1

Charge = 0

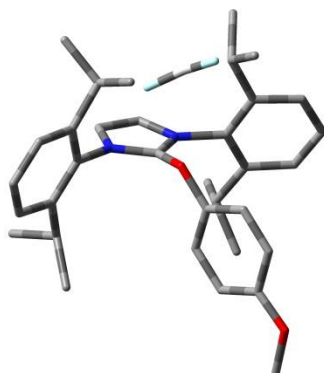

|   |          |          |          |
|---|----------|----------|----------|
| N | -1.57618 | -0.73527 | 0.62414  |
| C | -1.2434  | -1.65460 | 1.61822  |
| C | 0.09572  | -1.87941 | 1.56126  |
| N | 0.58703  | -1.09228 | 0.51795  |
| C | 1.95682  | -1.04169 | 0.02927  |
| C | -2.90934 | -0.24545 | 0.33226  |
| C | 2.91539  | -0.33610 | 0.77972  |
| C | 4.21030  | -0.27333 | 0.25194  |
| C | 4.53067  | -0.89083 | -0.95265 |
| C | 3.56654  | -1.61648 | -1.64458 |
| C | 2.25762  | -1.72387 | -1.16368 |
| C | -3.62492 | -0.83473 | -0.72859 |

---

|   |          |          |          |
|---|----------|----------|----------|
| C | -4.91818 | -0.35544 | -0.96989 |
| C | -5.47524 | 0.64656  | -0.18129 |
| C | -4.74850 | 1.19406  | 0.87211  |
| C | -3.44630 | 0.76514  | 1.15572  |
| C | -2.94011 | -1.53215 | -3.06631 |
| C | -3.90841 | -3.24437 | -1.45233 |
| C | -2.69140 | 1.36860  | 2.33679  |
| C | -3.29511 | 0.89787  | 3.67595  |
| C | -2.64201 | 2.90718  | 2.27123  |
| C | 1.26927  | -2.64470 | -1.87141 |
| C | 1.11353  | -2.32002 | -3.36702 |
| C | 1.67795  | -4.11577 | -1.64141 |
| C | 2.62517  | 0.27625  | 2.14630  |
| C | 3.16169  | -0.64247 | 3.26721  |
| C | 3.18825  | 1.70196  | 2.29576  |
| H | -1.99792 | -2.06193 | 2.27129  |
| H | 0.73241  | -2.52647 | 2.19049  |
| H | 4.98181  | 0.25792  | 0.80006  |
| H | 5.54314  | -0.82561 | -1.34210 |
| H | 3.83978  | -2.13125 | -2.56074 |
| H | -5.49852 | -0.78145 | -1.78272 |
| H | -6.48284 | 0.99849  | -0.38429 |
| H | -5.19921 | 1.96740  | 1.48649  |
| H | -2.31325 | -0.64034 | -3.16518 |
| H | -3.91982 | -1.30900 | -3.50409 |
| H | -2.48705 | -2.33709 | -3.65584 |



---

|   |          |          |          |
|---|----------|----------|----------|
| H | -3.96966 | -3.56976 | -0.40833 |
| H | -4.93028 | -3.09788 | -1.82036 |
| H | -3.45676 | -4.05512 | -2.03480 |
| H | -1.65802 | 1.00690  | 2.30584  |
| H | -3.29228 | -0.19420 | 3.75819  |
| H | -4.33128 | 1.23915  | 3.78255  |
| H | -2.71835 | 1.30192  | 4.51539  |
| H | -2.22091 | 3.25629  | 1.32268  |
| H | -3.63834 | 3.34965  | 2.37906  |
| H | -2.02176 | 3.29585  | 3.08694  |
| H | 0.28391  | -2.51821 | -1.41109 |
| H | 0.36834  | -2.98377 | -3.82093 |
| H | 2.05314  | -2.46183 | -3.91271 |
| H | 0.78685  | -1.28560 | -3.52194 |
| H | 0.89440  | -4.78895 | -2.01124 |
| H | 2.60282  | -4.34923 | -2.18359 |
| H | 1.85713  | -4.29315 | -0.57677 |
| H | 1.53767  | 0.34574  | 2.26910  |
| H | 2.72265  | -1.64521 | 3.23389  |
| H | 4.25147  | -0.73881 | 3.18445  |
| H | 2.93995  | -0.19782 | 4.24615  |
| H | 2.85357  | 2.13345  | 3.24639  |
| H | 4.28382  | 1.70510  | 2.31012  |
| H | 2.85972  | 2.35873  | 1.48334  |
| C | -0.44279 | -0.41173 | -0.02761 |
| H | 2.24899  | -3.62802 | 2.24844  |

|   |          |          |          |
|---|----------|----------|----------|
| O | -0.42980 | 0.31135  | -1.14355 |
| C | 0.18814  | 1.58296  | -1.20551 |
| C | 0.59409  | 1.99541  | -2.47296 |
| C | 0.31930  | 2.40948  | -0.10122 |
| C | 1.14429  | 3.25976  | -2.62922 |
| H | 0.47678  | 1.32862  | -3.32058 |
| C | 0.87965  | 3.68289  | -0.25865 |
| H | -0.00097 | 2.08264  | 0.88226  |
| C | 1.29299  | 4.11456  | -1.52417 |
| H | 1.47131  | 3.60629  | -3.60398 |
| H | 0.98073  | 4.31980  | 0.61165  |
| O | 1.84369  | 5.33109  | -1.78808 |
| C | -3.06602 | -1.96100 | -1.59171 |
| H | -2.06031 | -2.20475 | -1.23627 |
| F | 1.61940  | -3.44106 | 3.29309  |
| F | 2.71077  | -3.62763 | 1.28481  |
| C | 2.03151  | 6.23655  | -0.70600 |
| H | 2.48525  | 7.12853  | -1.13996 |
| H | 2.70428  | 5.81848  | 0.05323  |
| H | 1.07597  | 6.50544  | -0.23835 |

E = - 1782.25002457 a. u. (basis set: 6-311++G(d,p))

No imaginary frequencies.

### Product complex RuCp 4-fluoroanisole PhenoFluor-urea

PhenoFluor-urea = 1,3-bis(2,6-diisopropylphenyl)-1,3-dihydro-2H-imidazol-2-one

Spin Multiplicity = 1

Charge = 1

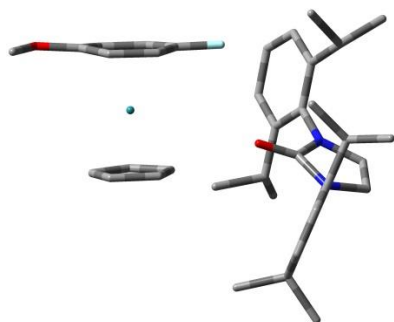

|   |          |          |          |
|---|----------|----------|----------|
| N | -3.24689 | -0.86231 | 0.05937  |
| C | -4.47682 | -0.25450 | 0.34443  |
| C | -4.24867 | 1.06175  | 0.54122  |
| N | -2.87413 | 1.28394  | 0.37914  |
| C | -2.20442 | 2.54887  | 0.49835  |
| C | -3.03863 | -2.25613 | -0.22247 |
| C | -2.12762 | 3.38968  | -0.63183 |
| C | -1.47143 | 4.61914  | -0.48726 |
| C | -0.91217 | 4.99758  | 0.73073  |
| C | -1.00435 | 4.15200  | 1.83417  |
| C | -1.65581 | 2.91498  | 1.74576  |
| C | -2.81894 | -3.14329 | 0.85086  |
| C | -2.62049 | -4.49683 | 0.54809  |
| C | -2.63667 | -4.94915 | -0.76850 |
| C | -2.85554 | -4.05301 | -1.81249 |
| C | -3.06521 | -2.69081 | -1.56460 |
| C | -1.37871 | -2.87273 | 2.91453  |
| C | -3.86044 | -3.37421 | 3.15405  |
| C | -3.27343 | -1.72364 | -2.72620 |
| C | -4.33819 | -2.21344 | -3.72447 |

---

|   |          |          |          |
|---|----------|----------|----------|
| C | -1.93337 | -1.43544 | -3.43467 |
| C | -1.74079 | 2.01064  | 2.97087  |
| C | -0.35872 | 1.42422  | 3.32054  |
| C | -2.36443 | 2.72928  | 4.18218  |
| C | -2.73510 | 3.00976  | -1.97856 |
| C | -3.86943 | 3.97553  | -2.37481 |
| C | -1.66446 | 2.92904  | -3.08396 |
| H | -5.39119 | -0.82545 | 0.37551  |
| H | -4.92319 | 1.86854  | 0.78018  |
| H | -1.40121 | 5.29005  | -1.33886 |
| H | -0.41071 | 5.95746  | 0.82278  |
| H | -0.57261 | 4.46148  | 2.78177  |
| H | -2.4504  | -5.20425 | 1.35480  |
| H | -2.48113 | -6.00330 | -0.98231 |
| H | -2.86622 | -4.41803 | -2.83518 |
| H | -0.61941 | -2.33083 | 2.34143  |
| H | -1.09663 | -3.93224 | 2.93964  |
| H | -1.35981 | -2.49961 | 3.94553  |
| H | -4.86112 | -3.21039 | 2.73899  |
| H | -3.69551 | -4.45631 | 3.21190  |
| H | -3.84844 | -2.98158 | 4.17745  |
| H | -3.63316 | -0.77605 | -2.31286 |
| H | -5.29066 | -2.41924 | -3.22376 |
| H | -4.02655 | -3.12742 | -4.24252 |
| H | -4.51483 | -1.44841 | -4.48927 |
| H | -1.20184 | -1.03537 | -2.72470 |

---

|   |          |          |          |
|---|----------|----------|----------|
| H | -1.52027 | -2.34965 | -3.87843 |
| H | -2.07402 | -0.70410 | -4.23972 |
| H | -2.39616 | 1.16993  | 2.72354  |
| H | -0.43721 | 0.74955  | 4.18146  |
| H | 0.35257  | 2.21801  | 3.58205  |
| H | 0.04866  | 0.85677  | 2.47850  |
| H | -2.48259 | 2.02743  | 5.01574  |
| H | -1.73705 | 3.55602  | 4.53463  |
| H | -3.35166 | 3.13731  | 3.93934  |
| H | -3.17613 | 2.01335  | -1.88156 |
| H | -4.32707 | 3.65800  | -3.31884 |
| H | -3.49726 | 4.99757  | -2.51112 |
| H | -4.65296 | 4.00393  | -1.60951 |
| H | -2.11844 | 2.60694  | -4.02839 |
| H | -1.18996 | 3.90163  | -3.25903 |
| H | -0.87942 | 2.21157  | -2.82090 |
| C | -2.23445 | 0.08749  | 0.07868  |
| F | 1.71095  | -1.10038 | 2.19594  |
| O | -1.02802 | -0.09827 | -0.12545 |
| C | 2.85517  | -1.15128 | 1.51318  |
| C | 2.98366  | -2.05714 | 0.43554  |
| C | 3.89876  | -0.25893 | 1.84615  |
| C | 4.21364  | -2.12087 | -0.26703 |
| H | 2.13850  | -2.67131 | 0.14779  |
| C | 5.13374  | -0.33481 | 1.14406  |
| H | 3.74867  | 0.47154  | 2.63243  |

---

|    |          |          |          |
|----|----------|----------|----------|
| C  | 5.32878  | -1.32619 | 0.13739  |
| H  | 4.33685  | -2.80105 | -1.10151 |
| H  | 5.92691  | 0.35267  | 1.40629  |
| O  | 6.46859  | -1.52804 | -0.53127 |
| C  | -2.78043 | -2.67857 | 2.30294  |
| H  | -2.99511 | -1.60587 | 2.32063  |
| C  | 7.59766  | -0.67927 | -0.27141 |
| H  | 8.38748  | -1.04348 | -0.92667 |
| H  | 7.91622  | -0.76386 | 0.77238  |
| H  | 7.36355  | 0.36231  | -0.51735 |
| Ru | 3.44531  | 0.02863  | -0.36397 |
| C  | 2.58357  | 2.06395  | -0.66694 |
| C  | 1.65481  | 1.08893  | -1.15075 |
| C  | 2.29387  | 0.37665  | -2.21793 |
| C  | 3.61079  | 0.91368  | -2.39440 |
| C  | 3.78891  | 1.95710  | -1.43177 |
| H  | 1.85520  | -0.43090 | -2.78868 |
| H  | 4.34172  | 0.58680  | -3.12192 |
| H  | 4.68060  | 2.55559  | -1.30095 |
| H  | 0.66033  | 0.88931  | -0.76097 |
| H  | 2.40516  | 2.75772  | 0.14379  |

E = -1969.12098190 a.u. (basis set: Ru: LANL2DZ, other atoms: 6-311++G(d,p))

No imaginary frequencies

### Intrinsic reaction coordinates

We were able to localize two transition states by DFT (**TS1** and **TS2**) for the ruthenium-mediated deoxyfluorination reaction. Intrinsic reaction coordinates (IRCs) were generated for both transition states and

**TS1** was shown to interconnect the tetrahedral adduct with the Meisenheimer intermediate while **TS2** interconnects the Meisenheimer intermediate with the reaction products.

### Activation barriers for ruthenium-mediated deoxyfluorination

The following activation barriers were obtained from the single point energies of the tetrahedral adduct and **TS1** (first barrier) and the Meisenheimer intermediate and **TS2** (second barrier), respectively. The values quoted below differ from, and are more accurate than, those quoted in Figure S65 because the values quoted below were obtained with a larger (LANL2DZ (ruthenium), 6-311+G(d,p) (other atoms)) basis set. The energy diagram was obtained by combining the intrinsic reaction coordinates obtained from **TS1** and **TS2**. IRC points were calculated using B3LYP with a split basis set (LANL2DZ for ruthenium and 6-31G(d) for other atoms) and a toluene continuous solvent model.

First barrier: 5.3 kcal·mol<sup>-1</sup>

Second barrier: 7.0 kcal·mol<sup>-1</sup>

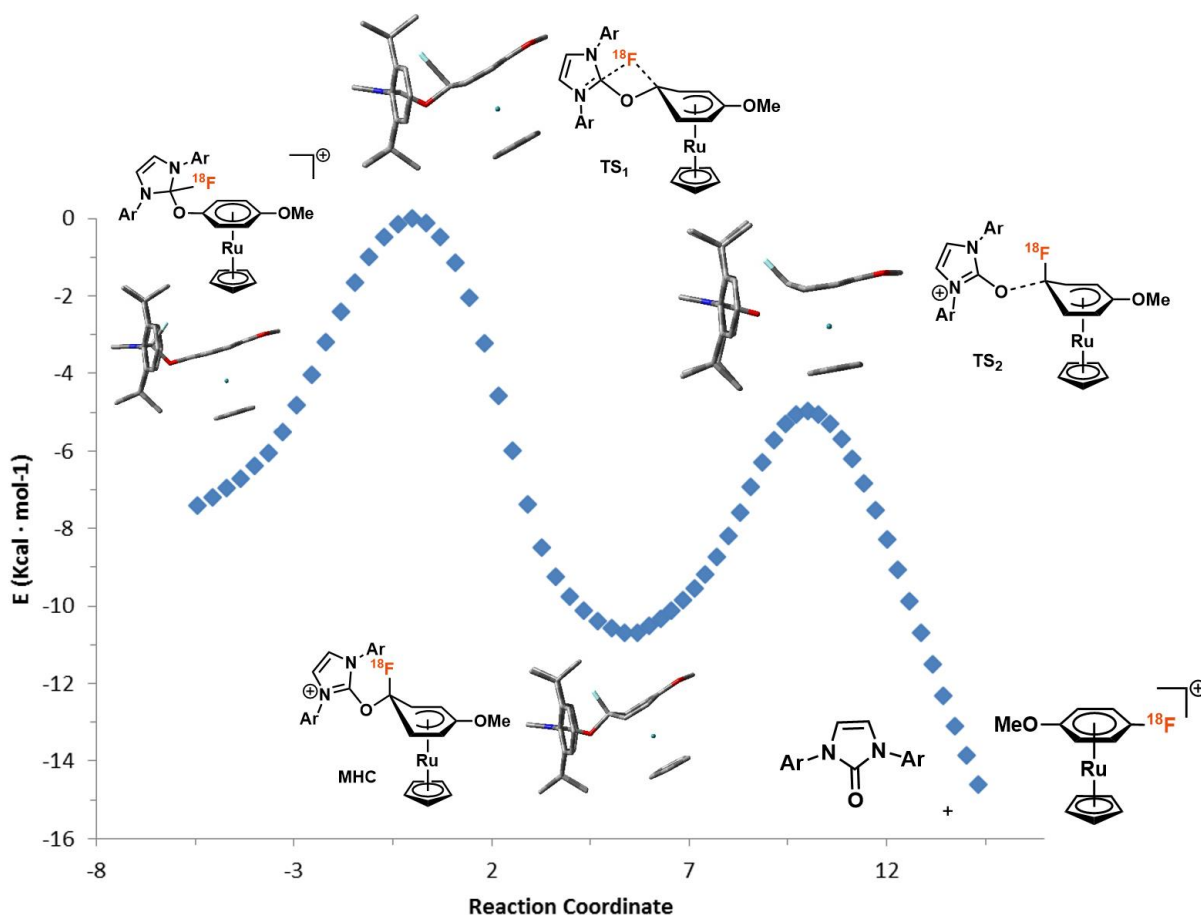

**Figure S65.** Calculated energy diagram for ruthenium-mediated deoxyfluorination.

### Tetrahedral adduct stabilization through ruthenium incorporation

We have established in our earlier work<sup>15</sup> on uronium-mediated deoxyfluorination that an equilibrium exists between a tetrahedral adduct structure and an uronium fluoride structure. <sup>18</sup>F-Deoxyfluorination of electron-rich phenols had not been possible prior to this work because <sup>18</sup>F<sup>-</sup> undergoes unproductive side reactions in the absence of added fluoride salt. Electron-rich phenol substrates decrease the equilibrium constant K and lead to a build-up of uronium fluoride **a**. The basic fluoride is liable to undergo undesirable side reactions and decrease the radiochemical yield.

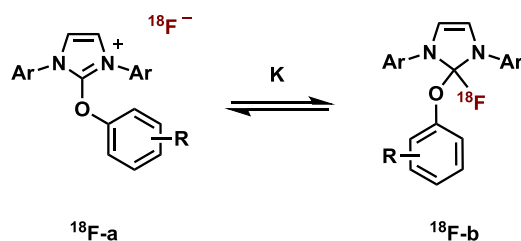

The dynamic equilibrium, which exists between **18F-a** and **18F-b** is affected by the phenol substituent R as well as by complexation of the phenol to RuCp.

In the present work, the presence of RuCp increases the equilibrium constant substantially and ensures the stability of the tetrahedral adduct structure even in the case of highly electron-rich substrates. We have calculated ground state structures for the uronium fluoride and tetrahedral adduct structures in the presence and absence of RuCp to showcase the effect of the introduction of RuCp on the equilibrium position. (Figure S66)



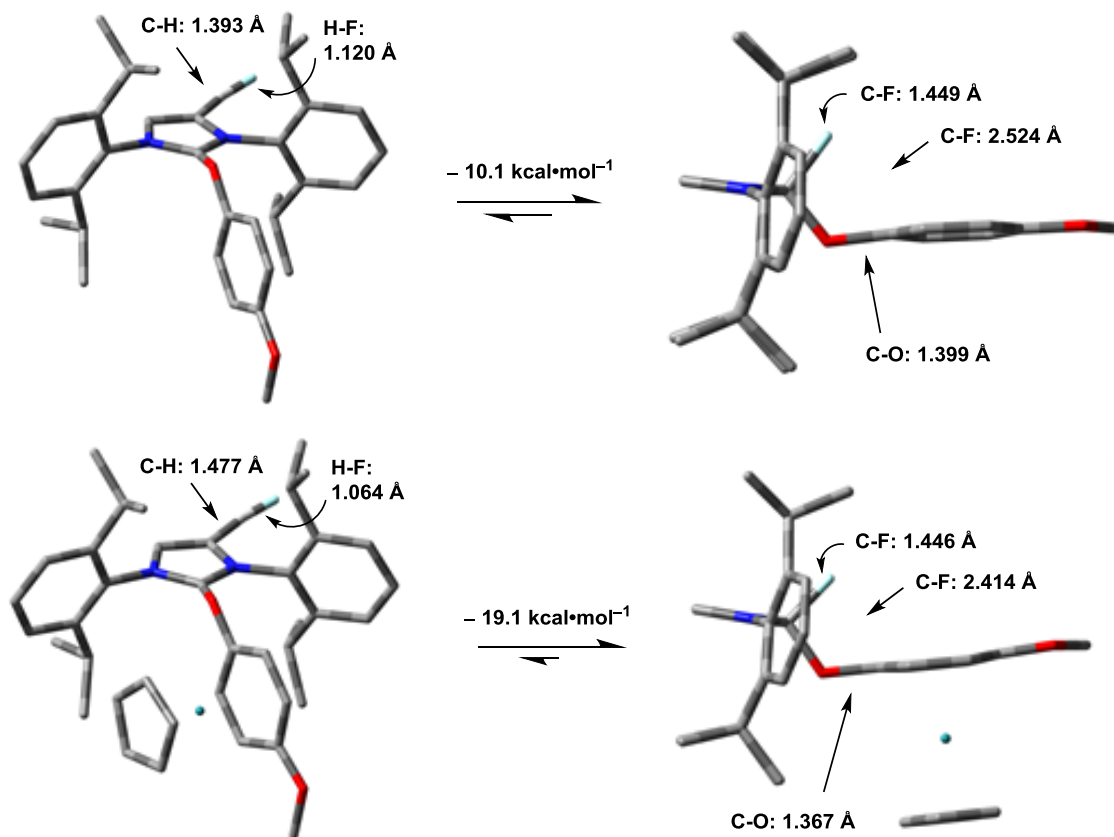

**Figure S66.** Uronium fluoride and tetrahedral adduct optimized structures.

Uronium fluoride and tetrahedral adduct structures were optimized with B3LYP/(LANL2DZ, 6-31G(d)) and a toluene solvent model and single point energies were calculated at B3LYP/(LANL2DZ, 6-311++G(d,p)). A relative stabilization of the tetrahedral adduct over the uronium fluoride structure occurs upon introduction of the RuCp fragment.

Further evidence of the power of the RuCp fragment to ‘localize’ the fluoride (containing) anion close to the imidazolium core comes from the uronium bifluoride structures in the presence and absence of RuCp. We have previously studied the uronium bifluoride structure in detail, both in solution and in the solid state and we have collected a wealth of data supporting that the bifluoride anion is attached *via* a hydrogen bond to the uronium backbone. Complexation to the RuCp fragment leads to a uronium bifluoride structure where bifluoride is located above the imidazolium core, close to its central carbon atom. This arrangement positions the counteranion favorably for formation of the tetrahedral adduct, which corresponds the energy minimum immediately preceding the C–F bond forming transition state. (Figure S67)

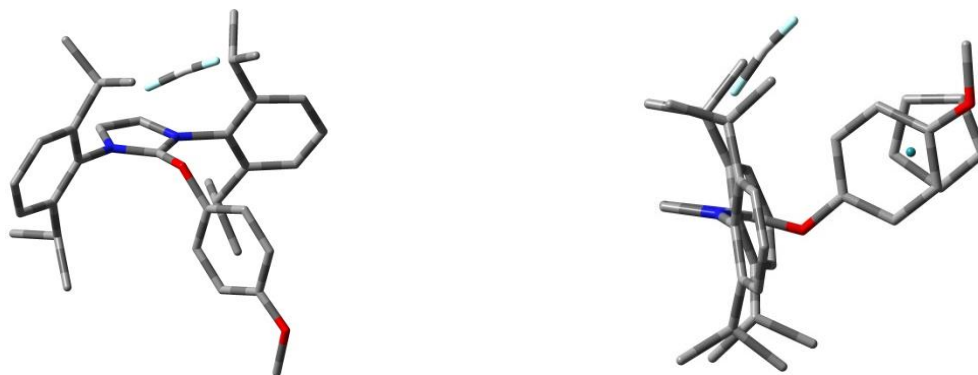

**Figure S67.** The structures of uronium bifluoride (left) and RuCp uronium bifluoride (right) differ in the location of the bifluoride counteranion.

### X-Ray Crystallography

X-ray crystallographic data have been deposited in the Cambridge Crystallographic Data Centre database with accession numbers CCDC 1544015 (**5**) and CCDC 1544723 (**6**).

A crystal mounted on a diffractometer was collected data at 100 K. The intensities of the reflections were collected by means of a Bruker APEX II CCD diffractometer (Mo $K\alpha$  radiation,  $\lambda=0.71073$  Å), and equipped with an Oxford Cryosystems nitrogen flow apparatus. The collection method involved  $0.5^\circ$  scans in  $\omega$  at  $28^\circ$  in  $2\theta$ . Data integration down to  $0.78$  Å resolution was carried out by SAINT V8.37A (Bruker AXS APEX3, Bruker AXS, Madison, Wisconsin, 2016) with reflection spot size optimization. Absorption corrections were made with the program SADABS (Bruker AXS APEX3, Bruker AXS, Madison, Wisconsin, 2016). The structure was solved by the Intrinsic Phasing methods and refined by least-squares methods again  $F^2$  with SHELXT-2014<sup>16</sup> and SHELXL-2014<sup>16</sup> with OLEX 2 interface.<sup>17</sup> Non-hydrogen atoms were refined anisotropically, and hydrogen atoms were allowed to ride on the respective atoms. Crystal data as well as details of data collection and refinement are summarized in Tables S2 and S5 (for compounds **5** and **6** respectively), geometric parameters are shown in Tables S3 and S6 (for compounds **5** and **6** respectively) and hydrogen-bond parameters are listed in Tables S4 and S7 (for compounds **5** and **6** respectively). The Ortep plots produced with SHELXL-2014 program, and the other drawings were produced with Accelrys DS Visualizer 2.0.<sup>18</sup>

**Table S2.** Experimental details.

|                             |                                                     |
|-----------------------------|-----------------------------------------------------|
| Compound Number             | <b>5</b>                                            |
| CCDC Number                 | 1544015                                             |
| Crystal data                |                                                     |
| Chemical formula            | C <sub>16</sub> H <sub>19</sub> Cl <sub>7</sub> ORu |
| $M_r$                       | 576.53                                              |
| Crystal system, space group | Monoclinic, $P2_1/n$                                |
| Temperature (K)             | 100                                                 |
| $a, b, c$ (Å)               | 16.0893 (8), 8.7477 (4), 16.6789 (8)                |
| $\beta$ (°)                 | 110.0404 (7)                                        |
| $V$ (Å <sup>3</sup> )       | 2205.32 (18)                                        |
| $Z$                         | 4                                                   |
| Radiation type              | Mo $K\alpha$                                        |

|                                                                            |                                                                        |
|----------------------------------------------------------------------------|------------------------------------------------------------------------|
| $\mu$ (mm <sup>-1</sup> )                                                  | 1.56                                                                   |
| Crystal size (mm)                                                          | 0.14 × 0.12 × 0.10                                                     |
| Data collection                                                            |                                                                        |
| Diffractometer                                                             | Bruker D8 goniometer with CCD area detector                            |
| Absorption correction                                                      | Multi-scan <i>SADABS</i>                                               |
| $T_{\min}$ , $T_{\max}$                                                    | 0.441, 0.491                                                           |
| No. of measured, independent and observed [ $I > 2\sigma(I)$ ] reflections | 34295, 4883, 4168                                                      |
| $R_{\text{int}}$                                                           | 0.032                                                                  |
| $(\sin \theta/\lambda)_{\text{max}}$ (Å <sup>-1</sup> )                    | 0.642                                                                  |
| Refinement                                                                 |                                                                        |
| $R[F^2 > 2\sigma(F^2)]$ , $wR(F^2)$ , $S$                                  | 0.041, 0.093, 1.02                                                     |
| No. of reflections                                                         | 4883                                                                   |
| No. of parameters                                                          | 289                                                                    |
| No. of restraints                                                          | 271                                                                    |
| H-atom treatment                                                           | H atoms treated by a mixture of independent and constrained refinement |
| $\Delta\rho_{\text{max}}$ , $\Delta\rho_{\text{min}}$ (e Å <sup>-3</sup> ) | 1.45, -1.05                                                            |

Computer programs: *APEX3* v2016.1-0 (Bruker-AXS, 2016), *SAINT* 8.35A (Bruker-AXS, 2015), *SHELXT2014* (Sheldrick, 2015), *SHELXL2014* (Sheldrick, 2015), Bruker *SHELXTL* (Sheldrick, 2015).

**Table S3.** Geometric parameters (Å, °).

|          |           |         |            |
|----------|-----------|---------|------------|
| Ru1—C12A | 2.15 (3)  | C12—H12 | 0.9500     |
| Ru1—C14A | 2.16 (3)  | C13—C14 | 1.426 (10) |
| Ru1—C11  | 2.166 (5) | C13—H13 | 0.9500     |
| Ru1—C13A | 2.17 (4)  | C14—C15 | 1.411 (9)  |
| Ru1—C15  | 2.171 (5) | C14—H14 | 0.9500     |

|          |           |                        |            |
|----------|-----------|------------------------|------------|
| Ru1—C12  | 2.173 (5) | C15—H15                | 0.9500     |
| Ru1—C14  | 2.174 (5) | C11A—C15A              | 1.34 (5)   |
| Ru1—C13  | 2.182 (5) | C11A—C12A              | 1.35 (5)   |
| Ru1—C15A | 2.18 (3)  | C11A—H11A              | 0.9500     |
| Ru1—C11A | 2.18 (3)  | C12A—C13A              | 1.32 (6)   |
| Ru1—C3   | 2.203 (3) | C12A—H12A              | 0.9500     |
| Ru1—C2   | 2.206 (3) | C13A—C14A              | 1.36 (5)   |
| O1—C1    | 1.345 (4) | C13A—H13A              | 0.9500     |
| O1—H1    | 0.80 (5)  | C14A—C15A              | 1.35 (5)   |
| C1—C6    | 1.411 (5) | C14A—H14A              | 0.9500     |
| C1—C2    | 1.414 (5) | C15A—H15A              | 0.9500     |
| C2—C3    | 1.415 (5) | C21—Cl4                | 1.738 (5)  |
| C2—H2    | 0.9500    | C21—Cl3                | 1.749 (5)  |
| C3—C4    | 1.426 (5) | C21—Cl2                | 1.754 (5)  |
| C3—C7    | 1.510 (5) | C21—H21                | 1.0000     |
| C4—C5    | 1.429 (5) | C21A—Cl3A              | 1.750 (16) |
| C4—C8    | 1.503 (5) | C21A—Cl2A              | 1.757 (15) |
| C5—C6    | 1.418 (5) | C21A—Cl4A              | 1.763 (16) |
| C5—C9    | 1.496 (5) | C21A—H21A              | 1.0000     |
| C6—H6    | 0.9500    | Cl3A—Cl7A <sup>i</sup> | 2.378 (16) |
| C7—H7A   | 0.9800    | C22—Cl5                | 1.754 (6)  |
| C7—H7B   | 0.9800    | C22—Cl6                | 1.758 (7)  |
| C7—H7C   | 0.9800    | C22—Cl7                | 1.787 (7)  |
| C8—H8A   | 0.9800    | C22—H22                | 1.0000     |
| C8—H8B   | 0.9800    | C22A—Cl6A              | 1.761 (15) |
| C8—H8C   | 0.9800    | C22A—Cl5A              | 1.764 (15) |
| C9—H9A   | 0.9800    | C22A—Cl7A              | 1.772 (15) |

|               |            |                        |            |
|---------------|------------|------------------------|------------|
| C9—H9B        | 0.9800     | C22A—H22A              | 1.0000     |
| C9—H9C        | 0.9800     | C17A—C13A <sup>i</sup> | 2.378 (16) |
| C11—C15       | 1.418 (9)  | C22B—C17B              | 1.751 (16) |
| C11—C12       | 1.424 (8)  | C22B—C16B              | 1.751 (16) |
| C11—H11       | 0.9500     | C22B—C15B              | 1.761 (15) |
| C12—C13       | 1.422 (9)  | C22B—H22B              | 1.0000     |
| C12A—Ru1—C14A | 60.4 (15)  | H9A—C9—H9C             | 109.5      |
| C12A—Ru1—C13A | 35.7 (15)  | H9B—C9—H9C             | 109.5      |
| C14A—Ru1—C13A | 36.5 (14)  | C15—C11—C12            | 107.8 (5)  |
| C11—Ru1—C15   | 38.2 (2)   | C15—C11—Ru1            | 71.1 (3)   |
| C11—Ru1—C12   | 38.3 (2)   | C12—C11—Ru1            | 71.1 (3)   |
| C15—Ru1—C12   | 63.8 (2)   | C15—C11—H11            | 126.1      |
| C11—Ru1—C14   | 63.8 (2)   | C12—C11—H11            | 126.1      |
| C15—Ru1—C14   | 37.9 (2)   | Ru1—C11—H11            | 123.3      |
| C12—Ru1—C14   | 63.8 (2)   | C13—C12—C11            | 108.1 (5)  |
| C11—Ru1—C13   | 64.0 (2)   | C13—C12—Ru1            | 71.3 (3)   |
| C15—Ru1—C13   | 63.8 (2)   | C11—C12—Ru1            | 70.6 (3)   |
| C12—Ru1—C13   | 38.1 (2)   | C13—C12—H12            | 126.0      |
| C14—Ru1—C13   | 38.2 (3)   | C11—C12—H12            | 126.0      |
| C12A—Ru1—C15A | 59.6 (15)  | Ru1—C12—H12            | 123.8      |
| C14A—Ru1—C15A | 36.1 (13)  | C12—C13—C14            | 107.5 (5)  |
| C13A—Ru1—C15A | 59.8 (14)  | C12—C13—Ru1            | 70.6 (3)   |
| C12A—Ru1—C11A | 36.3 (13)  | C14—C13—Ru1            | 70.6 (3)   |
| C14A—Ru1—C11A | 60.7 (13)  | C12—C13—H13            | 126.2      |
| C13A—Ru1—C11A | 60.3 (15)  | C14—C13—H13            | 126.2      |
| C15A—Ru1—C11A | 35.8 (13)  | Ru1—C13—H13            | 124.2      |
| C12A—Ru1—C3   | 150.4 (17) | C15—C14—C13            | 108.3 (5)  |

|             |             |                |           |
|-------------|-------------|----------------|-----------|
| C14A—Ru1—C3 | 108.6 (10)  | C15—C14—Ru1    | 71.0 (3)  |
| C11—Ru1—C3  | 145.5 (3)   | C13—C14—Ru1    | 71.2 (3)  |
| C13A—Ru1—C3 | 118.5 (16)  | C15—C14—H14    | 125.9     |
| C15—Ru1—C3  | 114.2 (2)   | C13—C14—H14    | 125.9     |
| C12—Ru1—C3  | 169.9 (3)   | Ru1—C14—H14    | 123.6     |
| C14—Ru1—C3  | 108.2 (2)   | C14—C15—C11    | 108.3 (5) |
| C13—Ru1—C3  | 131.8 (3)   | C14—C15—Ru1    | 71.1 (3)  |
| C15A—Ru1—C3 | 129.3 (13)  | C11—C15—Ru1    | 70.7 (3)  |
| C11A—Ru1—C3 | 164.9 (16)  | C14—C15—H15    | 125.9     |
| C12A—Ru1—C2 | 169.3 (15)  | C11—C15—H15    | 125.9     |
| C14A—Ru1—C2 | 113.4 (14)  | Ru1—C15—H15    | 123.9     |
| C11—Ru1—C2  | 117.5 (3)   | C15A—C11A—C12A | 106 (3)   |
| C13A—Ru1—C2 | 143.7 (18)  | C15A—C11A—Ru1  | 72 (2)    |
| C15—Ru1—C2  | 106.42 (18) | C12A—C11A—Ru1  | 70.5 (18) |
| C12—Ru1—C2  | 152.0 (3)   | C15A—C11A—H11A | 126.9     |
| C14—Ru1—C2  | 125.9 (3)   | C12A—C11A—H11A | 126.9     |
| C13—Ru1—C2  | 163.4 (4)   | Ru1—C11A—H11A  | 122.2     |
| C15A—Ru1—C2 | 110.1 (9)   | C13A—C12A—C11A | 110 (3)   |
| C11A—Ru1—C2 | 133.7 (13)  | C13A—C12A—Ru1  | 73 (2)    |
| C3—Ru1—C2   | 37.45 (13)  | C11A—C12A—Ru1  | 73 (2)    |
| C1—O1—H1    | 113 (3)     | C13A—C12A—H12A | 125.2     |
| O1—C1—C6    | 118.4 (3)   | C11A—C12A—H12A | 125.2     |
| O1—C1—C2    | 122.5 (3)   | Ru1—C12A—H12A  | 120.4     |
| C6—C1—C2    | 118.9 (3)   | C12A—C13A—C14A | 108 (3)   |
| O1—C1—Ru1   | 131.2 (2)   | C12A—C13A—Ru1  | 71 (2)    |
| C6—C1—Ru1   | 69.51 (19)  | C14A—C13A—Ru1  | 72 (2)    |
| C2—C1—Ru1   | 69.18 (19)  | C12A—C13A—H13A | 126.0     |

|           |            |                             |            |
|-----------|------------|-----------------------------|------------|
| C1—C2—C3  | 120.9 (3)  | C14A—C13A—H13A              | 126.0      |
| C1—C2—Ru1 | 73.99 (19) | Ru1—C13A—H13A               | 122.7      |
| C3—C2—Ru1 | 71.18 (19) | C15A—C14A—C13A              | 107 (3)    |
| C1—C2—H2  | 119.6      | C15A—C14A—Ru1               | 73 (2)     |
| C3—C2—H2  | 119.6      | C13A—C14A—Ru1               | 72 (2)     |
| Ru1—C2—H2 | 127.3      | C15A—C14A—H14A              | 126.7      |
| C2—C3—C4  | 120.0 (3)  | C13A—C14A—H14A              | 126.7      |
| C2—C3—C7  | 118.3 (3)  | Ru1—C14A—H14A               | 120.6      |
| C4—C3—C7  | 121.7 (3)  | C11A—C15A—C14A              | 110 (3)    |
| C2—C3—Ru1 | 71.37 (19) | C11A—C15A—Ru1               | 72.1 (19)  |
| C4—C3—Ru1 | 72.59 (19) | C14A—C15A—Ru1               | 71 (2)     |
| C7—C3—Ru1 | 128.3 (3)  | C11A—C15A—H15A              | 125.2      |
| C3—C4—C5  | 119.2 (3)  | C14A—C15A—H15A              | 125.2      |
| C3—C4—C8  | 121.7 (3)  | Ru1—C15A—H15A               | 123.0      |
| C5—C4—C8  | 119.2 (3)  | Cl4—C21—Cl3                 | 110.2 (3)  |
| C3—C4—Ru1 | 69.96 (19) | Cl4—C21—Cl2                 | 110.7 (3)  |
| C5—C4—Ru1 | 70.90 (19) | Cl3—C21—Cl2                 | 110.6 (3)  |
| C8—C4—Ru1 | 131.5 (2)  | Cl4—C21—H21                 | 108.4      |
| C6—C5—C4  | 119.7 (3)  | Cl3—C21—H21                 | 108.4      |
| C6—C5—C9  | 119.5 (3)  | Cl2—C21—H21                 | 108.4      |
| C4—C5—C9  | 120.8 (3)  | Cl3A—C21A—Cl2A              | 107.7 (11) |
| C6—C5—Ru1 | 70.85 (19) | Cl3A—C21A—Cl4A              | 110.4 (11) |
| C4—C5—Ru1 | 71.76 (19) | Cl2A—C21A—Cl4A              | 110.6 (11) |
| C9—C5—Ru1 | 130.3 (2)  | Cl3A—C21A—H21A              | 109.4      |
| C1—C6—C5  | 121.0 (3)  | Cl2A—C21A—H21A              | 109.4      |
| C1—C6—Ru1 | 73.79 (19) | Cl4A—C21A—H21A              | 109.4      |
| C5—C6—Ru1 | 71.90 (19) | C21A—Cl3A—Cl7A <sup>i</sup> | 170.3 (8)  |



|              |            |                             |            |
|--------------|------------|-----------------------------|------------|
| C1—C6—H6     | 119.5      | Cl5—C22—Cl6                 | 111.3 (4)  |
| C5—C6—H6     | 119.5      | Cl5—C22—Cl7                 | 108.3 (4)  |
| Ru1—C6—H6    | 126.8      | Cl6—C22—Cl7                 | 110.7 (4)  |
| C3—C7—H7A    | 109.5      | Cl5—C22—H22                 | 108.8      |
| C3—C7—H7B    | 109.5      | Cl6—C22—H22                 | 108.8      |
| H7A—C7—H7B   | 109.5      | Cl7—C22—H22                 | 108.8      |
| C3—C7—H7C    | 109.5      | Cl6A—C22A—Cl5A              | 107.8 (11) |
| H7A—C7—H7C   | 109.5      | Cl6A—C22A—Cl7A              | 105.9 (10) |
| H7B—C7—H7C   | 109.5      | Cl5A—C22A—Cl7A              | 110.9 (12) |
| C4—C8—H8A    | 109.5      | Cl6A—C22A—H22A              | 110.7      |
| C4—C8—H8B    | 109.5      | Cl5A—C22A—H22A              | 110.7      |
| H8A—C8—H8B   | 109.5      | Cl7A—C22A—H22A              | 110.7      |
| C4—C8—H8C    | 109.5      | C22A—Cl7A—Cl3A <sup>i</sup> | 168.9 (9)  |
| H8A—C8—H8C   | 109.5      | Cl7B—C22B—Cl6B              | 112.6 (13) |
| H8B—C8—H8C   | 109.5      | Cl7B—C22B—Cl5B              | 111.2 (12) |
| C5—C9—H9A    | 109.5      | Cl6B—C22B—Cl5B              | 108.6 (11) |
| C5—C9—H9B    | 109.5      | Cl7B—C22B—H22B              | 108.1      |
| H9A—C9—H9B   | 109.5      | Cl6B—C22B—H22B              | 108.1      |
| C5—C9—H9C    | 109.5      | Cl5B—C22B—H22B              | 108.1      |
| O1—C1—C2—C3  | 177.9 (3)  | C4—C5—C6—Ru1                | 54.6 (3)   |
| C6—C1—C2—C3  | -5.4 (5)   | C9—C5—C6—Ru1                | -126.2 (3) |
| Ru1—C1—C2—C3 | -55.8 (3)  | C15—C11—C12—C13             | 0.3 (5)    |
| O1—C1—C2—Ru1 | -126.3 (3) | Ru1—C11—C12—C13             | -61.7 (3)  |
| C6—C1—C2—Ru1 | 50.3 (3)   | C15—C11—C12—Ru1             | 62.0 (3)   |
| C1—C2—C3—C4  | 1.1 (5)    | C11—C12—C13—C14             | 0.0 (5)    |
| Ru1—C2—C3—C4 | -56.0 (3)  | Ru1—C12—C13—C14             | -61.3 (3)  |
| C1—C2—C3—C7  | -178.7 (3) | C11—C12—C13—Ru1             | 61.3 (3)   |

|              |            |                         |           |
|--------------|------------|-------------------------|-----------|
| Ru1—C2—C3—C7 | 124.2 (3)  | C12—C13—C14—C15         | -0.3 (6)  |
| C1—C2—C3—Ru1 | 57.1 (3)   | Ru1—C13—C14—C15         | -61.6 (4) |
| C2—C3—C4—C5  | 2.5 (5)    | C12—C13—C14—Ru1         | 61.3 (3)  |
| C7—C3—C4—C5  | -177.7 (3) | C13—C14—C15—C11         | 0.5 (6)   |
| Ru1—C3—C4—C5 | -53.0 (3)  | Ru1—C14—C15—C11         | -61.3 (4) |
| C2—C3—C4—C8  | -177.4 (3) | C13—C14—C15—Ru1         | 61.8 (4)  |
| C7—C3—C4—C8  | 2.4 (5)    | C12—C11—C15—C14         | -0.4 (6)  |
| Ru1—C3—C4—C8 | 127.1 (3)  | Ru1—C11—C15—C14         | 61.6 (4)  |
| C2—C3—C4—Ru1 | 55.4 (3)   | C12—C11—C15—Ru1         | -62.0 (3) |
| C7—C3—C4—Ru1 | -124.8 (3) | C15A—C11A—C12A—<br>C13A | -1 (4)    |
| C3—C4—C5—C6  | -1.6 (5)   | Ru1—C11A—C12A—C13A      | -64 (3)   |
| C8—C4—C5—C6  | 178.3 (3)  | C15A—C11A—C12A—Ru1      | 64 (2)    |
| Ru1—C4—C5—C6 | -54.2 (3)  | C11A—C12A—C13A—<br>C14A | 2 (4)     |
| C3—C4—C5—C9  | 179.2 (3)  | Ru1—C12A—C13A—C14A      | -63 (3)   |
| C8—C4—C5—C9  | -1.0 (5)   | C11A—C12A—C13A—Ru1      | 65 (2)    |
| Ru1—C4—C5—C9 | 126.6 (3)  | C12A—C13A—C14A—<br>C15A | -2 (4)    |
| C3—C4—C5—Ru1 | 52.5 (3)   | Ru1—C13A—C14A—C15A      | -65 (3)   |
| C8—C4—C5—Ru1 | -127.6 (3) | C12A—C13A—C14A—Ru1      | 62 (3)    |
| O1—C1—C6—C5  | -176.9 (3) | C12A—C11A—C15A—<br>C14A | -1 (4)    |
| C2—C1—C6—C5  | 6.3 (5)    | Ru1—C11A—C15A—C14A      | 62 (3)    |
| Ru1—C1—C6—C5 | 56.5 (3)   | C12A—C11A—C15A—Ru1      | -63 (2)   |
| O1—C1—C6—Ru1 | 126.6 (3)  | C13A—C14A—C15A—<br>C11A | 2 (4)     |
| C2—C1—C6—Ru1 | -50.2 (3)  | Ru1—C14A—C15A—C11A      | -62 (3)   |
| C4—C5—C6—C1  | -2.8 (5)   | C13A—C14A—C15A—Ru1      | 64 (3)    |

|              |           |                                  |          |
|--------------|-----------|----------------------------------|----------|
| C9—C5—C6—C1  | 176.5 (3) | Cl6A—C22A—Cl7A—Cl3A <sup>i</sup> | 128 (4)  |
| Ru1—C5—C6—C1 | -57.4 (3) | Cl5A—C22A—Cl7A—Cl3A <sup>i</sup> | -115 (4) |

Symmetry code(s): (i)  $-x+1, -y+1, -z+2$ .

**Table S4.** Hydrogen-bond parameters.

| $D-H\cdots A$      | $D-H$ (Å) | $H\cdots A$ (Å) | $D\cdots A$ (Å) | $D-H\cdots A$ (°) |
|--------------------|-----------|-----------------|-----------------|-------------------|
| O1—H1 $\cdots$ Cl1 | 0.80 (5)  | 2.20 (5)        | 3.003 (3)       | 175 (5)           |

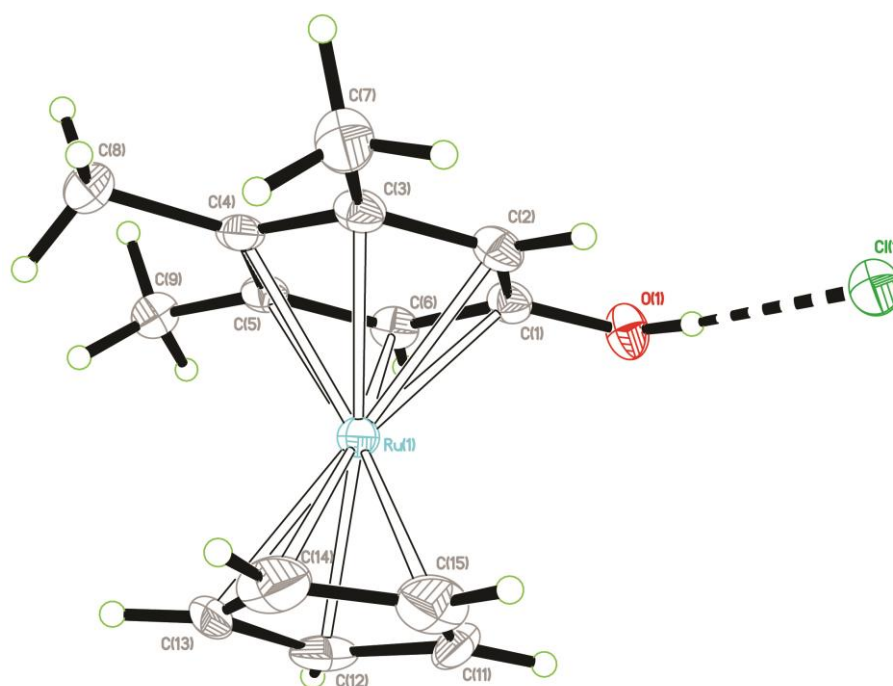

**Figure S68.** Perspective view of **5** showing 50% probability displacement.

**Table S5.** Experimental details

|                             |                              |
|-----------------------------|------------------------------|
| Compound Number             | <b>6</b>                     |
| CCDC Number                 | 1544723                      |
| Crystal data                |                              |
| Chemical formula            | $C_{28}H_{36}Cl_2F_2O_2Ru_2$ |
| $M_r$                       | 715.61                       |
| Crystal system, space group | Tetragonal, $P4_12_12$       |

|                                                                                                                |                                                                        |
|----------------------------------------------------------------------------------------------------------------|------------------------------------------------------------------------|
| Temperature (K)                                                                                                | 100                                                                    |
| <i>a</i> , <i>c</i> (Å)                                                                                        | 14.7499 (9), 25.5756 (16)                                              |
| <i>V</i> (Å <sup>3</sup> )                                                                                     | 5564.2 (8)                                                             |
| <i>Z</i>                                                                                                       | 8                                                                      |
| Radiation type                                                                                                 | Mo <i>K</i> α                                                          |
| μ (mm <sup>-1</sup> )                                                                                          | 1.32                                                                   |
| Crystal size (mm)                                                                                              | 0.12 × 0.10 × 0.06                                                     |
| Data collection                                                                                                |                                                                        |
| Diffractometer                                                                                                 | Bruker D8 goniometer with CCD area detector                            |
| Absorption correction                                                                                          | Multi-scan <i>SADABS</i>                                               |
| <i>T</i> <sub>min</sub> , <i>T</i> <sub>max</sub>                                                              | 0.698, 0.746                                                           |
| No. of measured, independent and observed [ <i>I</i> > 2σ( <i>I</i> )] reflections                             | 88879, 6650, 6357                                                      |
| <i>R</i> <sub>int</sub>                                                                                        | 0.039                                                                  |
| (sin θ/λ) <sub>max</sub> (Å <sup>-1</sup> )                                                                    | 0.658                                                                  |
| Refinement                                                                                                     |                                                                        |
| <i>R</i> [ <i>F</i> <sup>2</sup> > 2σ( <i>F</i> <sup>2</sup> )], <i>wR</i> ( <i>F</i> <sup>2</sup> ), <i>S</i> | 0.017, 0.041, 1.04                                                     |
| No. of reflections                                                                                             | 6650                                                                   |
| No. of parameters                                                                                              | 349                                                                    |
| H-atom treatment                                                                                               | H atoms treated by a mixture of independent and constrained refinement |
| Δρ <sub>max</sub> , Δρ <sub>min</sub> (e Å <sup>-3</sup> )                                                     | 0.76, -0.30                                                            |
| Absolute structure                                                                                             | Refined as an inversion twin.                                          |
| Absolute structure parameter                                                                                   | 0.44 (3)                                                               |

Computer programs: *APEX3* v2016.9-0 (Bruker-AXS, 2016), *SAINT* 8.37A (Bruker-AXS, 2015), *SHELXT2014* (Sheldrick, 2015), *SHELXL2014* (Sheldrick, 2015), Bruker *SHELXTL* (Sheldrick, 2015).

**Table S6. Geometric parameters (Å, °)**

|         |           |         |           |
|---------|-----------|---------|-----------|
| Ru1—C4  | 2.168 (3) | Ru2—C22 | 2.176 (3) |
| Ru1—C3  | 2.170 (3) | Ru2—C25 | 2.176 (3) |
| Ru1—C1  | 2.176 (3) | Ru2—C23 | 2.179 (3) |
| Ru1—C2  | 2.179 (3) | Ru2—C26 | 2.185 (3) |
| Ru1—C5  | 2.182 (3) | Ru2—C29 | 2.206 (3) |
| Ru1—C6  | 2.193 (2) | Ru2—C31 | 2.209 (3) |
| Ru1—C7  | 2.210 (3) | Ru2—C27 | 2.210 (3) |
| Ru1—C8  | 2.213 (3) | Ru2—C30 | 2.218 (3) |
| Ru1—C9  | 2.216 (2) | Ru2—C28 | 2.219 (3) |
| Ru1—C11 | 2.222 (3) | F2—C26  | 1.351 (3) |
| Ru1—C10 | 2.223 (3) | C21—C22 | 1.416 (5) |
| F1—C6   | 1.354 (3) | C21—C25 | 1.420 (5) |
| C1—C2   | 1.418 (4) | C21—H21 | 0.9500    |
| C1—C5   | 1.419 (4) | C22—C23 | 1.411 (5) |
| C1—H1   | 0.9500    | C22—H22 | 0.9500    |
| C2—C3   | 1.422 (4) | C23—C24 | 1.418 (4) |
| C2—H2   | 0.9500    | C23—H23 | 0.9500    |
| C3—C4   | 1.426 (4) | C24—C25 | 1.407 (4) |
| C3—H3   | 0.9500    | C24—H24 | 0.9500    |
| C4—C5   | 1.414 (5) | C25—H25 | 0.9500    |
| C4—H4   | 0.9500    | C26—C31 | 1.394 (4) |
| C5—H5   | 0.9500    | C26—C27 | 1.403 (4) |
| C6—C11  | 1.397 (4) | C27—C28 | 1.420 (4) |
| C6—C7   | 1.399 (4) | C27—H27 | 0.9500    |
| C7—C8   | 1.426 (4) | C28—C29 | 1.429 (4) |
| C7—H7   | 0.9500    | C28—C32 | 1.499 (4) |
| C8—C9   | 1.430 (4) | C29—C30 | 1.437 (4) |

|           |            |             |             |
|-----------|------------|-------------|-------------|
| C8—C12    | 1.497 (4)  | C29—C33     | 1.513 (4)   |
| C9—C10    | 1.427 (4)  | C30—C31     | 1.421 (4)   |
| C9—C13    | 1.509 (3)  | C30—C34     | 1.504 (4)   |
| C10—C11   | 1.421 (4)  | C31—H31     | 0.9500      |
| C10—C14   | 1.501 (4)  | C32—H32A    | 0.9800      |
| C11—H11   | 0.9500     | C32—H32B    | 0.9800      |
| C12—H12A  | 0.9800     | C32—H32C    | 0.9800      |
| C12—H12B  | 0.9800     | C33—H33A    | 0.9800      |
| C12—H12C  | 0.9800     | C33—H33B    | 0.9800      |
| C13—H13A  | 0.9800     | C33—H33C    | 0.9800      |
| C13—H13B  | 0.9800     | C34—H34A    | 0.9800      |
| C13—H13C  | 0.9800     | C34—H34B    | 0.9800      |
| C14—H14A  | 0.9800     | C34—H34C    | 0.9800      |
| C14—H14B  | 0.9800     | O1W—H1WA    | 0.85 (4)    |
| C14—H14C  | 0.9800     | O1W—H1WB    | 0.77 (4)    |
| Ru2—C21   | 2.172 (3)  | O2W—H2WA    | 0.78 (5)    |
| Ru2—C24   | 2.173 (3)  | O2W—H2WB    | 0.83 (5)    |
| C4—Ru1—C3 | 38.38 (12) | C21—Ru2—C22 | 38.01 (13)  |
| C4—Ru1—C1 | 63.77 (11) | C24—Ru2—C22 | 63.41 (12)  |
| C3—Ru1—C1 | 63.83 (11) | C21—Ru2—C25 | 38.11 (12)  |
| C4—Ru1—C2 | 63.90 (11) | C24—Ru2—C25 | 37.75 (12)  |
| C3—Ru1—C2 | 38.18 (11) | C22—Ru2—C25 | 63.68 (12)  |
| C1—Ru1—C2 | 38.01 (11) | C21—Ru2—C23 | 63.41 (12)  |
| C4—Ru1—C5 | 37.93 (12) | C24—Ru2—C23 | 38.04 (11)  |
| C3—Ru1—C5 | 63.72 (12) | C22—Ru2—C23 | 37.81 (13)  |
| C1—Ru1—C5 | 37.99 (11) | C25—Ru2—C23 | 63.55 (12)  |
| C2—Ru1—C5 | 63.54 (11) | C21—Ru2—C26 | 108.82 (11) |

|            |             |             |             |
|------------|-------------|-------------|-------------|
| C4—Ru1—C6  | 165.45 (12) | C24—Ru2—C26 | 159.59 (11) |
| C3—Ru1—C6  | 152.93 (11) | C22—Ru2—C26 | 123.24 (12) |
| C1—Ru1—C6  | 109.95 (10) | C25—Ru2—C26 | 124.30 (12) |
| C2—Ru1—C6  | 120.17 (10) | C23—Ru2—C26 | 158.06 (12) |
| C5—Ru1—C6  | 129.05 (11) | C21—Ru2—C29 | 171.51 (11) |
| C4—Ru1—C7  | 157.51 (12) | C24—Ru2—C29 | 108.31 (11) |
| C3—Ru1—C7  | 121.62 (11) | C22—Ru2—C29 | 138.40 (12) |
| C1—Ru1—C7  | 122.80 (11) | C25—Ru2—C29 | 135.83 (12) |
| C2—Ru1—C7  | 106.90 (11) | C23—Ru2—C29 | 109.33 (11) |
| C5—Ru1—C7  | 158.82 (11) | C26—Ru2—C29 | 79.55 (10)  |
| C6—Ru1—C7  | 37.04 (10)  | C21—Ru2—C31 | 117.72 (11) |
| C4—Ru1—C8  | 125.38 (11) | C24—Ru2—C31 | 127.40 (11) |
| C3—Ru1—C8  | 104.86 (11) | C22—Ru2—C31 | 151.32 (12) |
| C1—Ru1—C8  | 150.60 (10) | C25—Ru2—C31 | 107.28 (11) |
| C2—Ru1—C8  | 116.16 (10) | C23—Ru2—C31 | 164.85 (11) |
| C5—Ru1—C8  | 163.01 (11) | C26—Ru2—C31 | 36.99 (10)  |
| C6—Ru1—C8  | 66.93 (10)  | C29—Ru2—C31 | 67.99 (10)  |
| C7—Ru1—C8  | 37.60 (10)  | C21—Ru2—C27 | 119.64 (12) |
| C4—Ru1—C9  | 106.24 (10) | C24—Ru2—C27 | 163.17 (11) |
| C3—Ru1—C9  | 111.00 (11) | C22—Ru2—C27 | 107.82 (11) |
| C1—Ru1—C9  | 169.42 (10) | C25—Ru2—C27 | 153.79 (12) |
| C2—Ru1—C9  | 142.64 (11) | C23—Ru2—C27 | 126.26 (11) |
| C5—Ru1—C9  | 131.82 (10) | C26—Ru2—C27 | 37.22 (10)  |
| C6—Ru1—C9  | 78.90 (9)   | C29—Ru2—C27 | 67.84 (10)  |
| C7—Ru1—C9  | 67.74 (10)  | C31—Ru2—C27 | 67.50 (10)  |
| C8—Ru1—C9  | 37.66 (10)  | C21—Ru2—C30 | 143.44 (12) |
| C4—Ru1—C11 | 131.91 (11) | C24—Ru2—C30 | 107.25 (11) |

|             |             |             |             |
|-------------|-------------|-------------|-------------|
| C3—Ru1—C11  | 170.13 (11) | C22—Ru2—C30 | 169.79 (12) |
| C1—Ru1—C11  | 115.98 (11) | C25—Ru2—C30 | 112.01 (11) |
| C2—Ru1—C11  | 147.21 (11) | C23—Ru2—C30 | 132.18 (12) |
| C5—Ru1—C11  | 109.57 (11) | C26—Ru2—C30 | 66.96 (10)  |
| C6—Ru1—C11  | 36.90 (10)  | C29—Ru2—C30 | 37.91 (10)  |
| C7—Ru1—C11  | 67.38 (10)  | C31—Ru2—C30 | 37.45 (10)  |
| C8—Ru1—C11  | 79.89 (10)  | C27—Ru2—C30 | 80.06 (10)  |
| C9—Ru1—C11  | 67.37 (10)  | C21—Ru2—C28 | 146.41 (12) |
| C4—Ru1—C10  | 108.86 (11) | C24—Ru2—C28 | 130.51 (11) |
| C3—Ru1—C10  | 136.17 (11) | C22—Ru2—C28 | 114.21 (11) |
| C1—Ru1—C10  | 139.76 (10) | C25—Ru2—C28 | 168.25 (11) |
| C2—Ru1—C10  | 172.75 (10) | C23—Ru2—C28 | 107.25 (11) |
| C5—Ru1—C10  | 110.73 (10) | C26—Ru2—C28 | 67.03 (10)  |
| C6—Ru1—C10  | 66.69 (10)  | C29—Ru2—C28 | 37.68 (10)  |
| C7—Ru1—C10  | 79.99 (10)  | C31—Ru2—C28 | 79.99 (10)  |
| C8—Ru1—C10  | 67.86 (9)   | C27—Ru2—C28 | 37.40 (10)  |
| C9—Ru1—C10  | 37.50 (10)  | C30—Ru2—C28 | 67.95 (10)  |
| C11—Ru1—C10 | 37.29 (9)   | C22—C21—C25 | 108.1 (3)   |
| C2—C1—C5    | 108.1 (3)   | C22—C21—Ru2 | 71.15 (17)  |
| C2—C1—Ru1   | 71.10 (16)  | C25—C21—Ru2 | 71.10 (16)  |
| C5—C1—Ru1   | 71.23 (16)  | C22—C21—H21 | 125.9       |
| C2—C1—H1    | 126.0       | C25—C21—H21 | 125.9       |
| C5—C1—H1    | 126.0       | Ru2—C21—H21 | 123.5       |
| Ru1—C1—H1   | 123.3       | C23—C22—C21 | 108.0 (3)   |
| C1—C2—C3    | 108.0 (3)   | C23—C22—Ru2 | 71.21 (17)  |
| C1—C2—Ru1   | 70.89 (16)  | C21—C22—Ru2 | 70.85 (17)  |
| C3—C2—Ru1   | 70.58 (17)  | C23—C22—H22 | 126.0       |



|            |             |             |             |
|------------|-------------|-------------|-------------|
| C1—C2—H2   | 126.0       | C21—C22—H22 | 126.0       |
| C3—C2—H2   | 126.0       | Ru2—C22—H22 | 123.6       |
| Ru1—C2—H2  | 124.1       | C22—C23—C24 | 107.8 (3)   |
| C2—C3—C4   | 107.7 (3)   | C22—C23—Ru2 | 70.97 (18)  |
| C2—C3—Ru1  | 71.24 (17)  | C24—C23—Ru2 | 70.74 (18)  |
| C4—C3—Ru1  | 70.73 (18)  | C22—C23—H23 | 126.1       |
| C2—C3—H3   | 126.1       | C24—C23—H23 | 126.1       |
| C4—C3—H3   | 126.1       | Ru2—C23—H23 | 123.8       |
| Ru1—C3—H3  | 123.5       | C25—C24—C23 | 108.5 (3)   |
| C5—C4—C3   | 108.0 (3)   | C25—C24—Ru2 | 71.25 (17)  |
| C5—C4—Ru1  | 71.58 (17)  | C23—C24—Ru2 | 71.23 (18)  |
| C3—C4—Ru1  | 70.90 (17)  | C25—C24—H24 | 125.7       |
| C5—C4—H4   | 126.0       | C23—C24—H24 | 125.7       |
| C3—C4—H4   | 126.0       | Ru2—C24—H24 | 123.4       |
| Ru1—C4—H4  | 123.2       | C24—C25—C21 | 107.6 (3)   |
| C4—C5—C1   | 108.2 (3)   | C24—C25—Ru2 | 71.00 (17)  |
| C4—C5—Ru1  | 70.49 (17)  | C21—C25—Ru2 | 70.80 (17)  |
| C1—C5—Ru1  | 70.77 (16)  | C24—C25—H25 | 126.2       |
| C4—C5—H5   | 125.9       | C21—C25—H25 | 126.2       |
| C1—C5—H5   | 125.9       | Ru2—C25—H25 | 123.6       |
| Ru1—C5—H5  | 124.4       | F2—C26—C31  | 118.4 (2)   |
| F1—C6—C11  | 118.3 (2)   | F2—C26—C27  | 118.8 (2)   |
| F1—C6—C7   | 118.6 (2)   | C31—C26—C27 | 122.8 (2)   |
| C11—C6—C7  | 123.1 (2)   | F2—C26—Ru2  | 127.91 (18) |
| F1—C6—Ru1  | 127.80 (18) | C31—C26—Ru2 | 72.45 (15)  |
| C11—C6—Ru1 | 72.69 (15)  | C27—C26—Ru2 | 72.38 (15)  |
| C7—C6—Ru1  | 72.16 (15)  | C26—C27—C28 | 119.0 (2)   |

|             |             |             |             |
|-------------|-------------|-------------|-------------|
| C6—C7—C8    | 118.7 (2)   | C26—C27—Ru2 | 70.40 (15)  |
| C6—C7—Ru1   | 70.80 (15)  | C28—C27—Ru2 | 71.63 (15)  |
| C8—C7—Ru1   | 71.32 (15)  | C26—C27—H27 | 120.5       |
| C6—C7—H7    | 120.7       | C28—C27—H27 | 120.5       |
| C8—C7—H7    | 120.7       | Ru2—C27—H27 | 129.8       |
| Ru1—C7—H7   | 129.5       | C27—C28—C29 | 119.8 (2)   |
| C7—C8—C9    | 119.5 (2)   | C27—C28—C32 | 118.3 (2)   |
| C7—C8—C12   | 118.0 (2)   | C29—C28—C32 | 121.9 (3)   |
| C9—C8—C12   | 122.5 (2)   | C27—C28—Ru2 | 70.98 (15)  |
| C7—C8—Ru1   | 71.07 (15)  | C29—C28—Ru2 | 70.66 (14)  |
| C9—C8—Ru1   | 71.25 (14)  | C32—C28—Ru2 | 130.30 (19) |
| C12—C8—Ru1  | 129.35 (19) | C28—C29—C30 | 119.8 (2)   |
| C10—C9—C8   | 120.2 (2)   | C28—C29—C33 | 120.1 (3)   |
| C10—C9—C13  | 120.2 (3)   | C30—C29—C33 | 120.1 (2)   |
| C8—C9—C13   | 119.6 (3)   | C28—C29—Ru2 | 71.66 (15)  |
| C10—C9—Ru1  | 71.53 (14)  | C30—C29—Ru2 | 71.50 (14)  |
| C8—C9—Ru1   | 71.09 (14)  | C33—C29—Ru2 | 126.40 (18) |
| C13—C9—Ru1  | 129.53 (17) | C31—C30—C29 | 119.4 (2)   |
| C11—C10—C9  | 119.6 (2)   | C31—C30—C34 | 118.5 (2)   |
| C11—C10—C14 | 118.0 (2)   | C29—C30—C34 | 122.0 (2)   |
| C9—C10—C14  | 122.4 (2)   | C31—C30—Ru2 | 70.94 (15)  |
| C11—C10—Ru1 | 71.32 (15)  | C29—C30—Ru2 | 70.58 (14)  |
| C9—C10—Ru1  | 70.97 (14)  | C34—C30—Ru2 | 129.70 (19) |
| C14—C10—Ru1 | 130.39 (19) | C26—C31—C30 | 119.2 (2)   |
| C6—C11—C10  | 118.9 (2)   | C26—C31—Ru2 | 70.56 (15)  |
| C6—C11—Ru1  | 70.41 (15)  | C30—C31—Ru2 | 71.61 (15)  |
| C10—C11—Ru1 | 71.39 (15)  | C26—C31—H31 | 120.4       |

|               |            |                     |           |
|---------------|------------|---------------------|-----------|
| C6—C11—H11    | 120.6      | C30—C31—H31         | 120.4     |
| C10—C11—H11   | 120.6      | Ru2—C31—H31         | 129.9     |
| Ru1—C11—H11   | 130.1      | C28—C32—H32A        | 109.5     |
| C8—C12—H12A   | 109.5      | C28—C32—H32B        | 109.5     |
| C8—C12—H12B   | 109.5      | H32A—C32—H32B       | 109.5     |
| H12A—C12—H12B | 109.5      | C28—C32—H32C        | 109.5     |
| C8—C12—H12C   | 109.5      | H32A—C32—H32C       | 109.5     |
| H12A—C12—H12C | 109.5      | H32B—C32—H32C       | 109.5     |
| H12B—C12—H12C | 109.5      | C29—C33—H33A        | 109.5     |
| C9—C13—H13A   | 109.5      | C29—C33—H33B        | 109.5     |
| C9—C13—H13B   | 109.5      | H33A—C33—H33B       | 109.5     |
| H13A—C13—H13B | 109.5      | C29—C33—H33C        | 109.5     |
| C9—C13—H13C   | 109.5      | H33A—C33—H33C       | 109.5     |
| H13A—C13—H13C | 109.5      | H33B—C33—H33C       | 109.5     |
| H13B—C13—H13C | 109.5      | C30—C34—H34A        | 109.5     |
| C10—C14—H14A  | 109.5      | C30—C34—H34B        | 109.5     |
| C10—C14—H14B  | 109.5      | H34A—C34—H34B       | 109.5     |
| H14A—C14—H14B | 109.5      | C30—C34—H34C        | 109.5     |
| C10—C14—H14C  | 109.5      | H34A—C34—H34C       | 109.5     |
| H14A—C14—H14C | 109.5      | H34B—C34—H34C       | 109.5     |
| H14B—C14—H14C | 109.5      | H1WA—O1W—H1WB       | 107 (3)   |
| C21—Ru2—C24   | 63.33 (12) | H2WA—O2W—H2WB       | 106 (4)   |
| C5—C1—C2—C3   | 0.9 (3)    | C25—C21—C22—<br>C23 | -0.1 (3)  |
| Ru1—C1—C2—C3  | -61.2 (2)  | Ru2—C21—C22—<br>C23 | -61.9 (2) |
| C5—C1—C2—Ru1  | 62.0 (2)   | C25—C21—C22—<br>Ru2 | 61.8 (2)  |

|               |           |                     |           |
|---------------|-----------|---------------------|-----------|
| C1—C2—C3—C4   | -0.3 (3)  | C21—C22—C23—<br>C24 | 0.1 (3)   |
| Ru1—C2—C3—C4  | -61.7 (2) | Ru2—C22—C23—<br>C24 | -61.5 (2) |
| C1—C2—C3—Ru1  | 61.4 (2)  | C21—C22—C23—<br>Ru2 | 61.7 (2)  |
| C2—C3—C4—C5   | -0.3 (3)  | C22—C23—C24—<br>C25 | -0.2 (4)  |
| Ru1—C3—C4—C5  | -62.3 (2) | Ru2—C23—C24—<br>C25 | -61.8 (2) |
| C2—C3—C4—Ru1  | 62.0 (2)  | C22—C23—C24—<br>Ru2 | 61.7 (2)  |
| C3—C4—C5—C1   | 0.9 (3)   | C23—C24—C25—<br>C21 | 0.1 (3)   |
| Ru1—C4—C5—C1  | -61.0 (2) | Ru2—C24—C25—<br>C21 | -61.7 (2) |
| C3—C4—C5—Ru1  | 61.9 (2)  | C23—C24—C25—<br>Ru2 | 61.8 (2)  |
| C2—C1—C5—C4   | -1.1 (3)  | C22—C21—C25—<br>C24 | 0.0 (3)   |
| Ru1—C1—C5—C4  | 60.9 (2)  | Ru2—C21—C25—<br>C24 | 61.8 (2)  |
| C2—C1—C5—Ru1  | -61.9 (2) | C22—C21—C25—<br>Ru2 | -61.9 (2) |
| F1—C6—C7—C8   | 178.7 (2) | F2—C26—C27—C28      | 178.7 (2) |
| C11—C6—C7—C8  | 0.4 (4)   | C31—C26—C27—<br>C28 | 0.1 (4)   |
| Ru1—C6—C7—C8  | 54.8 (2)  | Ru2—C26—C27—<br>C28 | 54.6 (2)  |
| F1—C6—C7—Ru1  | 123.9 (2) | F2—C26—C27—Ru2      | 124.1 (2) |
| C11—C6—C7—Ru1 | -54.3 (2) | C31—C26—C27—        | -54.5 (2) |

|                |            |                     |            |
|----------------|------------|---------------------|------------|
|                |            | Ru2                 |            |
| C6—C7—C8—C9    | -0.3 (4)   | C26—C27—C28—<br>C29 | -0.9 (4)   |
| Ru1—C7—C8—C9   | 54.2 (2)   | Ru2—C27—C28—<br>C29 | 53.1 (2)   |
| C6—C7—C8—C12   | -179.7 (2) | C26—C27—C28—<br>C32 | 179.7 (2)  |
| Ru1—C7—C8—C12  | -125.2 (2) | Ru2—C27—C28—<br>C32 | -126.3 (2) |
| C6—C7—C8—Ru1   | -54.5 (2)  | C26—C27—C28—<br>Ru2 | -54.0 (2)  |
| C7—C8—C9—C10   | -0.1 (4)   | C27—C28—C29—<br>C30 | 1.7 (4)    |
| C12—C8—C9—C10  | 179.3 (3)  | C32—C28—C29—<br>C30 | -179.0 (2) |
| Ru1—C8—C9—C10  | 54.1 (2)   | Ru2—C28—C29—<br>C30 | 54.9 (2)   |
| C7—C8—C9—C13   | -179.5 (2) | C27—C28—C29—<br>C33 | -175.2 (2) |
| C12—C8—C9—C13  | -0.1 (4)   | C32—C28—C29—<br>C33 | 4.0 (4)    |
| Ru1—C8—C9—C13  | -125.4 (2) | Ru2—C28—C29—<br>C33 | -122.0 (2) |
| C7—C8—C9—Ru1   | -54.2 (2)  | C27—C28—C29—<br>Ru2 | -53.2 (2)  |
| C12—C8—C9—Ru1  | 125.3 (2)  | C32—C28—C29—<br>Ru2 | 126.1 (3)  |
| C8—C9—C10—C11  | 0.3 (4)    | C28—C29—C30—<br>C31 | -1.6 (4)   |
| C13—C9—C10—C11 | 179.8 (2)  | C33—C29—C30—<br>C31 | 175.3 (2)  |

|                     |            |                     |            |
|---------------------|------------|---------------------|------------|
| Ru1—C9—C10—C11      | 54.2 (2)   | Ru2—C29—C30—<br>C31 | 53.4 (2)   |
| C8—C9—C10—C14       | 179.8 (3)  | C28—C29—C30—<br>C34 | 179.7 (2)  |
| C13—C9—C10—C14      | -0.8 (4)   | C33—C29—C30—<br>C34 | -3.4 (4)   |
| Ru1—C9—C10—C14      | -126.4 (2) | Ru2—C29—C30—<br>C34 | -125.3 (2) |
| C8—C9—C10—Ru1       | -53.9 (2)  | C28—C29—C30—<br>Ru2 | -55.0 (2)  |
| C13—C9—C10—Ru1      | 125.6 (2)  | C33—C29—C30—<br>Ru2 | 122.0 (2)  |
| F1—C6—C11—C10       | -178.5 (2) | F2—C26—C31—C30      | -178.6 (2) |
| C7—C6—C11—C10       | -0.2 (4)   | C27—C26—C31—<br>C30 | 0.0 (4)    |
| Ru1—C6—C11—C10      | -54.3 (2)  | Ru2—C26—C31—<br>C30 | -54.5 (2)  |
| F1—C6—C11—Ru1       | -124.1 (2) | F2—C26—C31—Ru2      | -124.2 (2) |
| C7—C6—C11—Ru1       | 54.1 (2)   | C27—C26—C31—<br>Ru2 | 54.5 (2)   |
| C9—C10—C11—C6       | -0.1 (4)   | C29—C30—C31—<br>C26 | 0.8 (4)    |
| C14—C10—C11—C6      | -179.6 (2) | C34—C30—C31—<br>C26 | 179.5 (2)  |
| Ru1—C10—C11—C6      | 53.8 (2)   | Ru2—C30—C31—<br>C26 | 54.0 (2)   |
| C9—C10—C11—Ru1      | -54.0 (2)  | C29—C30—C31—<br>Ru2 | -53.2 (2)  |
| C14—C10—C11—<br>Ru1 | 126.5 (2)  | C34—C30—C31—<br>Ru2 | 125.5 (2)  |

Table S7. Hydrogen-bond parameters

| $D-H\cdots A$         | $D-H$ (Å) | $H\cdots A$ (Å) | $D\cdots A$ (Å) | $D-H\cdots A$ (°) |
|-----------------------|-----------|-----------------|-----------------|-------------------|
| O1W—H1WB $\cdots$ Cl1 | 0.77 (4)  | 2.46 (4)        | 3.220 (2)       | 170 (4)           |
| O1W—H1WA $\cdots$ Cl2 | 0.85 (4)  | 2.38 (4)        | 3.215 (2)       | 167 (3)           |
| O2W—H2WA $\cdots$ Cl2 | 0.78 (5)  | 2.51 (5)        | 3.260 (3)       | 160 (4)           |
| O2W—H2WB $\cdots$ Cl3 | 0.83 (5)  | 2.43 (5)        | 3.254 (3)       | 170 (4)           |

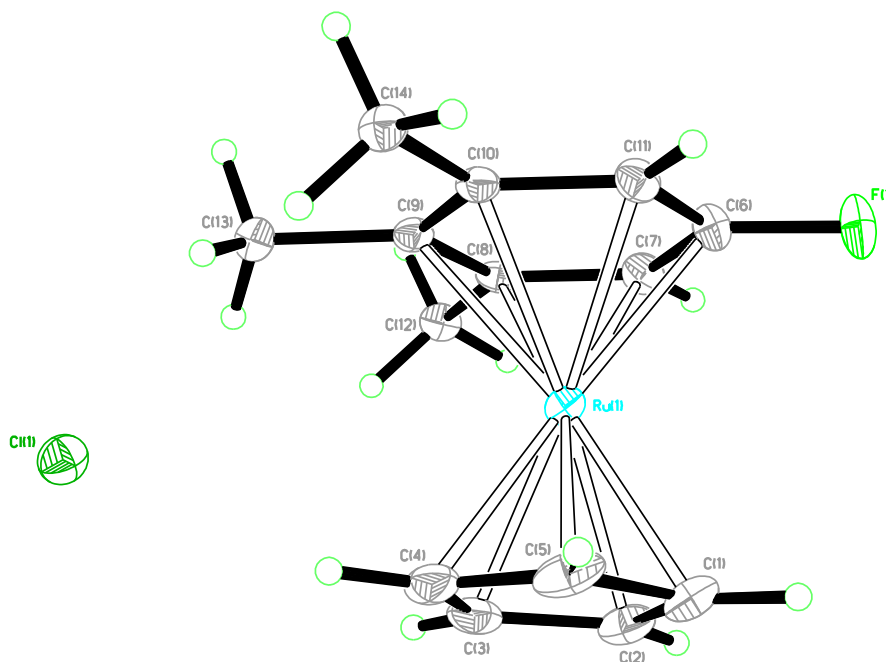

**Figure 69.** Perspective view of **6** showing 50% probability displacement.

## REFERENCES

- Shriver, D. F.; Drezdon, M. A. Inert-Atmosphere Glove Boxes. *The Manipulation of Air-Sensitive Compounds*, 2nd ed.; John Wiley & Sons: New York, **1986**; pp. 45–67.
- Pangborn, A. B.; Giardello, M. A.; Grubbs, R. H.; Rosen, R. K.; Timmers, F. J. Safe and convenient procedure for solvent purification. *Organometallics* **1996**, *15*, 1518–1520.
- The  $^1\text{H}$  NMR spectroscopic data correspond to the data reported in the literature. See: Oakdale, J. S.; Sit, R. K.; Fokin, V. V. Ruthenium-catalyzed cycloadditions of 1-haloalkynes with nitrile oxides and organic azides: synthesis of 4-haloisoxazoles and 5-halotriazoles. *Chem. Eur. J.* **2014**, *20*, 11101–11110.
- Carroll, F. I.; Tyagi, S.; Blough, B. E.; Kuhar, M. J.; Navaro, H. A. Synthesis and monoamine transporter binding properties of 3 $\alpha$ -(substituted phenyl)nortropane-2 $\beta$ -carboxylic acid methyl esters. Norepinephrine transporter selective compounds. *J. Med. Chem.* **2005**, *48*, 3852–3857.

5. Yu, L.; Cui, J.; Padakanti, P. K.; Engel, L.; Bagchi, D. P.; Kotzbauer, P. T.; Tu, Z. Synthesis and in vitro evaluation of  $\alpha$ -synuclein ligands. *Bioorg. Med. Chem.* **2012**, *20*, 4625–4634.
6. Frisch, M. J. et al. Gaussian 09, Revision A.1. *Gaussian, Inc., Wallingford CT (2009)*.
7. Hanwell, M.; Curtis, D. E.; Lonie, D. C.; Vandermeersch, T.; Zurek, E.; Hutchison, G. R. Avogadro: an advanced semantic chemical editor, visualization, and analysis platform. *J. Cheminform.* **2012**, *4*, 1–17.
8. GaussView 5.0.8 Semichem Inc., Shawnee Mission, KS (**2009**).
9. Becke, A. D. Density-functional exchange-energy approximation with correct asymptotic behavior. *Phys. Rev. A: At. Mol. Opt. Phys.* **1988**, *38*, 3098–3100.
10. Stephens, P. J.; Devlin, F. J.; Chabalowski, C. F.; Frisch, M. J. Ab initio calculation of vibrational absorption and circular dichroism spectra using density functional force fields. *J. Phys. Chem.* **1994**, *98*, 11623–11627.
11. Lee, C.; Yang, W.; Parr, R. G. Development of the Colle-Salvetti correlation-energy formula into a functional of the electron density. *Phys. Rev. B: Condens. Matter* **1988**, *37*, 785–789.
12. Davidson, E. R.; Feller, D. Basis set selection for molecular calculations. *Chem. Rev.* **1986**, *86*, 681–696.
13. Tomasi, J.; Mennucci, B.; Cammi, R. Quantum mechanical continuum solvation models. *Chem. Rev.* **2005**, *105*, 2999–3093.
14. Bridgeman, A. J. Modeling the vibronic spectra of transition metal complexes: The ligand-field spectrum of  $[\text{PtCl}_4]_2^-$ . *Inorg. Chem.* **2008**, *47*, 4817–4825.
15. Neumann, C. N.; Hooker, J. M.; Ritter, T. Concerted nucleophilic aromatic substitution with  $^{19}\text{F}^-$  and  $^{18}\text{F}^-$ . *Nature* **2016**, *534*, 369–373.
16. Sheldrick, G. M. SHELXT – Integrated space-group and crystal-structure determination. *Acta Cryst.* **2015**, *A71*, 3–8.
17. Dolomanov, O. V.; Bourhis, L. J.; Gildea, R. J.; Howard J. A. K.; Puschmann, H. OLEX2: A complete structure solution, refinement and analysis program. *J. Appl. Cryst.* **2009**, *42*, 339–341.
18. Accelrys DS Visualizer v2.0.1, *Accelrys Software, Inc., 2007*.



## SPECTROSCOPIC DATA

## NMR Data

 $^1\text{H}$  NMR of  $[\text{CpRu}(\text{cod})\text{Cl}]$  (**1**):500 MHz,  $\text{CDCl}_3$ , 23 °C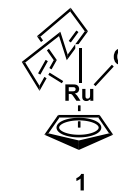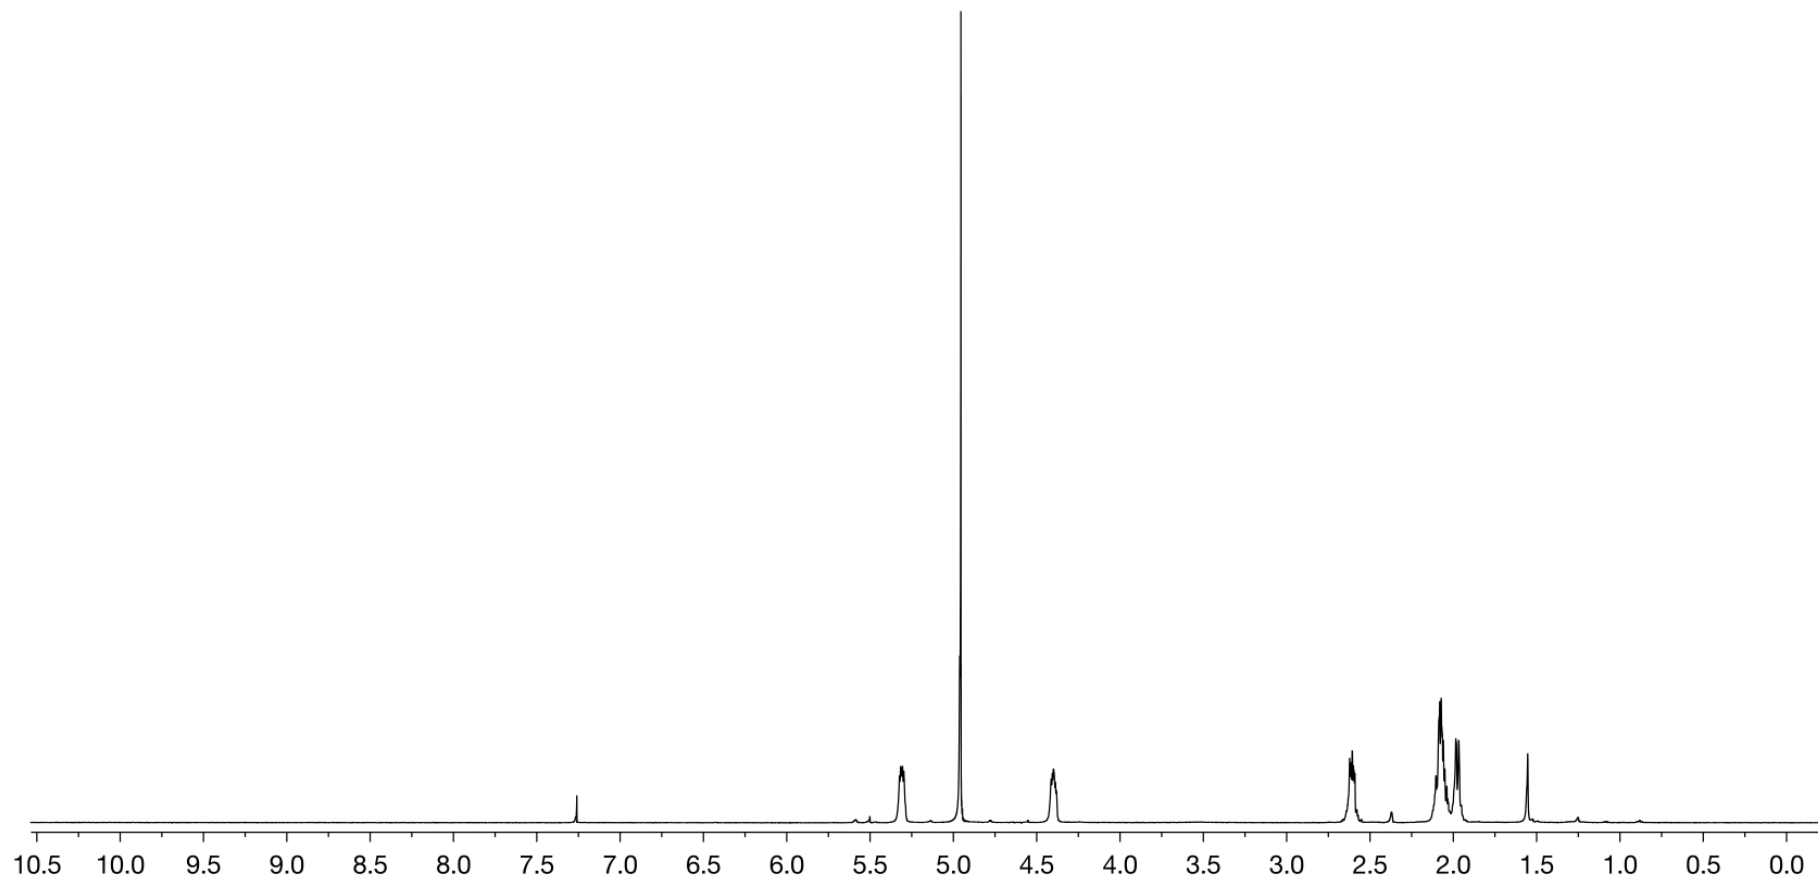

$^{13}\text{C}$  NMR of  $[\text{CpRu}(\text{cod})\text{Cl}]$  (**1**):

125 MHz,  $\text{CDCl}_3$ , 23 °C

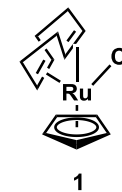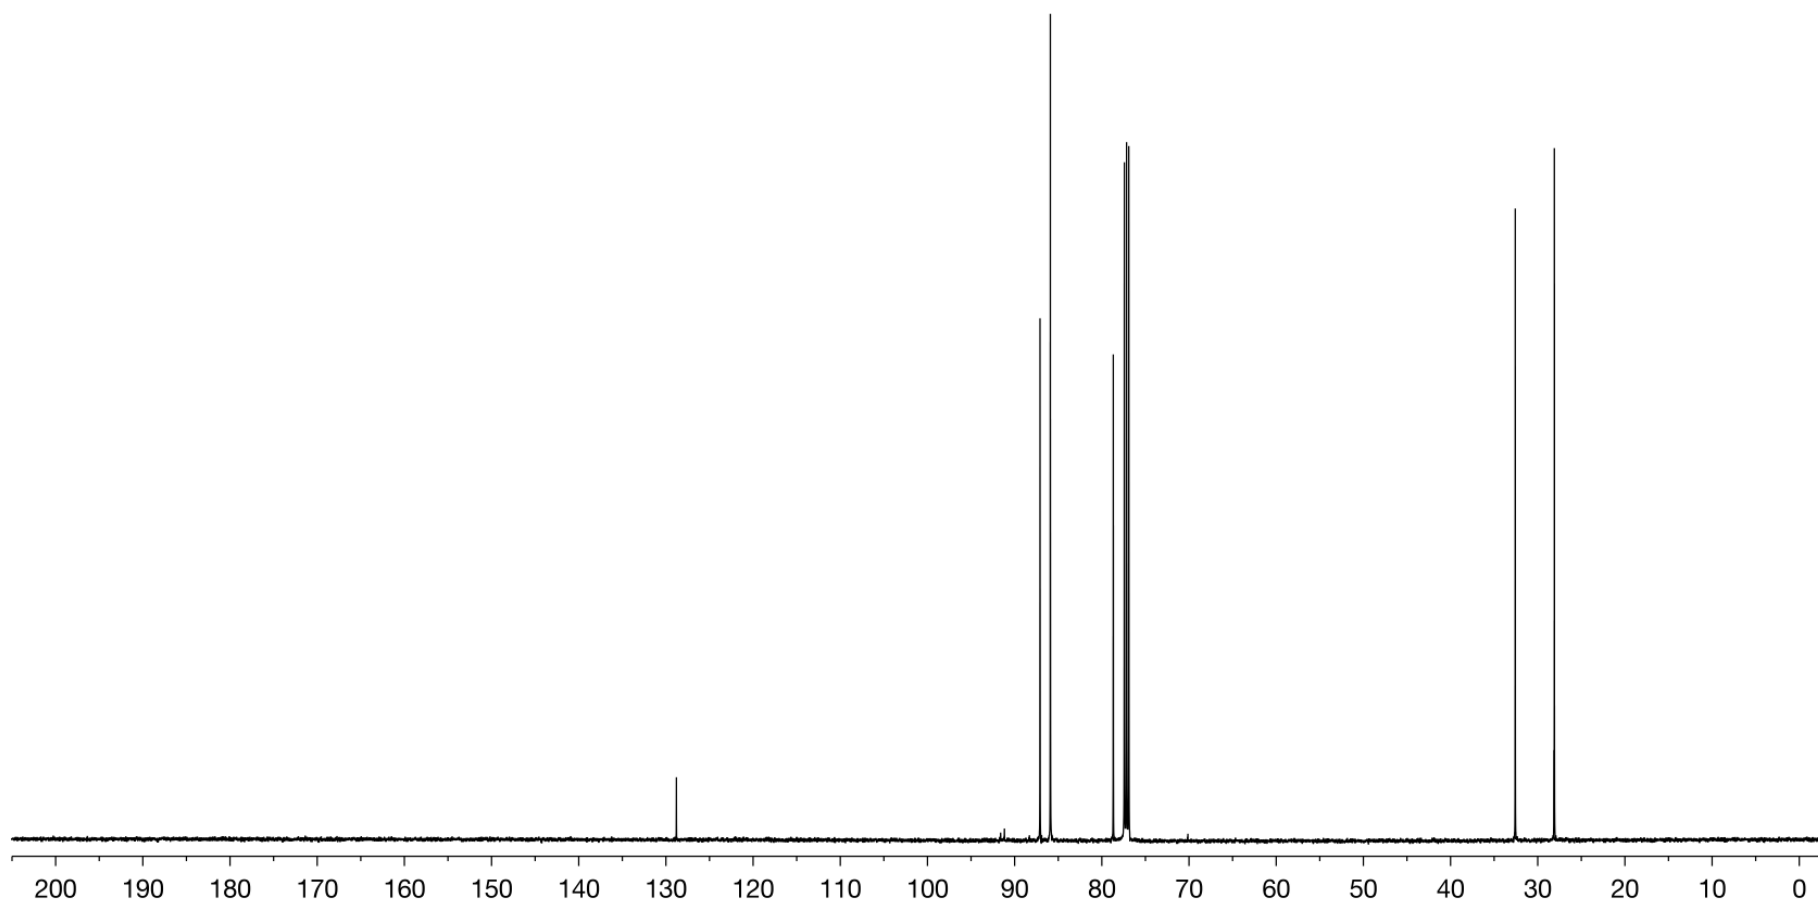

$^1\text{H}$  NMR of  $[(\eta^6\text{-}3,4,5\text{-trimethylphenol})\text{RuCp}]\text{Cl}$  (**5**):

600 MHz,  $\text{CDCl}_3$ , 23  $^\circ\text{C}$

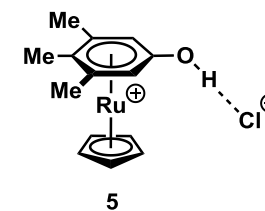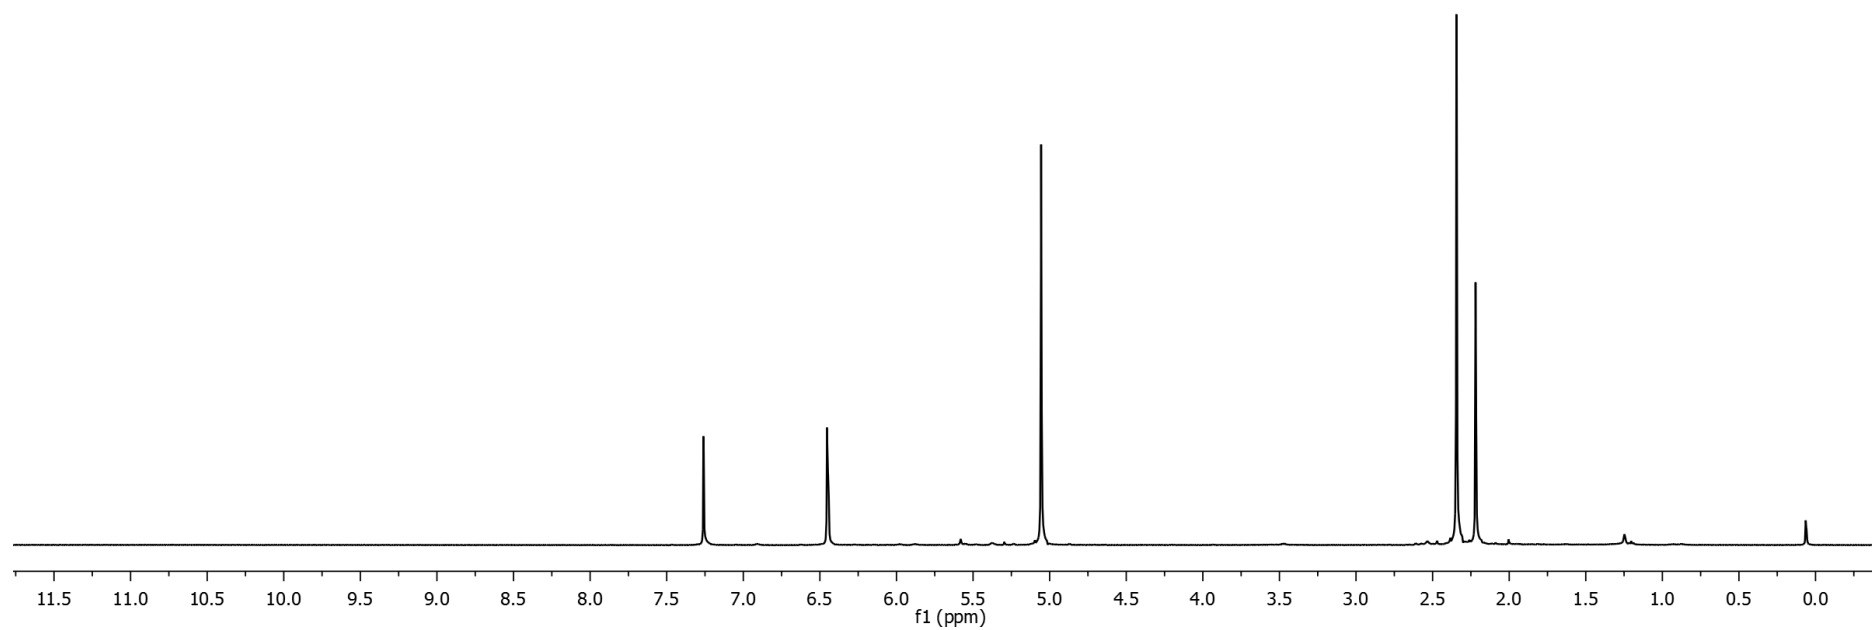

$^{13}\text{C}$  NMR of  $[(\eta^6\text{-}3,4,5\text{-trimethylphenol})\text{RuCp}]\text{Cl}$  (**5**):

126 MHz,  $\text{CDCl}_3$ , 23 °C

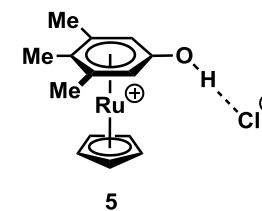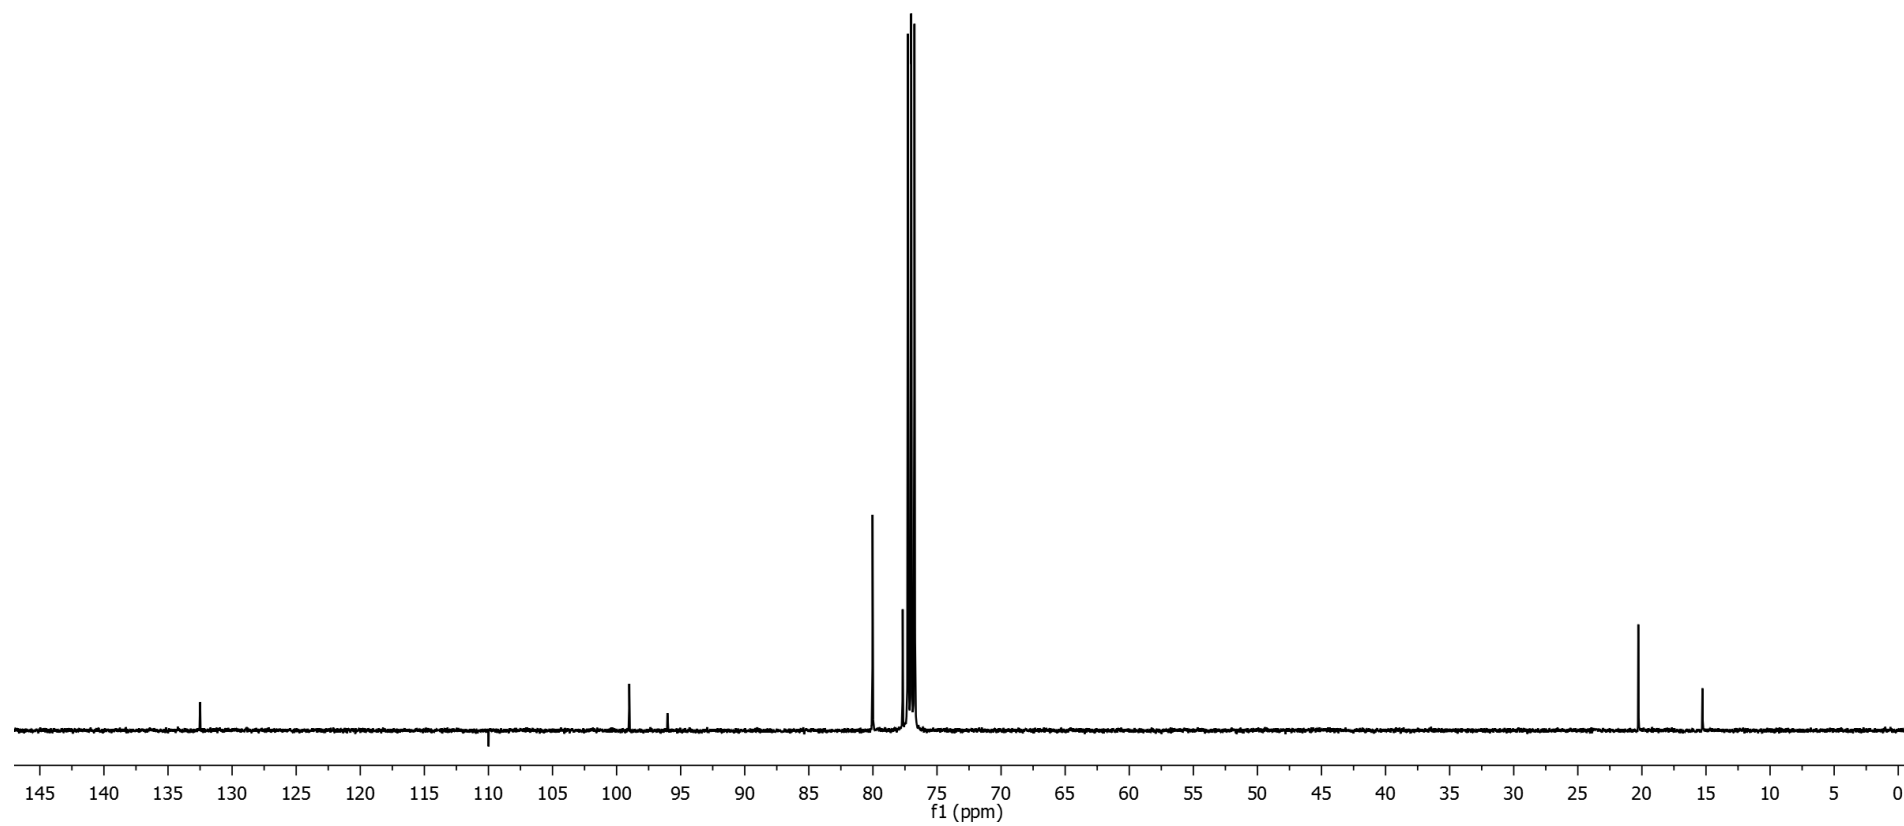

$^1\text{H}$  NMR of  $[(\eta^6\text{-5-fluoro-1,2,3-trimethylbenzene})\text{RuCp}]\text{Cl}$  (**6**):

600 MHz,  $\text{CD}_2\text{Cl}_2$ , 23 °C

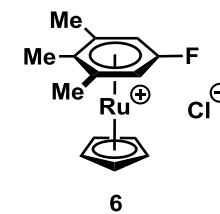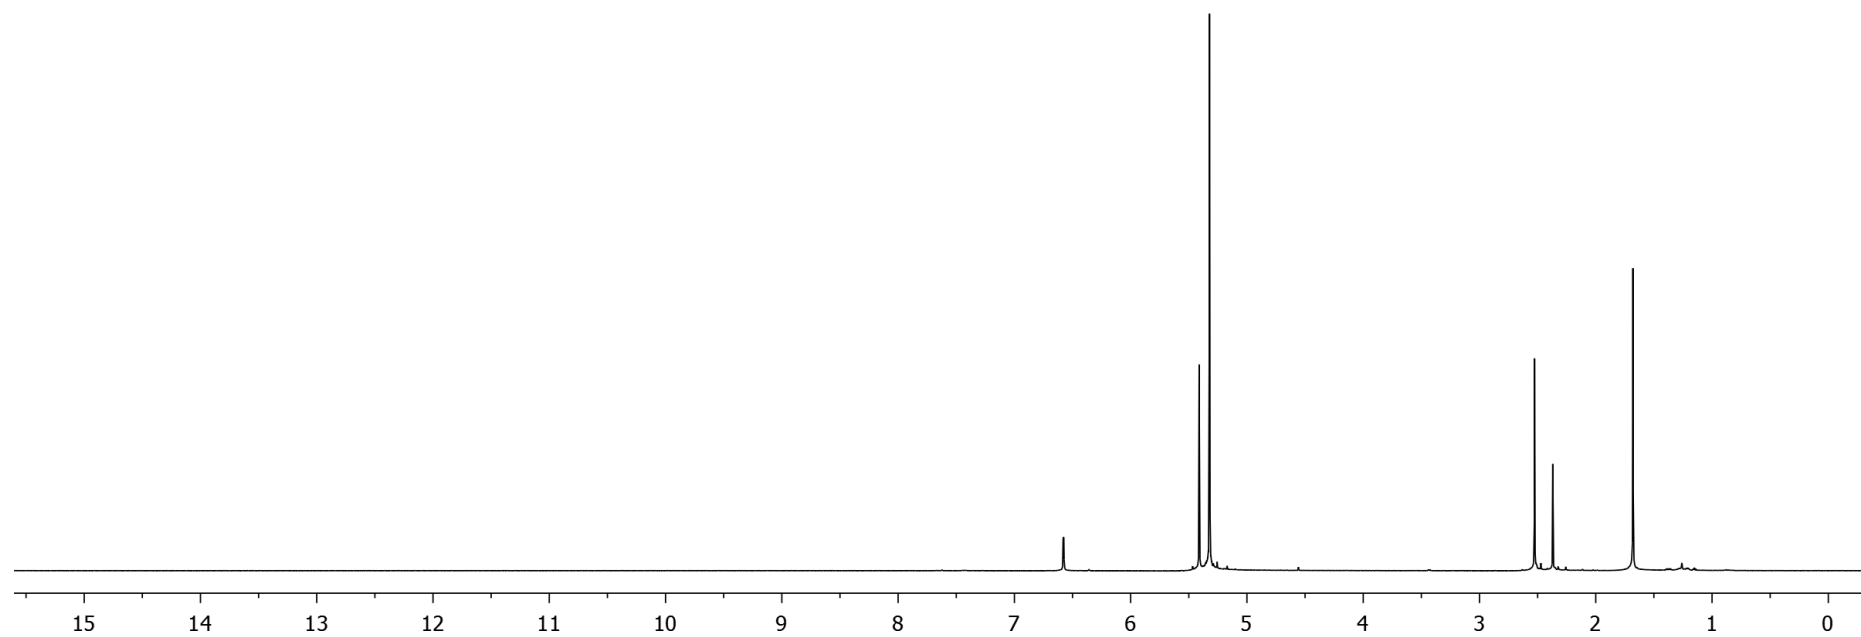

$^{13}\text{C}$  NMR of  $[(\eta^6\text{-5-fluoro-1,2,3-trimethylbenzene})\text{RuCp}]\text{Cl}$  (**6**):

126 MHz,  $\text{CD}_2\text{Cl}_2$ , 23 °C

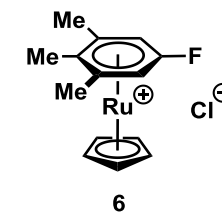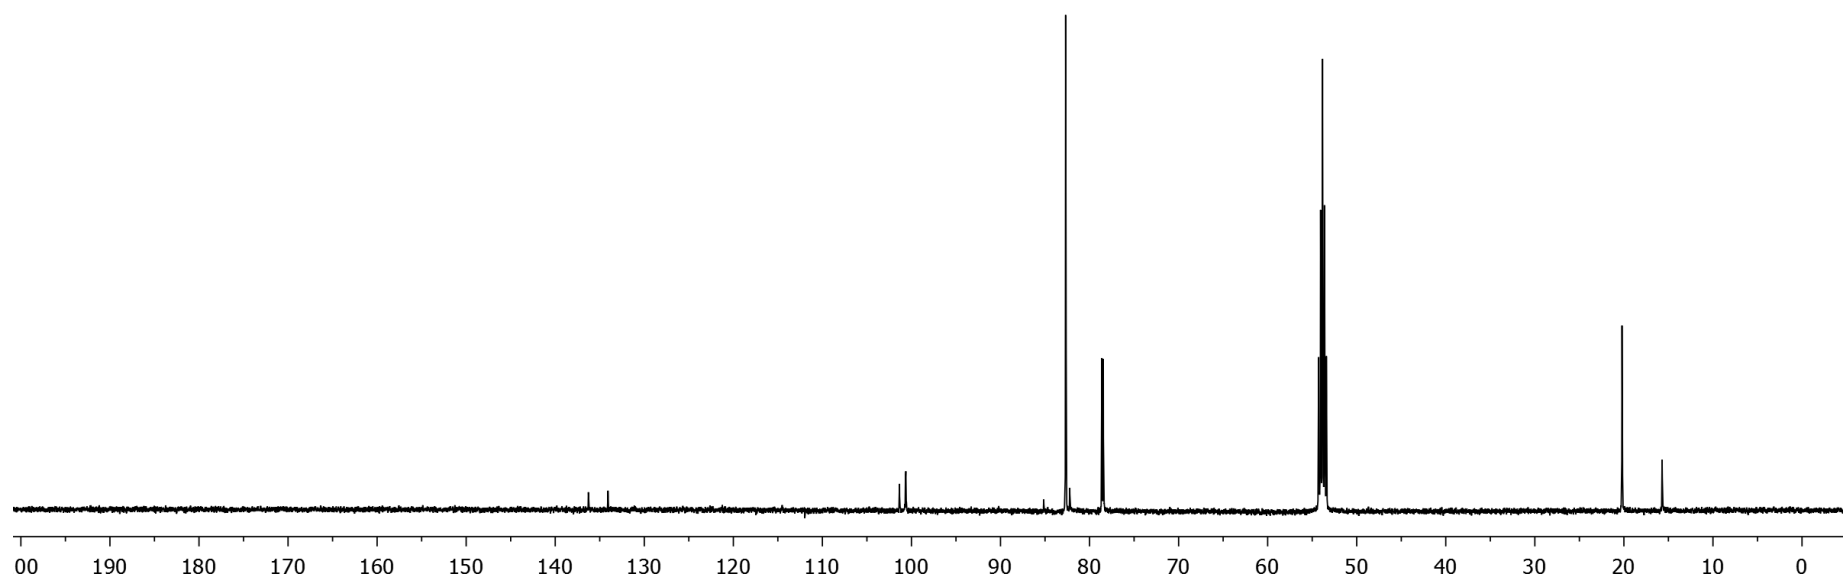

$^{19}\text{F}$  NMR of  $[(\eta^6\text{-5-fluoro-1,2,3-trimethylbenzene})\text{RuCp}]\text{Cl}$  (**6**):

471 MHz,  $\text{CD}_2\text{Cl}_2$ , 23 °C

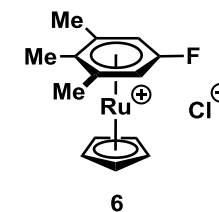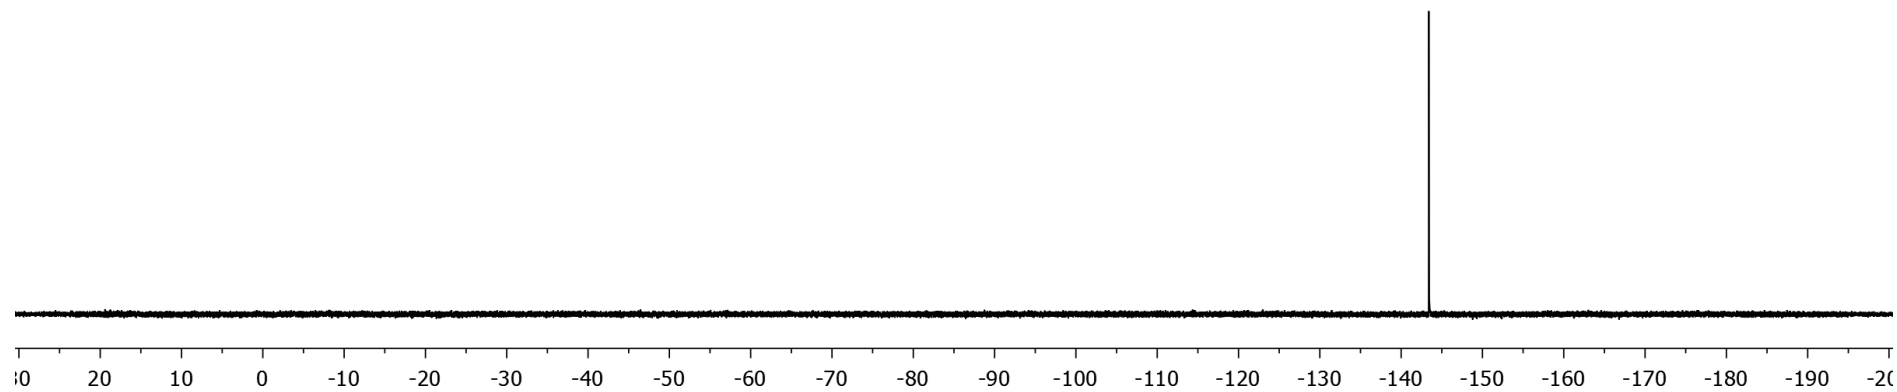

$^1\text{H}$  NMR of Methyl (1*R*,5*S*)-8-methyl-3-(((trifluoromethyl)sulfonyl)oxy)-8-azabicyclo[3.2.1]oct-2-ene-2-carboxylate (**S2**):

500 MHz,  $\text{CDCl}_3$ , 23 °C

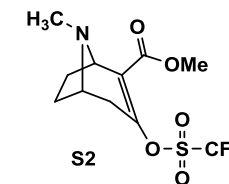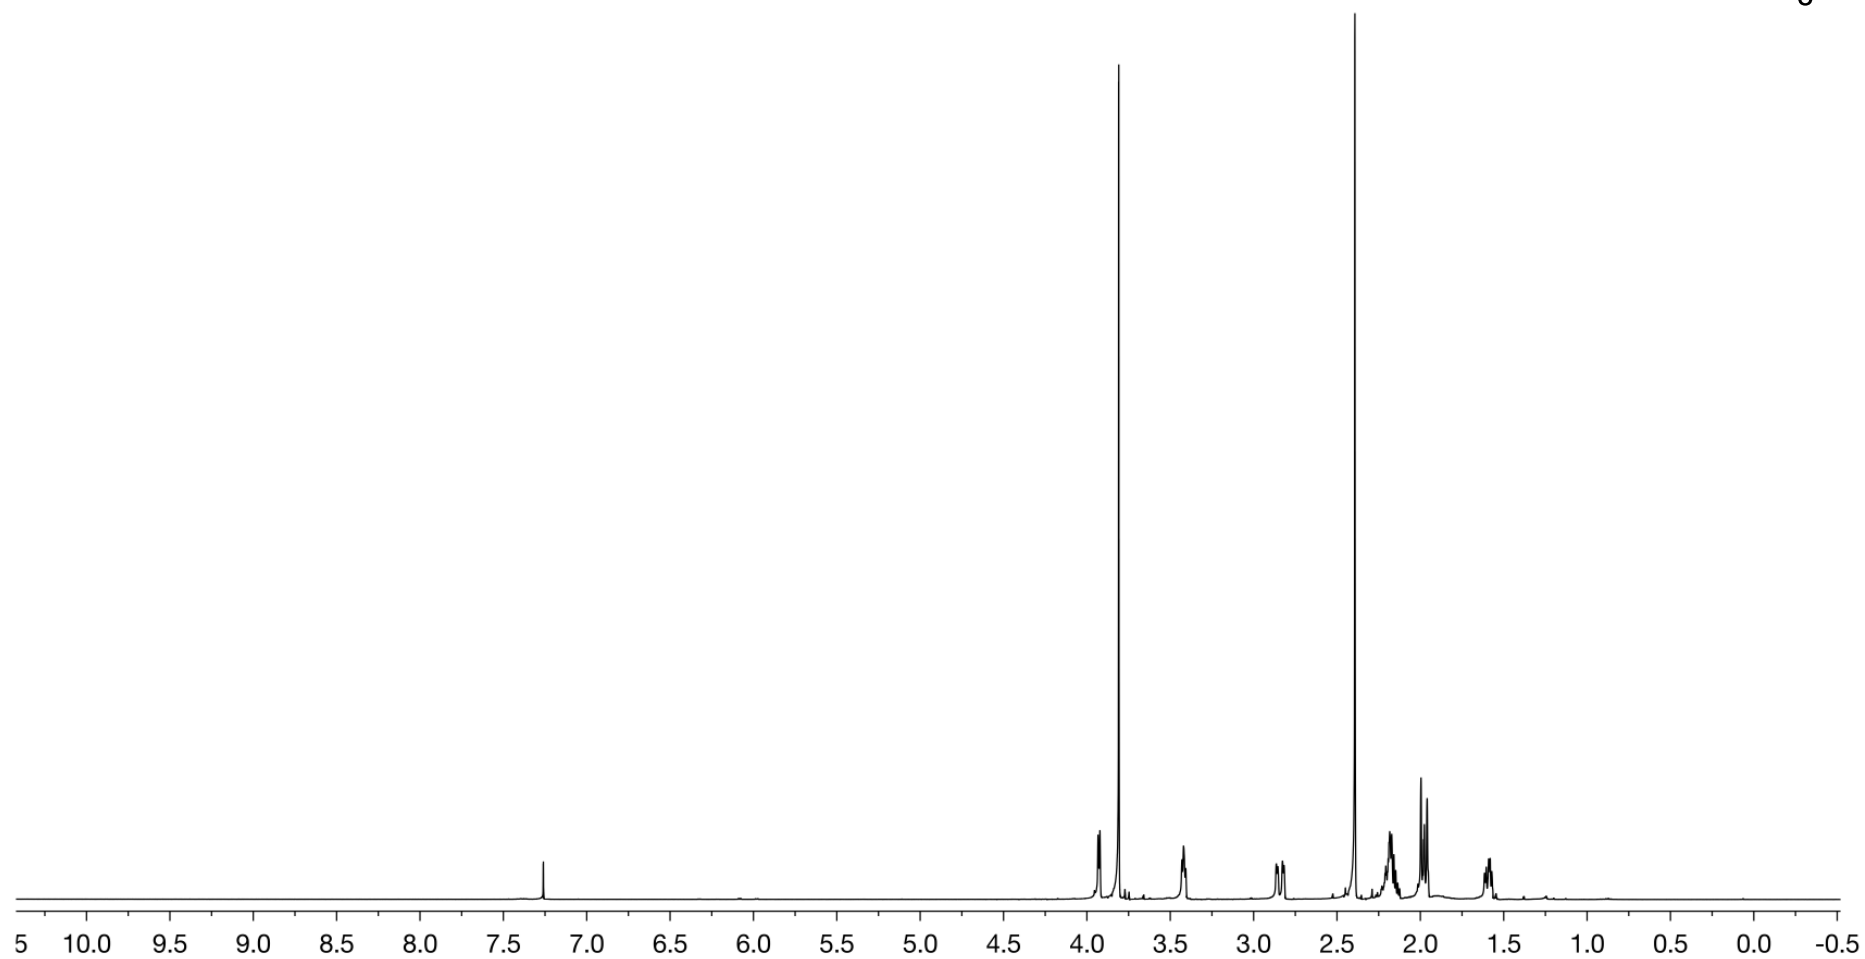



$^{13}\text{C}$  NMR of Methyl (1*R*,5*S*)-8-methyl-3-(((trifluoromethyl)sulfonyl)oxy)-8-azabicyclo[3.2.1]oct-2-ene-2-carboxylate (**S2**):

125 MHz,  $\text{CDCl}_3$ , 23 °C

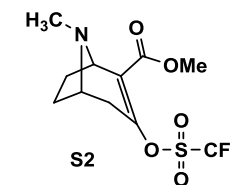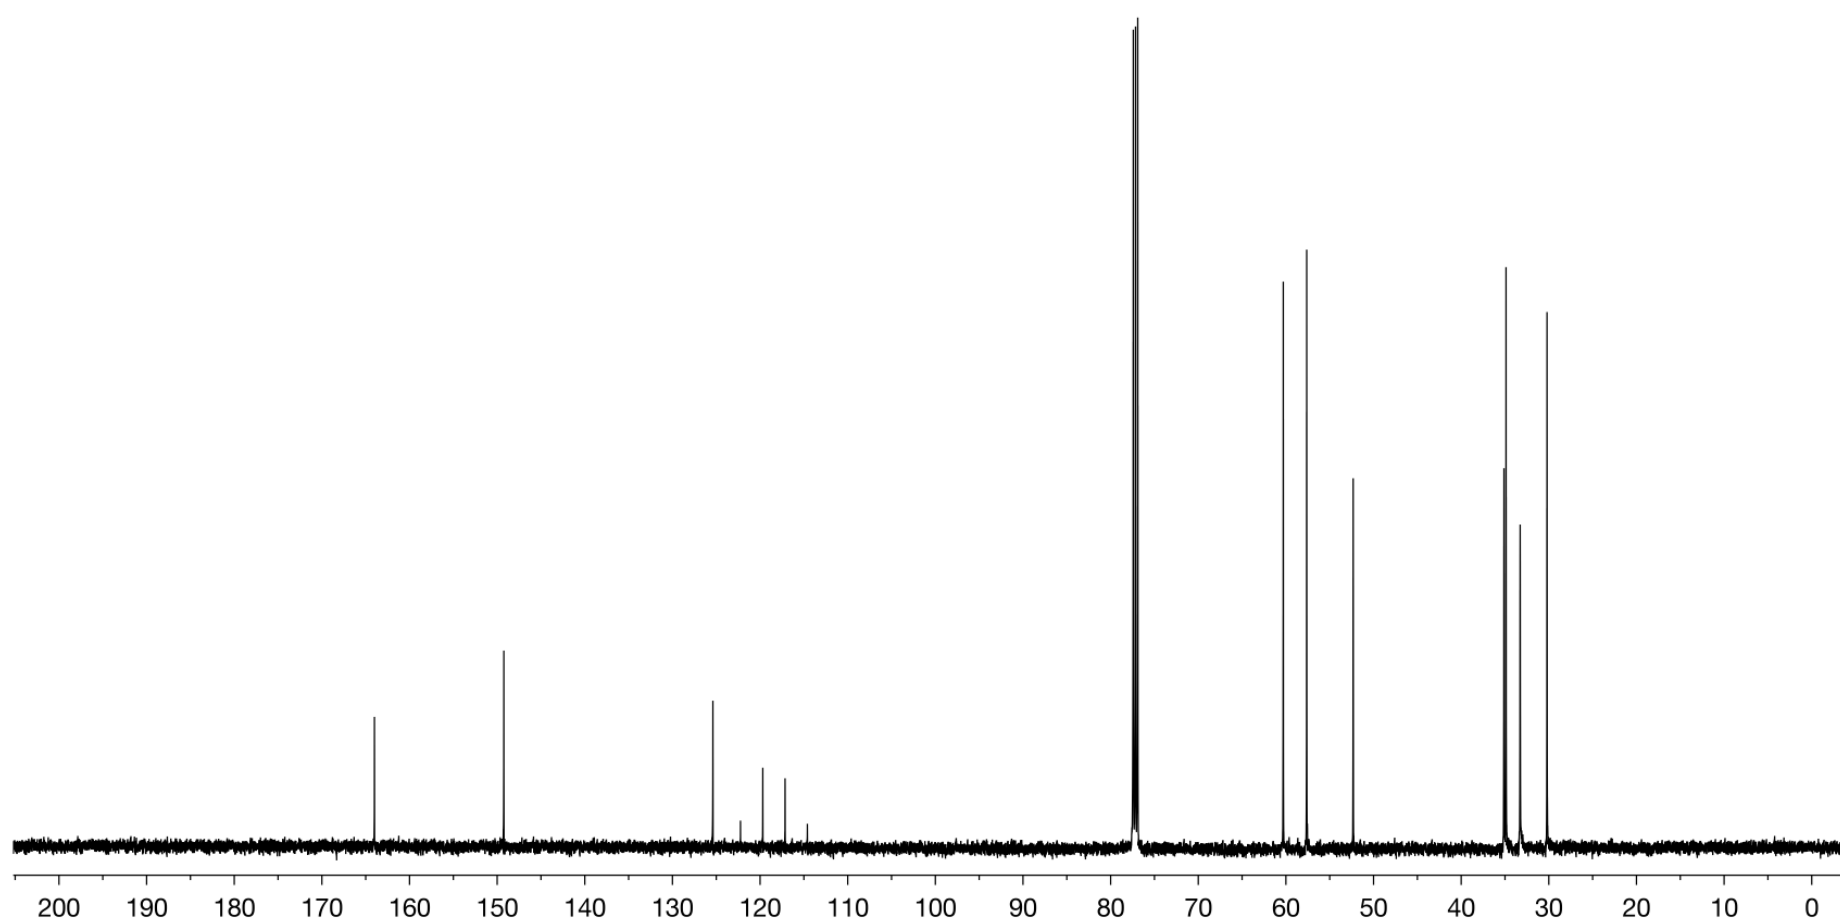

$^1\text{H}$  NMR of methyl (1*R*,5*S*)-3-(4-hydroxyphenyl)-8-methyl-8-azabicyclo[3.2.1]oct-2-ene-2-carboxylate (**S3**):

500 MHz,  $\text{CD}_2\text{Cl}_2$ , 23 °C

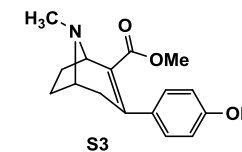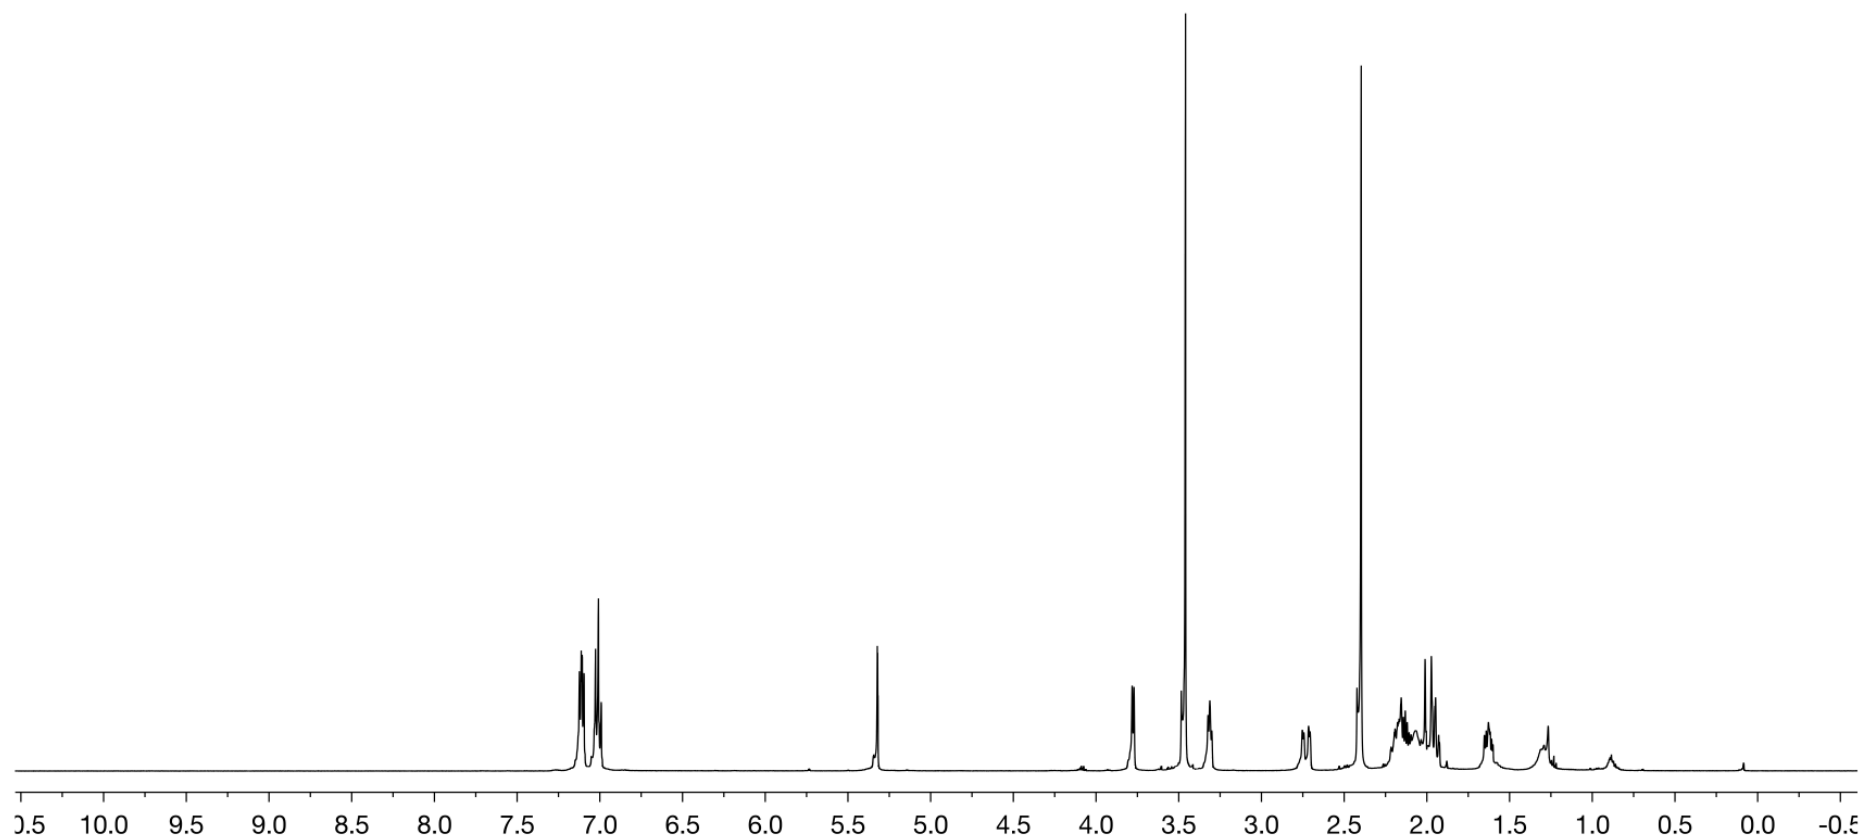

$^{13}\text{C}$  NMR of methyl (1*R*,5*S*)-3-(4-hydroxyphenyl)-8-methyl-8-azabicyclo[3.2.1]oct-2-ene-2-carboxylate (**S3**):

125 MHz,  $\text{CD}_2\text{Cl}_2$ , 23 °C

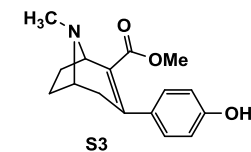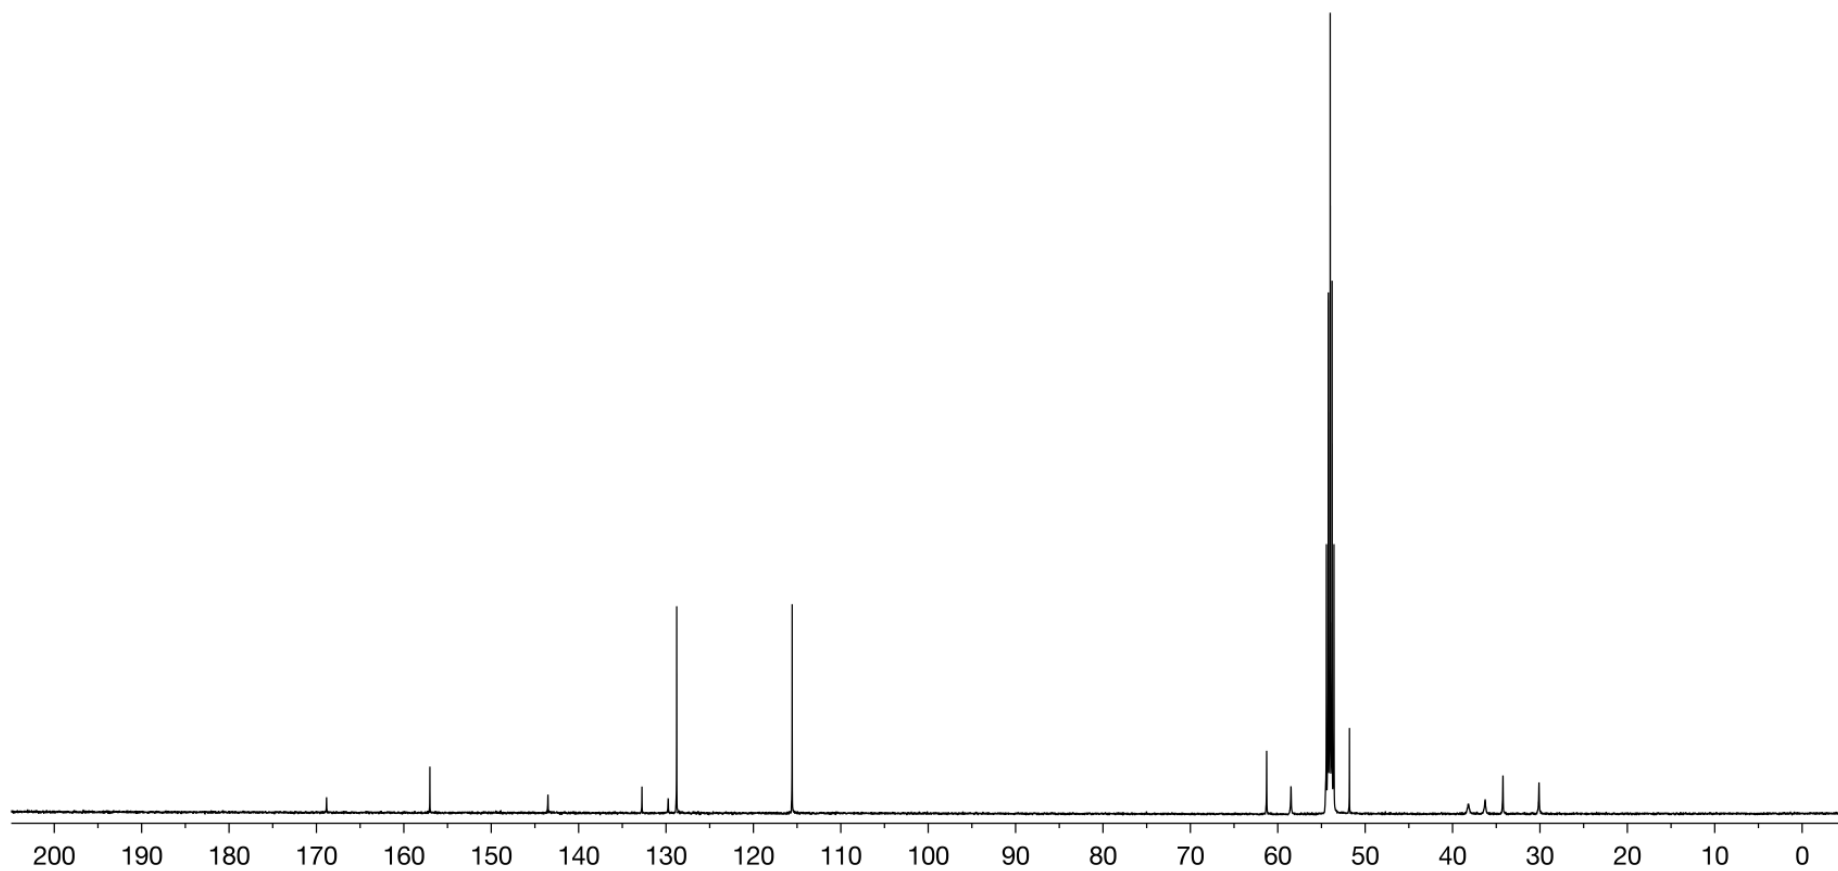

$^1\text{H}$  NMR of Methyl (1*R*,2*S*,3*S*,5*S*)-3-(4-hydroxyphenyl)-8-methyl-8-azabicyclo[3.2.1]octane-2-carboxylate (**3**):

500 MHz,  $\text{CD}_3\text{OD}$ , 23 °C

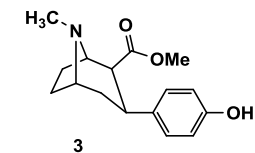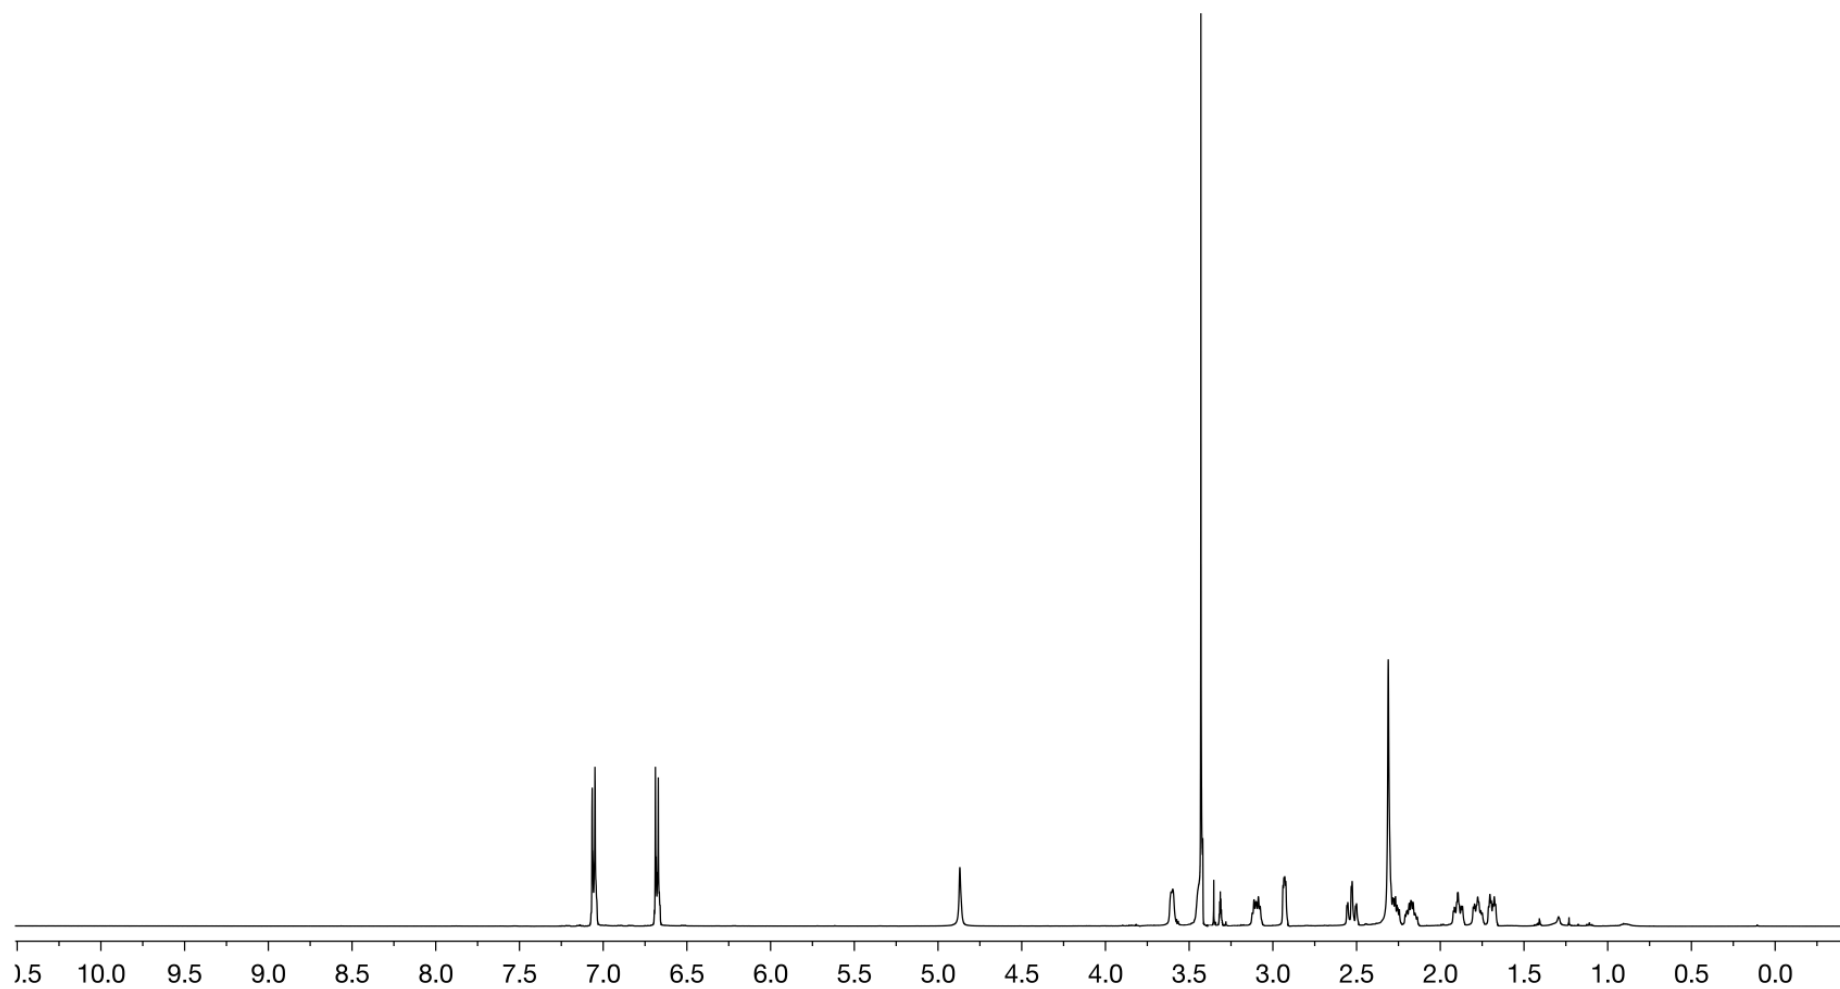

$^{13}\text{C}$  NMR of Methyl (1*R*,2*S*,3*S*,5*S*)-3-(4-hydroxyphenyl)-8-methyl-8-azabicyclo[3.2.1]octane-2-carboxylate (**3**):

125 MHz,  $\text{CD}_3\text{OD}$ , 23 °C

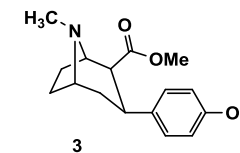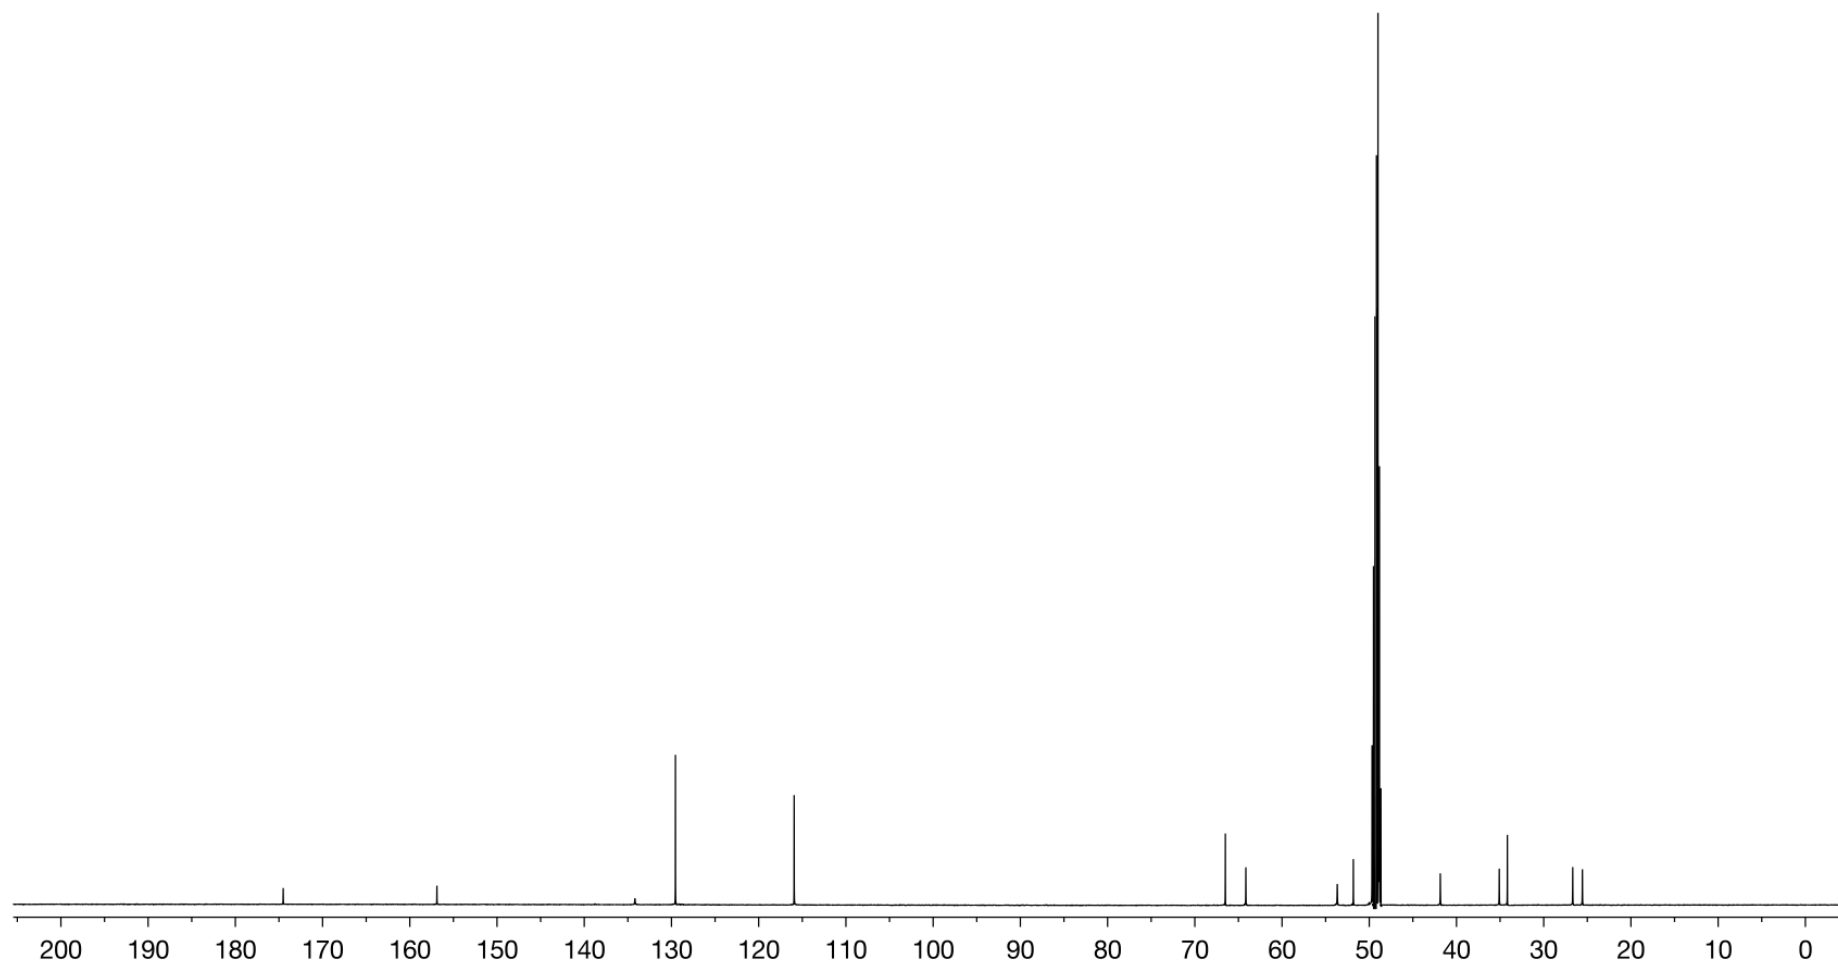

$^1\text{H}$  NMR of Methyl (1*R*,2*S*,3*R*,5*S*)-3-(4-hydroxyphenyl)-8-methyl-8-azabicyclo[3.2.1]octane-2-carboxylate (**S4**):

500 MHz,  $\text{CD}_3\text{OD}$ , 23 °C

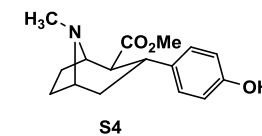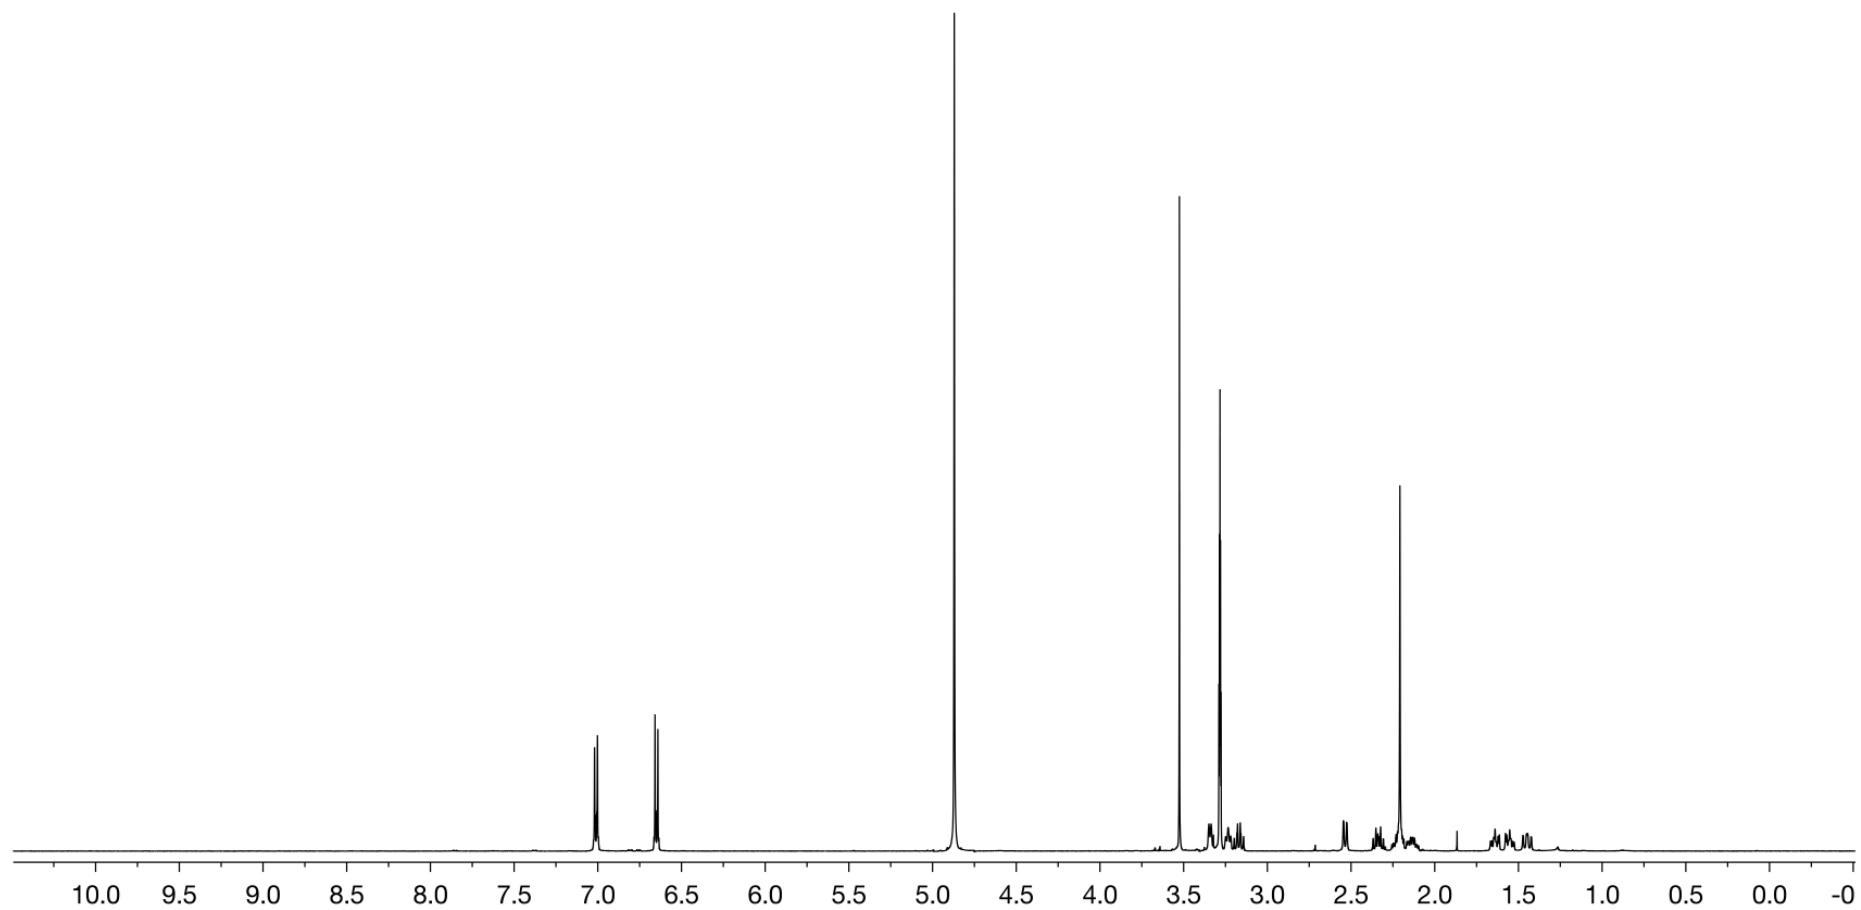

$^{13}\text{C}$  NMR of Methyl (1*R*,2*S*,3*R*,5*S*)-3-(4-hydroxyphenyl)-8-methyl-8-azabicyclo[3.2.1]octane-2-carboxylate (**S4**):

125 MHz,  $\text{CD}_3\text{OD}$ , 23 °C

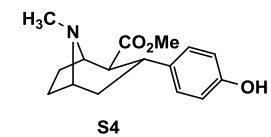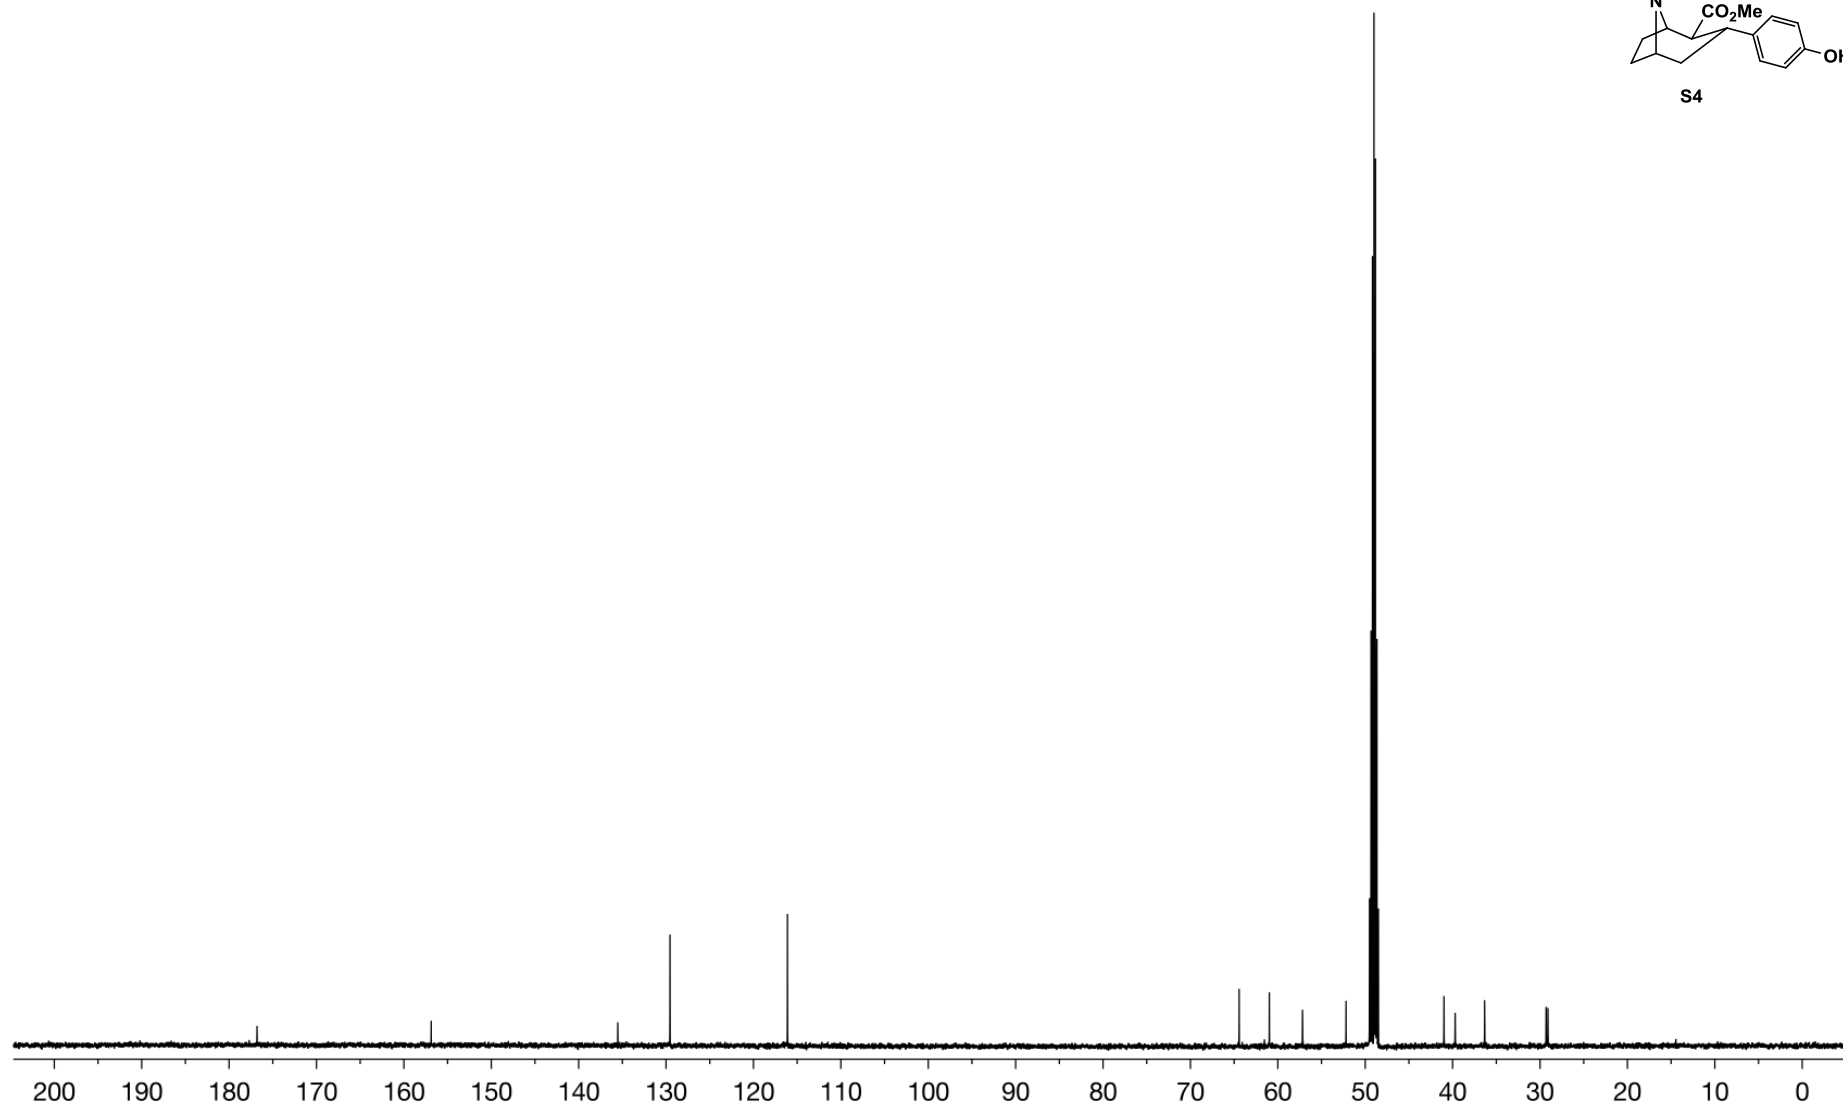

$^1\text{H}$  NMR *N*-(4-Hydroxyphenyl)benzamide (**S5**)

500 MHz,  $\text{CD}_3\text{OD}$ , 23 °C

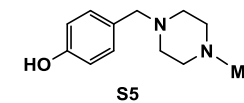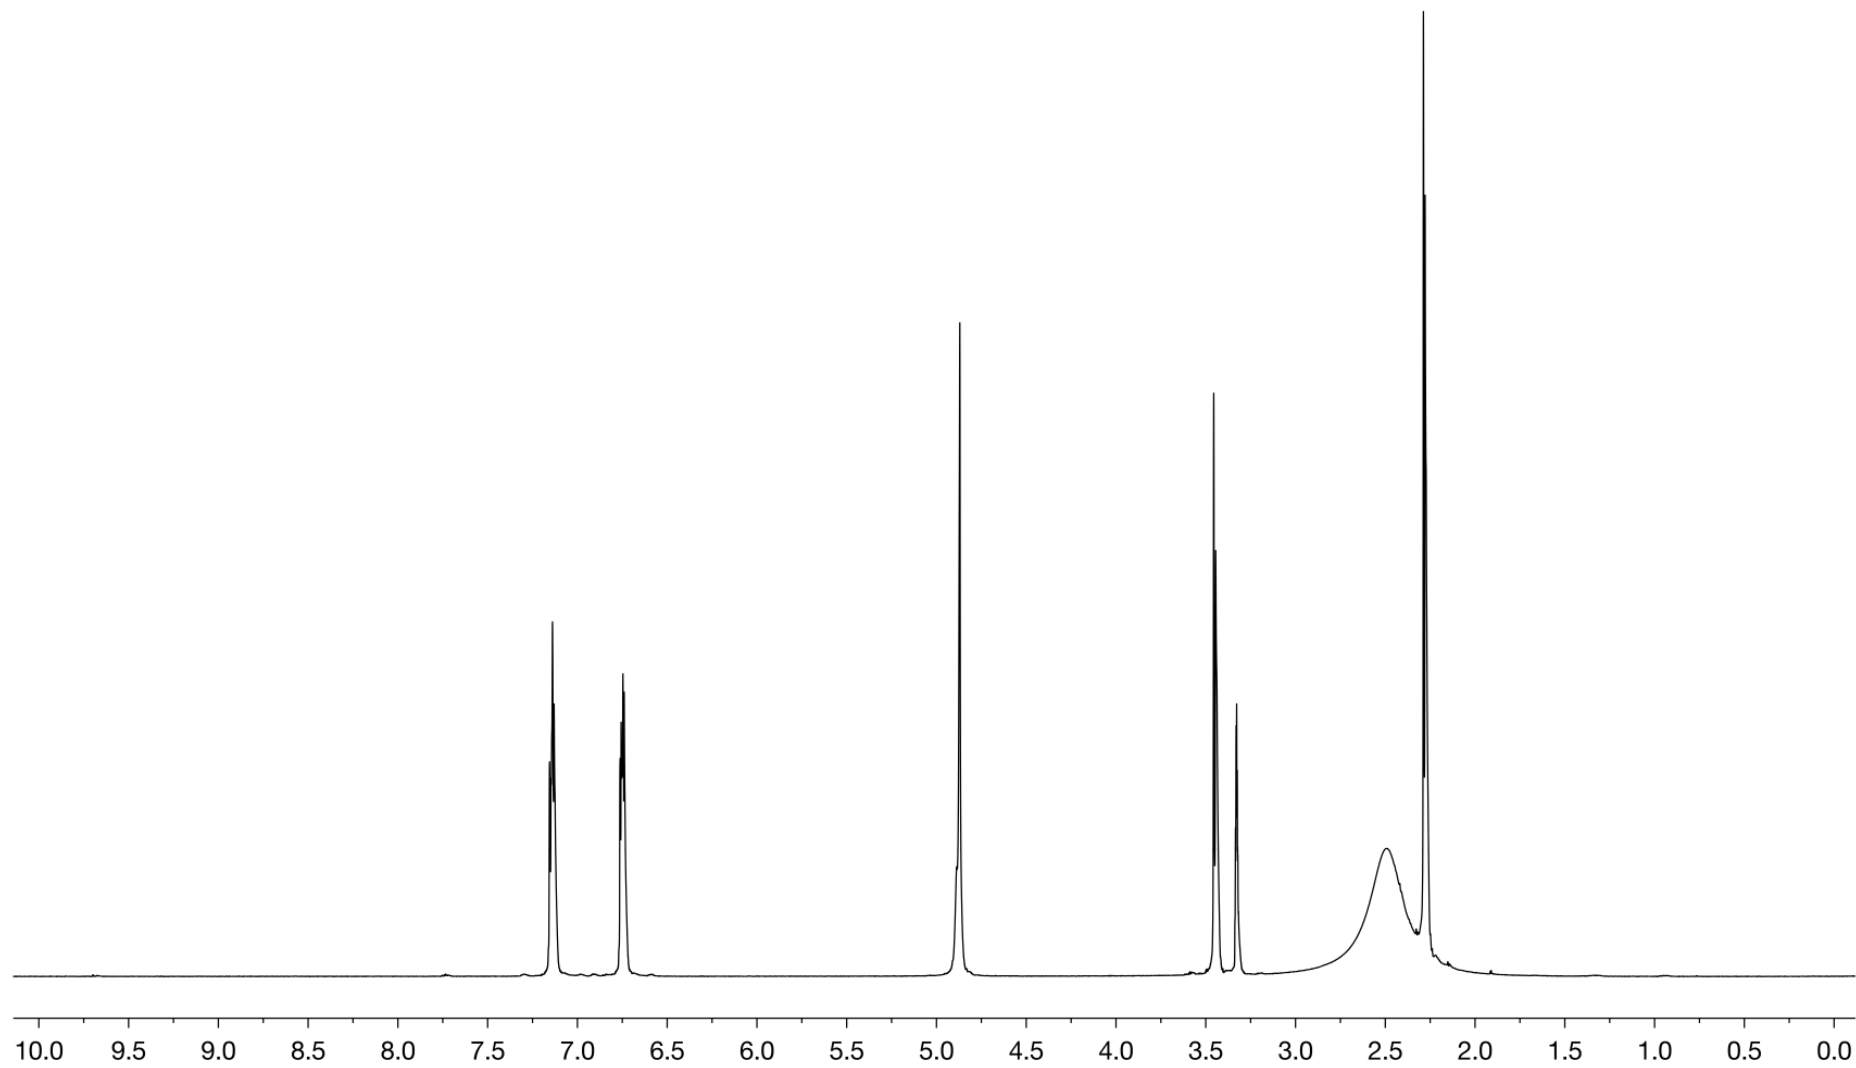



$^{13}\text{C}$  NMR *N*-(4-Hydroxyphenyl)benzamide (**S5**):

125 MHz,  $\text{CD}_3\text{OD}$ , 23 °C

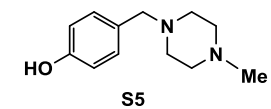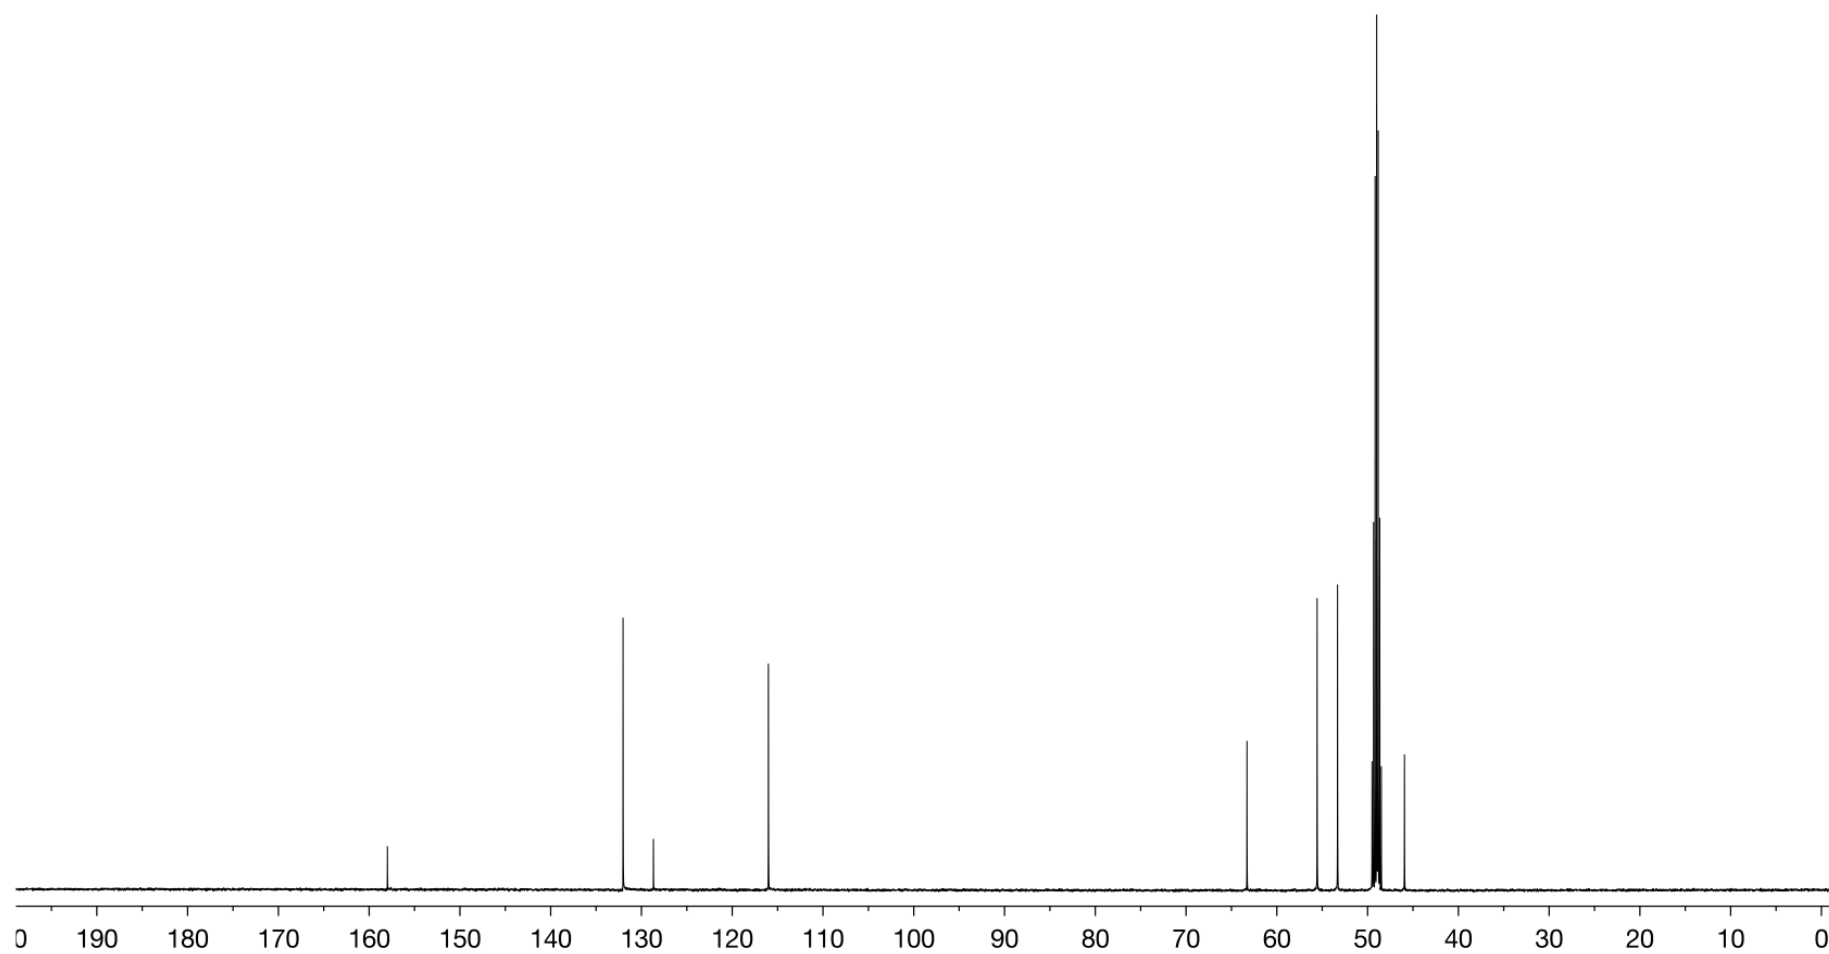

$^1\text{H}$  NMR of 2-((2,4-dinitrophenyl)thio)-4-methoxyaniline (**S6**):

500 MHz,  $\text{CDCl}_3$ , 23  $^\circ\text{C}$

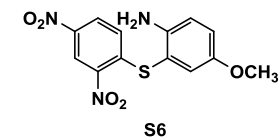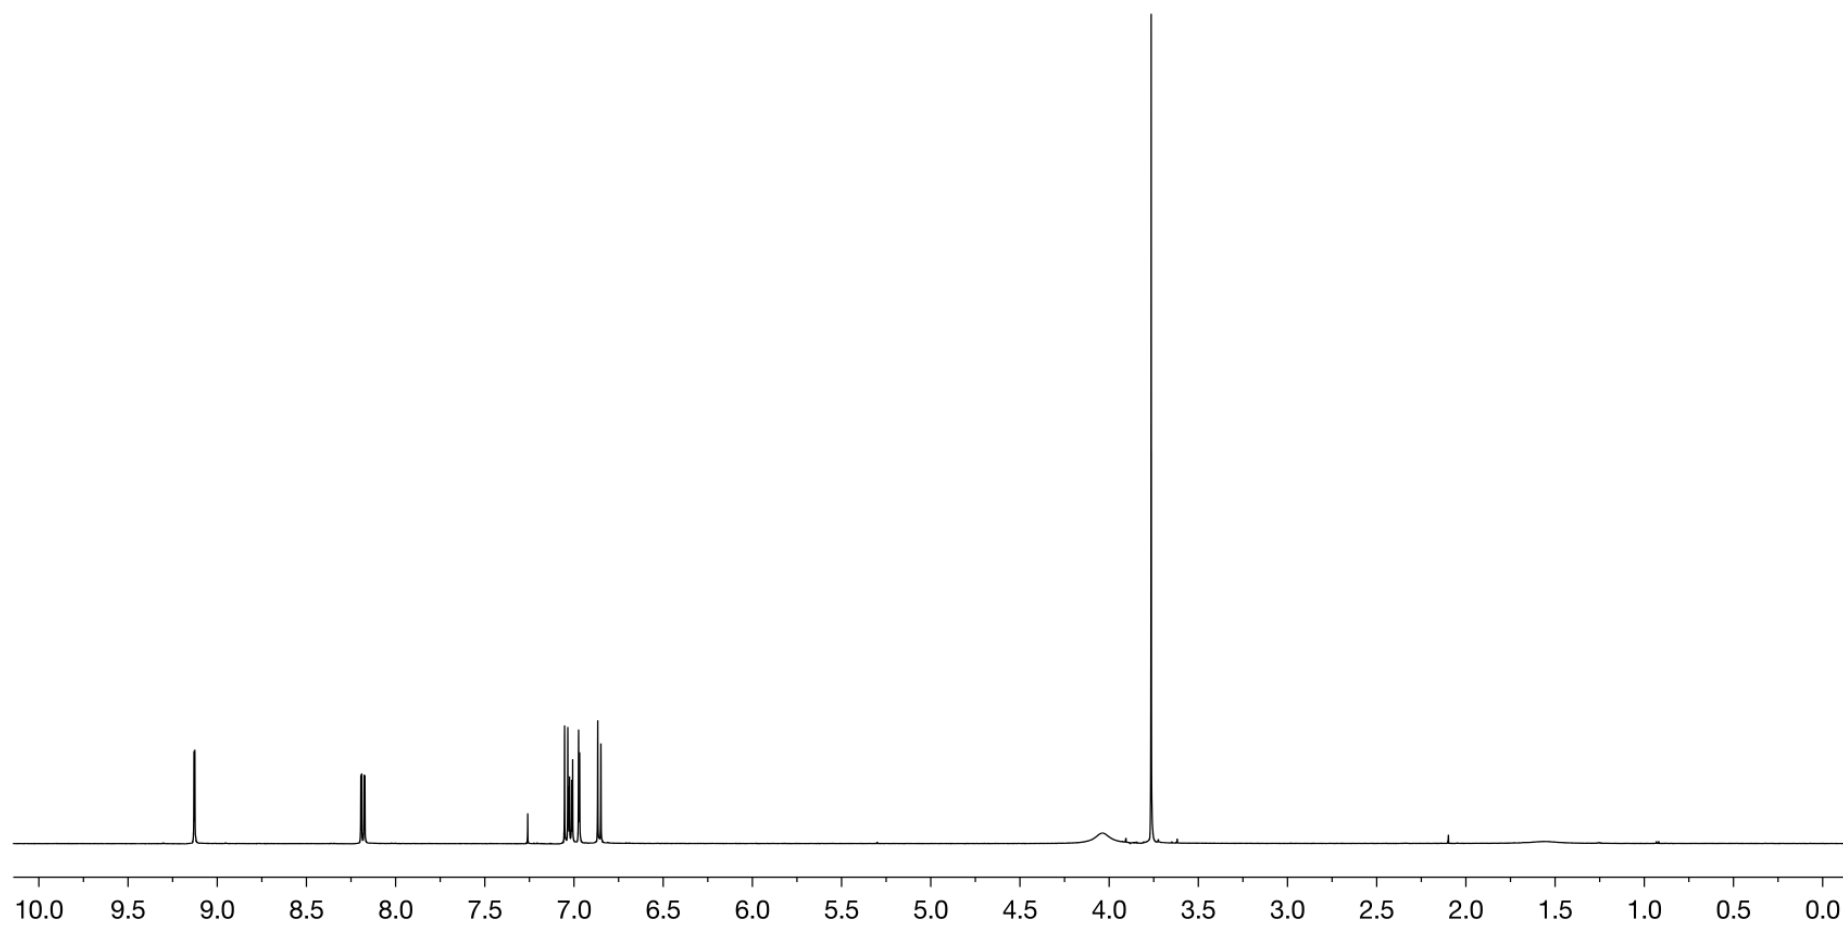

$^{13}\text{C}$  NMR of 2-((2,4-dinitrophenyl)thio)-4-methoxyaniline (**S6**):

125 MHz,  $\text{CDCl}_3$ , 23 °C

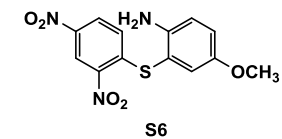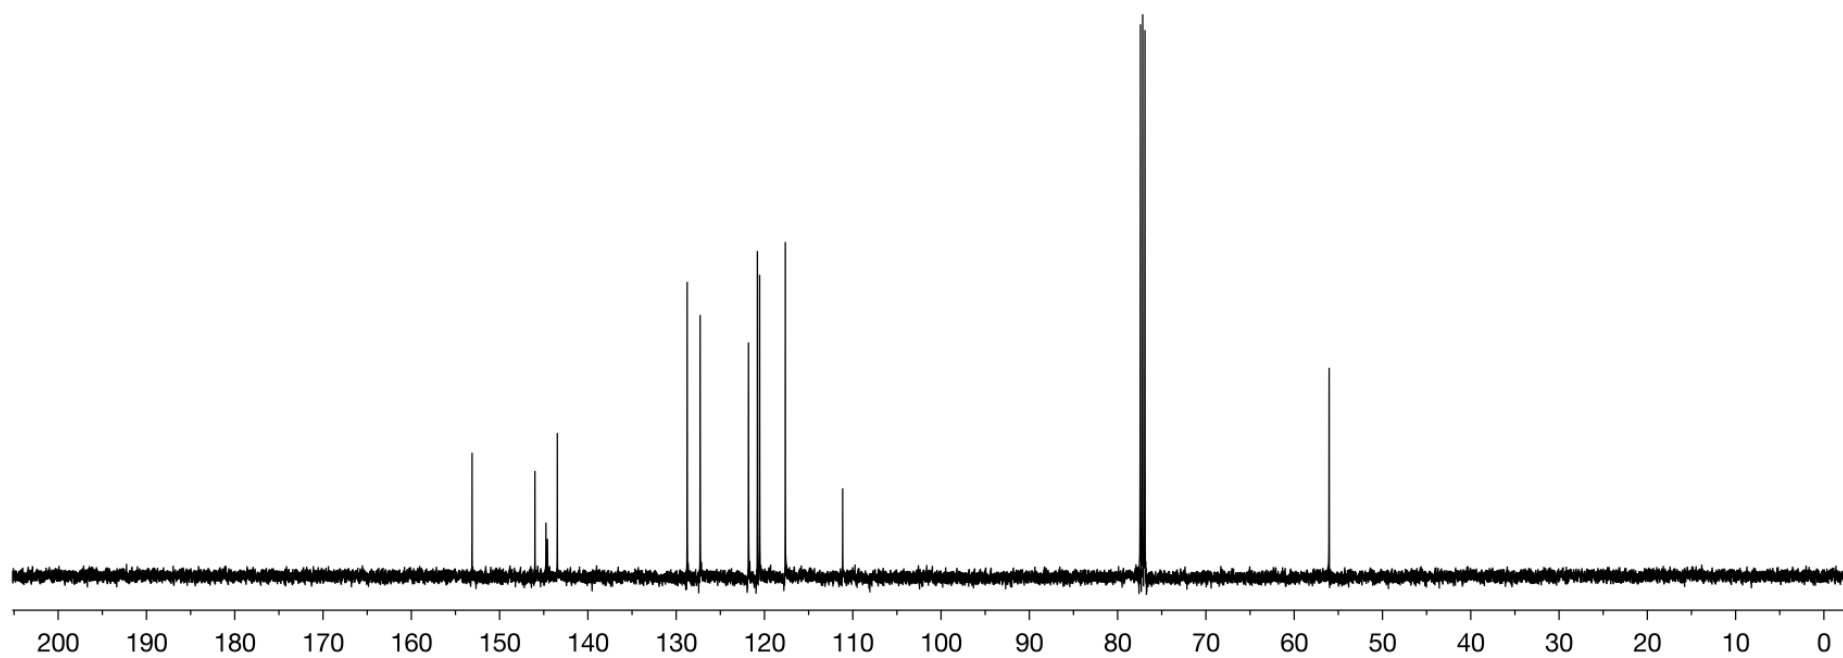

$^1\text{H}$  NMR of *N*-(2-((2,4-dinitrophenyl)thio)-4-methoxyphenyl)acetamide (**S7**):

500 MHz,  $\text{CDCl}_3$ , 23  $^\circ\text{C}$

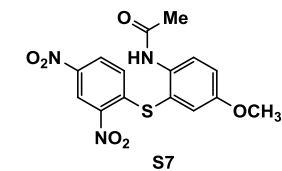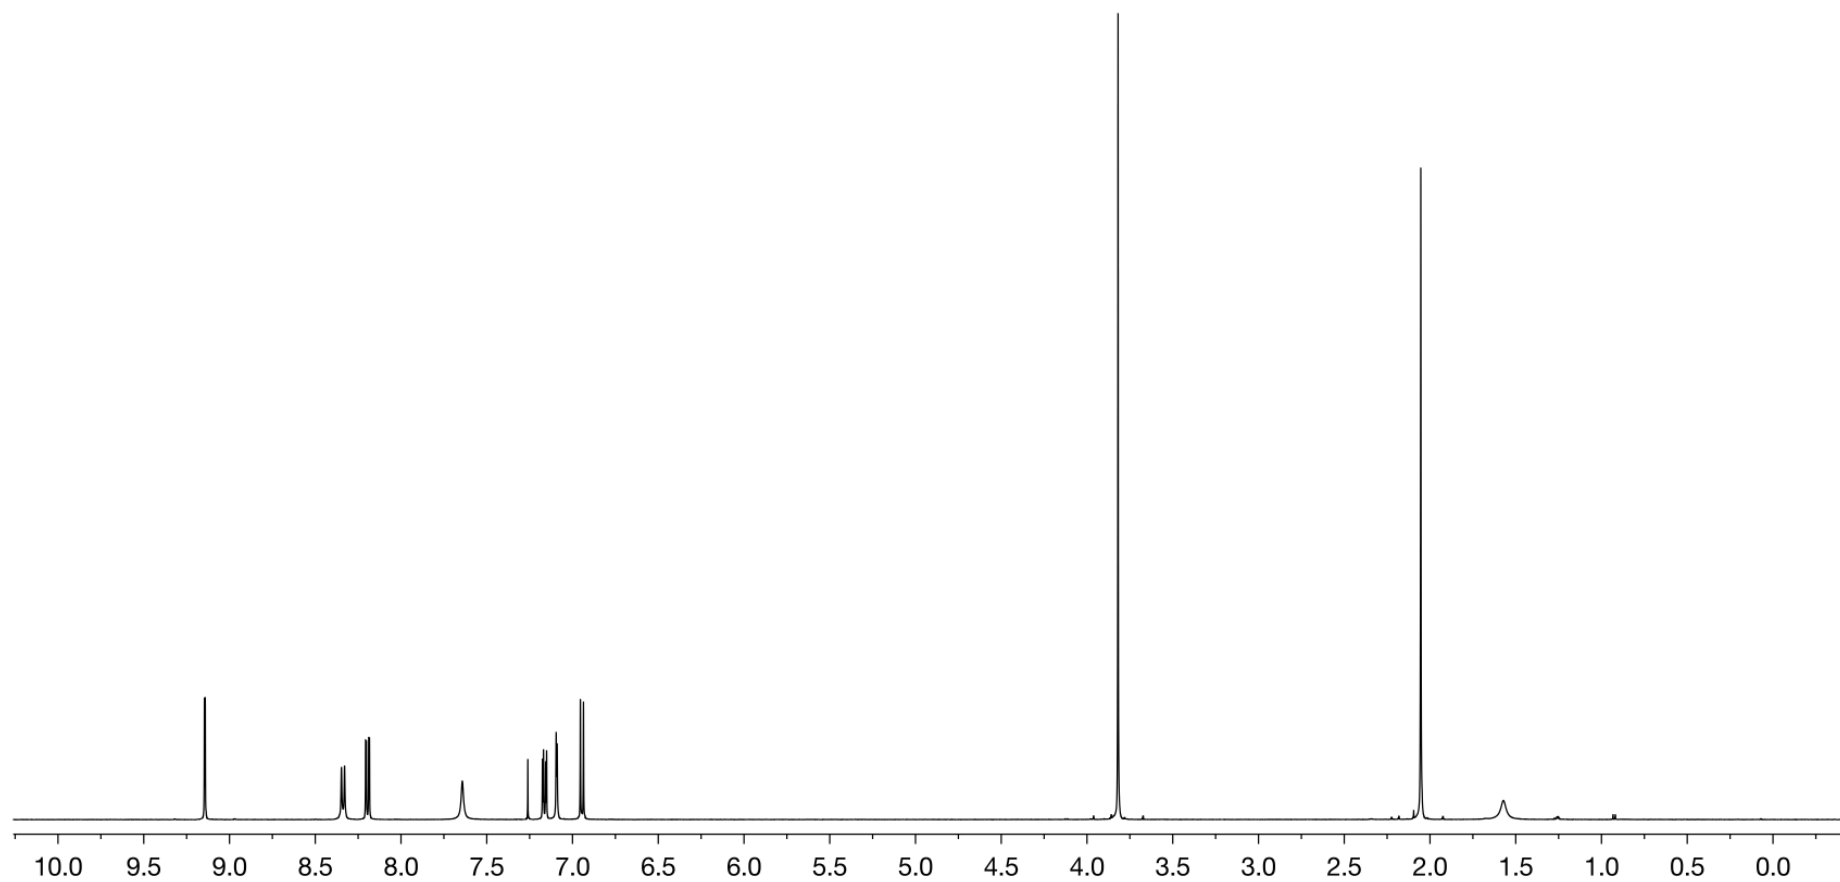

$^{13}\text{C}$  NMR of *N*-(2-((2,4-dinitrophenyl)thio)-4-methoxyphenyl)acetamide (**S7**):

125 MHz,  $\text{CDCl}_3$ , 23 °C

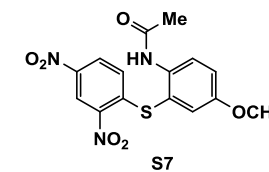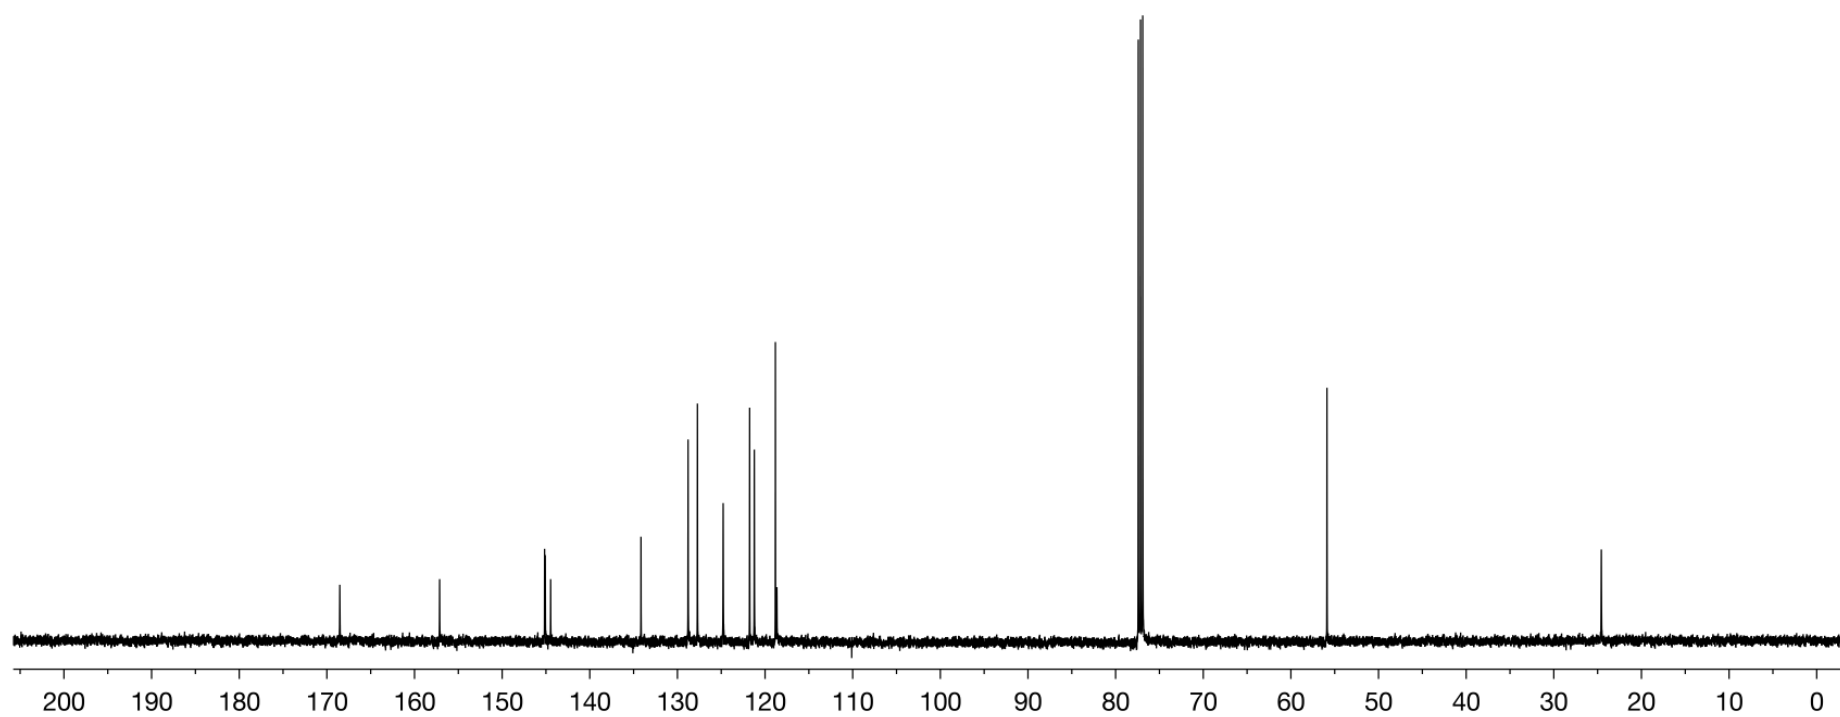

$^1\text{H}$  NMR of 3-methoxy-7-nitro-10*H*-phenothiazine (**S8**):

500 MHz, DMSO- $d_6$ , 23 °C

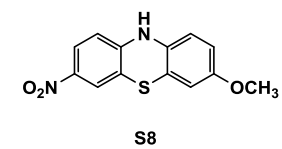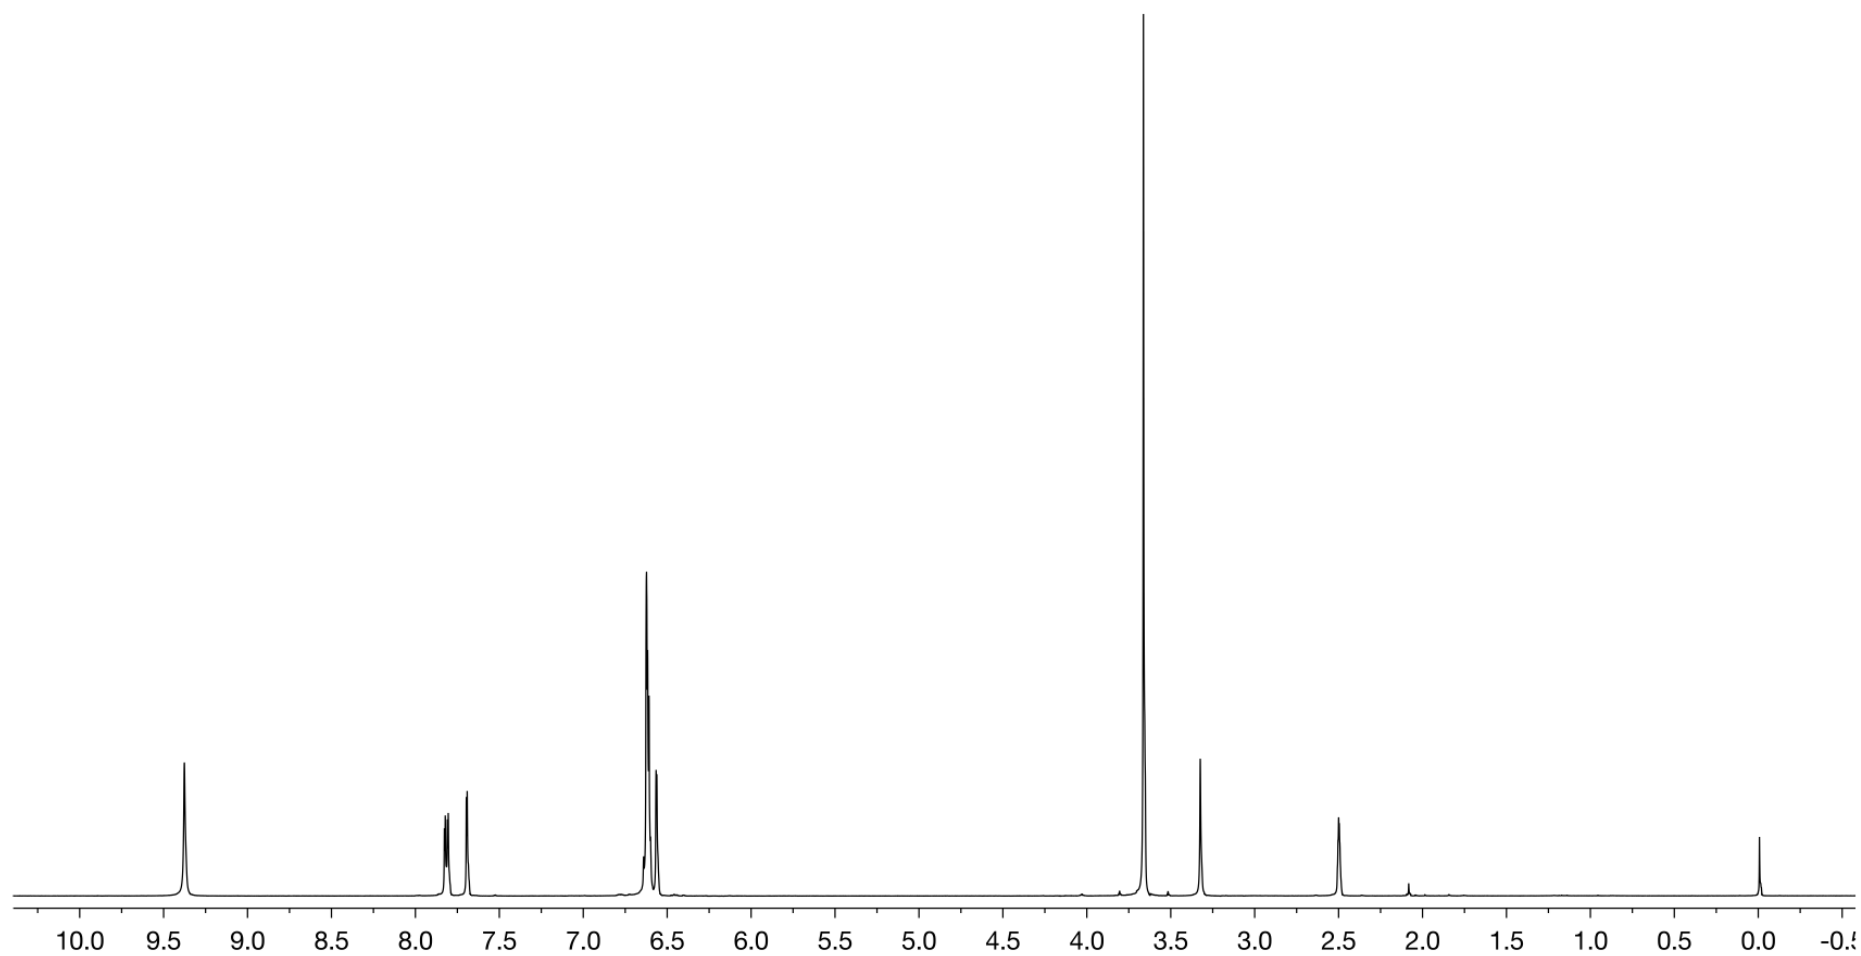

$^{13}\text{C}$  NMR of 3-methoxy-7-nitro-10*H*-phenothiazine (**S8**):

125 MHz,  $\text{DMSO-}d_6$ , 23 °C

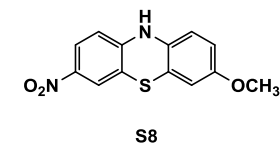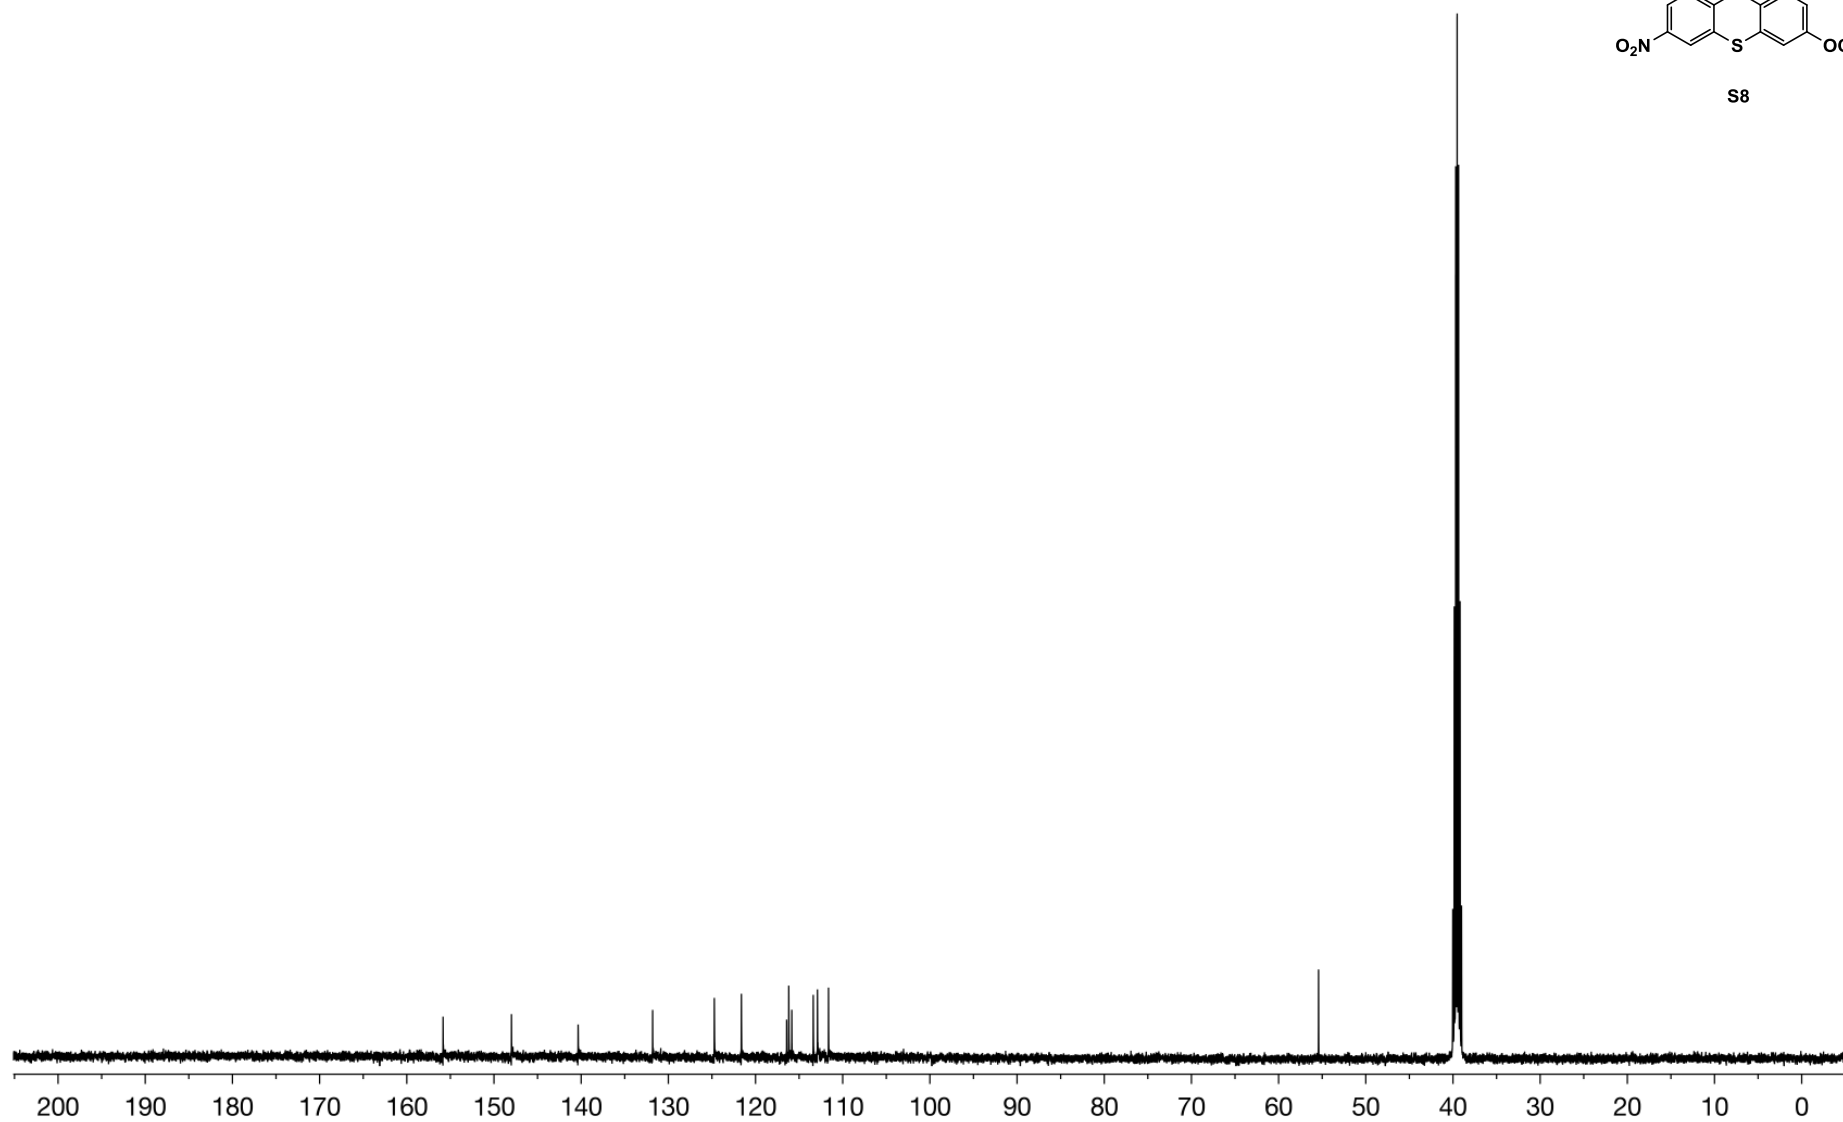

$^1\text{H}$  NMR of 1-(3-methoxy-7-nitro-10*H*-phenothiazin-10-yl)ethan-1-one (**S9**):

500 MHz,  $\text{CDCl}_3$ , 23  $^\circ\text{C}$

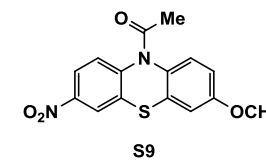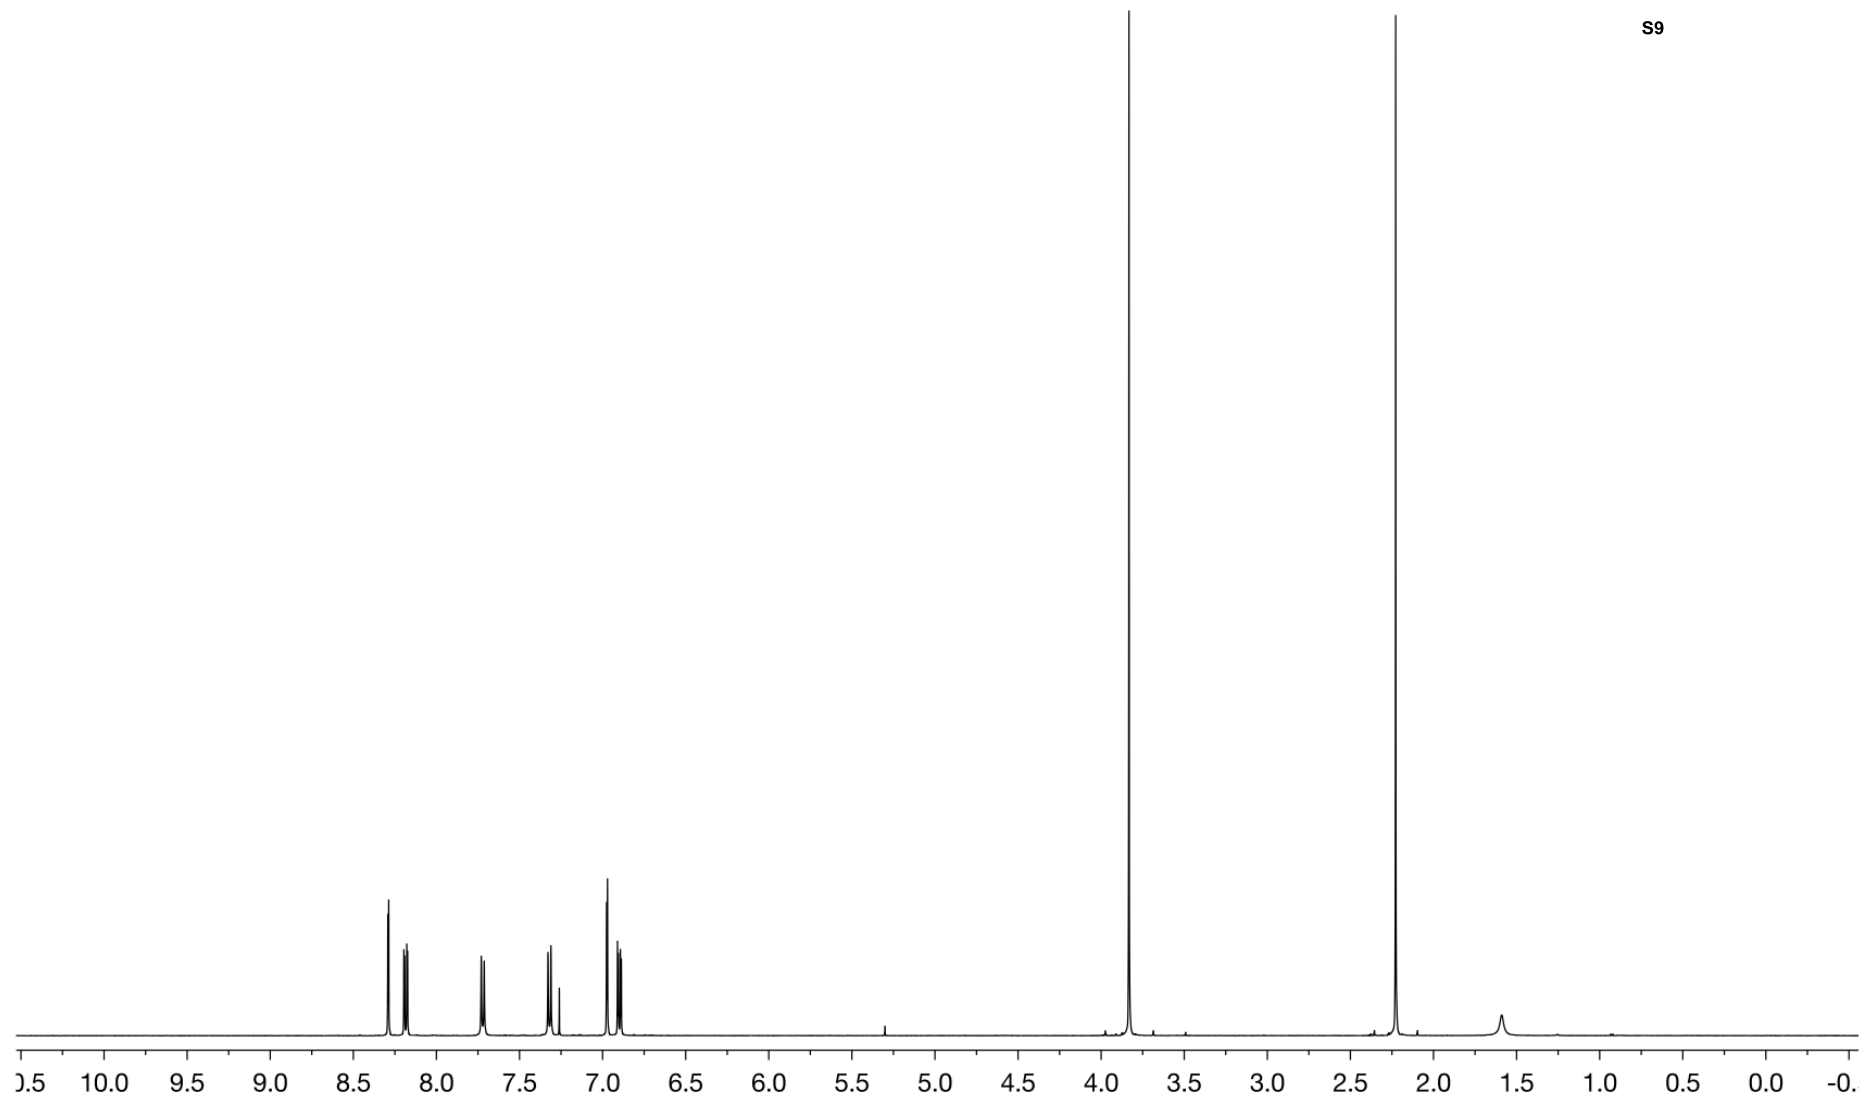



$^{13}\text{C}$  NMR of 1-(3-hydroxy-7-nitro-10*H*-phenothiazin-10-yl)ethan-1-one (**S9**):

125 MHz,  $\text{DMSO-}d_6$ , 23 °C

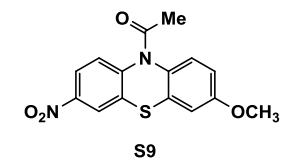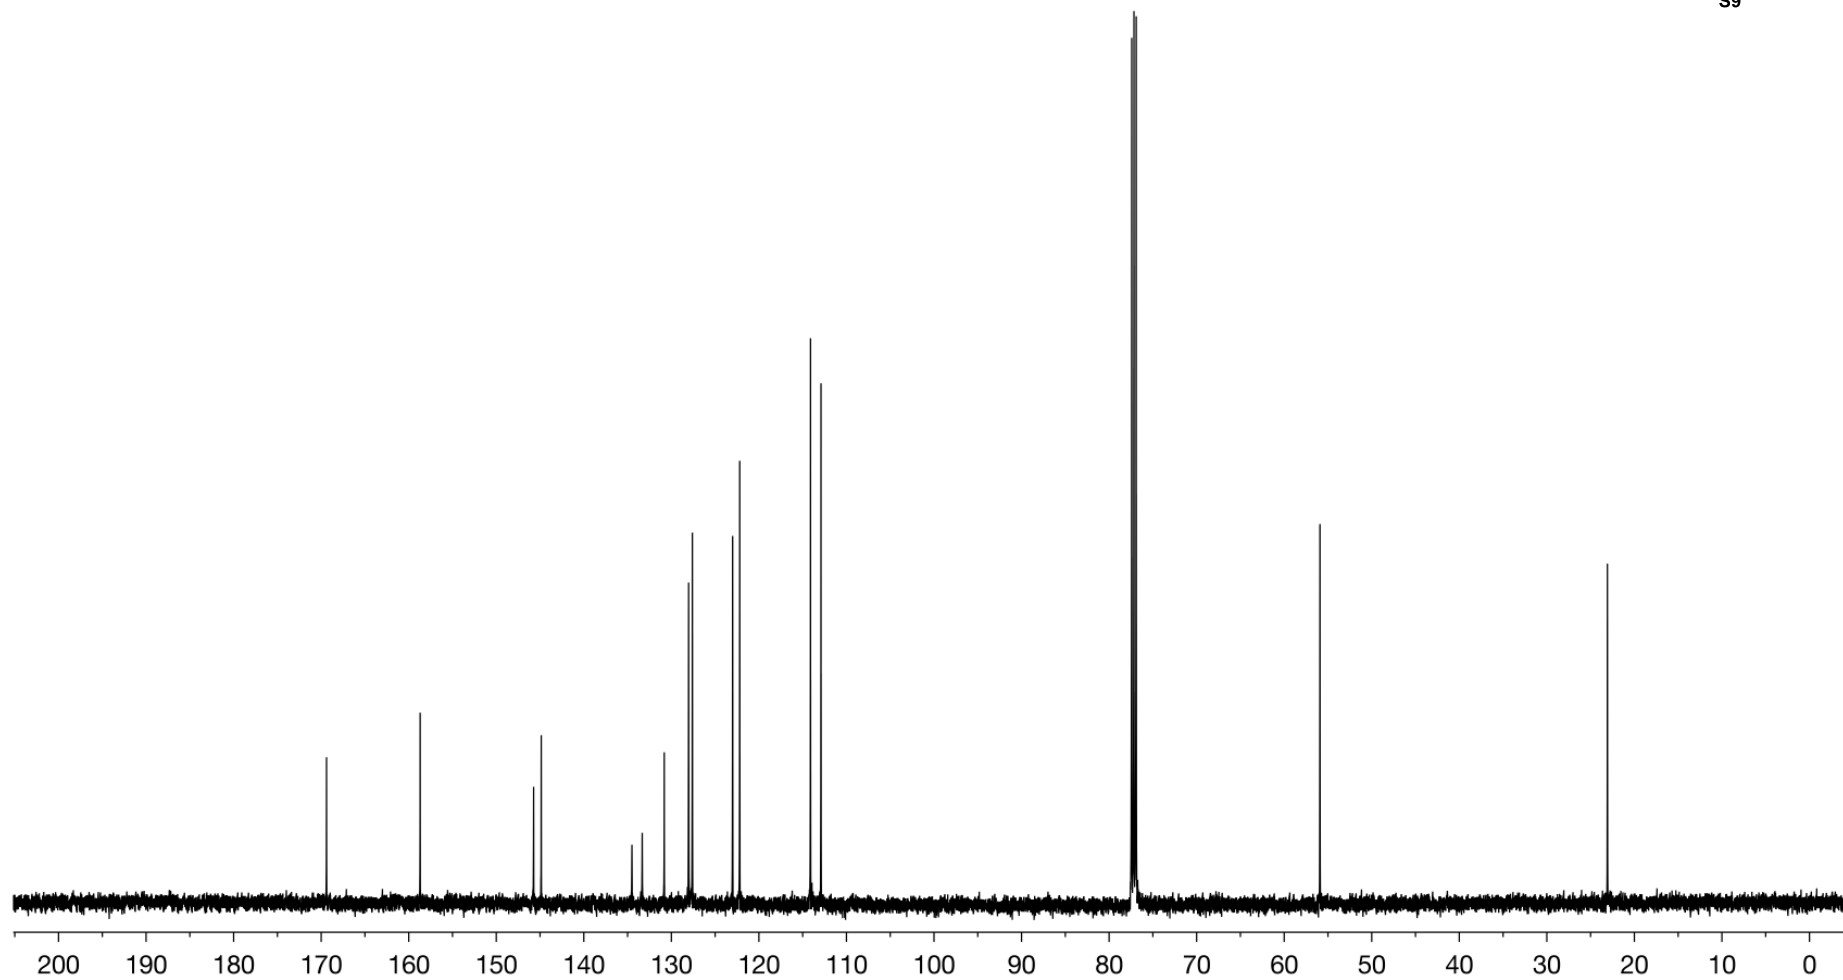

$^1\text{H}$  NMR of 1-(3-hydroxy-7-nitro-10*H*-phenothiazin-10-yl)ethan-1-one (**S10**):

500 MHz,  $\text{DMSO-}d_6$ , 23 °C

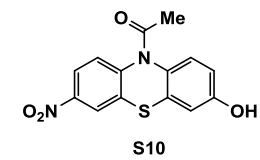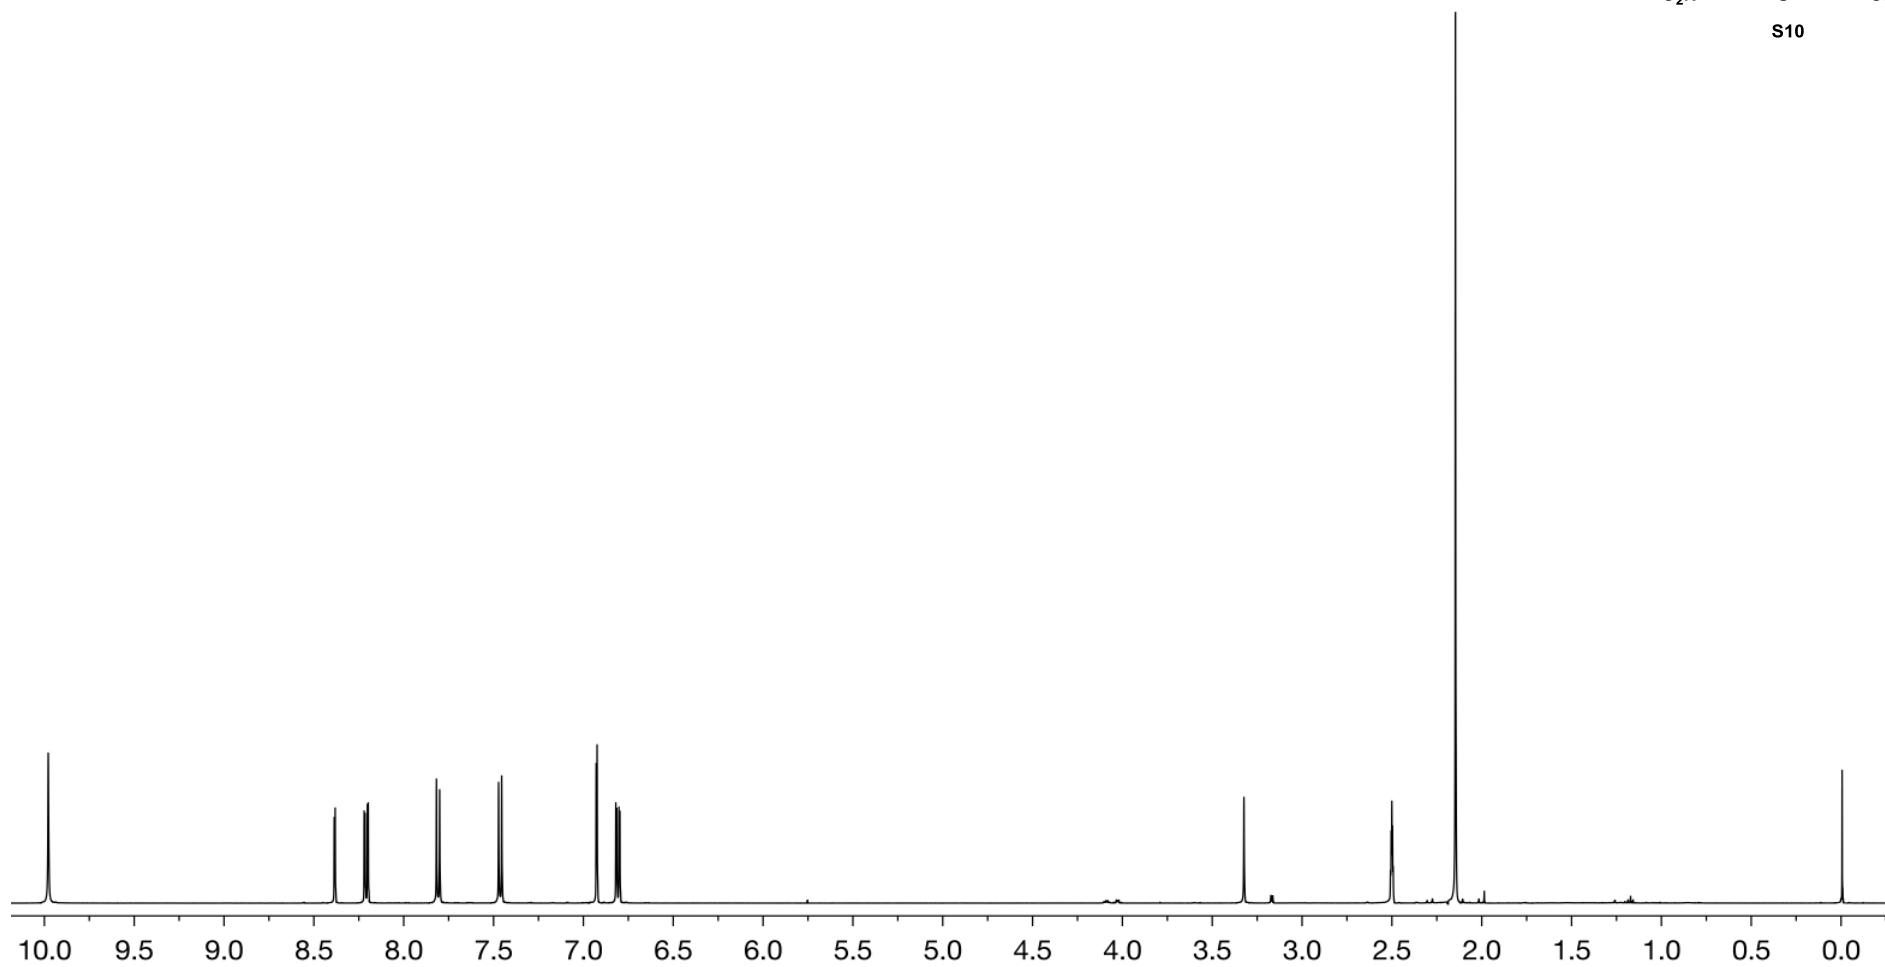

$^{13}\text{C}$  NMR of 1-(3-hydroxy-7-nitro-10*H*-phenothiazin-10-yl)ethan-1-one (**S10**):

125 MHz, DMSO-*d*<sub>6</sub>, 23 °C

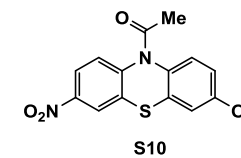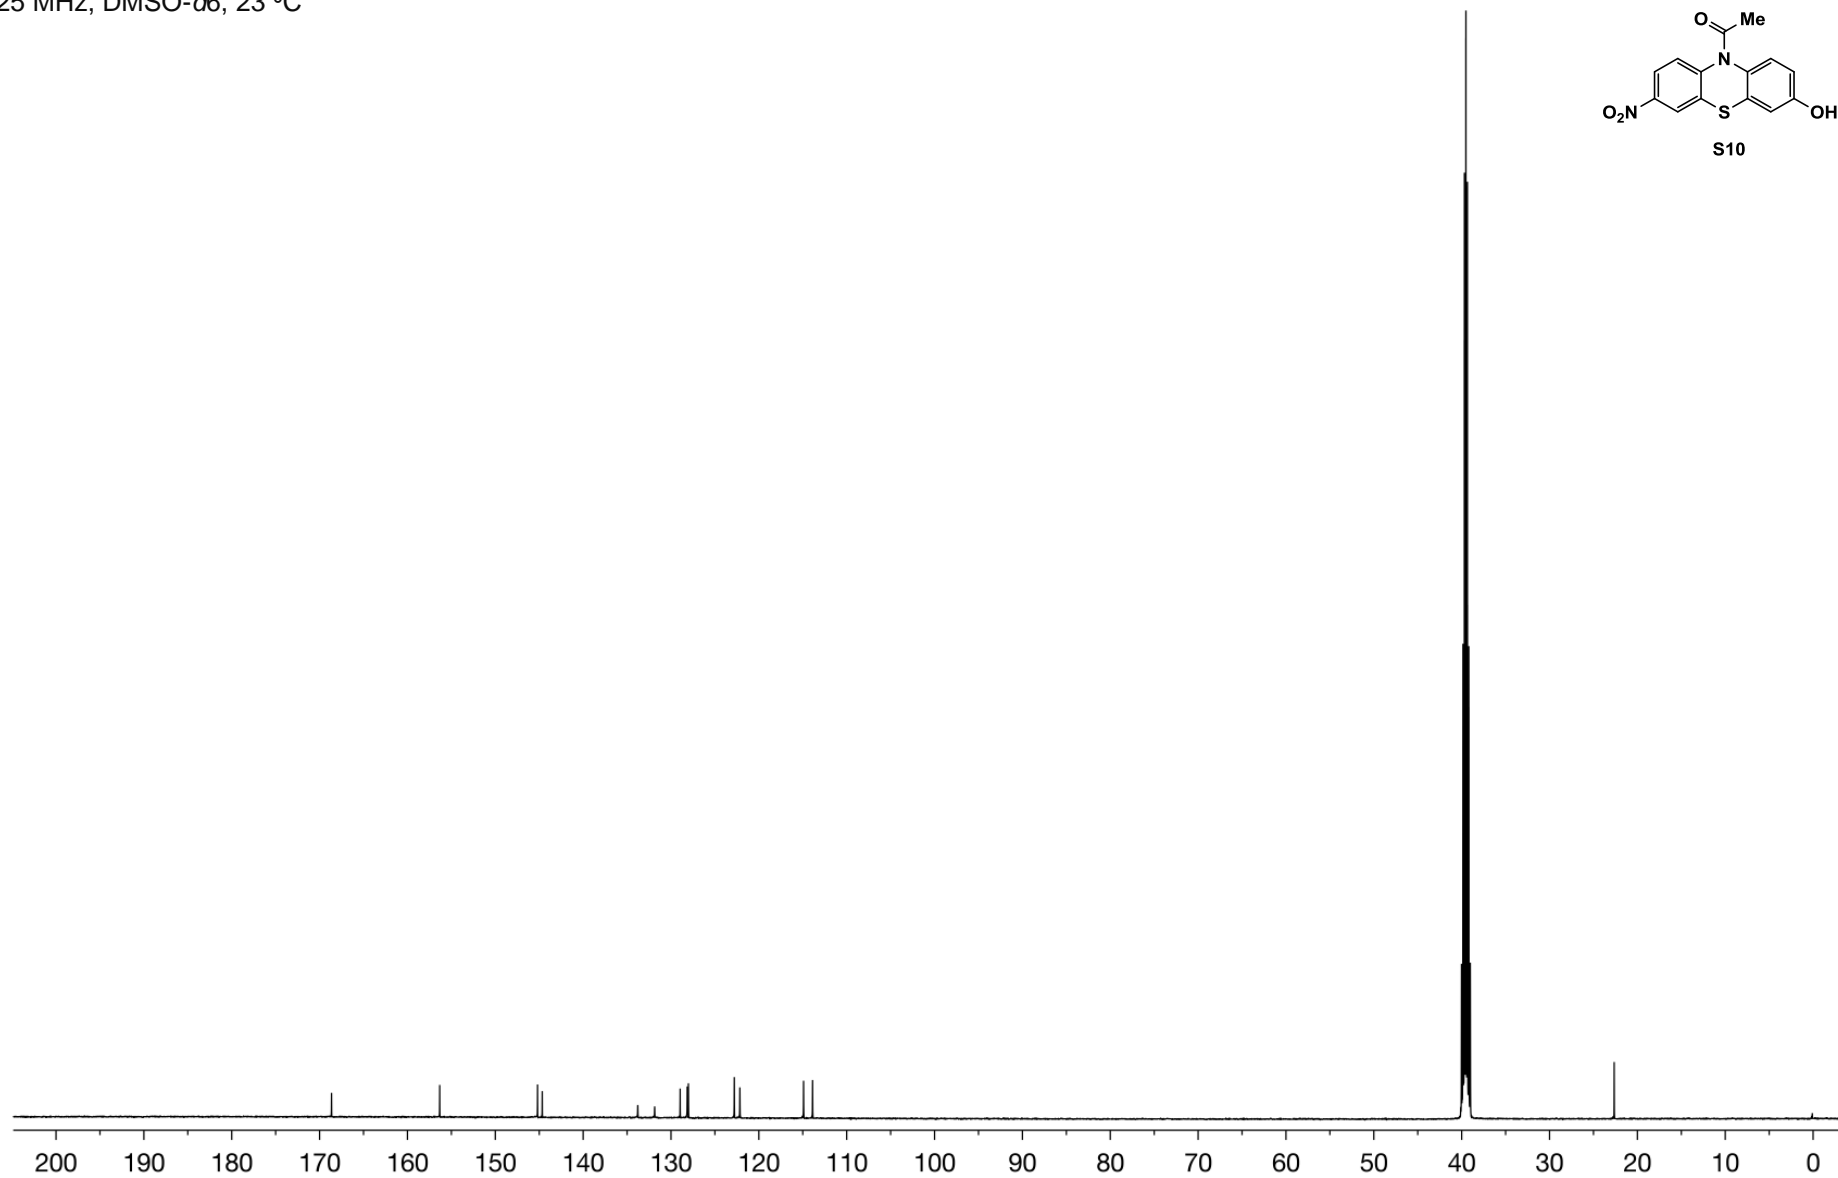

$^1\text{H}$  NMR *N*-(4-Hydroxyphenyl)benzamide (**S11**):

500 MHz,  $\text{CD}_3\text{OD}$ , 23 °C

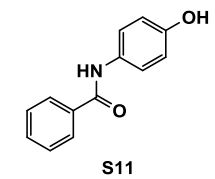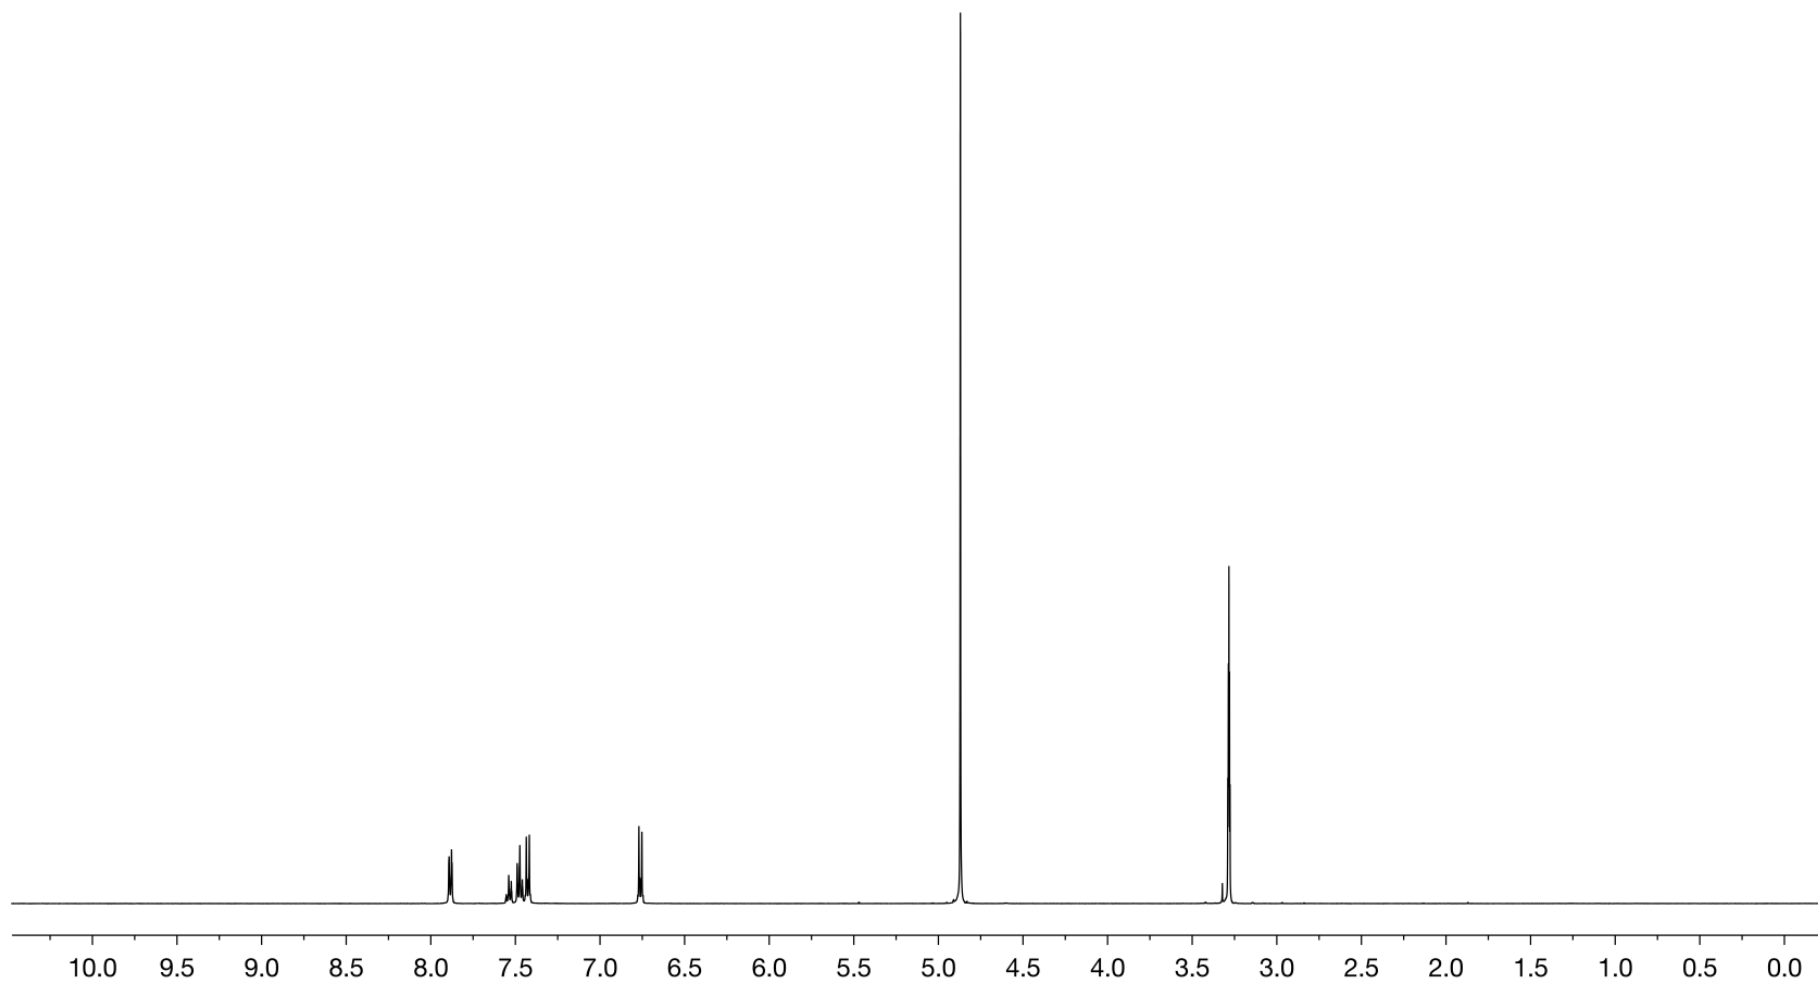

$^{13}\text{C}$  NMR *N*-(4-Hydroxyphenyl)benzamide (**S11**):

125 MHz,  $\text{CD}_3\text{OD}$ , 23 °C

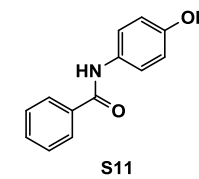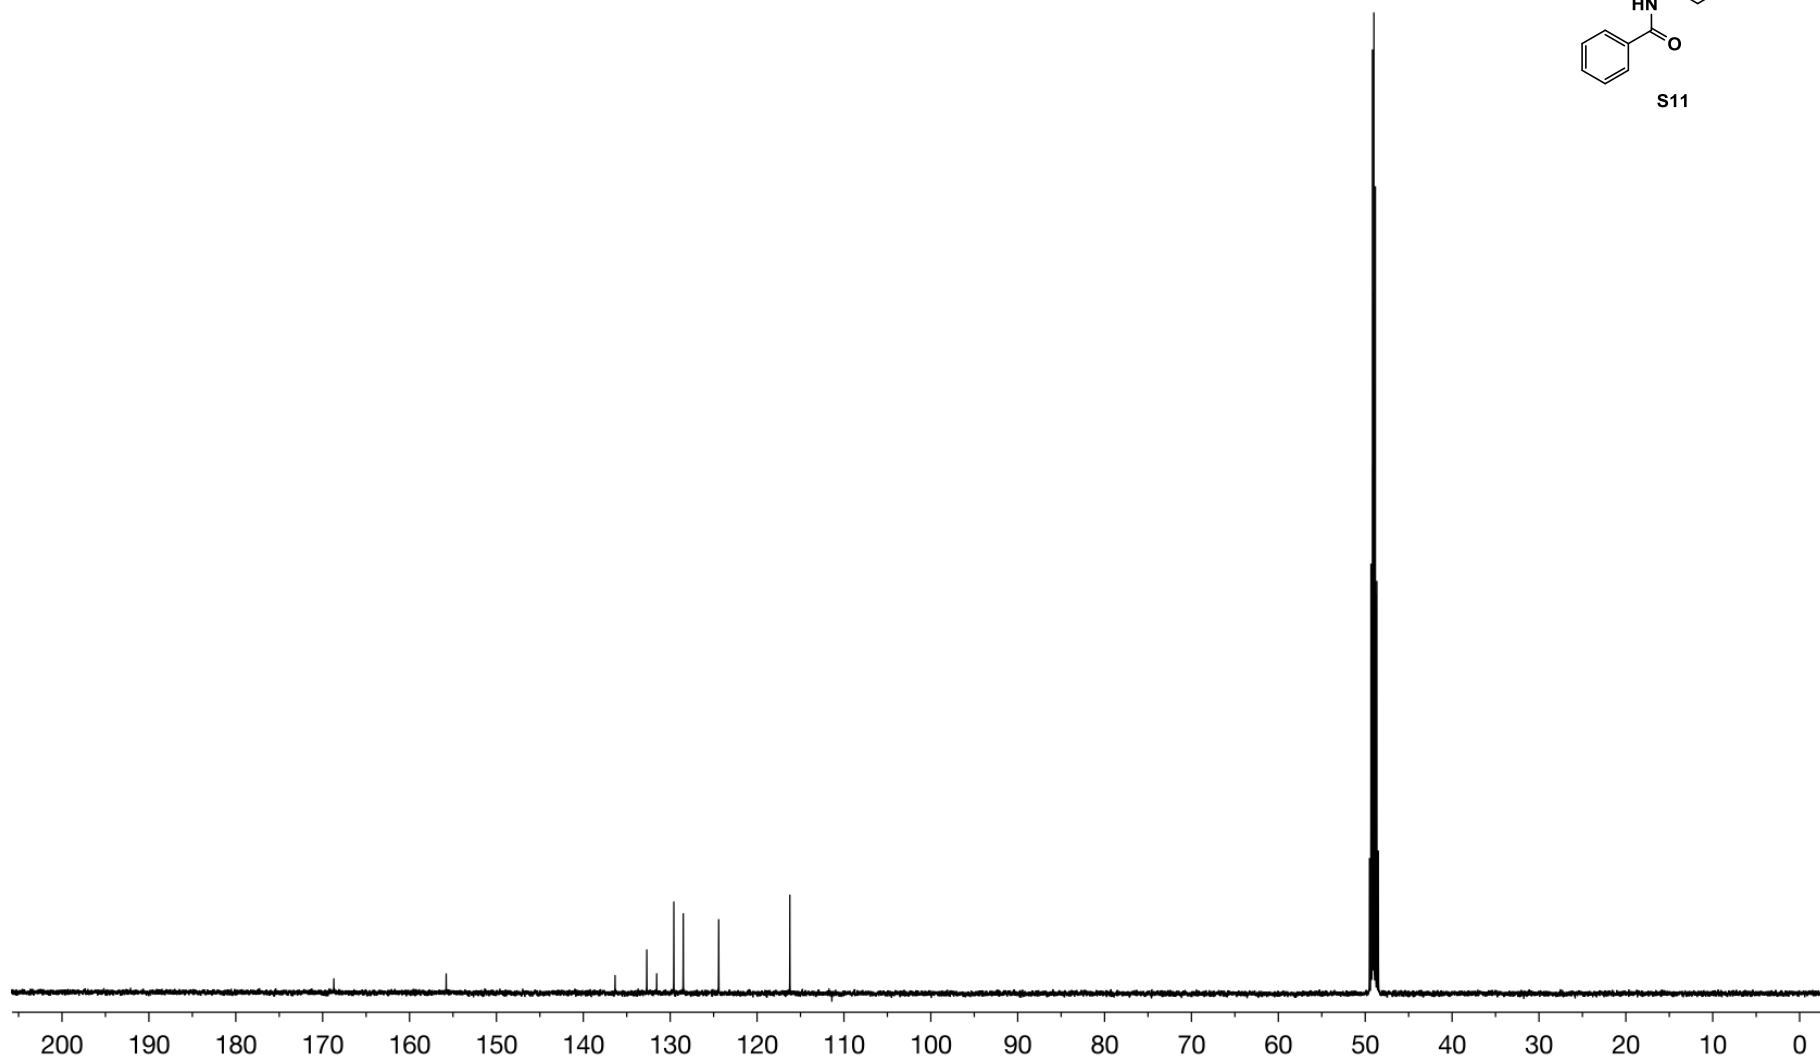

$^1\text{H}$  NMR of *tert*-butyl ((*S*)-1-(((2*S*,3*S*,4*R*,5*R*)-5-(6-(dimethylamino)-9*H*-purin-9-yl)-4-hydroxy-2-(hydroxymethyl)tetrahydrofuran-3-yl)amino)-3-(4-hydroxyphenyl)-1-oxopropan-2-yl)carbamate (**S13**):

500 MHz,  $\text{CD}_2\text{Cl}_2:\text{CD}_3\text{OD}$  (1:1), 23 °C

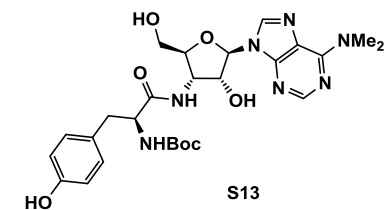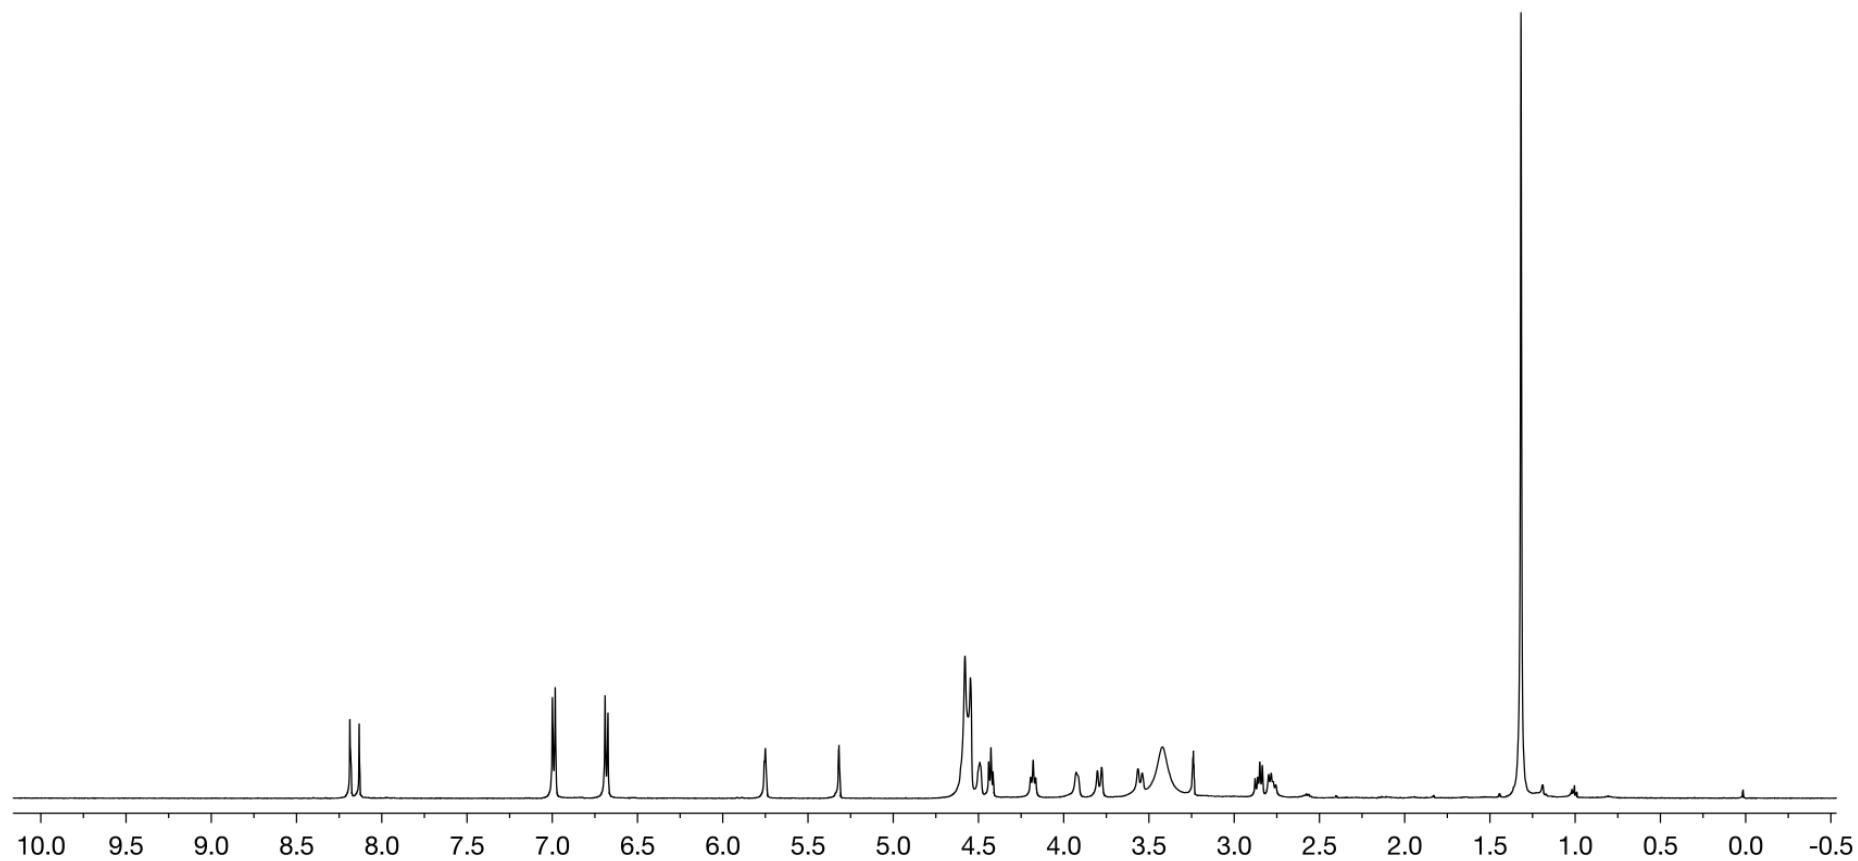

$^{13}\text{C}$  NMR of *tert*-butyl ((*S*)-1-(((2*S*,3*S*,4*R*,5*R*)-5-(6-(dimethylamino)-9*H*-purin-9-yl)-4-hydroxy-2-(hydroxymethyl)tetrahydrofuran-3-yl)amino)-3-(4-hydroxyphenyl)-1-oxopropan-2-yl)carbamate (**S13**):

125 MHz,  $\text{CD}_2\text{Cl}_2:\text{CD}_3\text{OD}$  (1:1), 23 °C

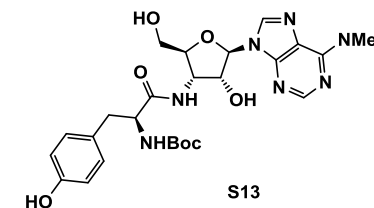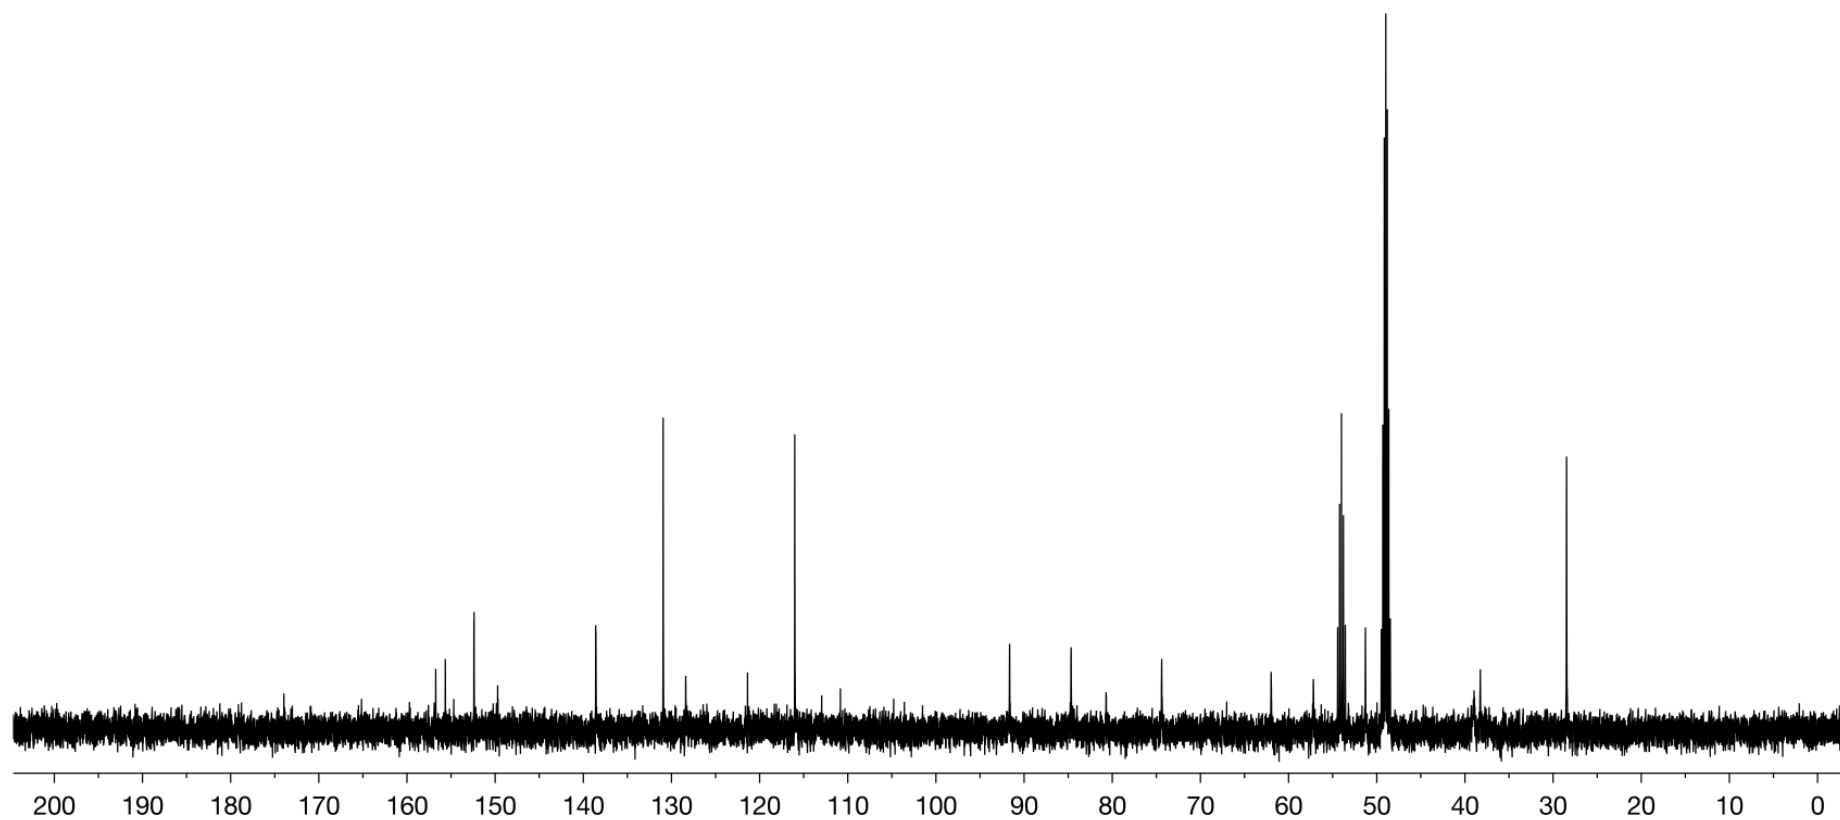

$^1\text{H}$  NMR of methyl acetyl-*L*-tyrosinate (**8**):

600 MHz,  $\text{CDCl}_3$ , 23 °C

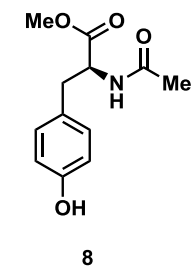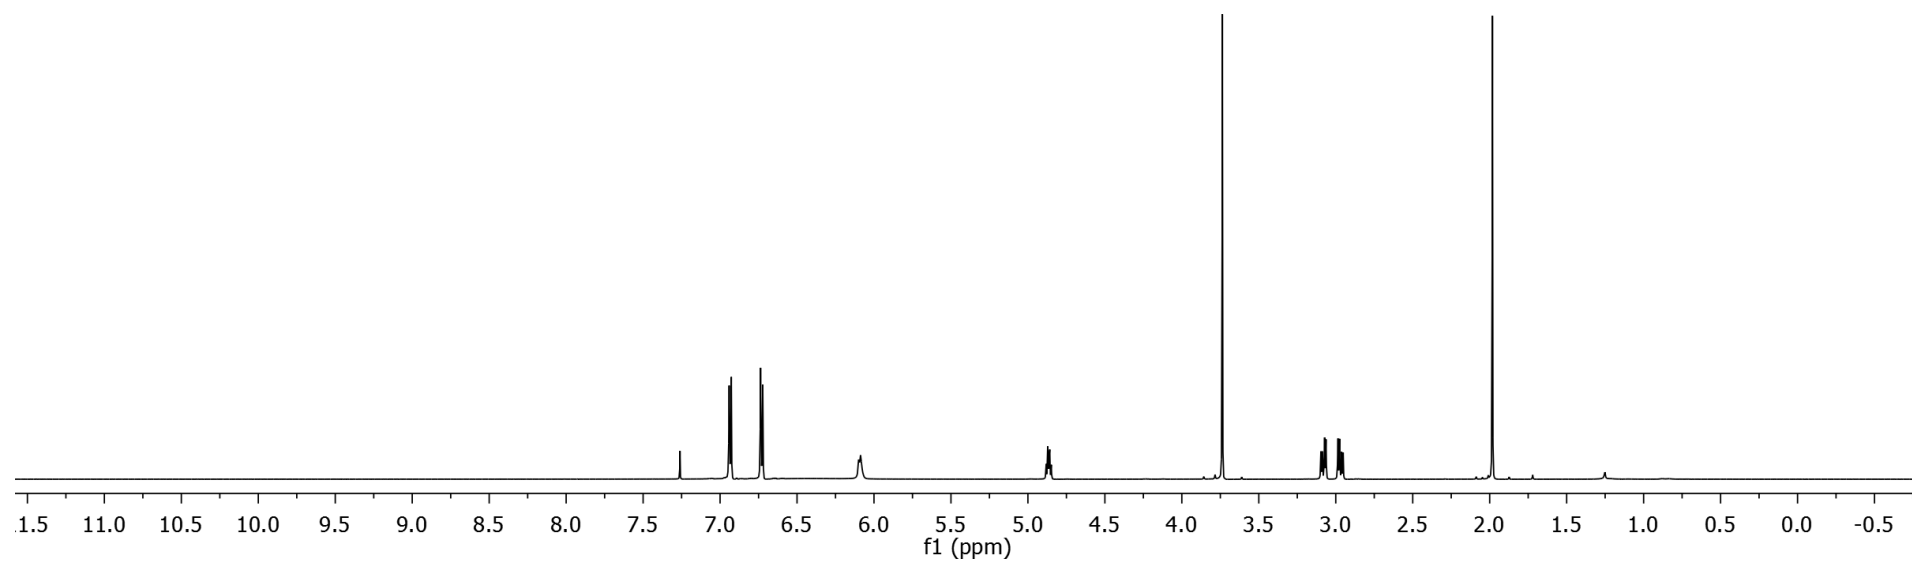



$^{13}\text{C}$  NMR of methyl acetyl-L-tyrosinate (**8**):

126 MHz,  $\text{CDCl}_3$ , 23 °C

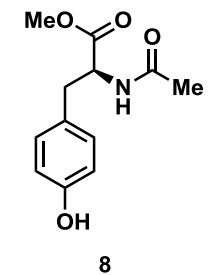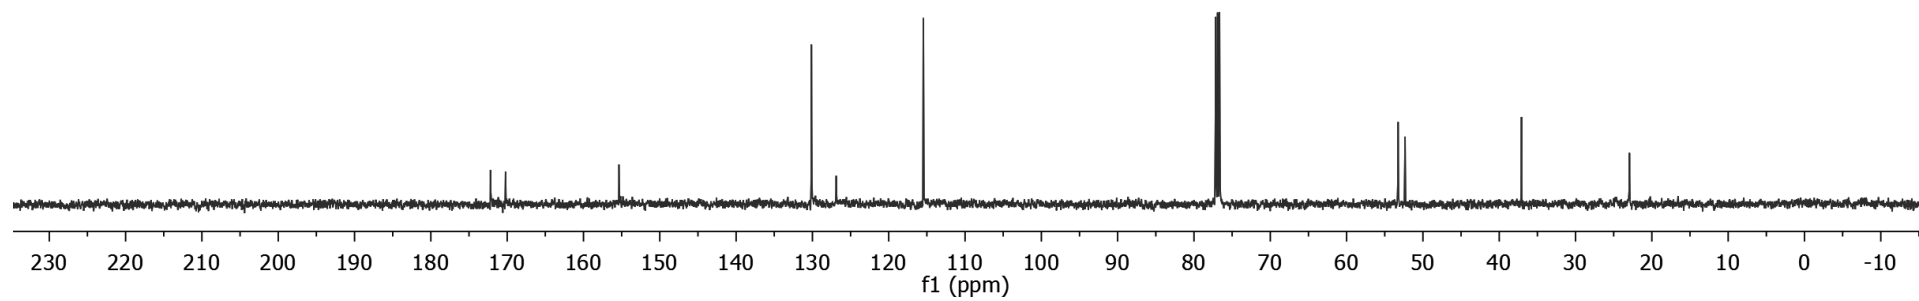

$^1\text{H}$  NMR of 1-(4-fluorobenzyl)-4-methylpiperazine ( $[^{19}\text{F}]\mathbf{7b}$ ):

500 MHz,  $\text{CD}_3\text{OD}$ , 23 °C

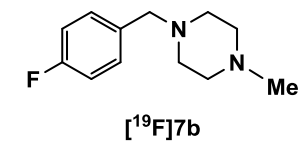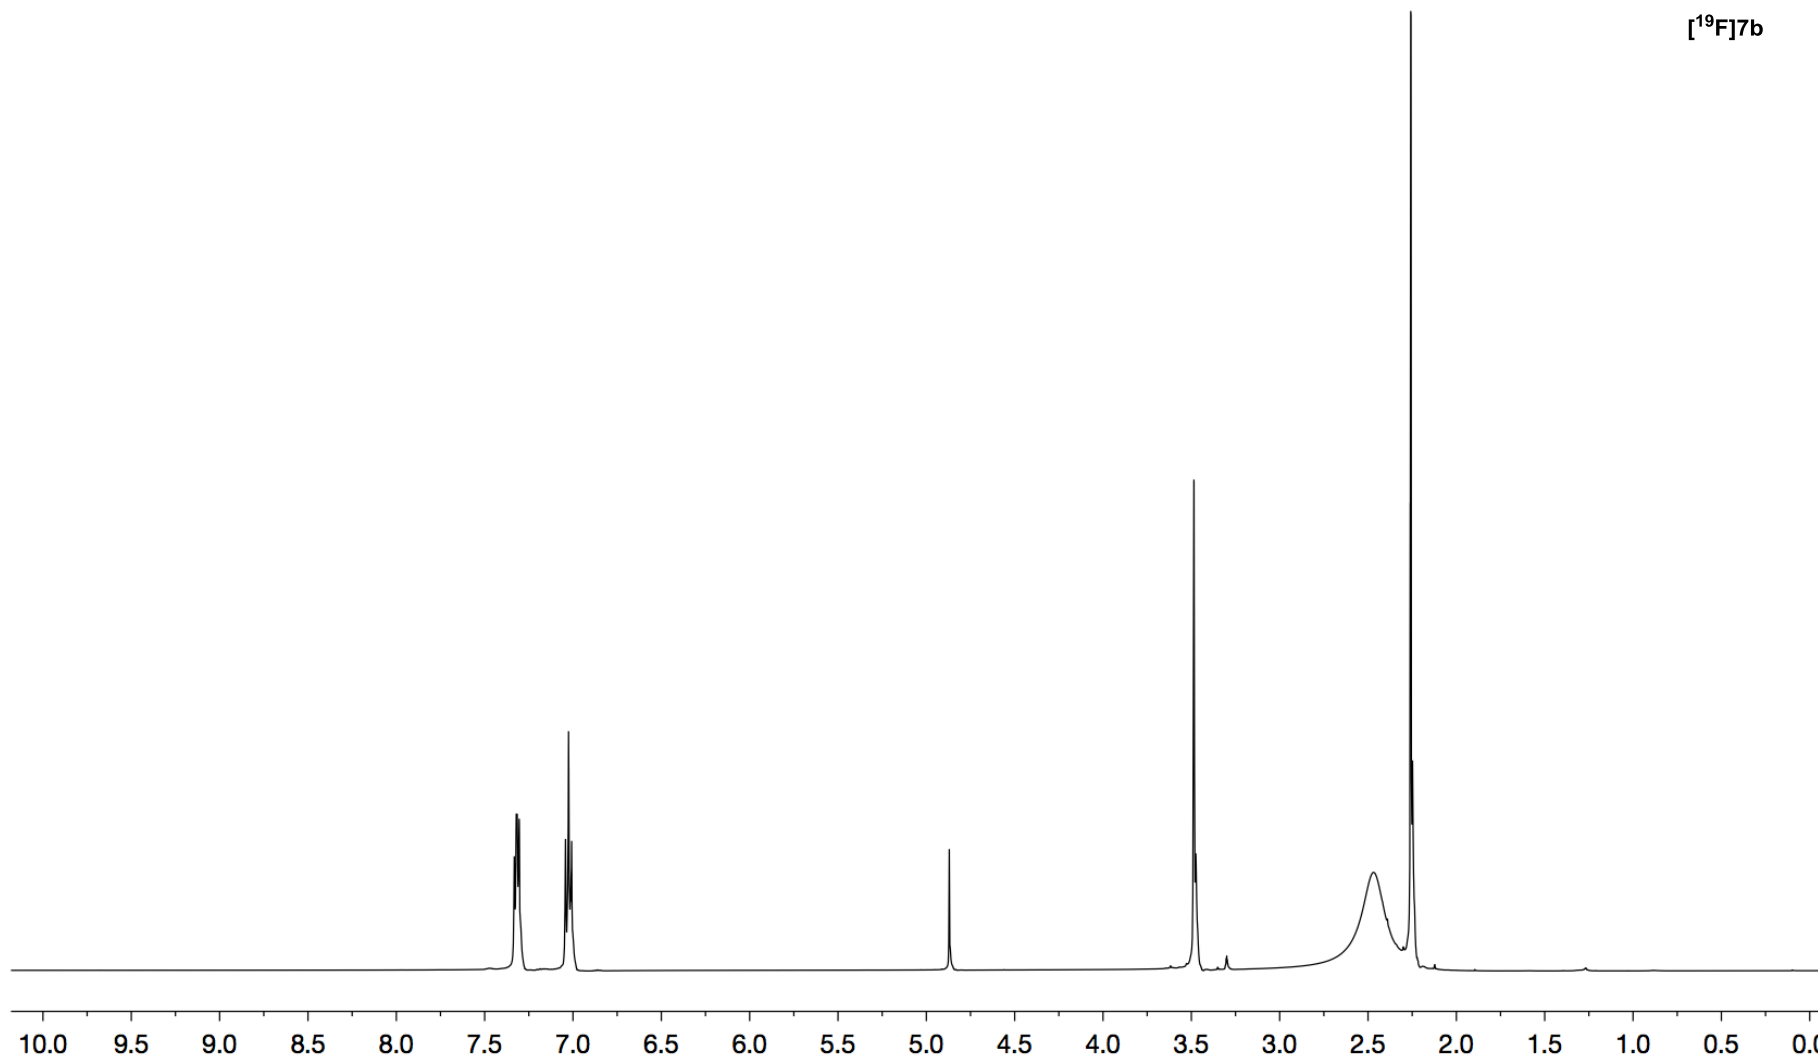

$^{13}\text{C}$  NMR of 1-(4-fluorobenzyl)-4-methylpiperazine ( $[^{19}\text{F}]\mathbf{7b}$ ):

125 MHz,  $\text{CD}_3\text{OD}$ , 23 °C

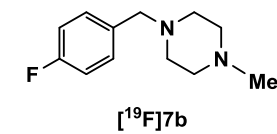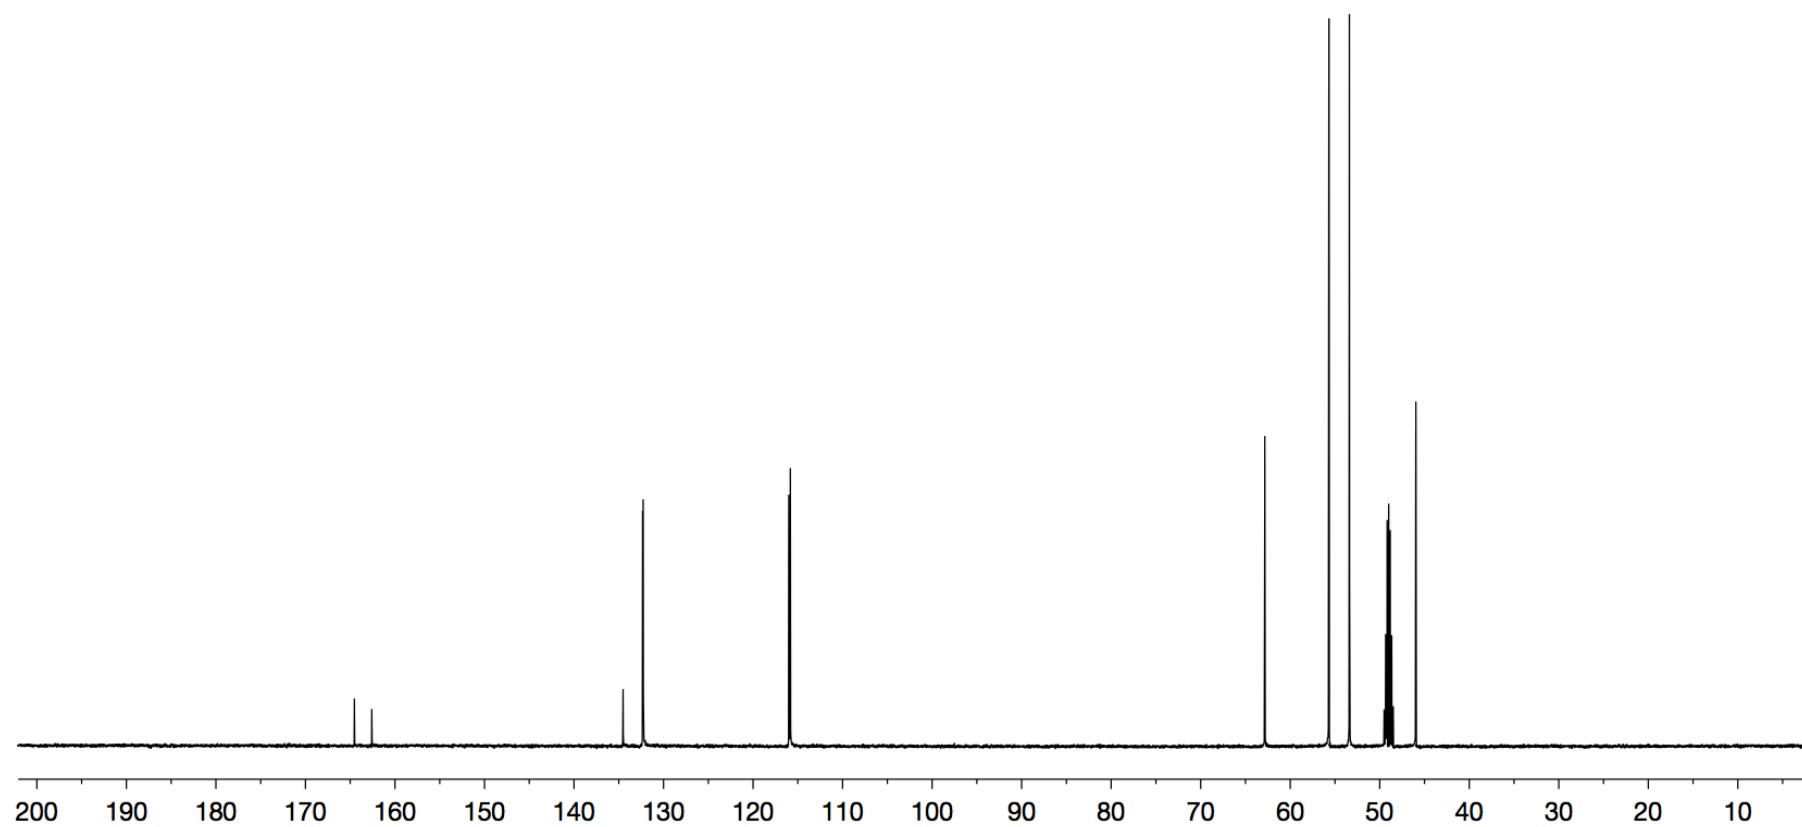

$^{19}\text{F}$  NMR of 1-(4-fluorobenzyl)-4-methylpiperazine ( $[^{19}\text{F}]\mathbf{7b}$ ):

376 MHz,  $\text{CDCl}_3$ , 23  $^\circ\text{C}$

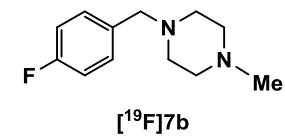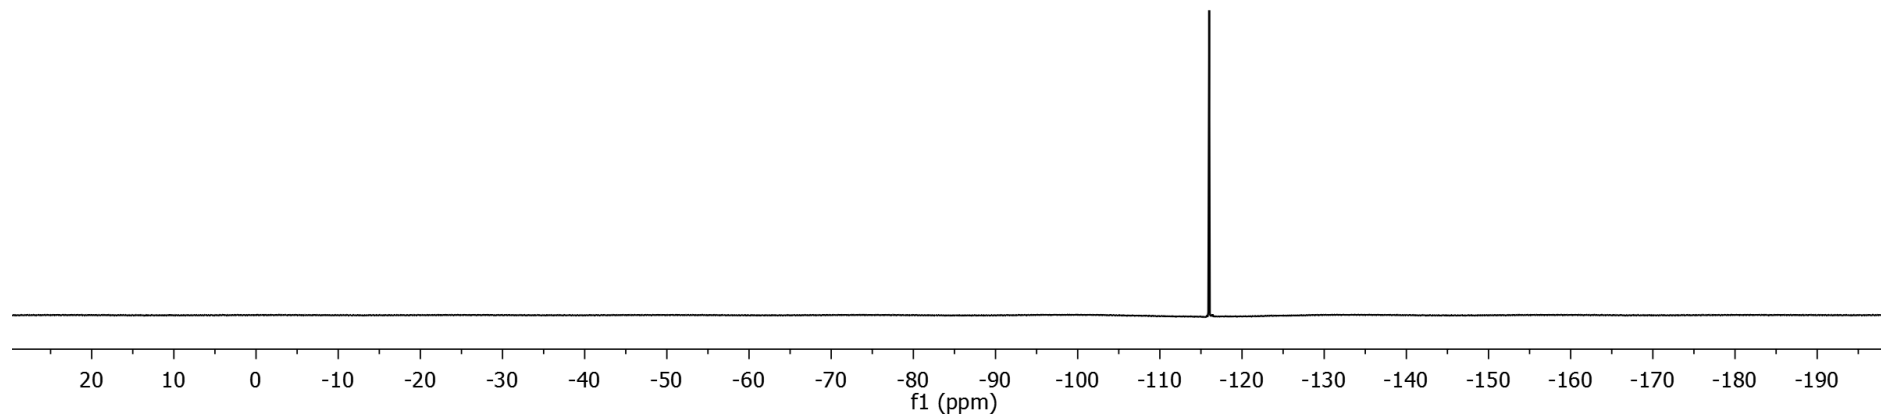

$^1\text{H}$  NMR of ethyl 3-fluoro-9*H*-carbazole-9-carboxylate ( $[\text{}^{19}\text{F}]\mathbf{7f}$ ):

600 MHz,  $\text{CDCl}_3$ , 23  $^\circ\text{C}$

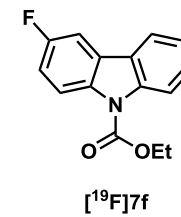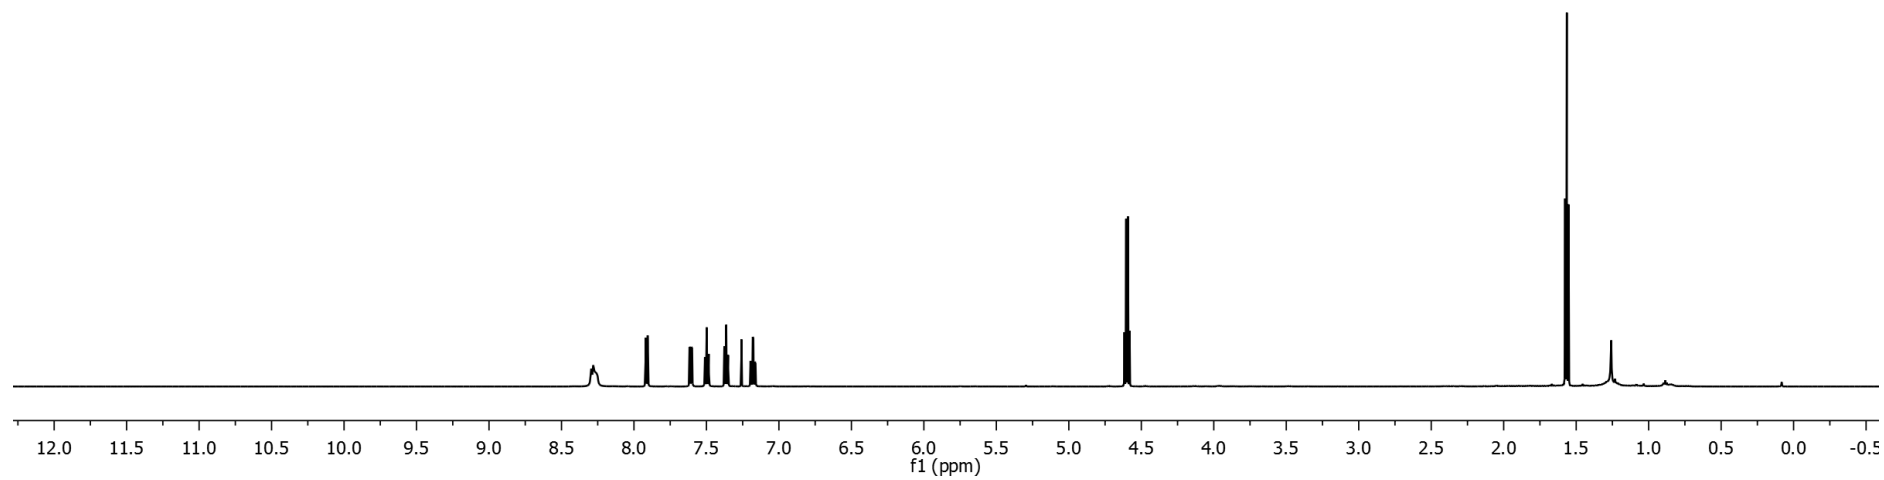

$^{13}\text{C}$  NMR of ethyl 3-fluoro-9*H*-carbazole-9-carboxylate ( $[^{19}\text{F}]\mathbf{7f}$ ):

126 MHz,  $\text{CDCl}_3$ , 23 °C

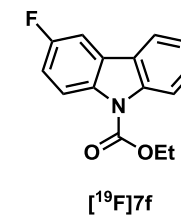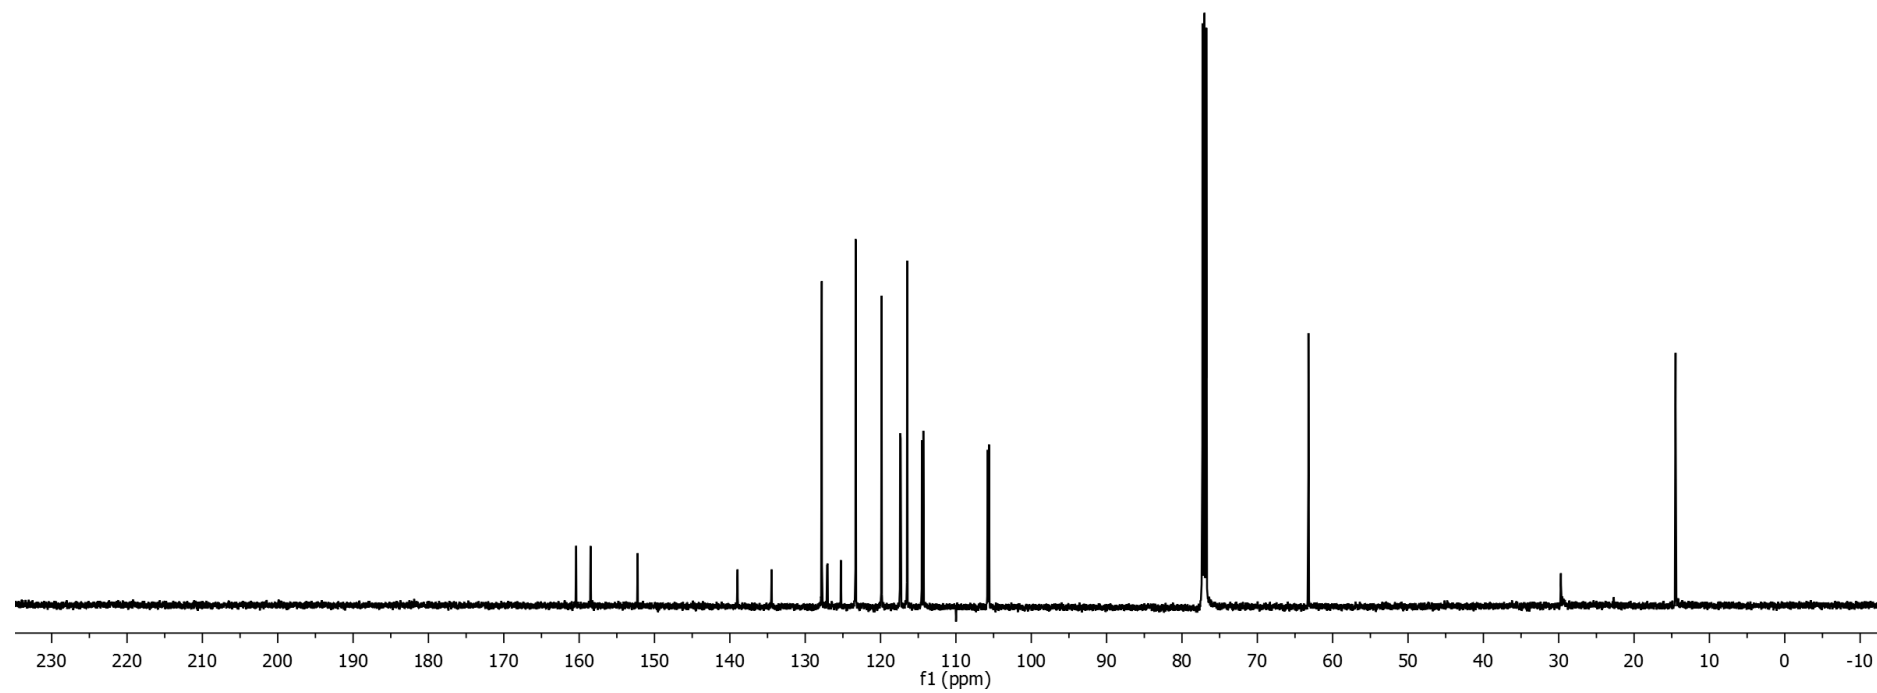

$^{19}\text{F}$  NMR of ethyl 3-fluoro-9*H*-carbazole-9-carboxylate ( $[^{19}\text{F}]\mathbf{7f}$ ):

471 MHz,  $\text{CDCl}_3$ , 23 °C

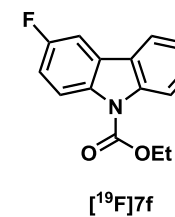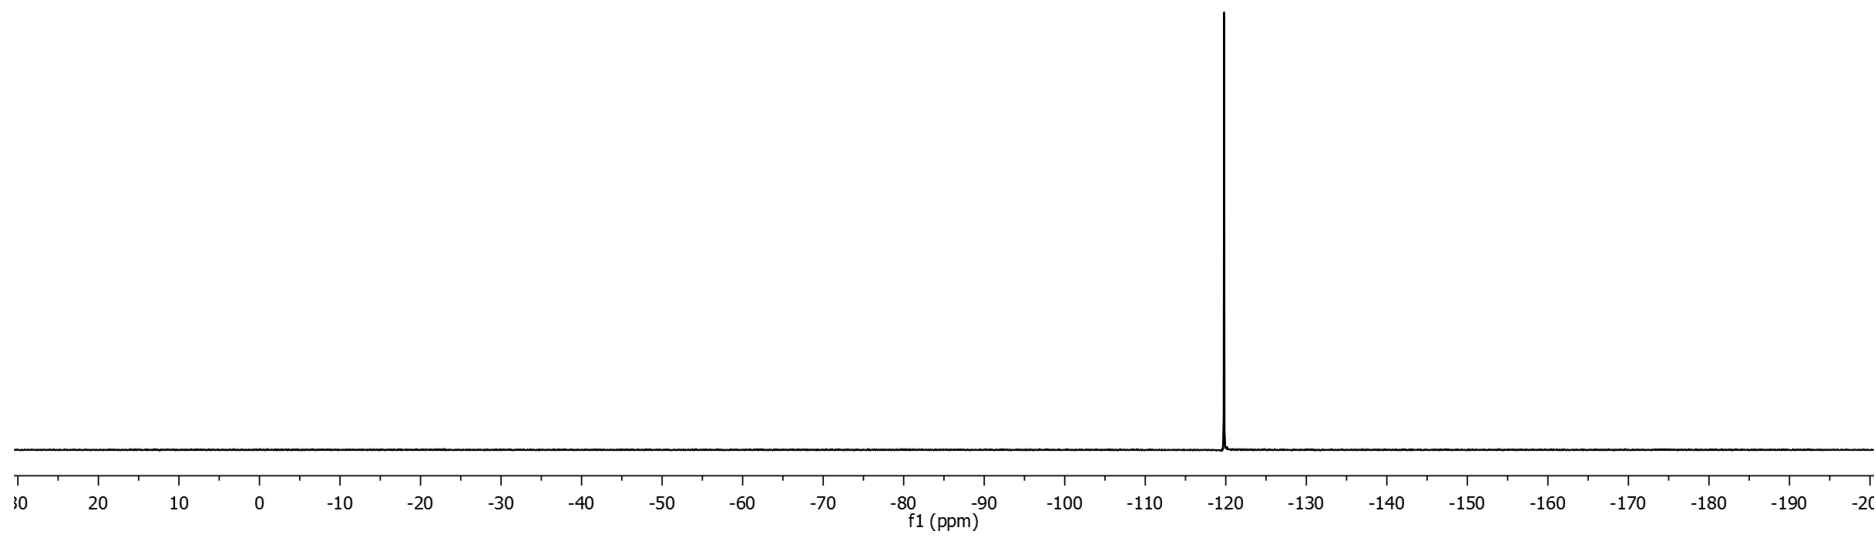

$^1\text{H}$  NMR of *N*-(2-((2,4-dinitrophenyl)thio)-4-fluorophenyl)acetamide (**S17**):

500 MHz,  $\text{CDCl}_3$ , 23  $^\circ\text{C}$

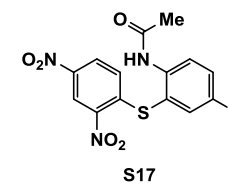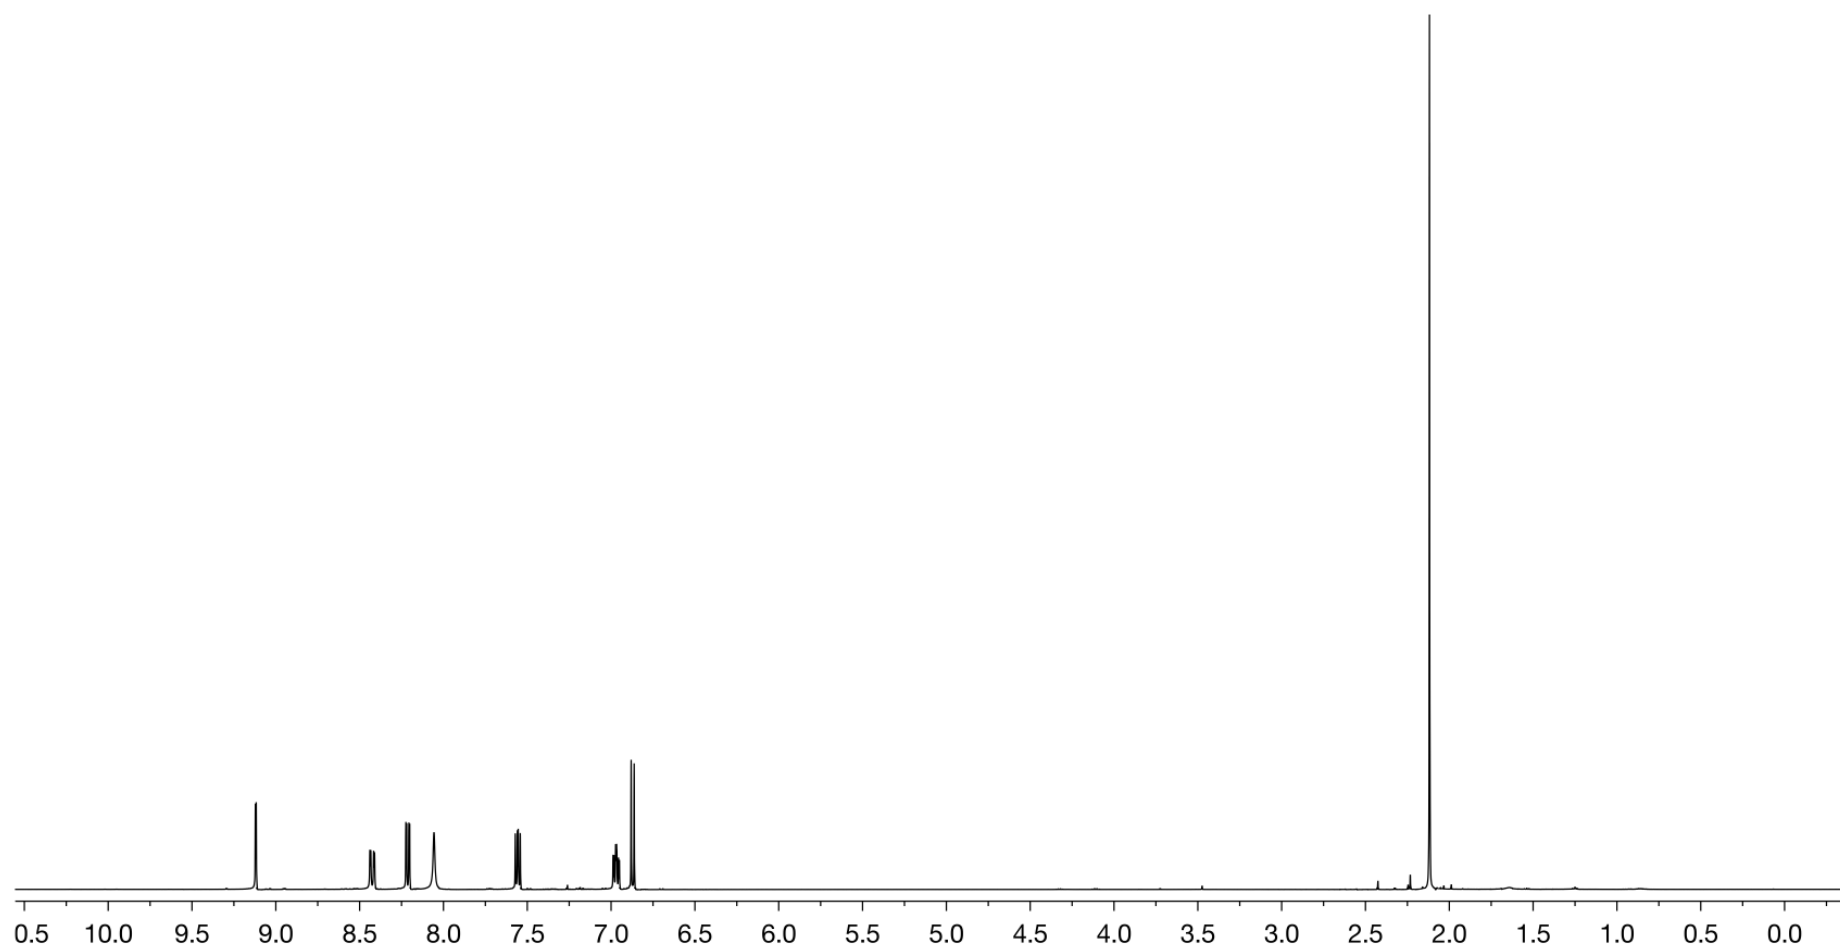



$^{13}\text{C}$  NMR of *N*-(2-((2,4-dinitrophenyl)thio)-4-fluorophenyl)acetamide (**S17**):

125 MHz,  $\text{CDCl}_3$ , 23 °C

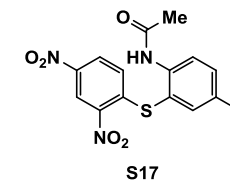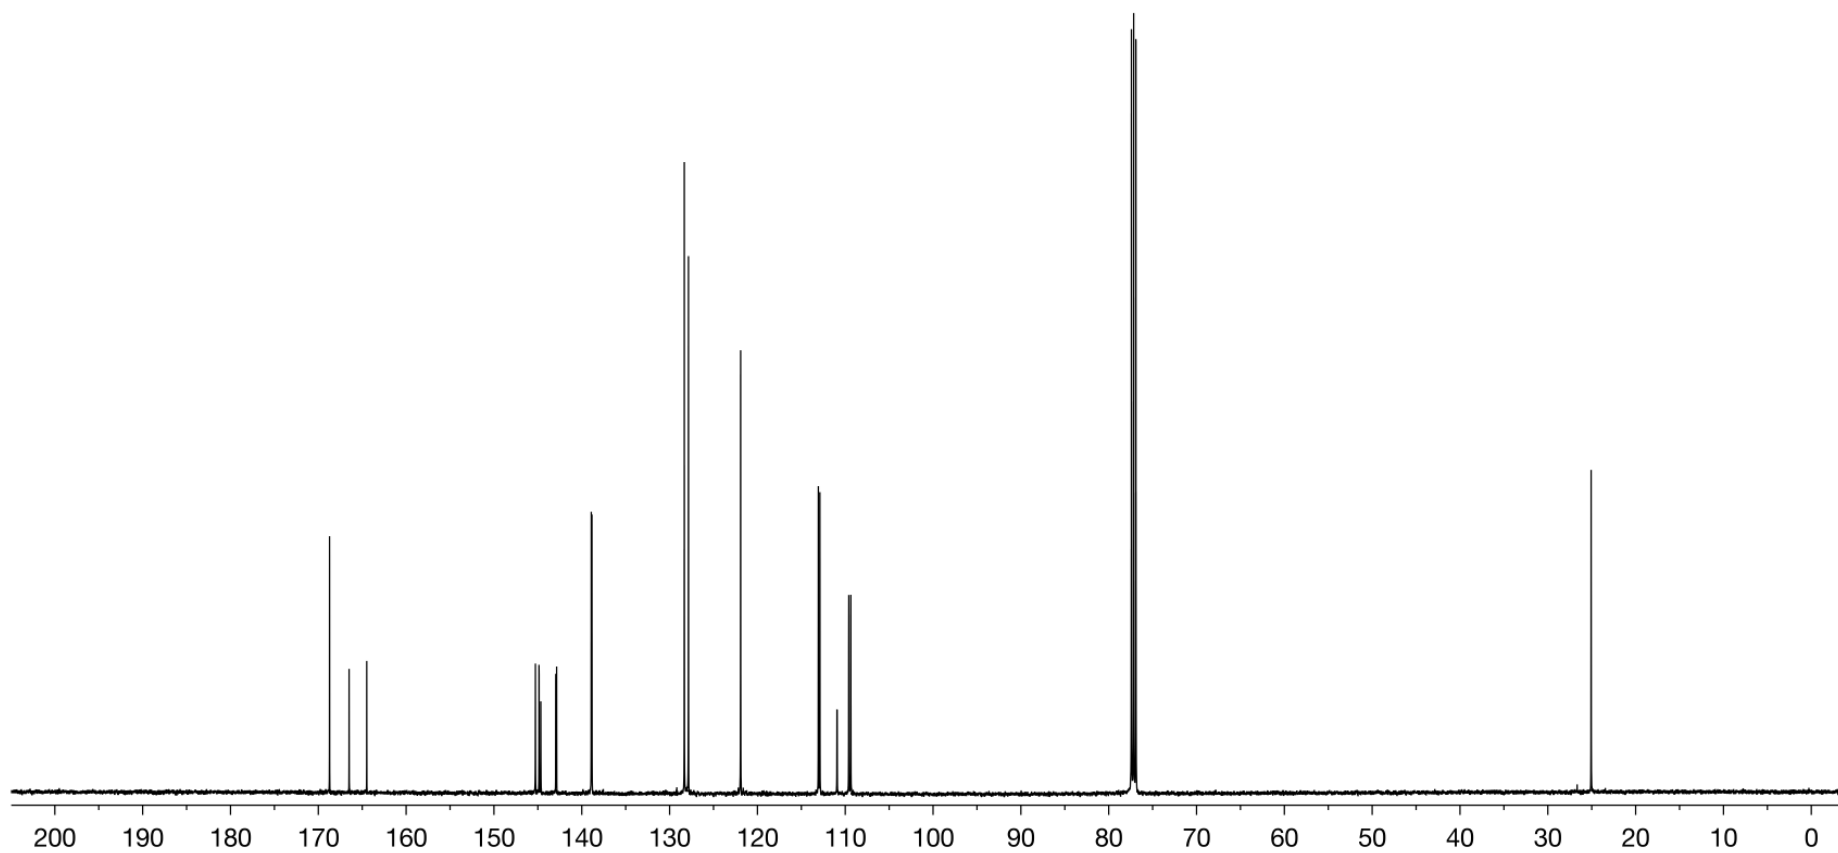

$^{19}\text{F}$  NMR of *N*-(2-((2,4-dinitrophenyl)thio)-4-fluorophenyl)acetamide (**S17**):

376 MHz,  $\text{CDCl}_3$ , 23 °C

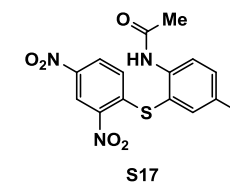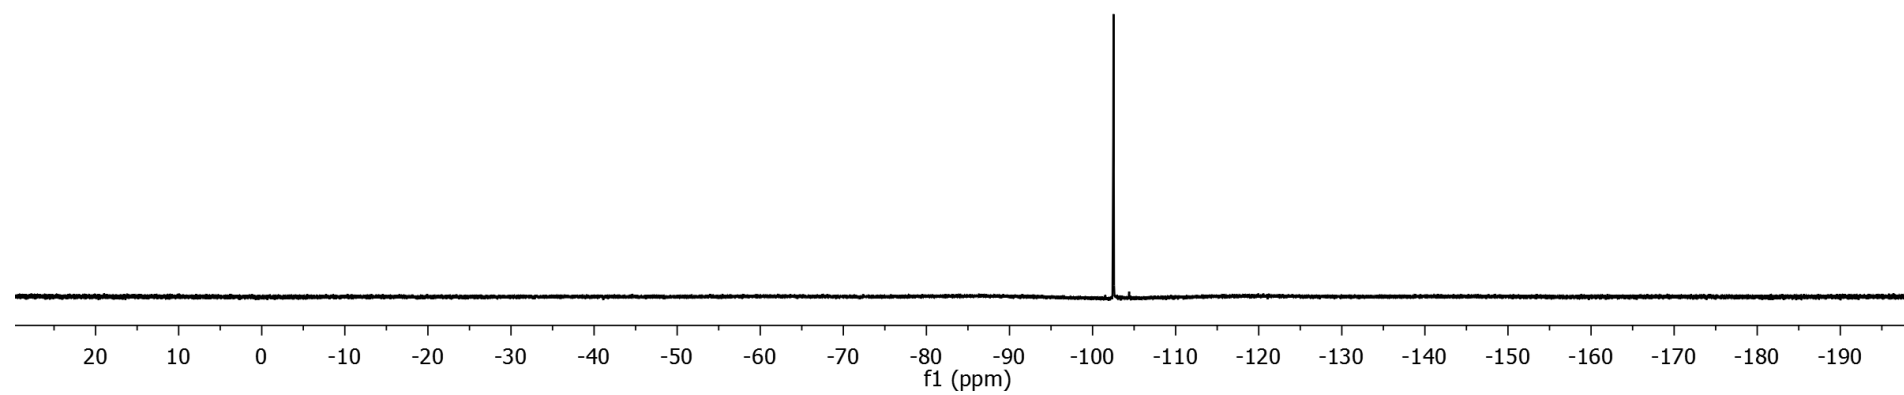

$^1\text{H}$  NMR of 1-(3-fluoro-7-nitro-10*H*-phenothiazin-10-yl)ethan-1-one ( $[\text{}^{19}\text{F}]\mathbf{7g}$ ):

500 MHz,  $\text{CDCl}_3$ , 23  $^\circ\text{C}$

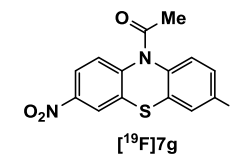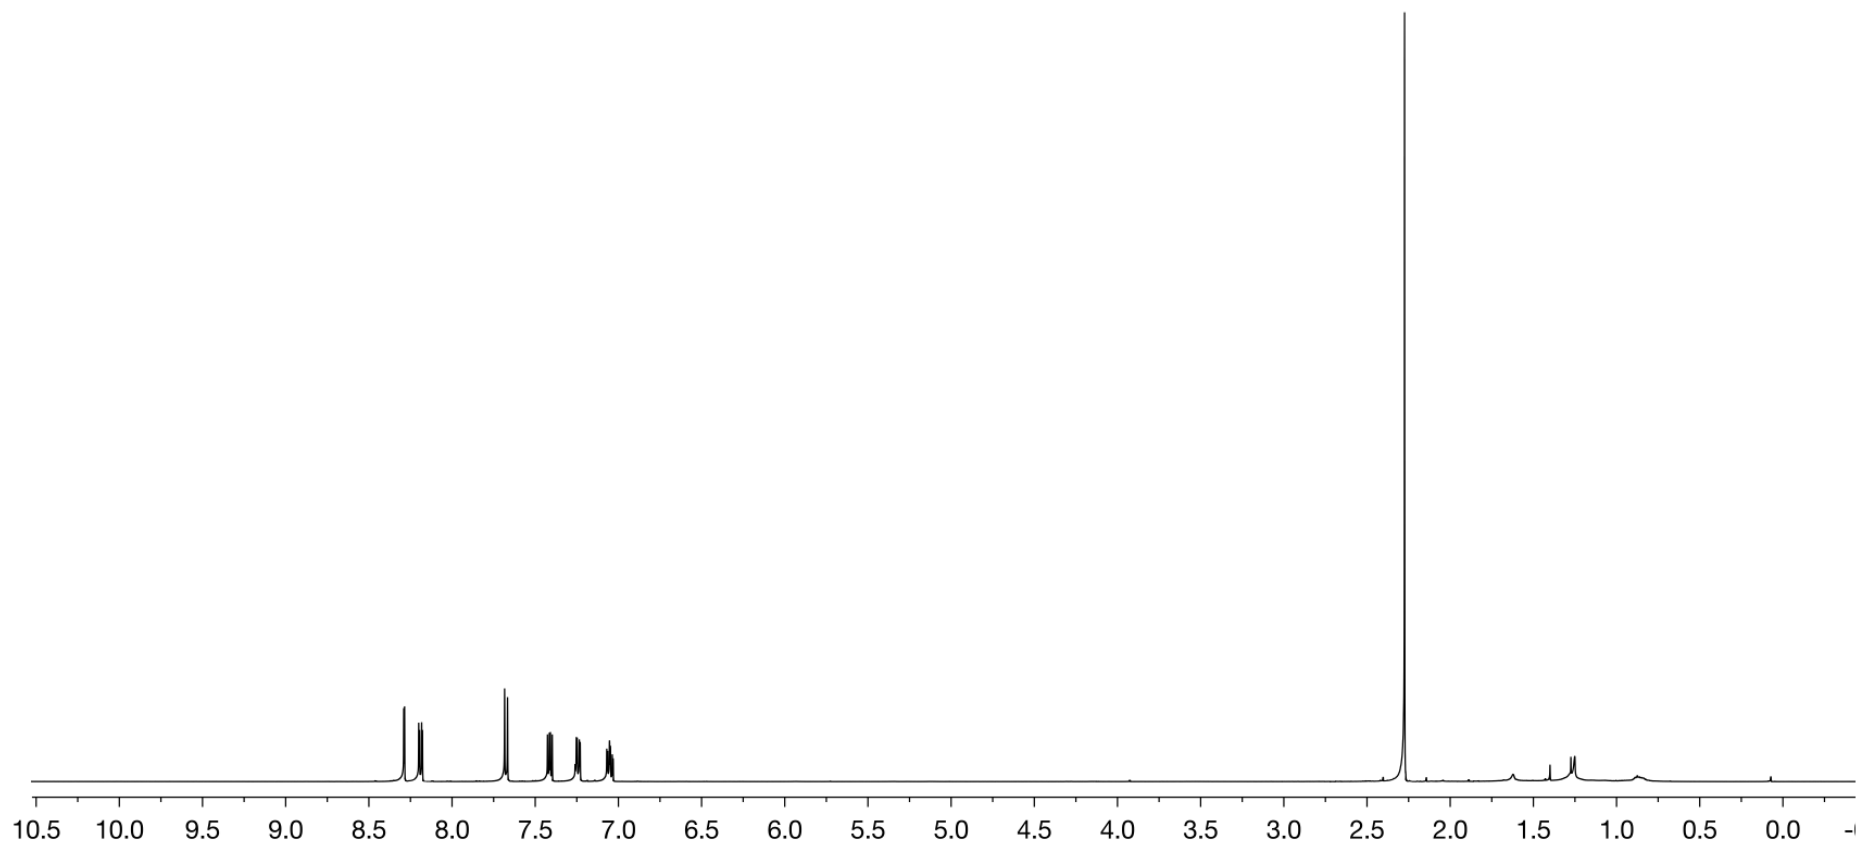

$^{13}\text{C}$  NMR of 1-(3-fluoro-7-nitro-10*H*-phenothiazin-10-yl)ethan-1-one ( $[^{19}\text{F}]\mathbf{7g}$ ):

125 MHz,  $\text{CDCl}_3$ , 23 °C

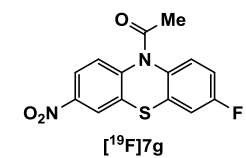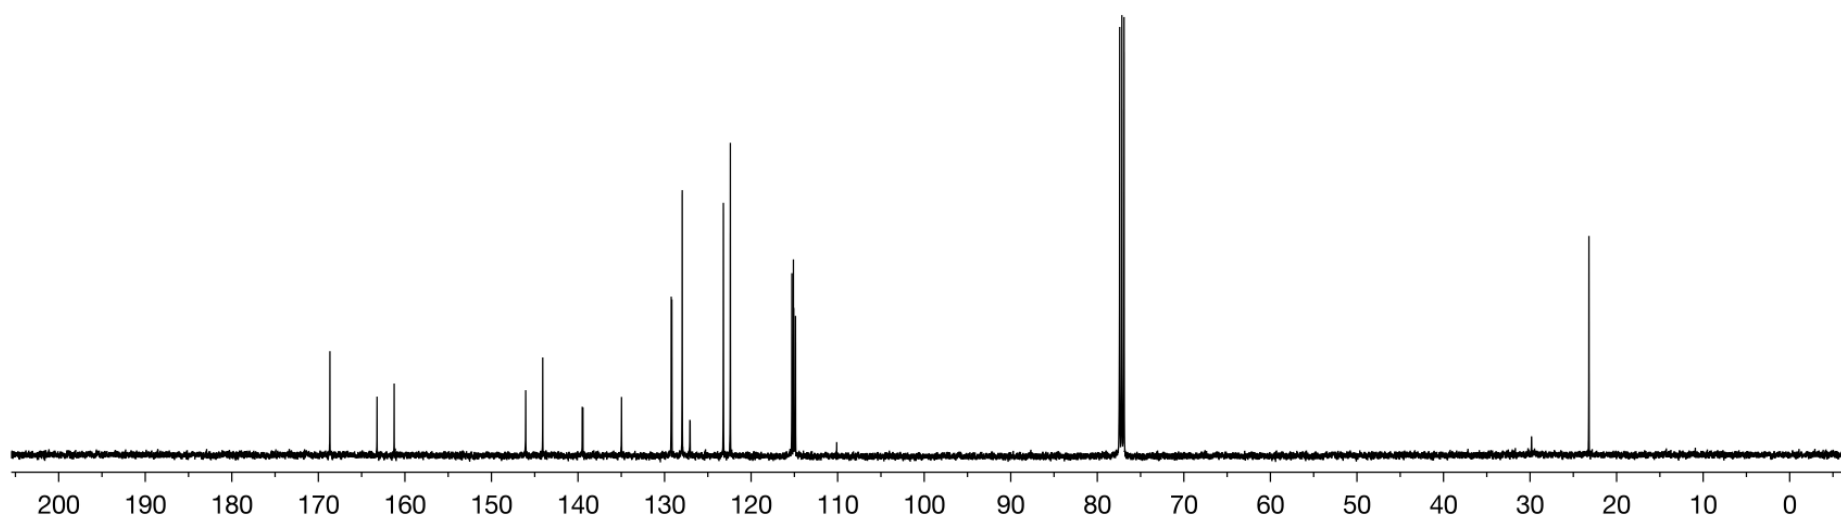

$^{19}\text{F}$  NMR of 1-(3-fluoro-7-nitro-10*H*-phenothiazin-10-yl)ethan-1-one ( $[^{19}\text{F}]\mathbf{7g}$ ):

376 MHz,  $\text{CDCl}_3$ , 23 °C

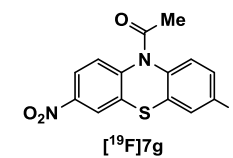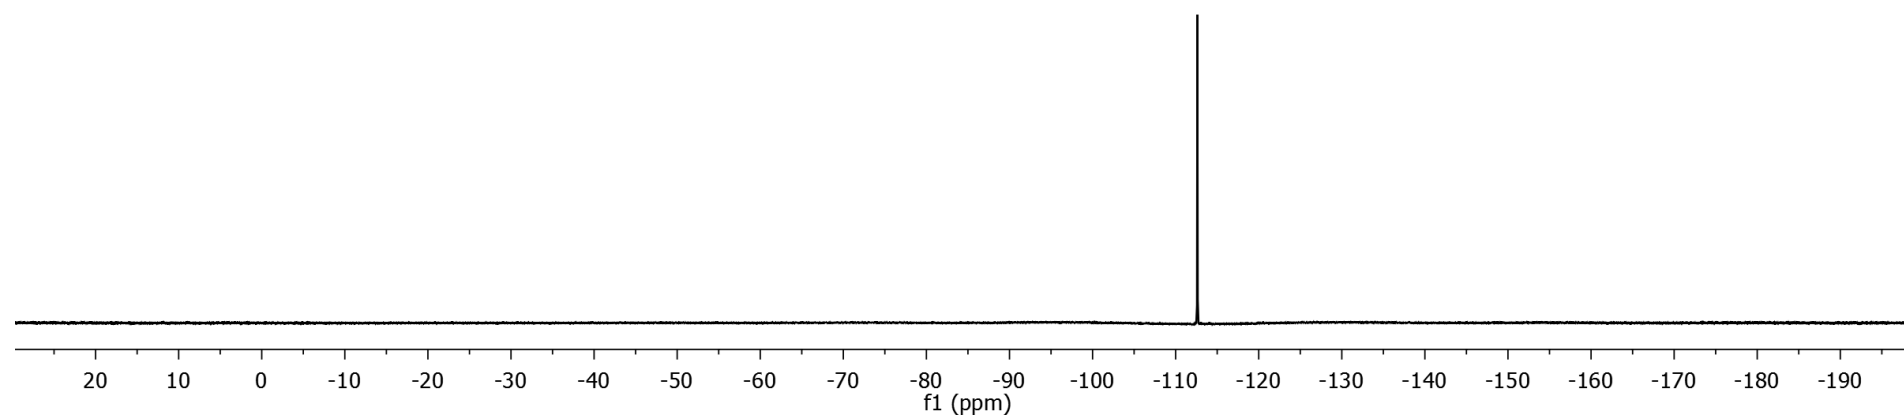

$^1\text{H}$  NMR of (3*S*,4*R*)-4-(4-((tert-butyl-diphenylsilyl)oxy)phenyl)-1-(4-fluorophenyl)-3-((*R*)-3-(4-fluorophenyl)-3-hydroxypropyl)-azetidin-2-one (**S20**):

600 MHz,  $\text{CDCl}_3$ , 23 °C

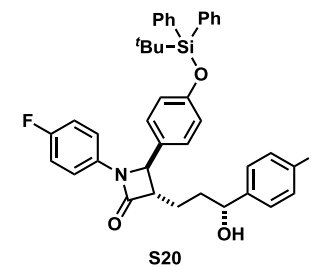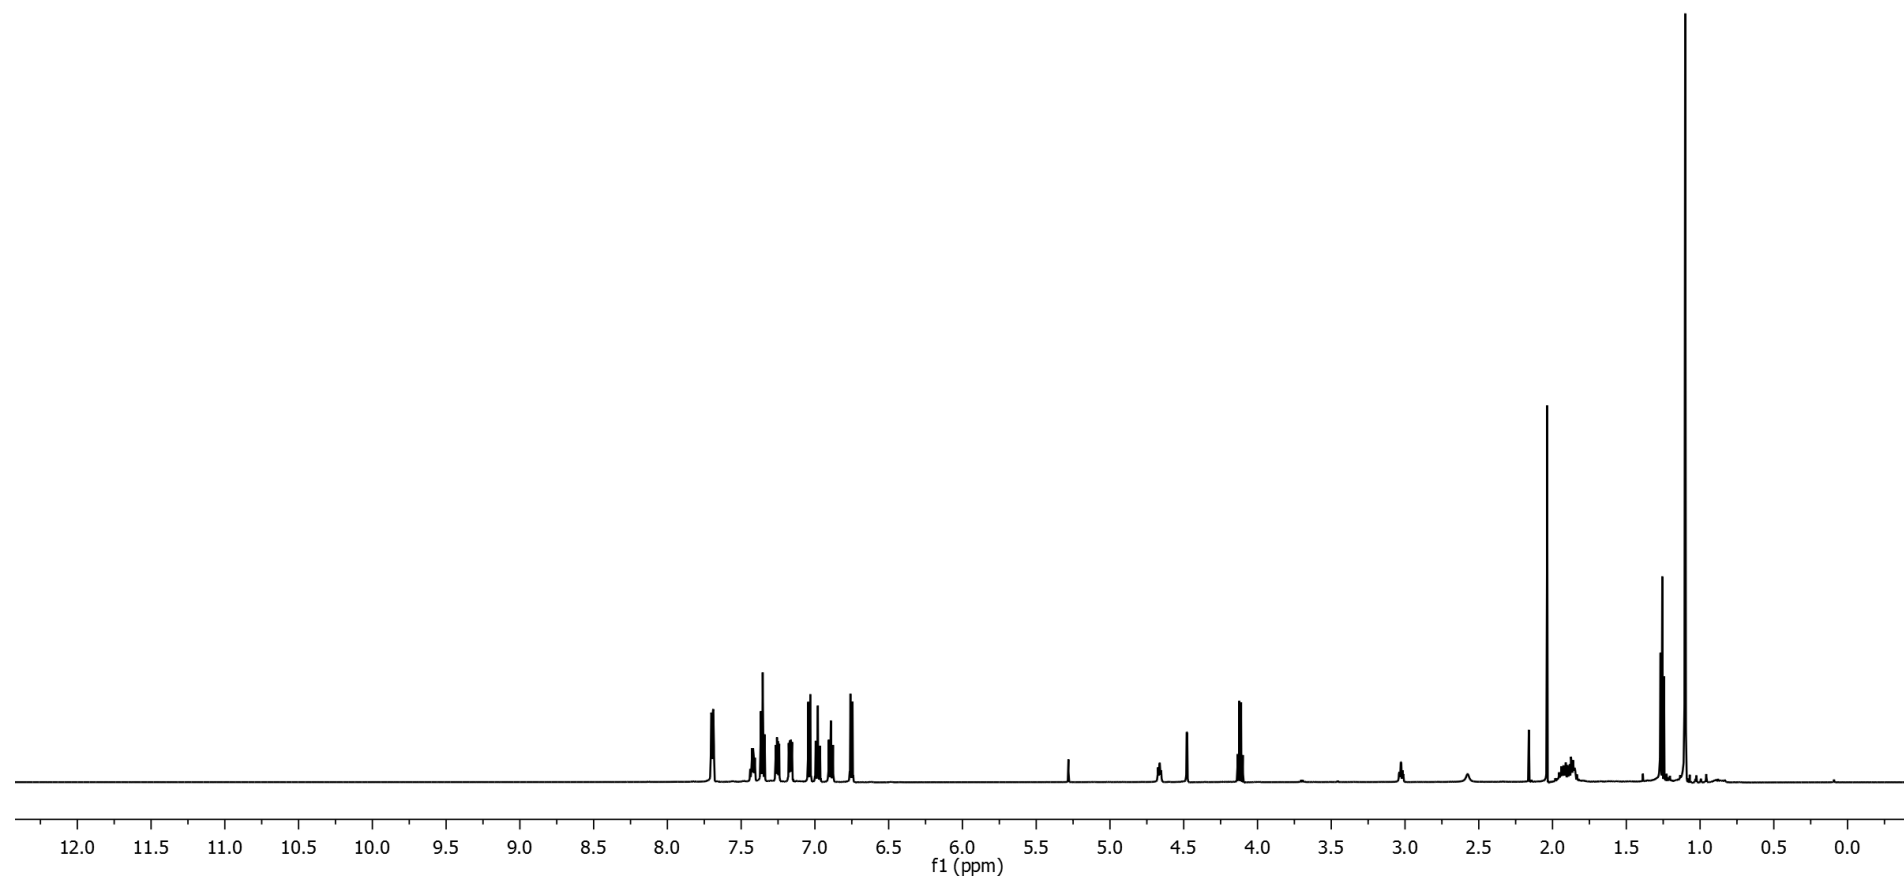

$^{13}\text{C}$  NMR of (3*S*,4*R*)-4-(4-((*tert*-butyldiphenylsilyl)oxy)phenyl)-1-(4-fluorophenyl)-3-((*R*)-3-(4-fluorophenyl)-3-hydroxypropyl)-azetidin-2-one (**S20**):

126 MHz,  $\text{CDCl}_3$ , 23 °C

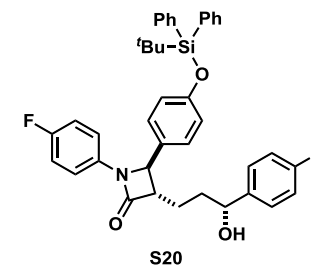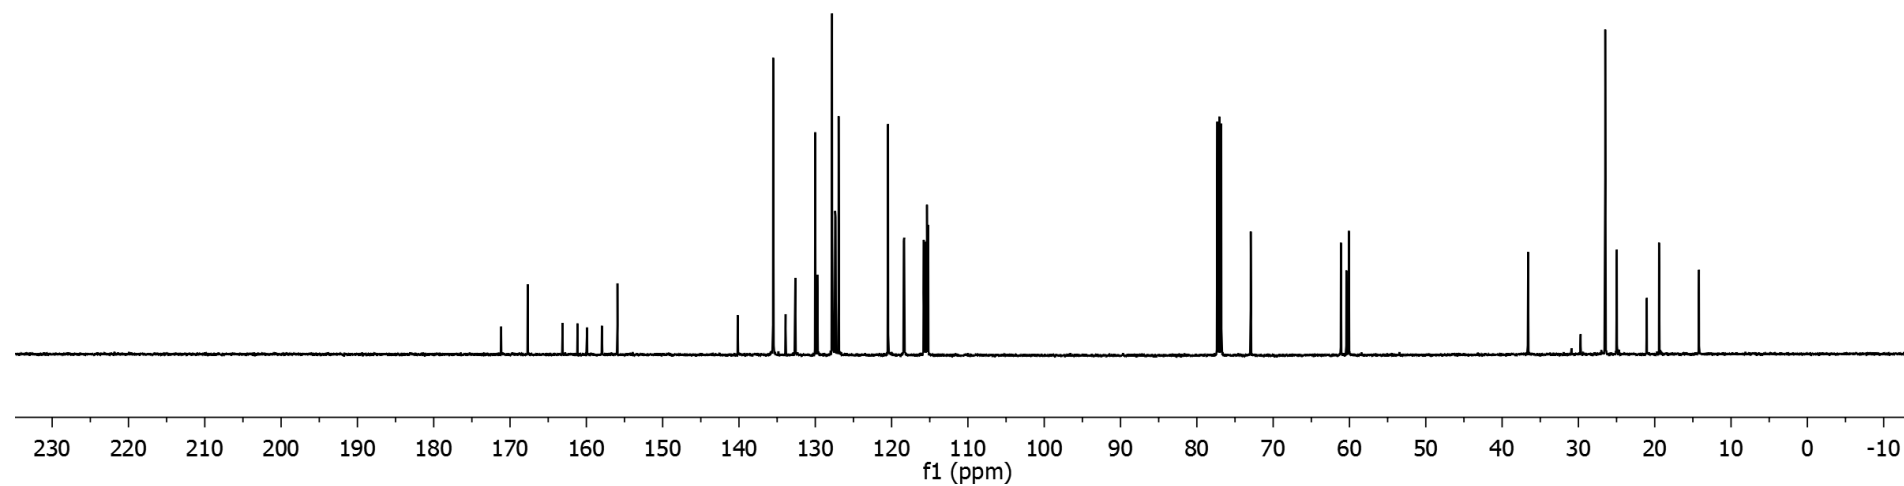

$^{19}\text{F}$  NMR of (3*S*,4*R*)-4-(4-((*tert*-butyldiphenylsilyl)oxy)phenyl)-1-(4-fluorophenyl)-3-((*R*)-3-(4-fluorophenyl)-3-hydroxypropyl)-azetidin-2-one (**S20**):

471 MHz,  $\text{CDCl}_3$ , 23 °C

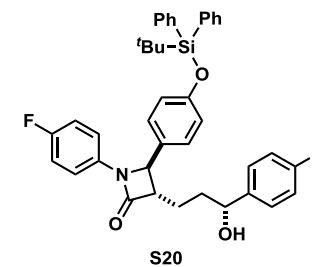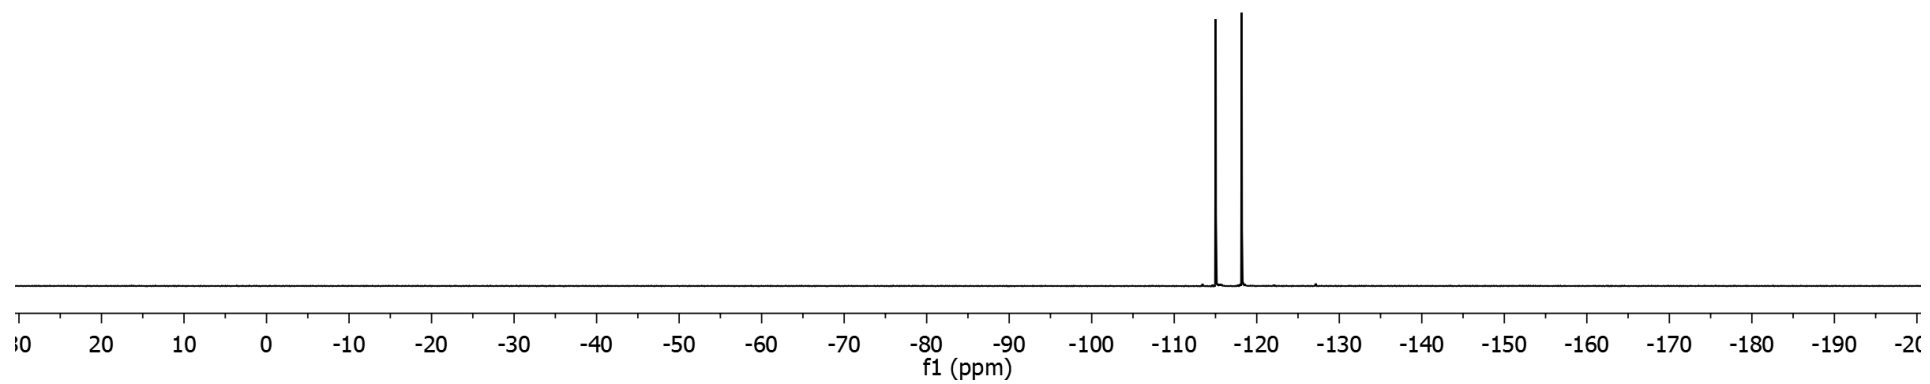



$^1\text{H}$  NMR of (3*S*,4*R*)-4-(4-((tert-butylidiphenylsilyl)oxy)phenyl)-1-(4-fluorophenyl)-3-((*R*)-3-(4-fluorophenyl)-3-((4-methoxybenzyl)oxy)propyl)azetidin-2-one (**S21**):

600 MHz,  $\text{CDCl}_3$ , 23 °C

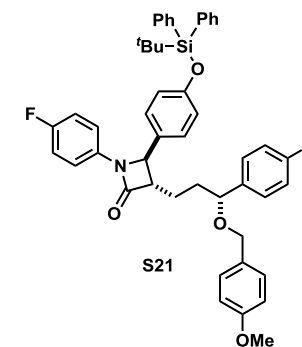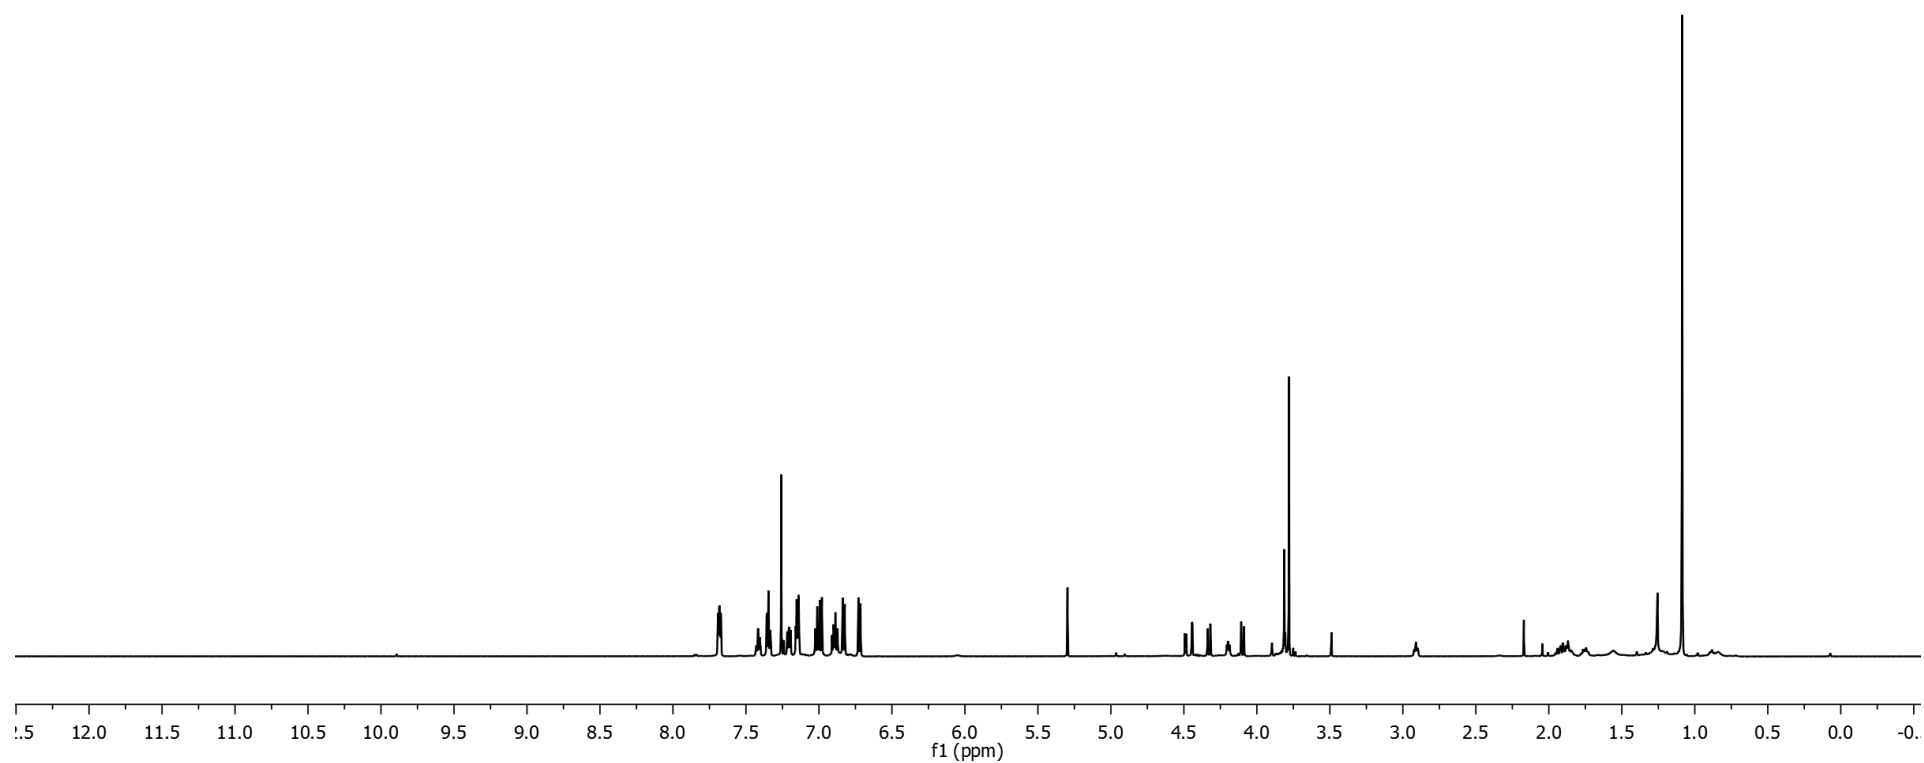

$^{13}\text{C}$  NMR of (3*S*,4*R*)-4-(4-((*tert*-butyldiphenylsilyl)oxy)phenyl)-1-(4-fluorophenyl)-3-((*R*)-3-(4-fluorophenyl)-3-((4-methoxybenzyl)oxy)propyl)azetidin-2-one (**S21**):

126 MHz,  $\text{CDCl}_3$ , 23 °C

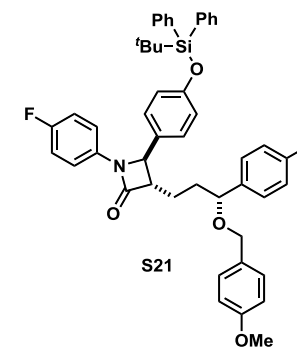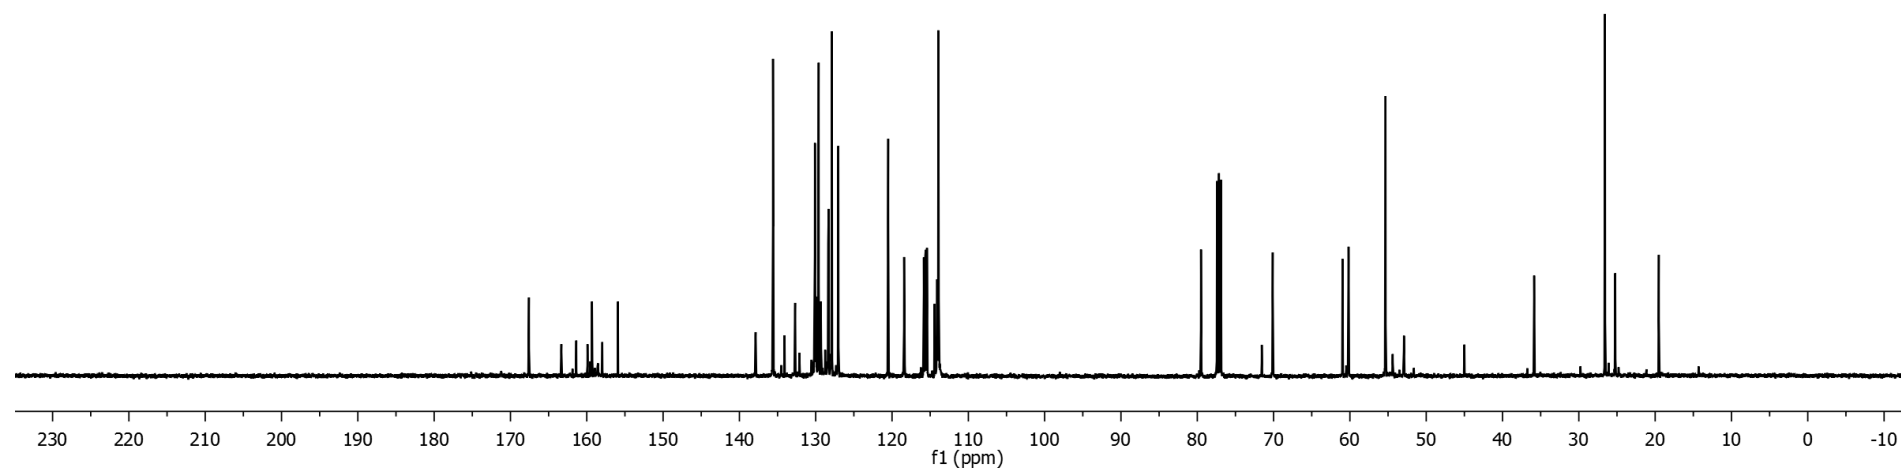

$^{19}\text{F}$  NMR of (3S,4R)-4-(4-((tert-butyldiphenylsilyl)oxy)phenyl)-1-(4-fluorophenyl)-3-((R)-3-(4-fluorophenyl)-3-((4-methoxybenzyl)oxy)propyl)azetidin-2-one (**S21**):

471 MHz,  $\text{CDCl}_3$ , 23 °C

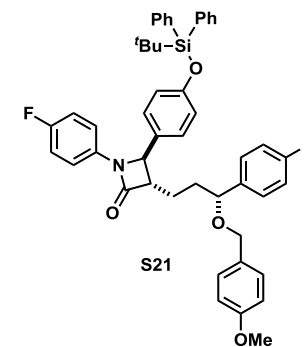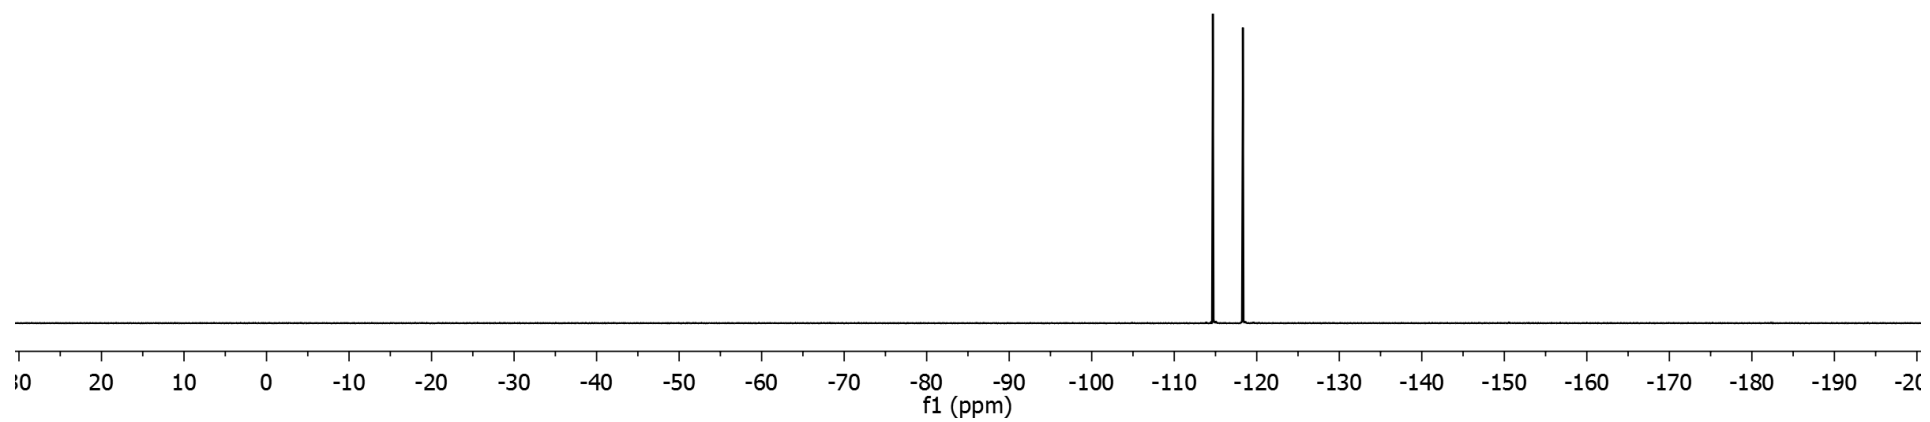

$^1\text{H}$  NMR of (3*S*,4*R*)-1-(4-fluorophenyl)-3-((*R*)-3-(4-fluorophenyl)-3-((4-methoxybenzyl)oxy)propyl)-4-(4-hydroxyphenyl)azetidin-2-one (**S22**):

600 MHz,  $\text{CDCl}_3$ , 23 °C

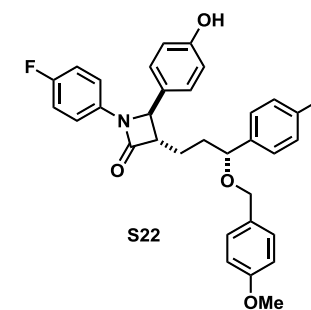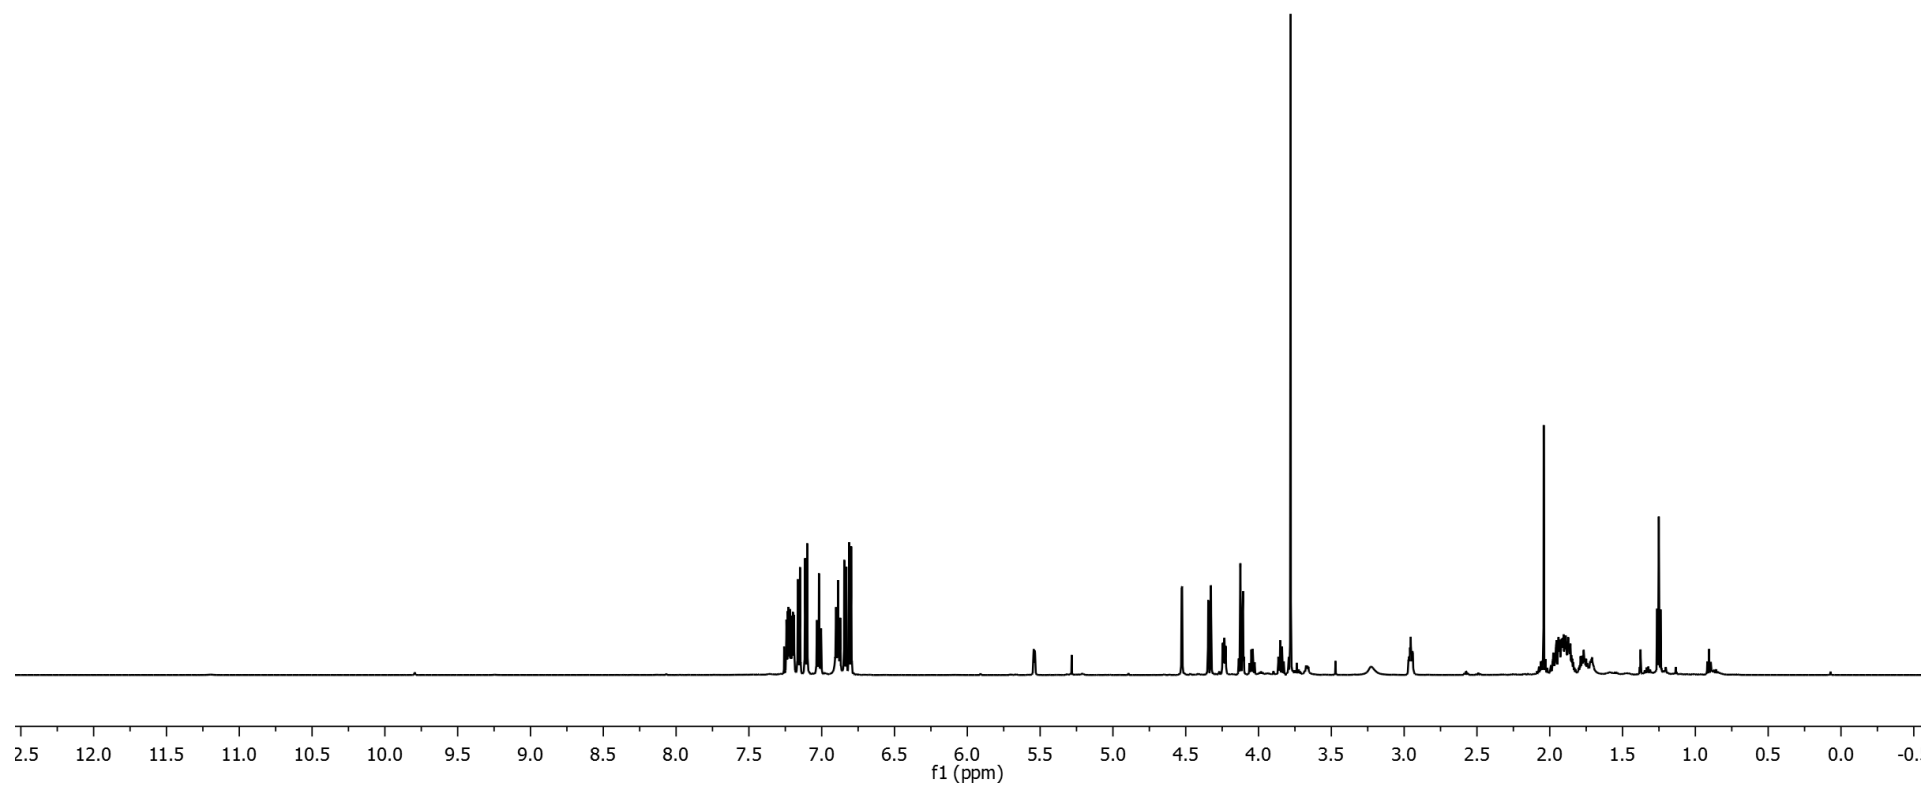

$^{13}\text{C}$  NMR of (3*S*,4*R*)-1-(4-fluorophenyl)-3-((*R*)-3-(4-fluorophenyl)-3-((4-methoxybenzyl)oxy)propyl)-4-(4-hydroxyphenyl)azetidin-2-one (**S22**):

126 MHz,  $\text{CDCl}_3$ , 23 °C

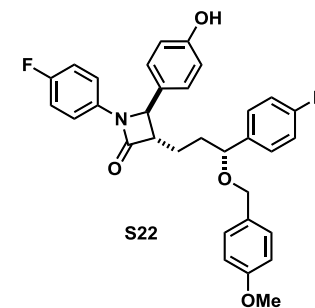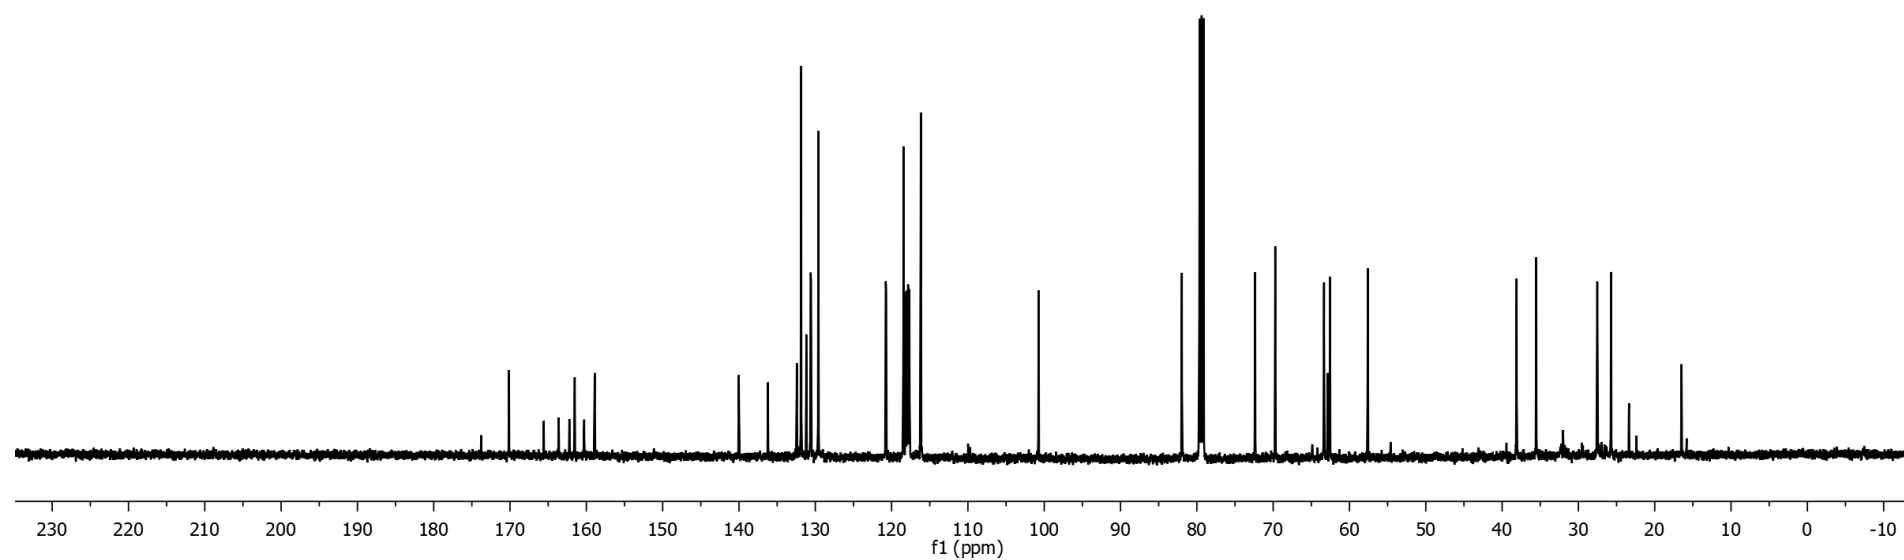

$^{19}\text{F}$  NMR of (3*S*,4*R*)-1-(4-fluorophenyl)-3-((*R*)-3-(4-fluorophenyl)-3-((4-methoxybenzyl)oxy)propyl)-4-(4-hydroxyphenyl)azetidin-2-one (**S22**):

471 MHz,  $\text{CDCl}_3$ , 23 °C

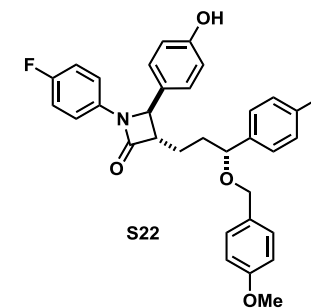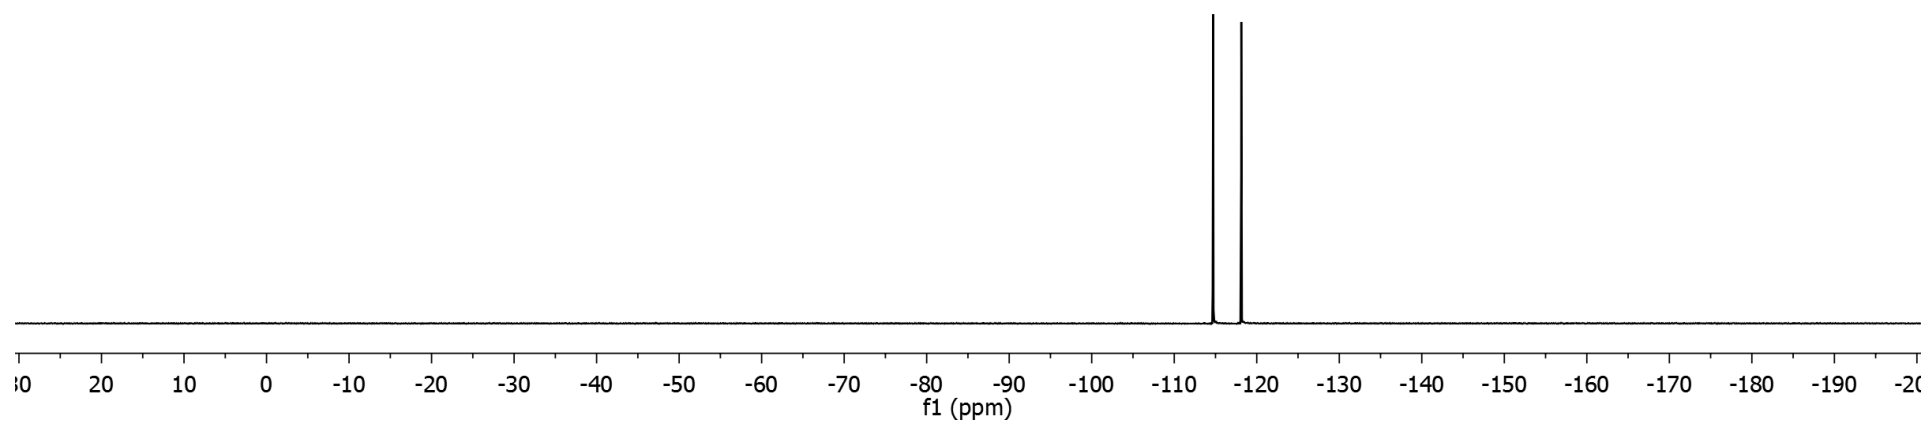

$^1\text{H}$  NMR of (3*S*,4*R*)-1,4-bis(4-fluorophenyl)-3-((*R*)-3-(4-fluorophenyl)-3-((4-methoxybenzyl)oxy)propyl)azetidin-2-one (**S23**):

600 MHz,  $\text{CDCl}_3$ , 23 °C

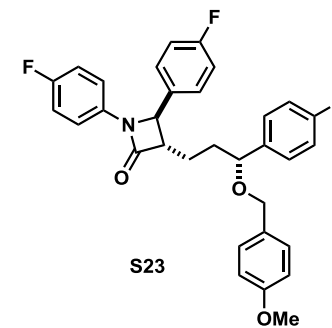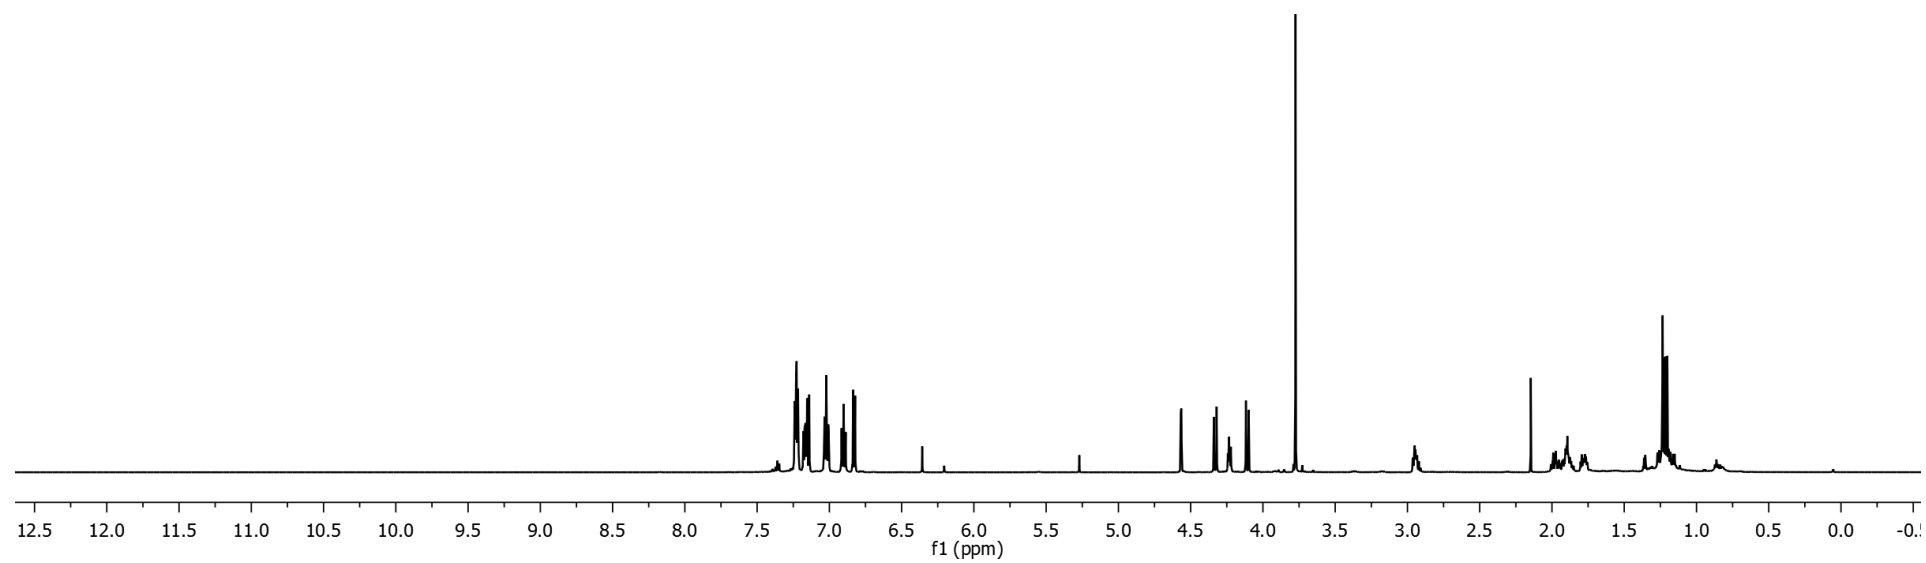

$^{13}\text{C}$  NMR of (3*S*,4*R*)-1,4-bis(4-fluorophenyl)-3-((*R*)-3-(4-fluorophenyl)-3-((4-methoxybenzyl)oxy)propyl)azetidin-2-one (**S23**):

126 MHz,  $\text{CDCl}_3$ , 23 °C

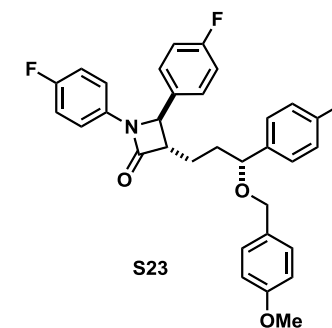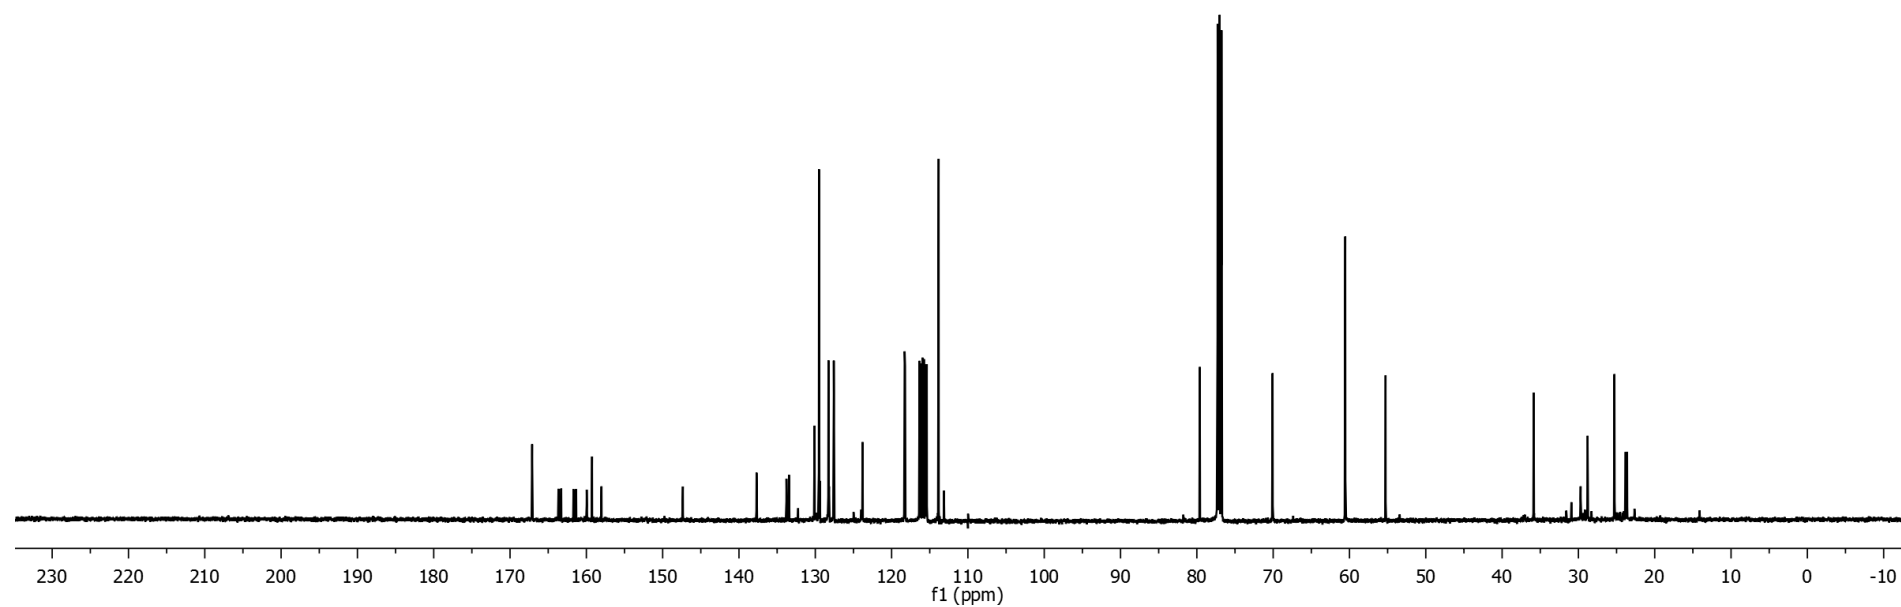



$^{19}\text{F}$  NMR of (3*S*,4*R*)-1,4-bis(4-fluorophenyl)-3-((*R*)-3-(4-fluorophenyl)-3-((4-methoxybenzyl)oxy)propyl)azetidin-2-one (**S23**):

471 MHz,  $\text{CDCl}_3$ , 23 °C

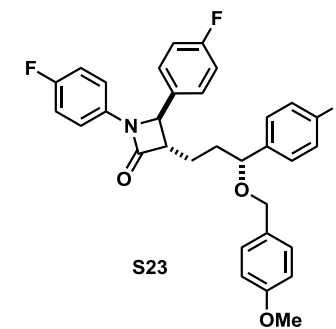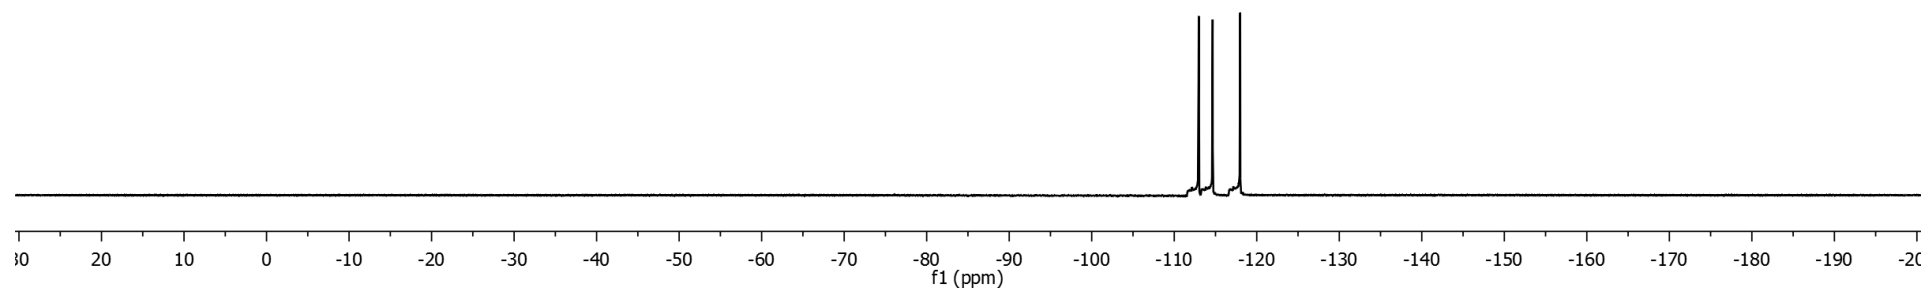

$^1\text{H}$  NMR of (3*S*,4*R*)-1,4-bis(4-fluorophenyl)-3-((*R*)-3-(4-fluorophenyl)-3-hydroxypropyl)azetidin-2-one ( $[^{19}\text{F}]\mathbf{7h}$ ):

600 MHz,  $\text{CDCl}_3$ , 23 °C

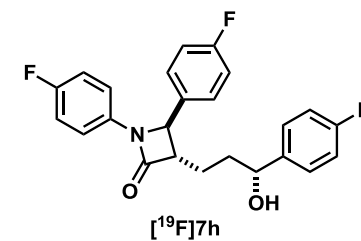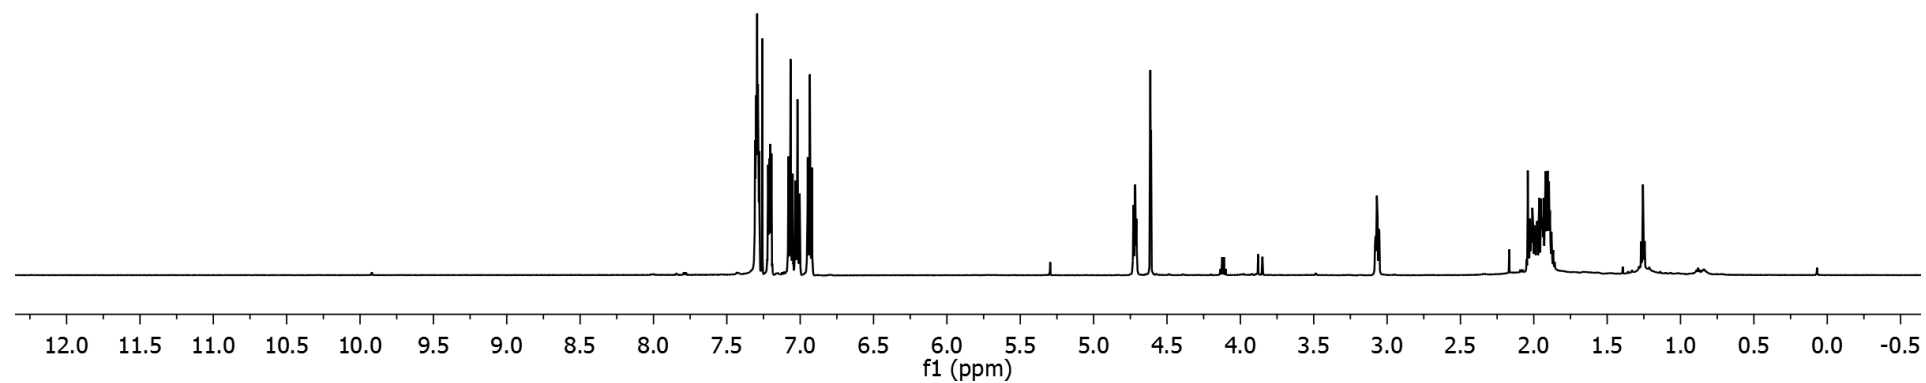

$^{13}\text{C}$  NMR of (3*S*,4*R*)-1,4-bis(4-fluorophenyl)-3-((*R*)-3-(4-fluorophenyl)-3-hydroxypropyl)azetidin-2-one ( $[^{19}\text{F}]\mathbf{7h}$ ):

126 MHz,  $\text{CDCl}_3$ , 23 °C

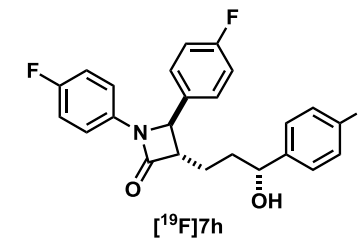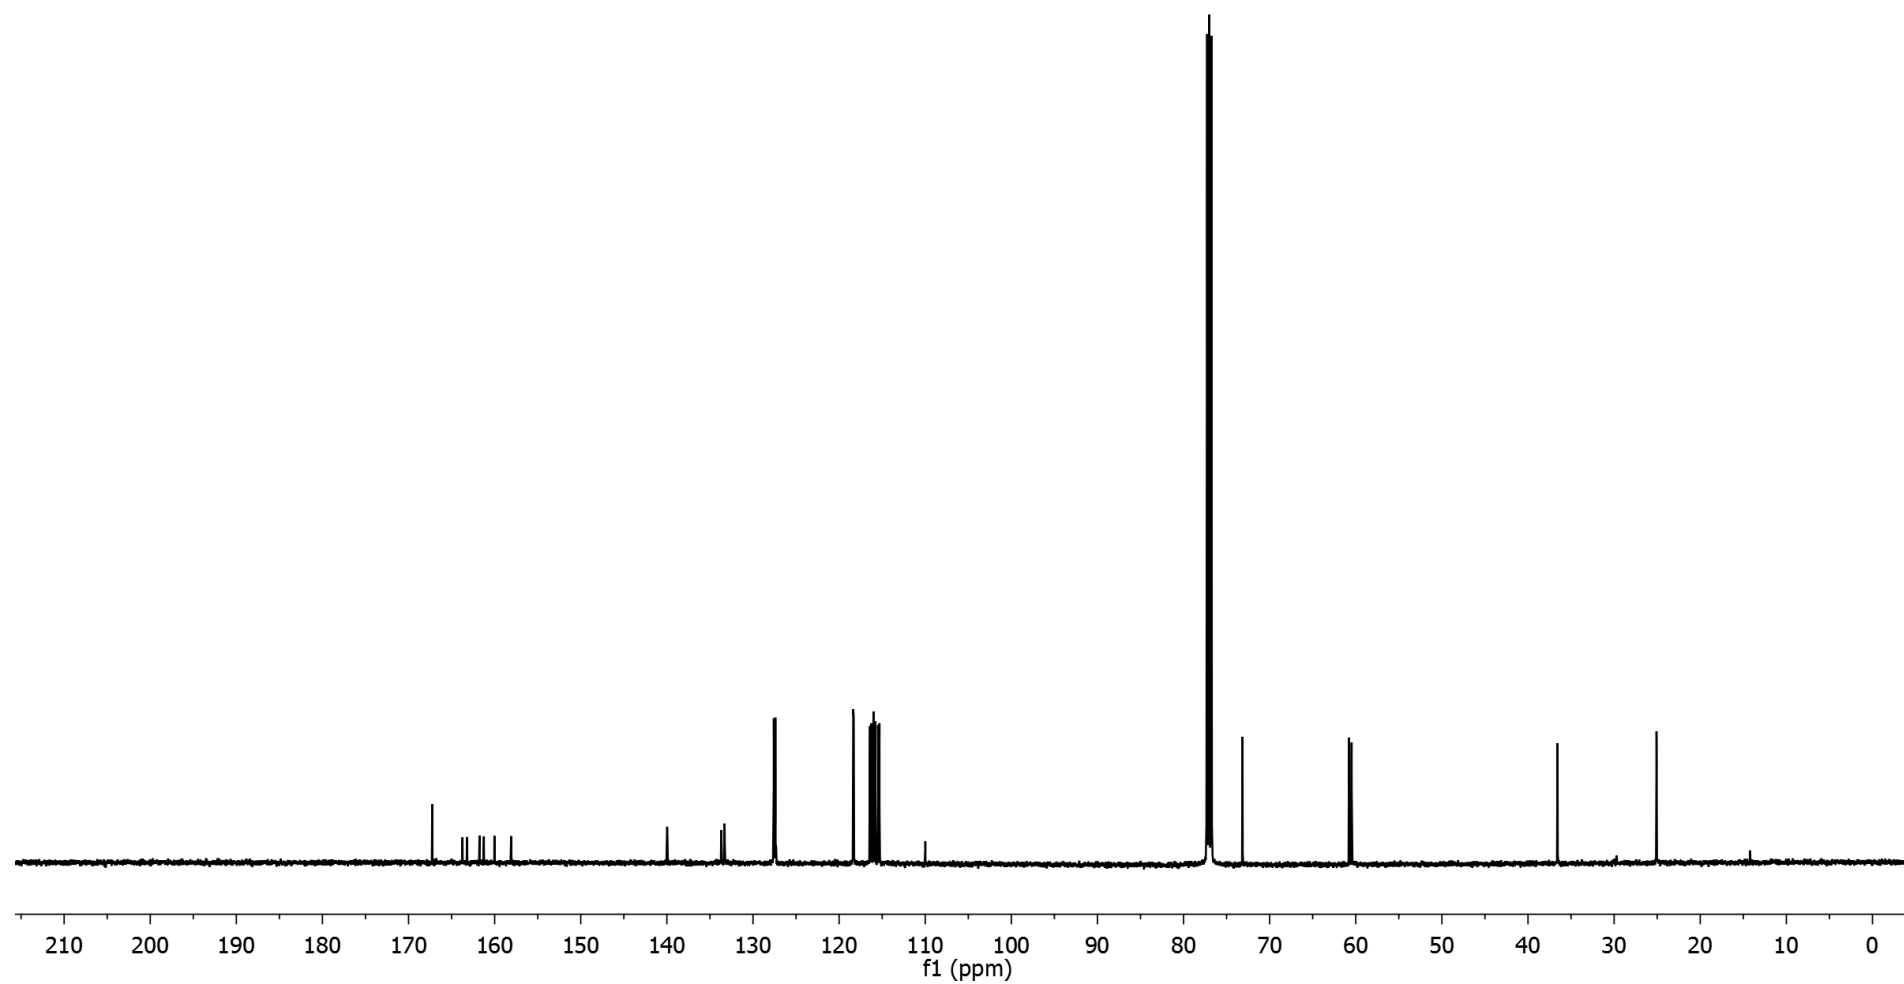

$^{19}\text{F}$  NMR of (3*S*,4*R*)-1,4-bis(4-fluorophenyl)-3-((*R*)-3-(4-fluorophenyl)-3-hydroxypropyl)azetidin-2-one ( $[^{19}\text{F}]\mathbf{7h}$ ):

376 MHz,  $\text{CDCl}_3$ , 23 °C

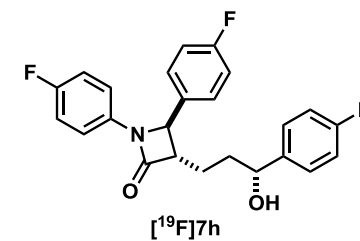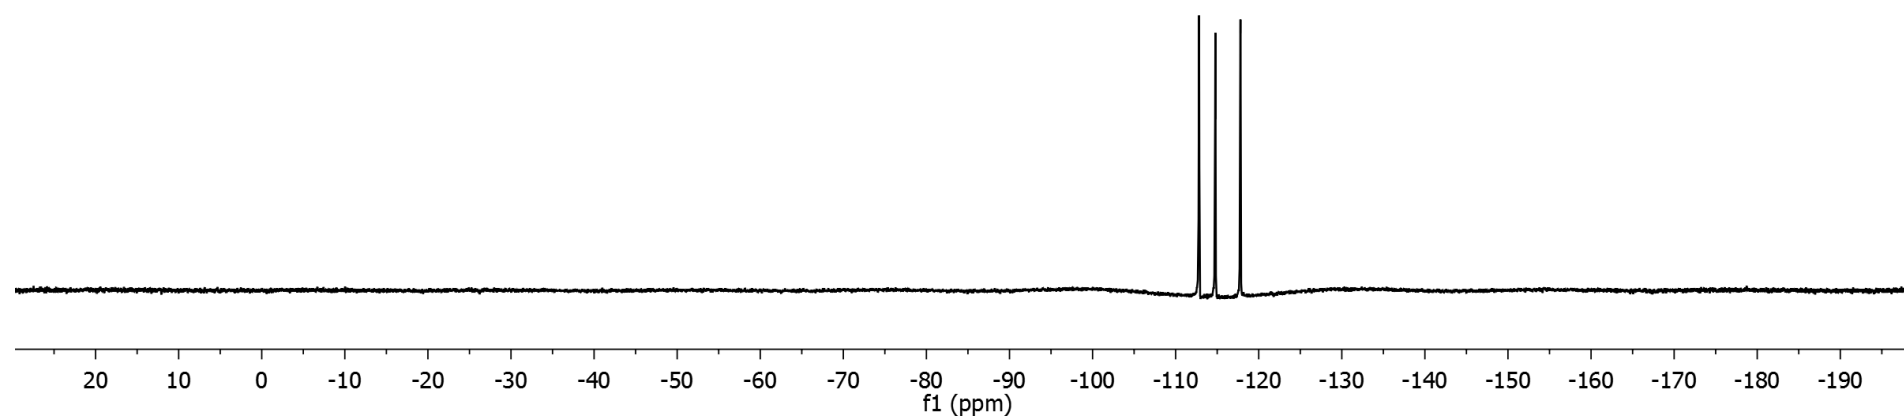

$^1\text{H}$  NMR of *N*-(4-fluorophenyl)benzamide ( $[\text{}^{19}\text{F}]\mathbf{7j}$ ):

500 MHz,  $\text{CD}_3\text{OD}$ , 23 °C

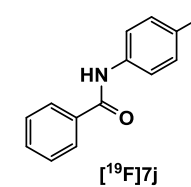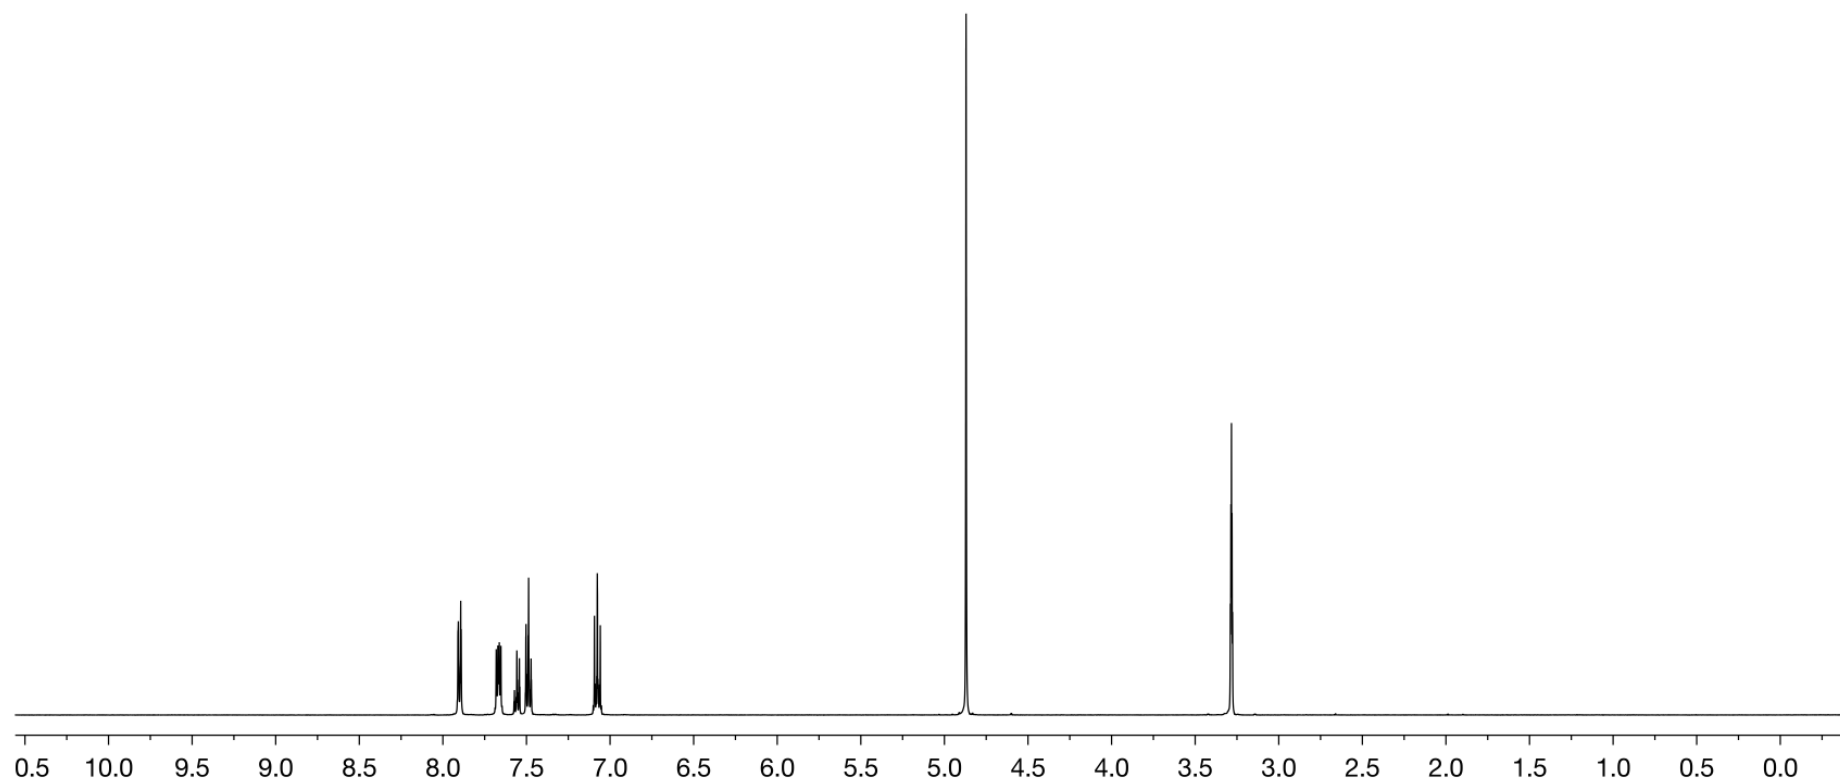

$^{13}\text{C}$  NMR of *N*-(4-fluorophenyl)benzamide ( $[\text{F}7]$ ):

125 MHz,  $\text{CD}_3\text{OD}$ , 23 °C

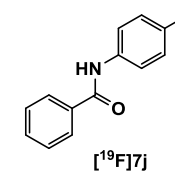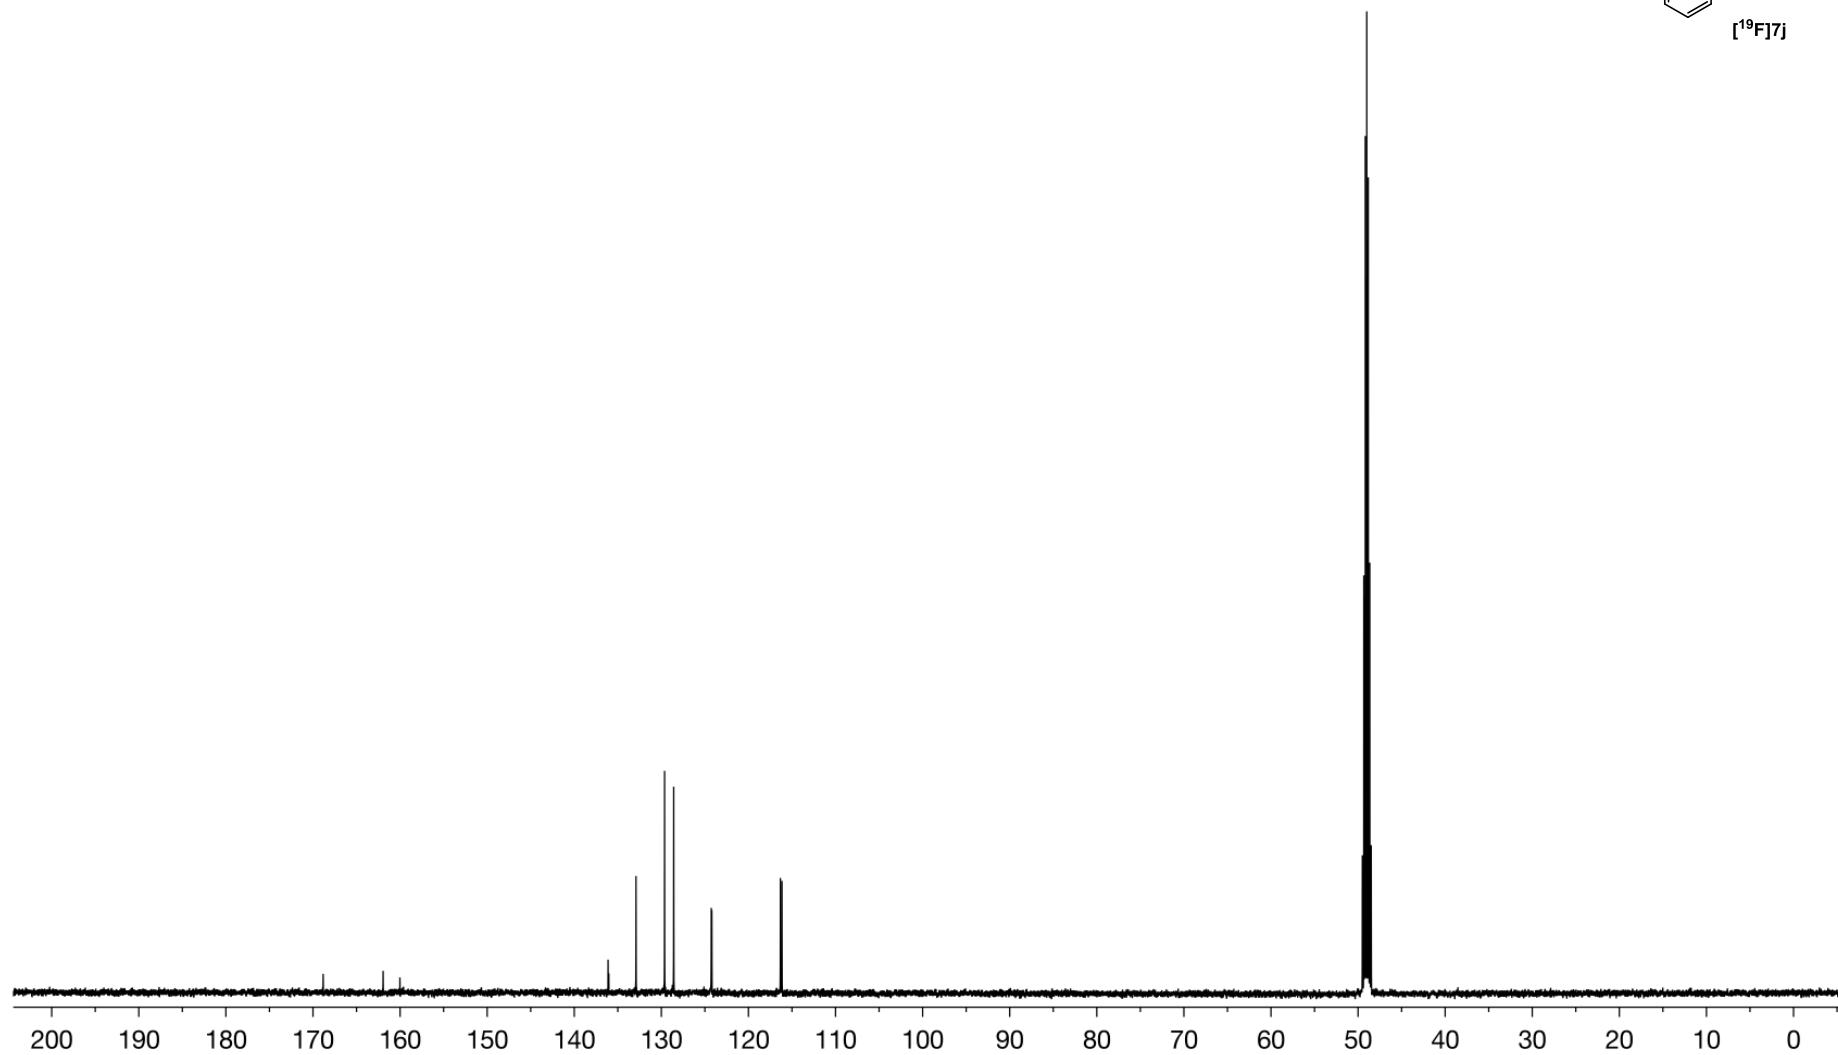

$^{19}\text{F}$  NMR of *N*-(4-fluorophenyl)benzamide (**[ $^{19}\text{F}$ ]7j**):

376 MHz,  $\text{CD}_3\text{OD}$ , 23 °C

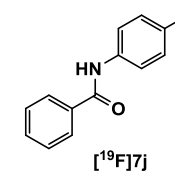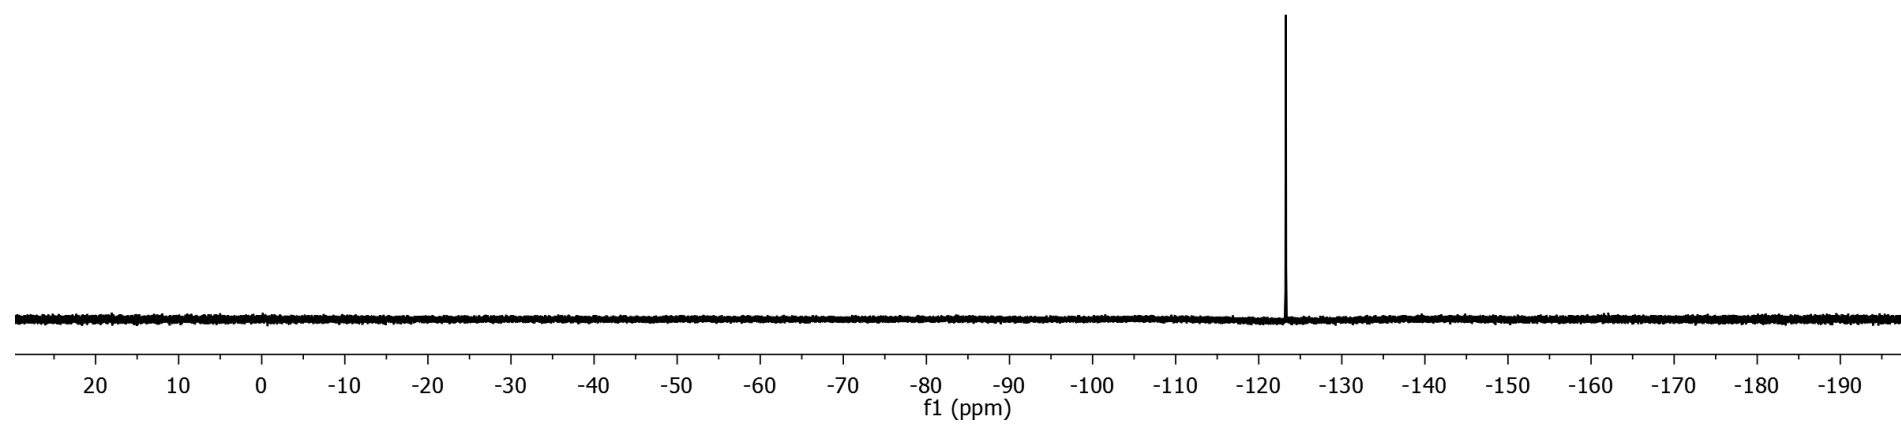

$^1\text{H}$  NMR of *tert*-butyl ((*S*)-1-(((2*S*,3*S*,4*R*,5*R*)-5-(6-(dimethylamino)-9*H*-purin-9-yl)-4-hydroxy-2-(hydroxymethyl)tetrahydrofuran-3-yl)amino)-3-(4-fluorophenyl)-1-oxopropan-2-yl)carbamate (**[ $^{19}\text{F}$ ]7I**):

500 MHz,  $\text{CD}_2\text{Cl}_2:\text{CD}_3\text{OD}$  (1:1), 23 °C

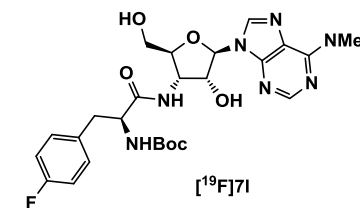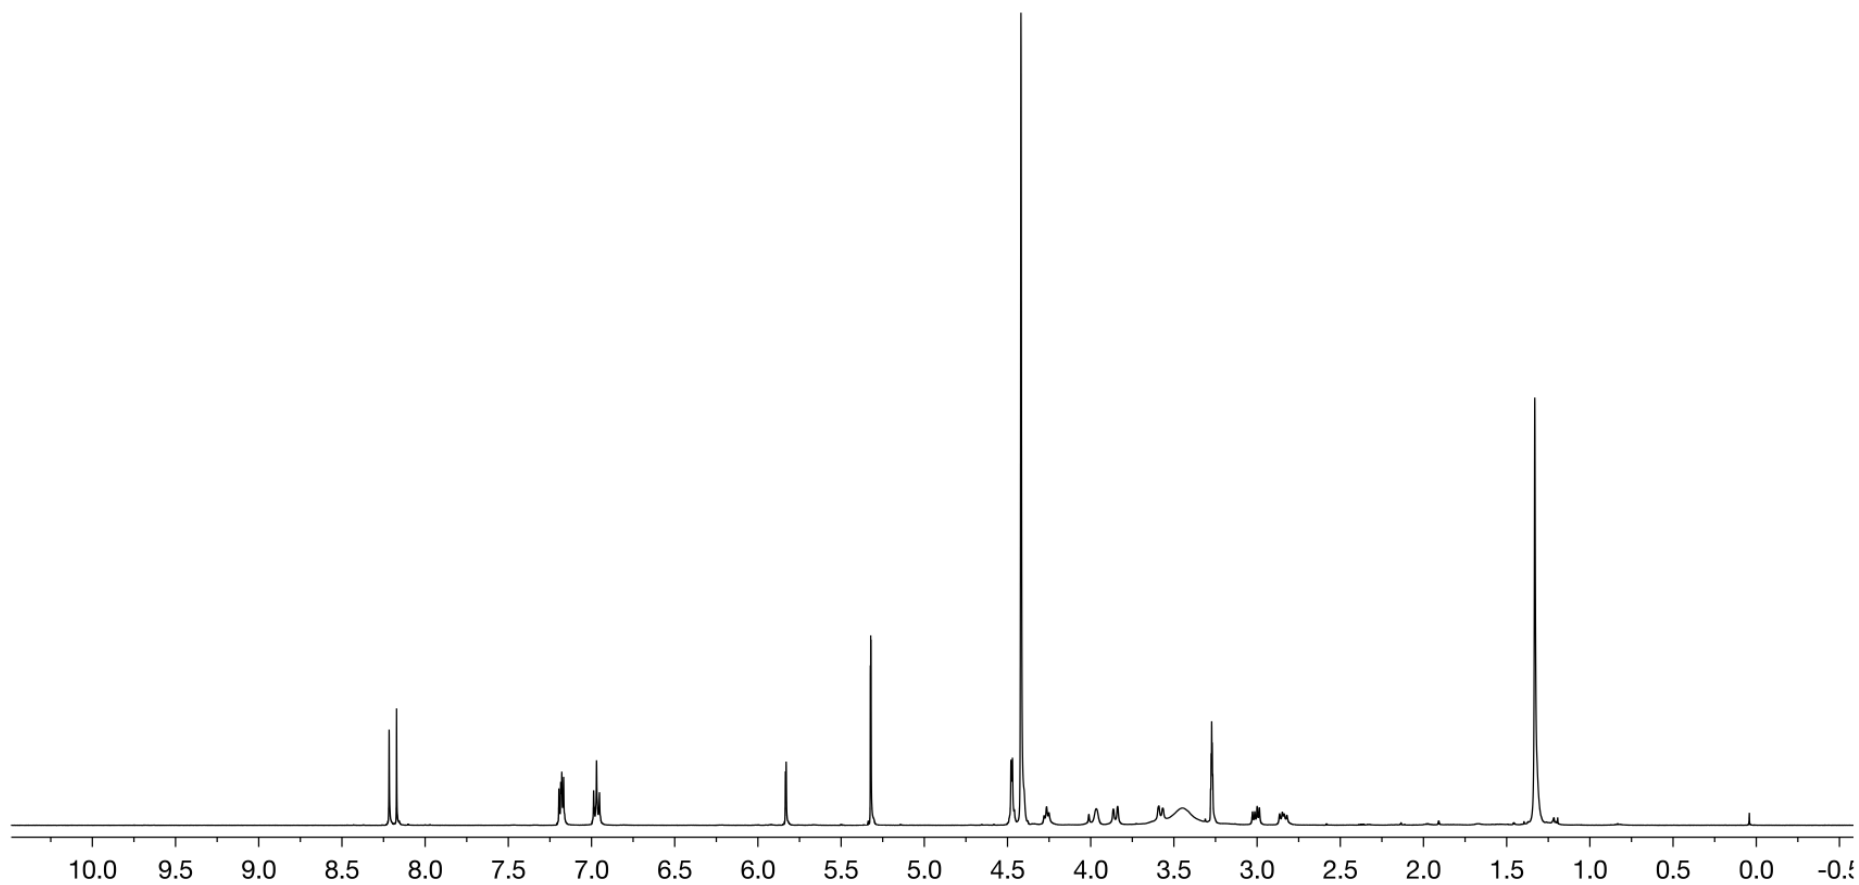



$^{13}\text{C}$  NMR of *tert*-butyl ((*S*)-1-(((2*S*,3*S*,4*R*,5*R*)-5-(6-(dimethylamino)-9*H*-purin-9-yl)-4-hydroxy-2-(hydroxymethyl)tetrahydrofuran-3-yl)amino)-3-(4-fluorophenyl)-1-oxopropan-2-yl)carbamate ( $[^{19}\text{F}]\mathbf{7I}$ ):

125 MHz,  $\text{CD}_2\text{Cl}_2:\text{CD}_3\text{OD}$  (1:1), 23 °C

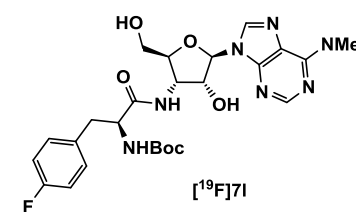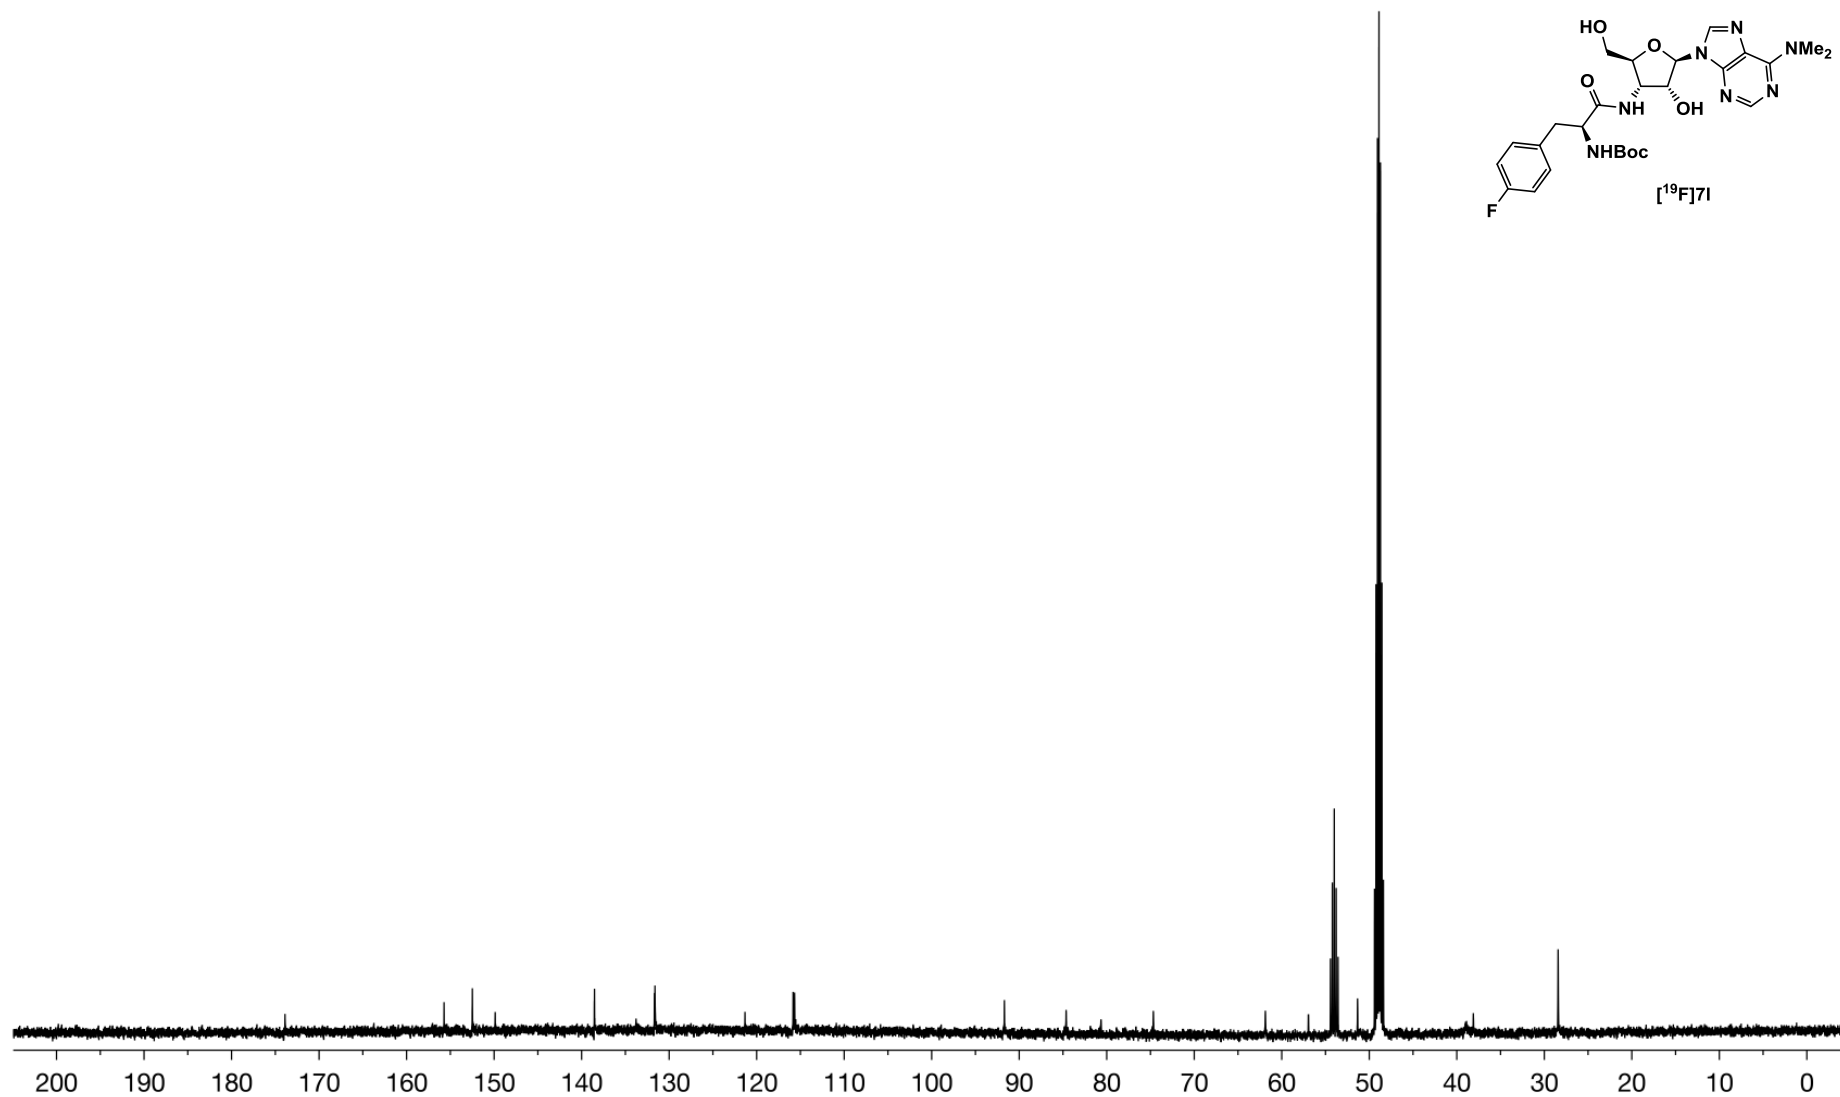

$^{19}\text{F}$  NMR of *tert*-butyl ((*S*)-1-(((2*S*,3*S*,4*R*,5*R*)-5-(6-(dimethylamino)-9*H*-purin-9-yl)-4-hydroxy-2-(hydroxymethyl)tetrahydrofuran-3-yl)amino)-3-(4-fluorophenyl)-1-oxopropan-2-yl)carbamate (**[ $^{19}\text{F}$ ]7I**):

471 MHz,  $\text{CD}_2\text{Cl}_2:\text{CD}_3\text{OD}$  (1:1), 23 °C

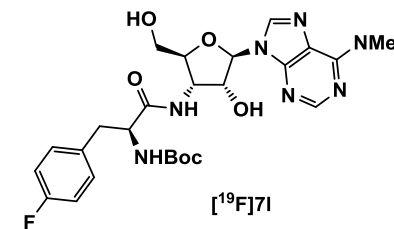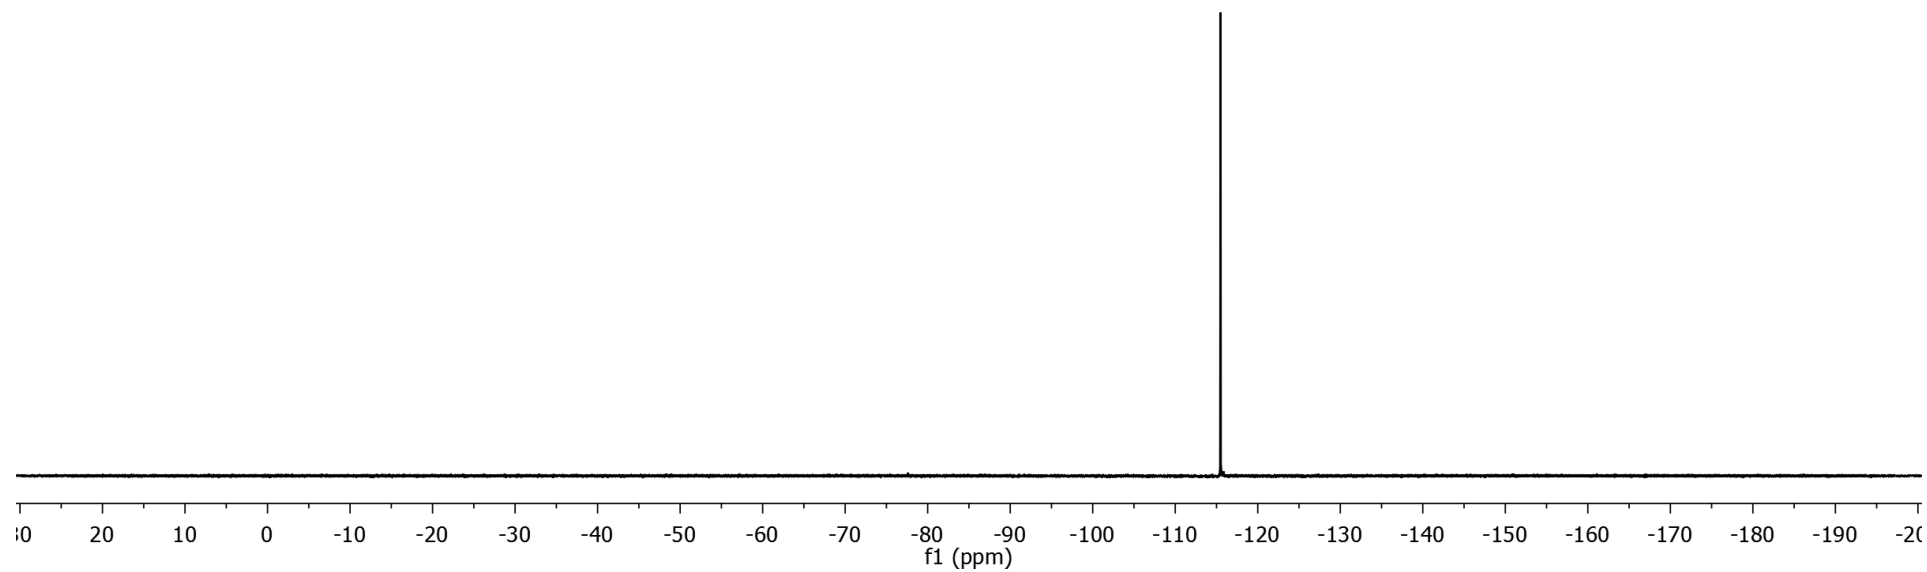

$^1\text{H}$  NMR of Methyl (S)-2-((*tert*-butoxycarbonyl)amino)-3-(4-fluorophenyl)propanoate ( $[^{19}\text{F}]\mathbf{7n}$ ):

500 MHz,  $\text{CDCl}_3$ , 23  $^\circ\text{C}$

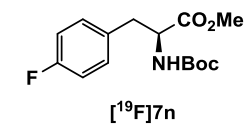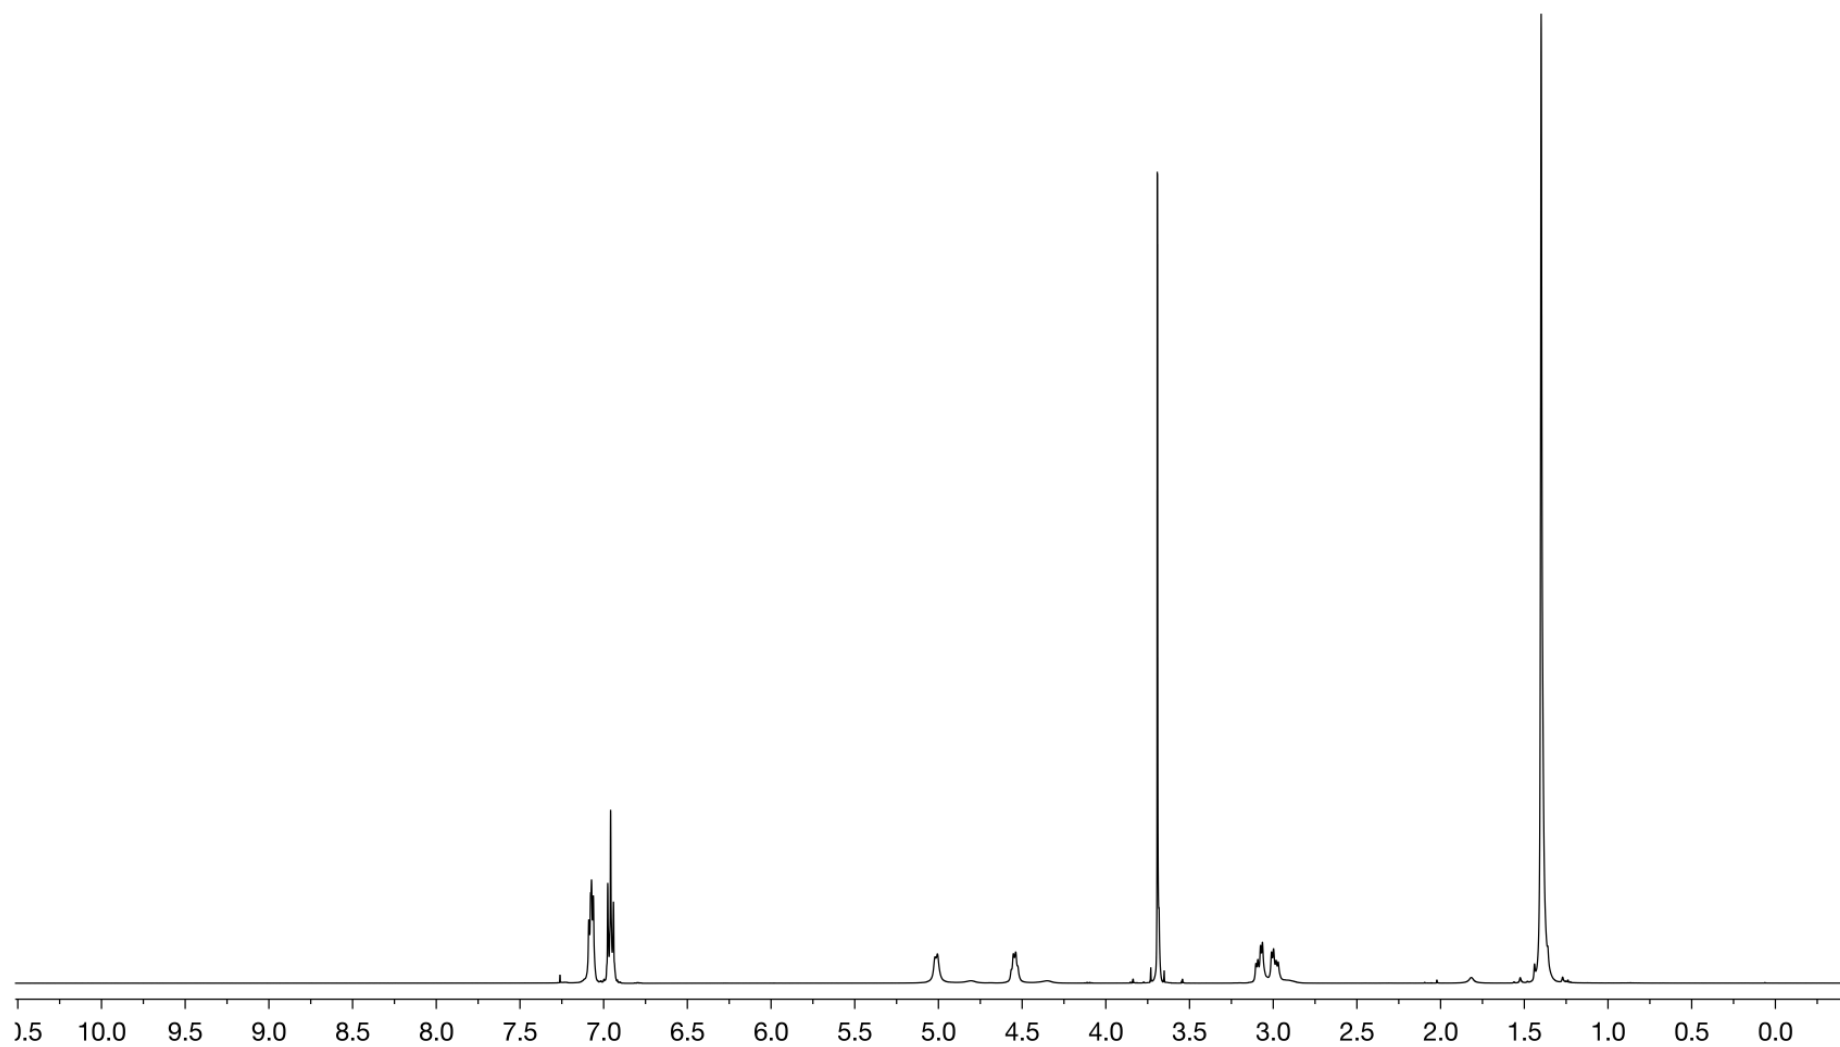

$^{13}\text{C}$  NMR of Methyl (*S*)-2-((*tert*-butoxycarbonyl)amino)-3-(4-fluorophenyl)propanoate ( $[\text{}^{19}\text{F}]\mathbf{7n}$ ):

125 MHz,  $\text{CDCl}_3$ , 23 °C

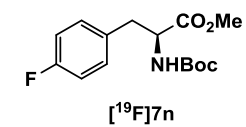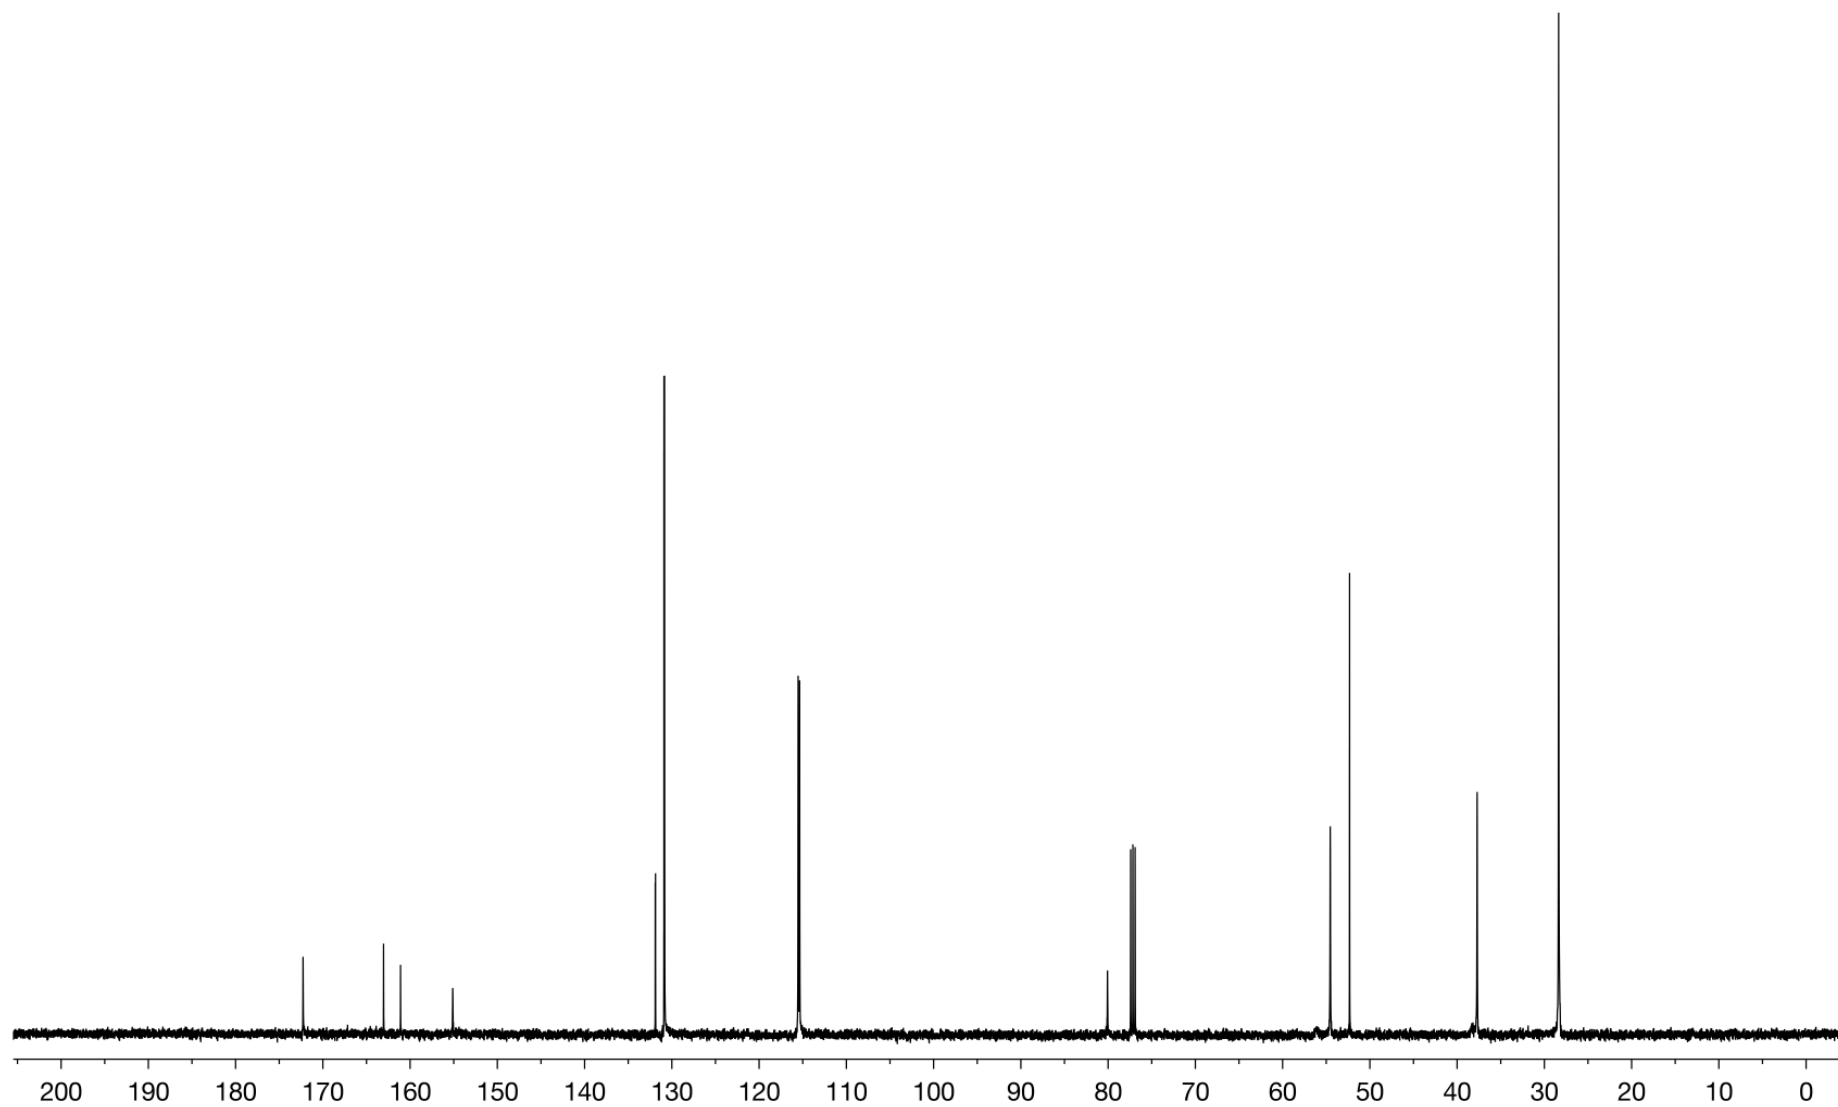

$^{19}\text{F}$  NMR of Methyl (S)-2-((*tert*-butoxycarbonyl)amino)-3-(4-fluorophenyl)propanoate (**[ $^{19}\text{F}$ ]7n**):

376 MHz,  $\text{CDCl}_3$ , 23 °C

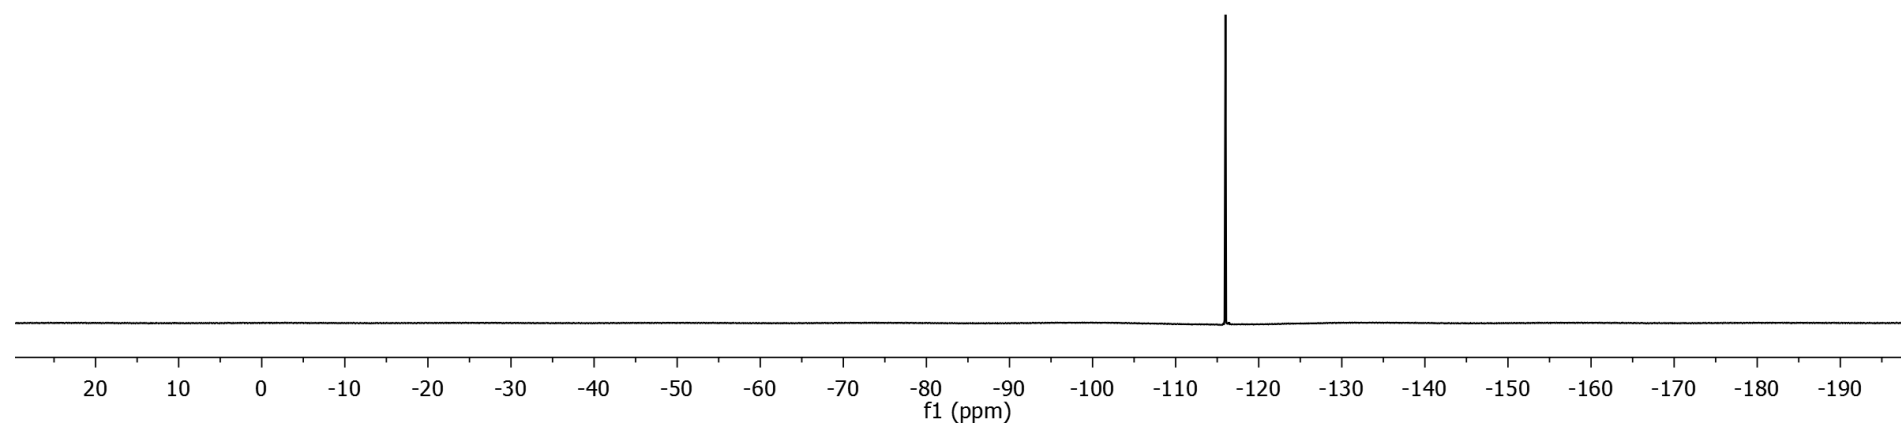

$^1\text{H}$  NMR of ethyl 4-fluoro-1*H*-indole-1-carboxylate ( $[^{19}\text{F}]\mathbf{7o}$ ):

600 MHz,  $\text{C}_6\text{D}_6$ , 23 °C

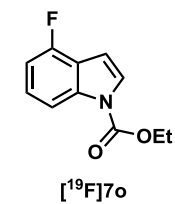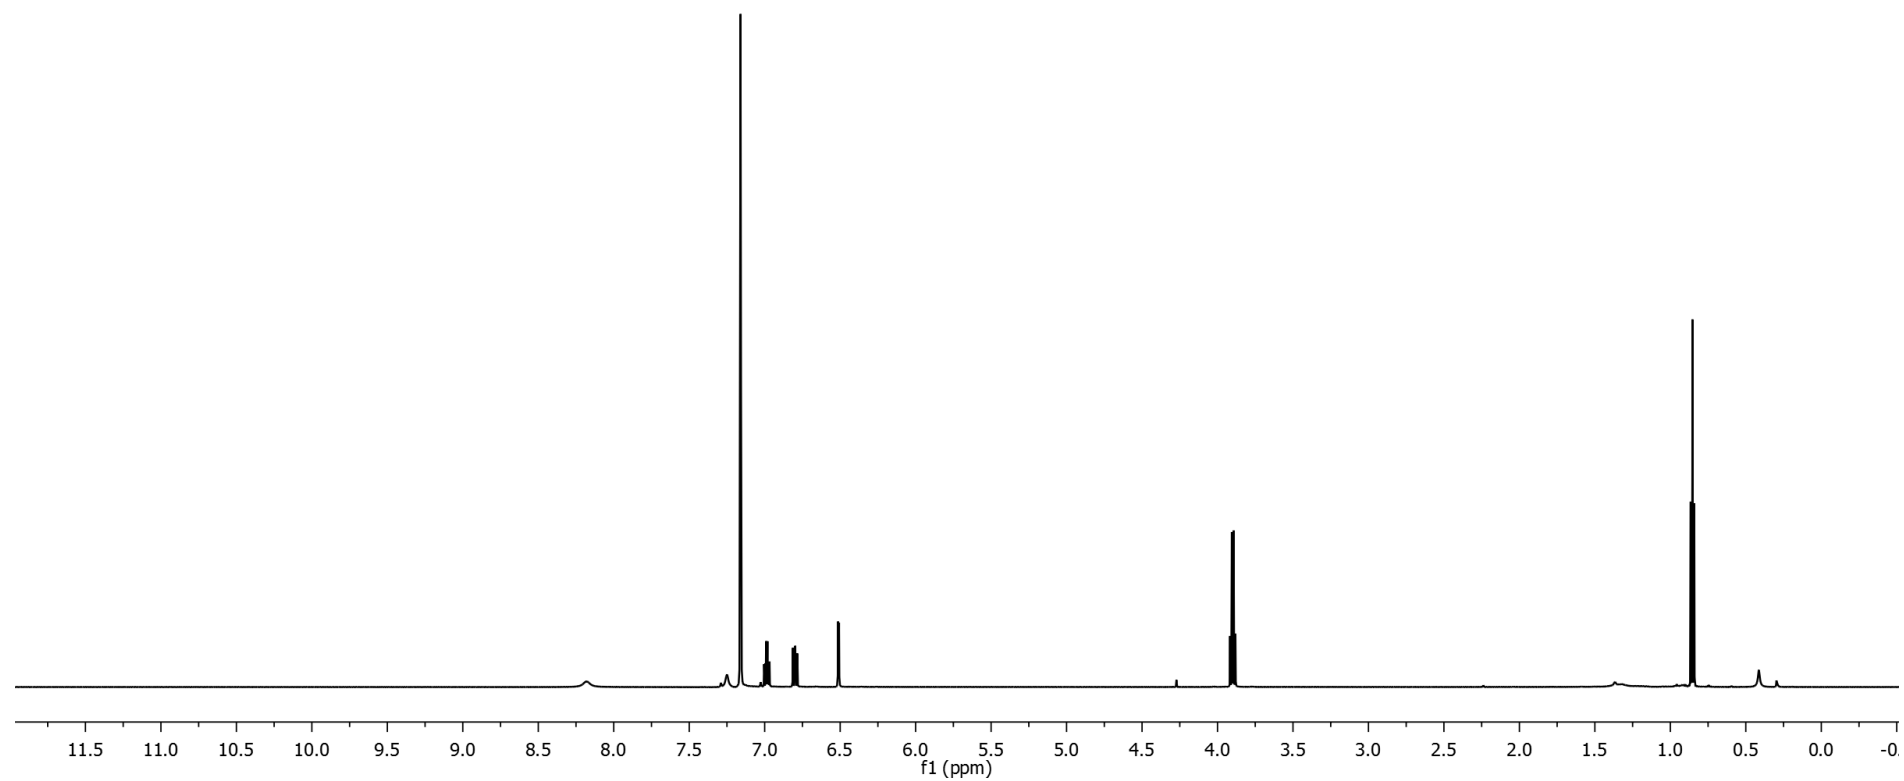

$^{13}\text{C}$  NMR of ethyl 4-fluoro-1*H*-indole-1-carboxylate ( $[^{19}\text{F}]\mathbf{7o}$ ):

126 MHz,  $\text{C}_6\text{D}_6$ , 23 °C

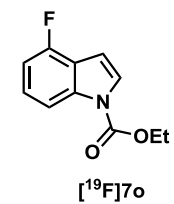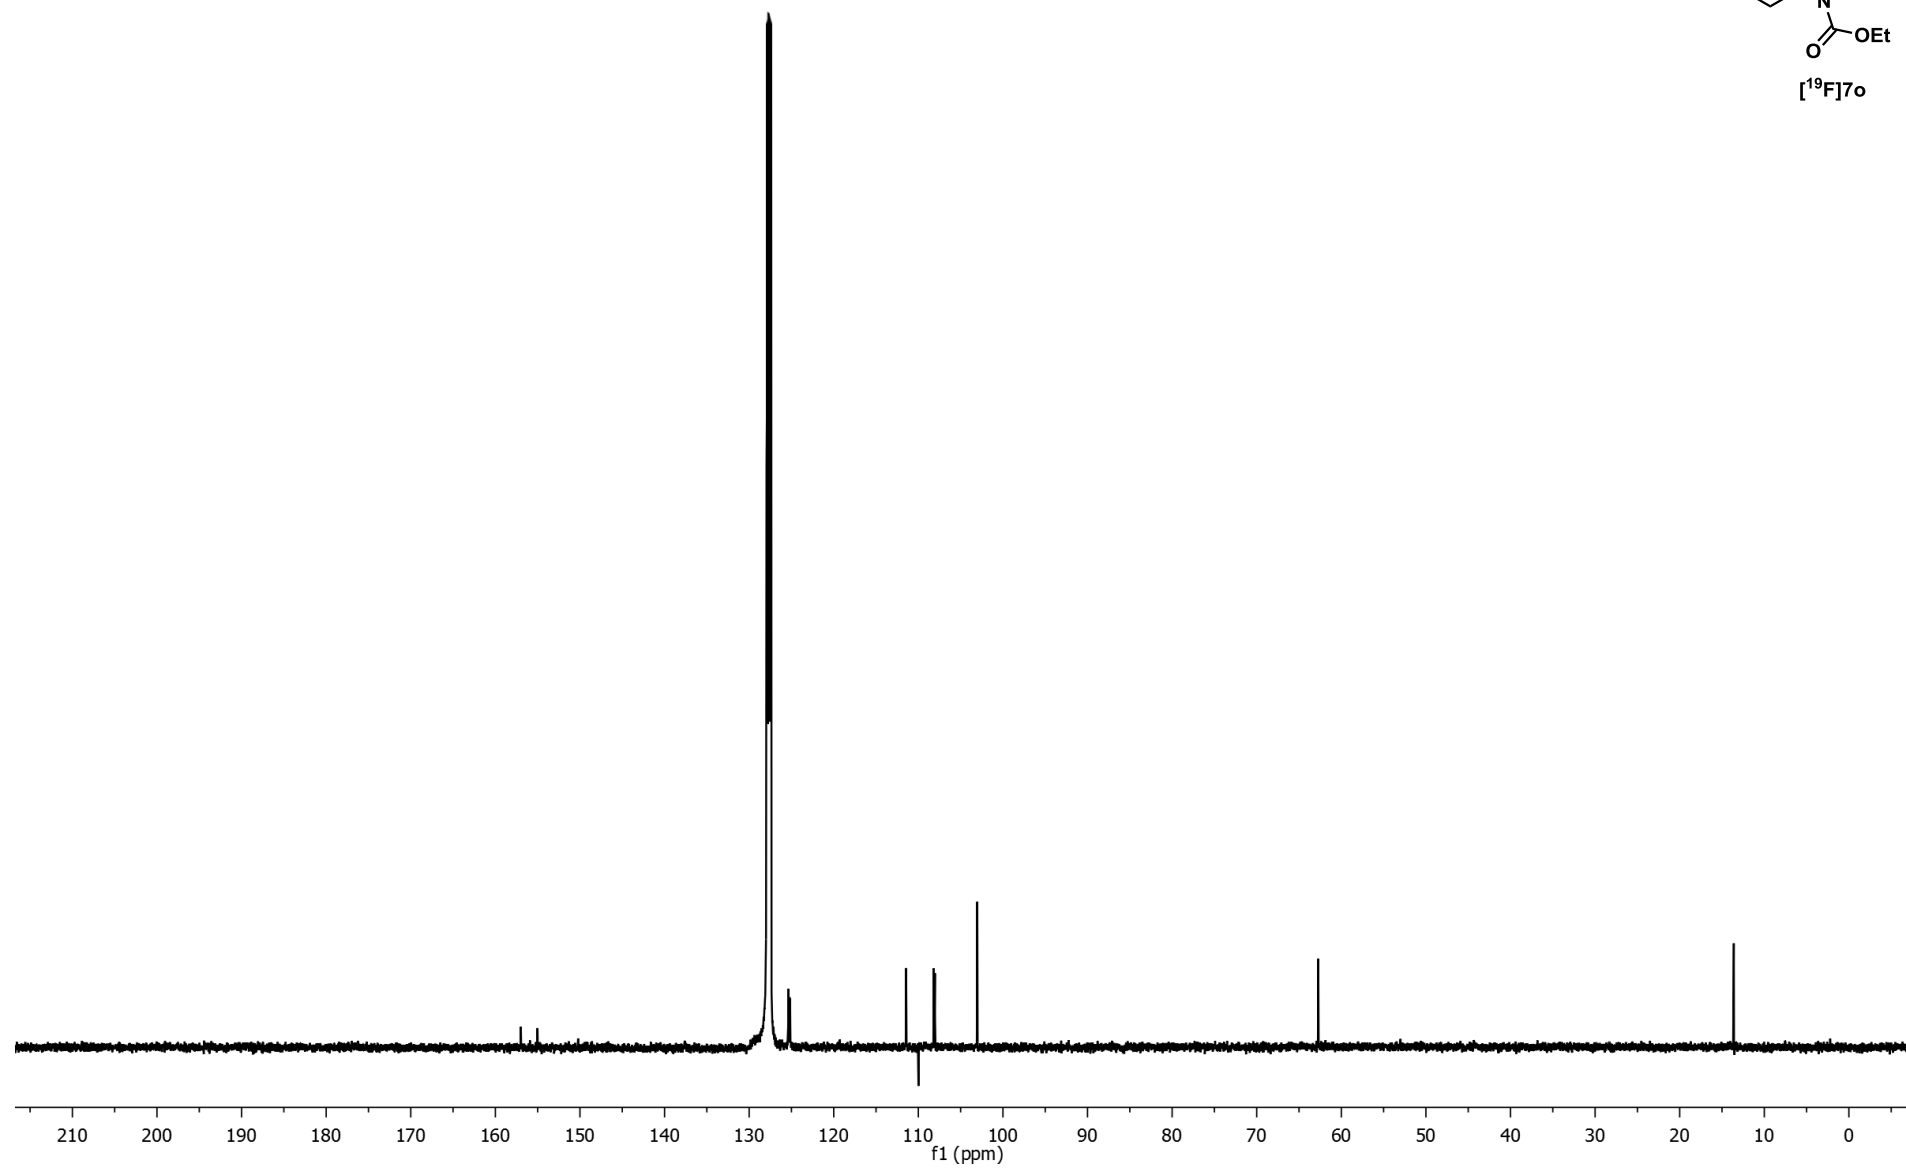

$^{19}\text{F}$  NMR of ethyl 4-fluoro-1*H*-indole-1-carboxylate ( $[^{19}\text{F}]\mathbf{7o}$ ):

471 MHz,  $\text{C}_6\text{D}_6$ , 23 °C

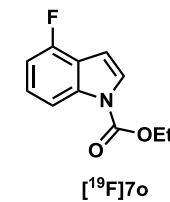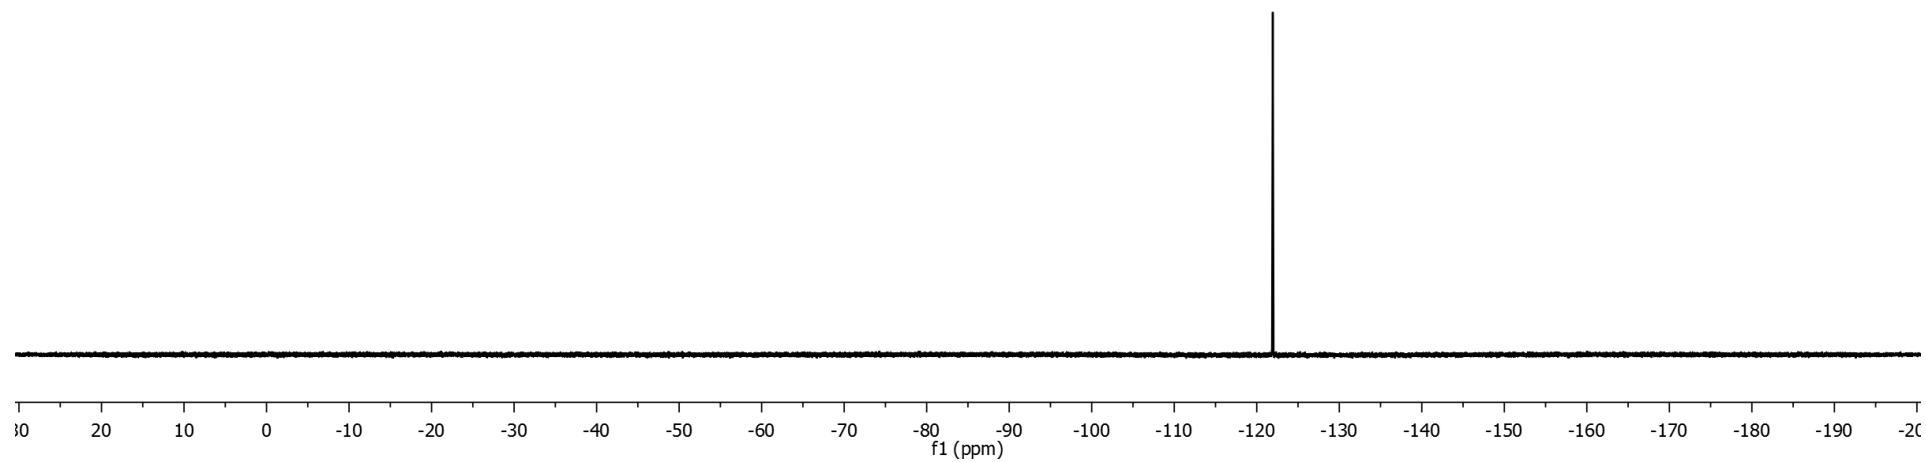



$^1\text{H}$  NMR of (R)-6-fluoro-2,8-dimethyl-2-((4R,8R)-4,8,12-trimethyltridecyl)chromane ( $[\text{}^{19}\text{F}]\mathbf{7p}$ ):

600 MHz,  $\text{CDCl}_3$ , 23  $^\circ\text{C}$

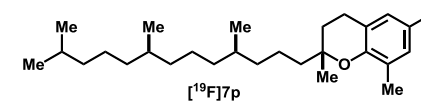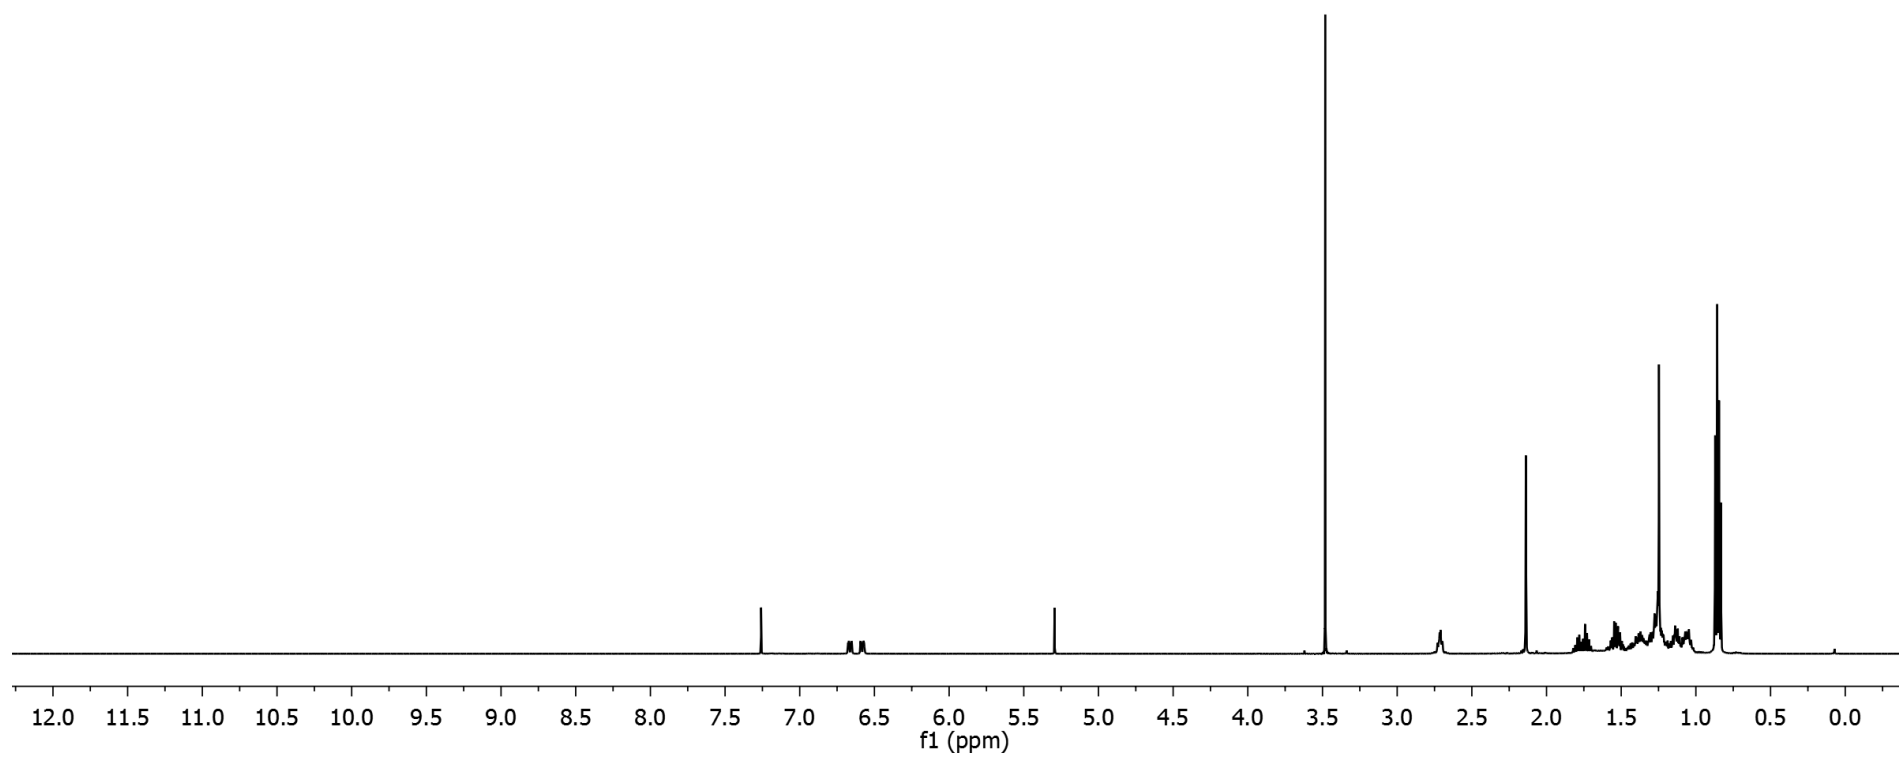

$^{13}\text{C}$  NMR of (*R*)-6-fluoro-2,8-dimethyl-2-((4*R*,8*R*)-4,8,12-trimethyltridecyl)chromane ( $[\text{F}]\mathbf{7p}$ ):

126 MHz,  $\text{CDCl}_3$ , 23 °C

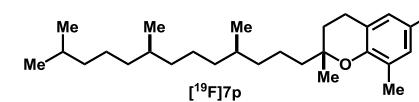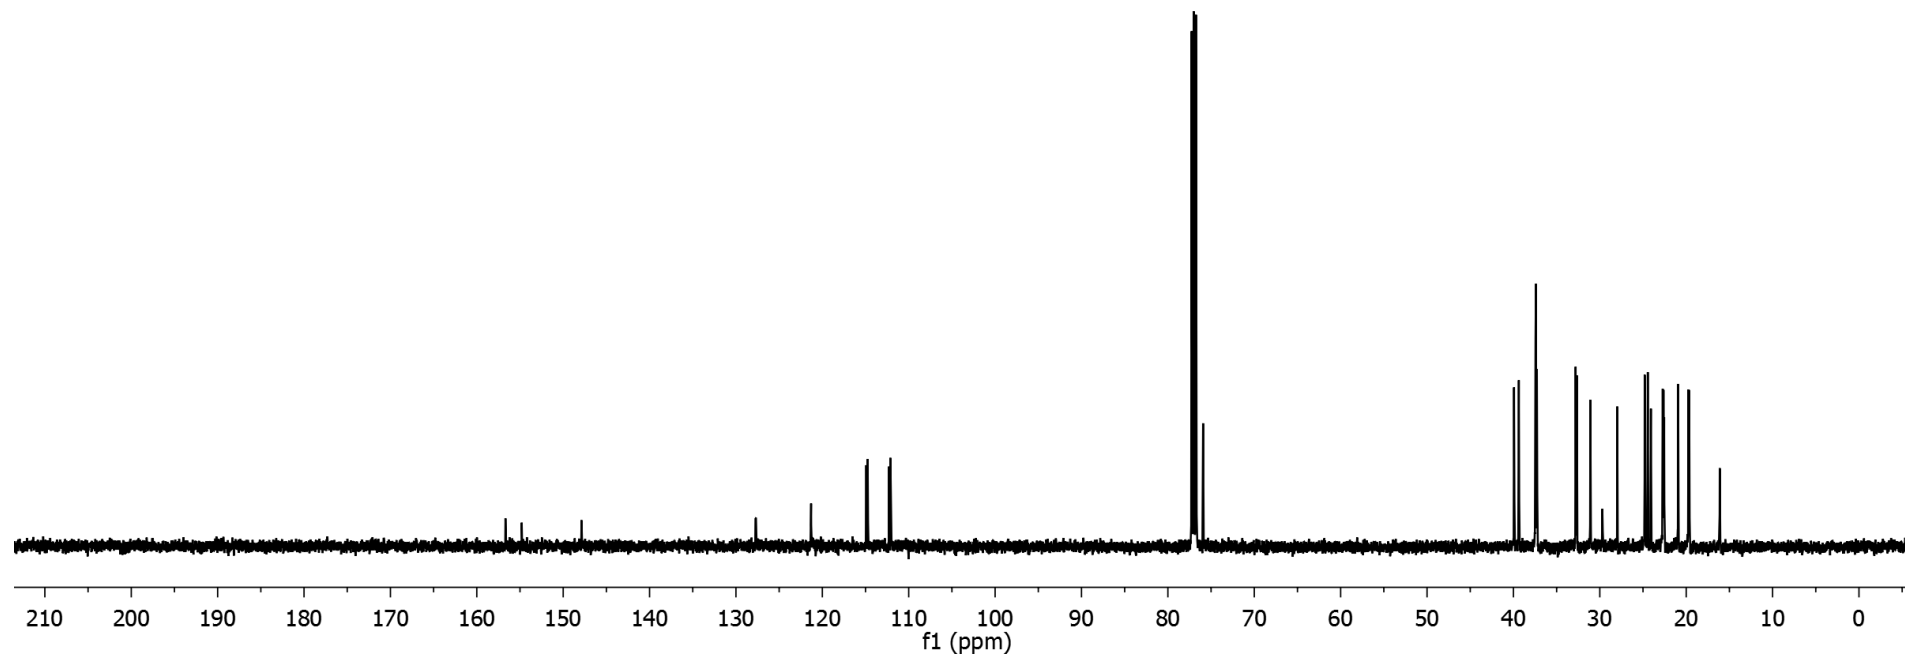

$^{19}\text{F}$  NMR of (*R*)-6-fluoro-2,8-dimethyl-2-((4*R*,8*R*)-4,8,12-trimethyltridecyl)chromane (**[ $^{19}\text{F}$ ]7p**):

471 MHz,  $\text{CDCl}_3$ , 23 °C

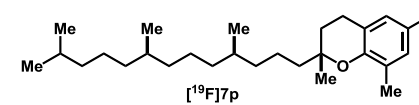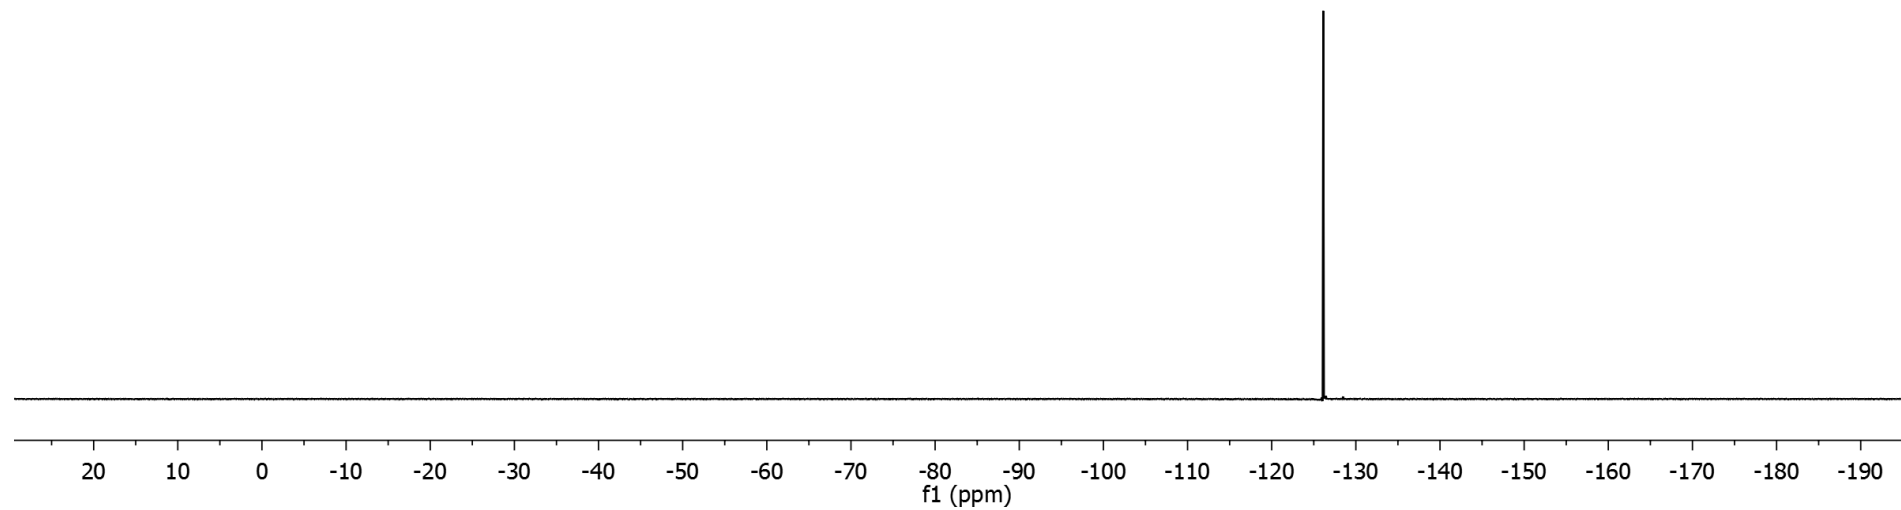

$^1\text{H}$  NMR of methyl (S)-2-acetamido-3-(4-fluorophenyl)propanoate (**[ $^{19}\text{F}$ ]**9**):**

600 MHz,  $\text{CDCl}_3$ , 23  $^\circ\text{C}$

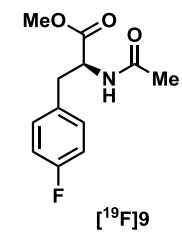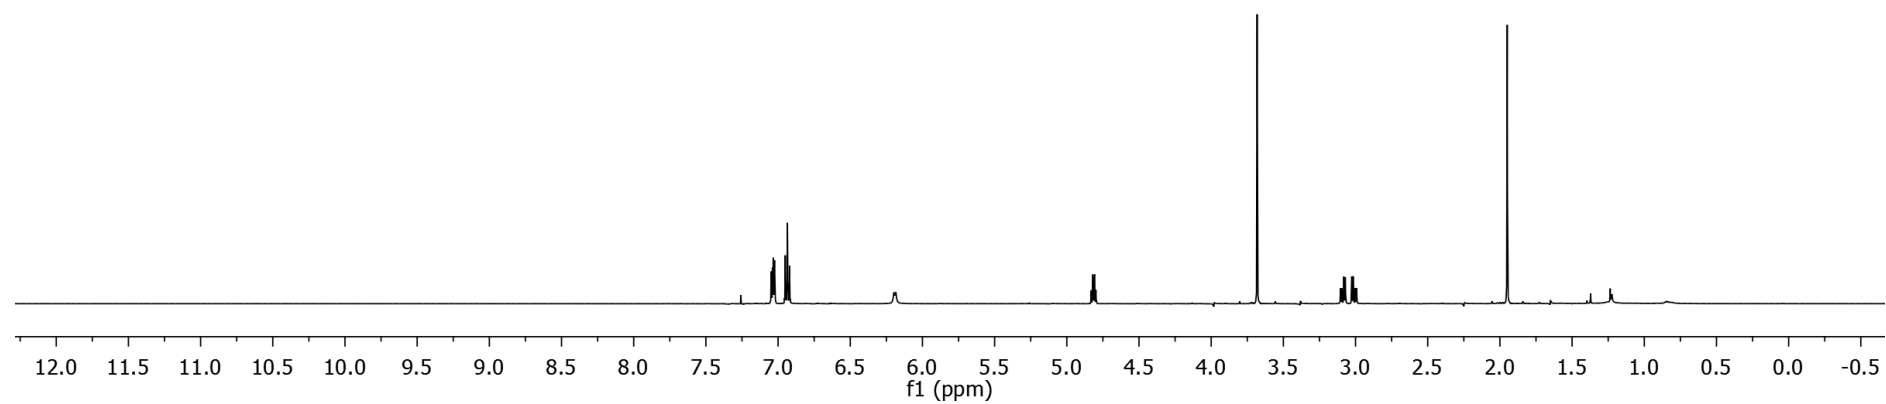

$^{13}\text{C}$  NMR of methyl (*S*)-2-acetamido-3-(4-fluorophenyl)propanoate ( $[\text{}^{19}\text{F}]\mathbf{9}$ ):

126 MHz,  $\text{CDCl}_3$ , 23 °C

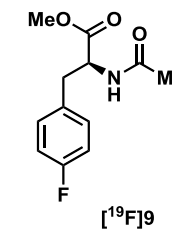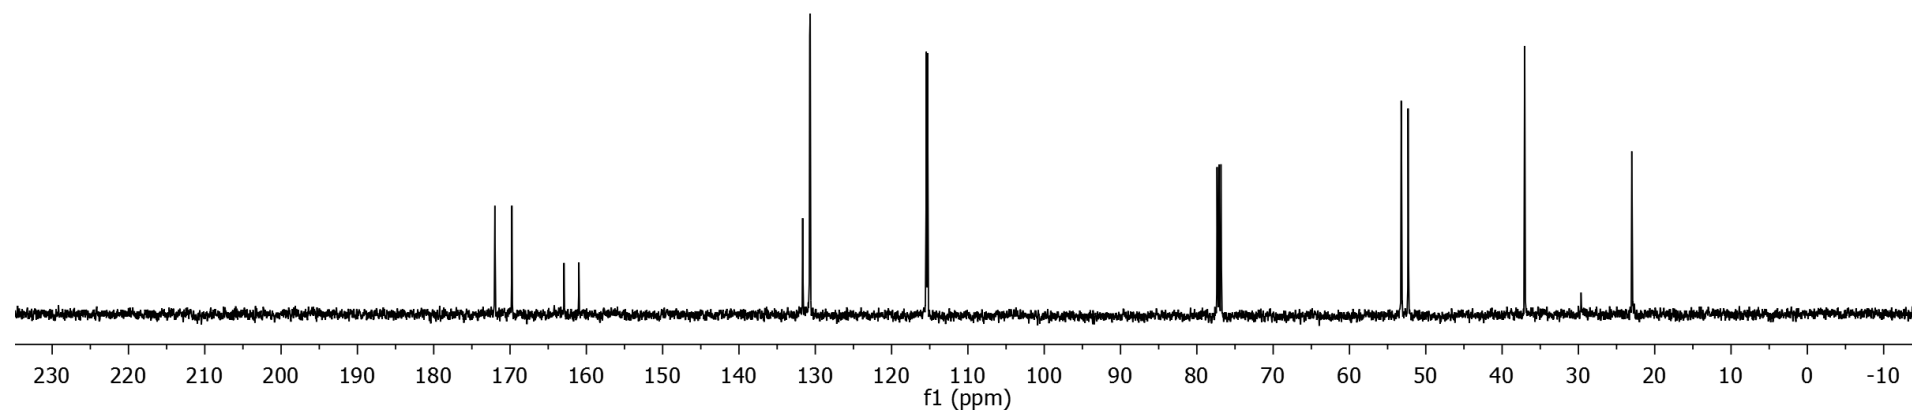

$^{19}\text{F}$  NMR of (methyl (S)-2-acetamido-3-(4-fluorophenyl)propanoate (**[ $^{19}\text{F}$ ]**9****):

471 MHz,  $\text{CDCl}_3$ , 23 °C

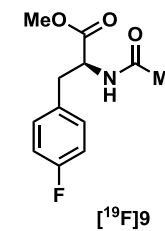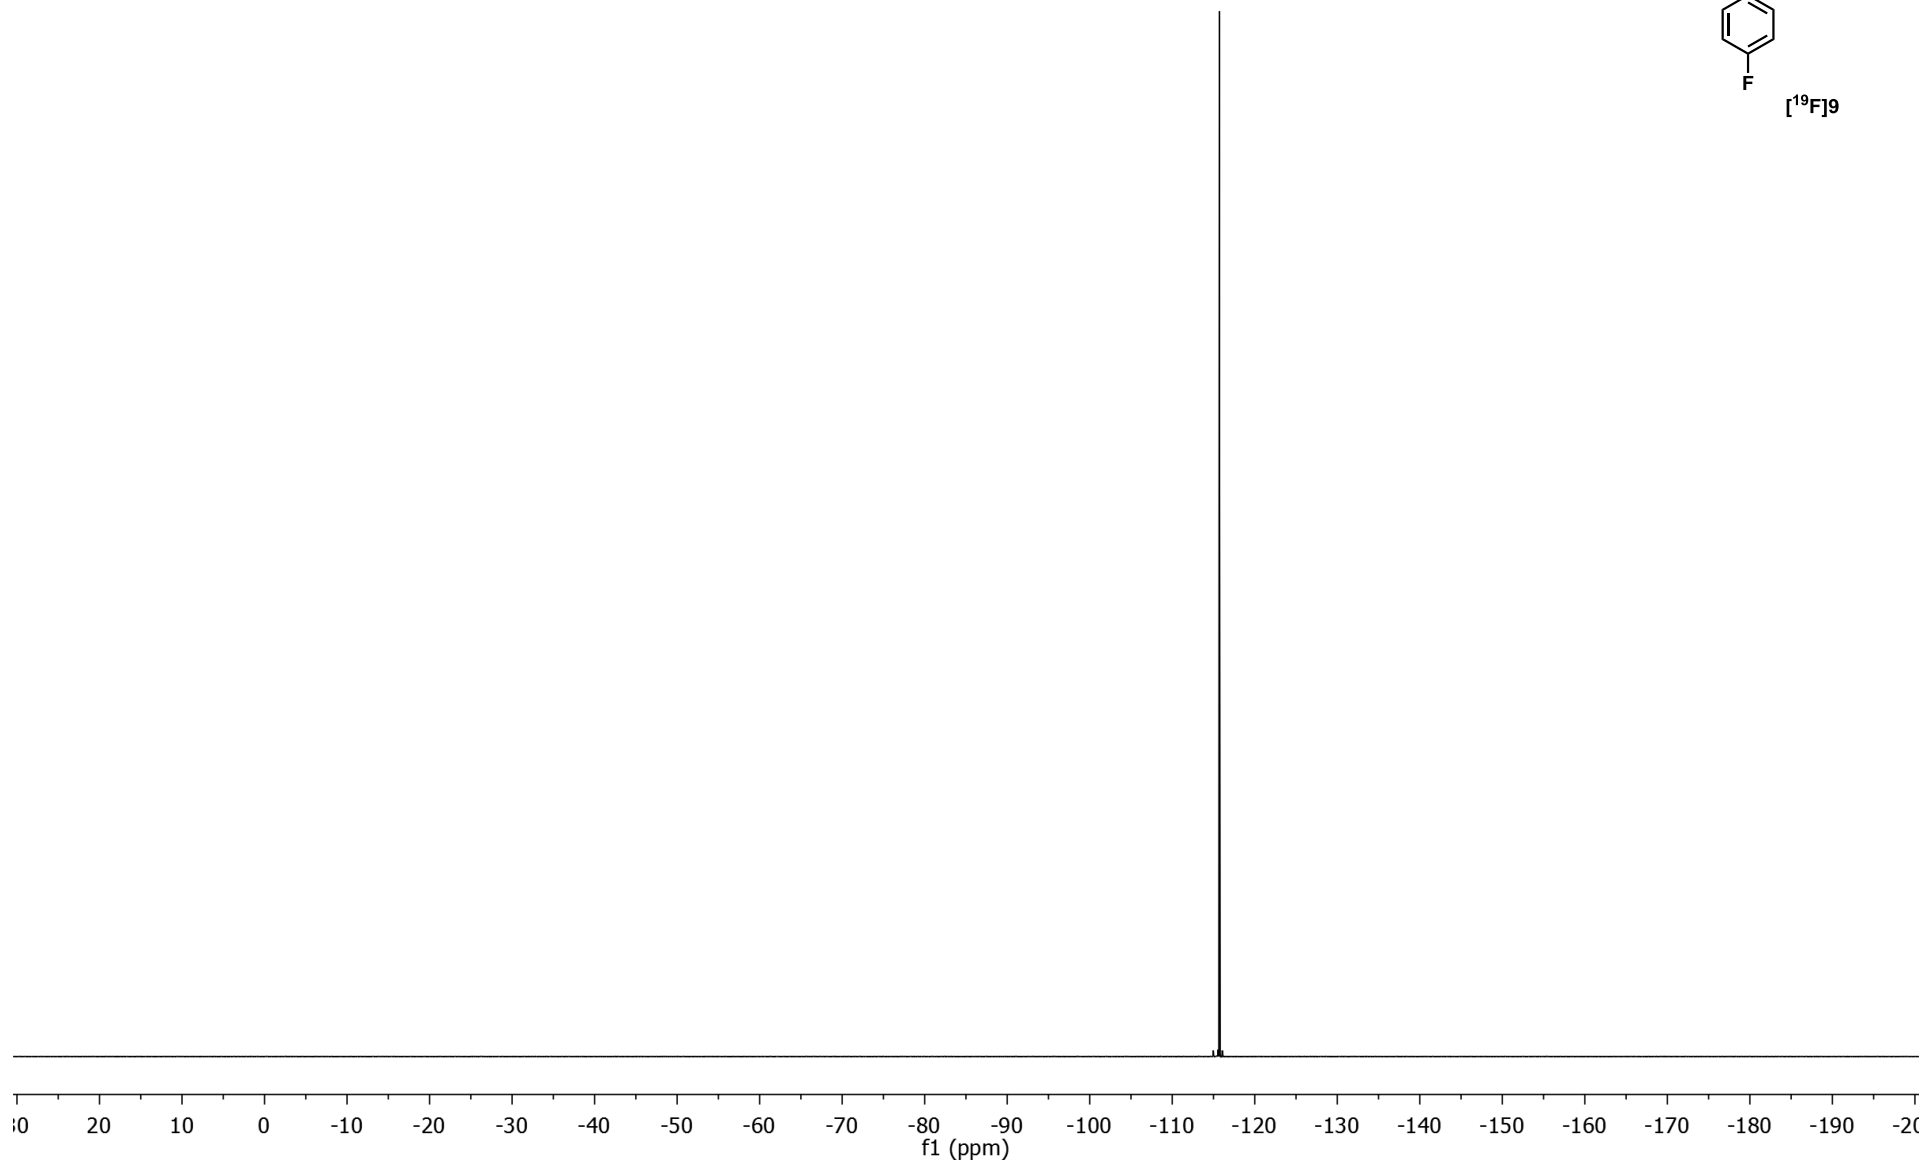

Supplement: oc7b00195_si_001.pdf [file oc7b00195_si_001.pdf]
